# Supplementary material for: A large scale Plasmodium vivax- Saimiri boliviensis trophozoite-schizont transition proteome
Source: PLoS One. 2017 Aug 22;12(8):e0182561. doi: 10.1371/journal.pone.0182561 (PMC5567661; doi:10.1371/journal.pone.0182561)
Supplement: S1 Table — This table shows Proteome 1 identifications using 5 different search engines. P. vivax proteins are indicated by accession numbers beginning with PvP01_ and S. boliviensis proteins are identified by accession numbers consisting of nine numbers. Crux did not include protein annotations with identifications. XID is the identification number of the protein; Xrep is the number of search engines identifying the protein. Proteins identified by all 5 engines are listed in the worksheet "5x of 5x"; proteins identified by only one of 5 engines are in the worksheet "1x of 5x" etc. Avg. Xrep is the average number of times a search engine identified a protein from within the four individual 2D lc/ms/ms runs for each proteome. For Maxquant, all four individual 2D lc/ms/ms runs were analyzed at once (giving more identifications than analyzing each run separately), thus Avg. Xrep is 1 for all proteins. For Sequest, all four 2D lc/ms/ms runs were analyzed twice (see the methods section), thus Avg. Xrep is maximally 8 for Sequest. (XLS) [file pone.0182561.s001.xls]

## Sheet: !XPRep1
403253974	5	Maxquant	4	Mascot	6	MSGF	5	Sequest	4	Crux	4
403254300	5	Maxquant	8	Mascot	14	MSGF	12	Sequest	8	Crux	7
403254367	5	Maxquant	9	Mascot	16	MSGF	16	Sequest	11	Crux	9
403254832	5	Maxquant	16	Mascot	23	MSGF	26	Sequest	19	Crux	11
403255088	5	Maxquant	17	Mascot	27	MSGF	29	Sequest	21	Crux	12
403255365	5	Maxquant	19	Mascot	30	MSGF	33	Sequest	24	Crux	14
403255416	5	Maxquant	20	Mascot	32	MSGF	34	Sequest	26	Crux	15
403255709	5	Maxquant	23	Mascot	41	MSGF	40	Sequest	31	Crux	17
403255885	5	Maxquant	25	Mascot	43	MSGF	42	Sequest	33	Crux	19
403256221	5	Maxquant	29	Mascot	53	MSGF	50	Sequest	42	Crux	22
403256341	5	Maxquant	30	Mascot	55	MSGF	54	Sequest	44	Crux	24
403256628	5	Maxquant	31	Mascot	59	MSGF	57	Sequest	45	Crux	25
403256636	5	Maxquant	32	Mascot	60	MSGF	58	Sequest	46	Crux	26
403256754	5	Maxquant	33	Mascot	63	MSGF	63	Sequest	51	Crux	29
403256779	5	Maxquant	34	Mascot	65	MSGF	64	Sequest	52	Crux	30
403257409	5	Maxquant	38	Mascot	79	MSGF	77	Sequest	62	Crux	36
403258111	5	Maxquant	41	Mascot	90	MSGF	86	Sequest	71	Crux	38
403258137	5	Maxquant	42	Mascot	91	MSGF	87	Sequest	72	Crux	39
403258531	5	Maxquant	45	Mascot	104	MSGF	97	Sequest	75	Crux	43
403259324	5	Maxquant	52	Mascot	123	MSGF	106	Sequest	86	Crux	45
403259393	5	Maxquant	53	Mascot	125	MSGF	110	Sequest	87	Crux	46
403259399	5	Maxquant	54	Mascot	126	MSGF	111	Sequest	88	Crux	47
403259549	5	Maxquant	56	Mascot	130	MSGF	114	Sequest	90	Crux	48
403259801	5	Maxquant	57	Mascot	135	MSGF	117	Sequest	91	Crux	49
403259932	5	Maxquant	60	Mascot	138	MSGF	121	Sequest	94	Crux	51
403260458	5	Maxquant	63	Mascot	150	MSGF	129	Sequest	103	Crux	54
403260495	5	Maxquant	65	Mascot	152	MSGF	131	Sequest	105	Crux	55
403260551	5	Maxquant	66	Mascot	154	MSGF	134	Sequest	107	Crux	56
403260559	5	Maxquant	67	Mascot	155	MSGF	135	Sequest	108	Crux	57
403260589	5	Maxquant	69	Mascot	157	MSGF	138	Sequest	110	Crux	59
403260616	5	Maxquant	71	Mascot	160	MSGF	140	Sequest	112	Crux	60
403260666	5	Maxquant	72	Mascot	163	MSGF	142	Sequest	114	Crux	62
403261564	5	Maxquant	78	Mascot	177	MSGF	160	Sequest	124	Crux	64
403261702	5	Maxquant	81	Mascot	182	MSGF	167	Sequest	128	Crux	65
403261934	5	Maxquant	82	Mascot	191	MSGF	173	Sequest	132	Crux	68
403261968	5	Maxquant	83	Mascot	192	MSGF	174	Sequest	133	Crux	69
403262065	5	Maxquant	85	Mascot	195	MSGF	177	Sequest	134	Crux	70
403262067	5	Maxquant	86	Mascot	196	MSGF	178	Sequest	135	Crux	71
403262505	5	Maxquant	89	Mascot	199	MSGF	182	Sequest	138	Crux	72
403262853	5	Maxquant	92	Mascot	207	MSGF	189	Sequest	143	Crux	75
403263198	5	Maxquant	95	Mascot	216	MSGF	197	Sequest	149	Crux	78
403263938	5	Maxquant	103	Mascot	235	MSGF	212	Sequest	160	Crux	82
403264120	5	Maxquant	104	Mascot	240	MSGF	216	Sequest	164	Crux	85
403264400	5	Maxquant	107	Mascot	245	MSGF	219	Sequest	168	Crux	86
403264413	5	Maxquant	108	Mascot	246	MSGF	221	Sequest	170	Crux	87
403265000	5	Maxquant	111	Mascot	255	MSGF	228	Sequest	183	Crux	88
403266218	5	Maxquant	125	Mascot	284	MSGF	252	Sequest	210	Crux	96
403266627	5	Maxquant	127	Mascot	290	MSGF	254	Sequest	213	Crux	97
403266670	5	Maxquant	128	Mascot	291	MSGF	255	Sequest	214	Crux	98
403266781	5	Maxquant	130	Mascot	295	MSGF	258	Sequest	217	Crux	100
403266892	5	Maxquant	131	Mascot	297	MSGF	260	Sequest	219	Crux	101
403266946	5	Maxquant	133	Mascot	299	MSGF	263	Sequest	221	Crux	102
403267213	5	Maxquant	135	Mascot	302	MSGF	269	Sequest	224	Crux	103
403267274	5	Maxquant	136	Mascot	304	MSGF	271	Sequest	226	Crux	105
403268090	5	Maxquant	140	Mascot	321	MSGF	288	Sequest	234	Crux	111
403268100	5	Maxquant	141	Mascot	322	MSGF	289	Sequest	235	Crux	112
403268248	5	Maxquant	144	Mascot	325	MSGF	294	Sequest	238	Crux	113
403268562	5	Maxquant	146	Mascot	330	MSGF	297	Sequest	241	Crux	114
403268595	5	Maxquant	147	Mascot	331	MSGF	299	Sequest	242	Crux	115
403268696	5	Maxquant	150	Mascot	333	MSGF	302	Sequest	244	Crux	116
403268775	5	Maxquant	152	Mascot	335	MSGF	304	Sequest	246	Crux	117
403268779	5	Maxquant	153	Mascot	336	MSGF	305	Sequest	248	Crux	118
403268805	5	Maxquant	154	Mascot	337	MSGF	306	Sequest	250	Crux	119
403269084	5	Maxquant	155	Mascot	340	MSGF	309	Sequest	251	Crux	120
403269140	5	Maxquant	156	Mascot	341	MSGF	310	Sequest	252	Crux	121
403269439	5	Maxquant	157	Mascot	347	MSGF	313	Sequest	254	Crux	122
403269554	5	Maxquant	159	Mascot	350	MSGF	318	Sequest	258	Crux	124
403270715	5	Maxquant	165	Mascot	372	MSGF	340	Sequest	274	Crux	126
403271017	5	Maxquant	170	Mascot	382	MSGF	349	Sequest	284	Crux	129
403271047	5	Maxquant	171	Mascot	383	MSGF	351	Sequest	288	Crux	131
403271458	5	Maxquant	173	Mascot	393	MSGF	356	Sequest	295	Crux	133
403271545	5	Maxquant	174	Mascot	394	MSGF	358	Sequest	296	Crux	134
403271668	5	Maxquant	177	Mascot	399	MSGF	364	Sequest	301	Crux	135
403272179	5	Maxquant	179	Mascot	409	MSGF	374	Sequest	308	Crux	137
403272224	5	Maxquant	180	Mascot	410	MSGF	375	Sequest	309	Crux	138
403272236	5	Maxquant	181	Mascot	412	MSGF	376	Sequest	310	Crux	139
403272418	5	Maxquant	182	Mascot	418	MSGF	380	Sequest	312	Crux	140
403272423	5	Maxquant	183	Mascot	419	MSGF	381	Sequest	313	Crux	141
403272475	5	Maxquant	184	Mascot	420	MSGF	382	Sequest	314	Crux	142
403272691	5	Maxquant	185	Mascot	426	MSGF	387	Sequest	318	Crux	144
403274088	5	Maxquant	192	Mascot	451	MSGF	413	Sequest	336	Crux	149
403274126	5	Maxquant	193	Mascot	453	MSGF	414	Sequest	337	Crux	150
403274646	5	Maxquant	196	Mascot	464	MSGF	422	Sequest	344	Crux	153
403274773	5	Maxquant	198	Mascot	468	MSGF	424	Sequest	348	Crux	155
403275279	5	Maxquant	203	Mascot	485	MSGF	435	Sequest	357	Crux	159
403275583	5	Maxquant	205	Mascot	498	MSGF	440	Sequest	360	Crux	161
403275850	5	Maxquant	206	Mascot	502	MSGF	442	Sequest	363	Crux	163
403276785	5	Maxquant	210	Mascot	517	MSGF	458	Sequest	374	Crux	166
403276810	5	Maxquant	211	Mascot	518	MSGF	460	Sequest	376	Crux	167
403277017	5	Maxquant	215	Mascot	522	MSGF	464	Sequest	379	Crux	168
403277103	5	Maxquant	216	Mascot	524	MSGF	465	Sequest	381	Crux	169
403277252	5	Maxquant	217	Mascot	529	MSGF	467	Sequest	383	Crux	171
403277265	5	Maxquant	218	Mascot	530	MSGF	468	Sequest	384	Crux	172
403278020	5	Maxquant	222	Mascot	542	MSGF	481	Sequest	395	Crux	176
403278071	5	Maxquant	223	Mascot	545	MSGF	484	Sequest	397	Crux	178
403278155	5	Maxquant	224	Mascot	547	MSGF	485	Sequest	398	Crux	179
403278437	5	Maxquant	225	Mascot	554	MSGF	490	Sequest	403	Crux	180
403278922	5	Maxquant	227	Mascot	565	MSGF	501	Sequest	410	Crux	182
403279429	5	Maxquant	231	Mascot	576	MSGF	512	Sequest	418	Crux	186
403279661	5	Maxquant	232	Mascot	578	MSGF	515	Sequest	421	Crux	187
403279712	5	Maxquant	233	Mascot	580	MSGF	516	Sequest	422	Crux	188
403279786	5	Maxquant	235	Mascot	582	MSGF	520	Sequest	425	Crux	189
403279806	5	Maxquant	236	Mascot	584	MSGF	521	Sequest	426	Crux	190
403279865	5	Maxquant	237	Mascot	585	MSGF	525	Sequest	428	Crux	191
403280374	5	Maxquant	240	Mascot	598	MSGF	533	Sequest	436	Crux	194
403280504	5	Maxquant	242	Mascot	604	MSGF	534	Sequest	439	Crux	197
403281161	5	Maxquant	246	Mascot	618	MSGF	546	Sequest	446	Crux	199
403281226	5	Maxquant	248	Mascot	621	MSGF	549	Sequest	449	Crux	200
403281345	5	Maxquant	249	Mascot	624	MSGF	552	Sequest	452	Crux	202
403281827	5	Maxquant	252	Mascot	631	MSGF	561	Sequest	456	Crux	204
403281834	5	Maxquant	253	Mascot	632	MSGF	562	Sequest	457	Crux	205
403282075	5	Maxquant	256	Mascot	634	MSGF	566	Sequest	461	Crux	206
403282203	5	Maxquant	258	Mascot	638	MSGF	569	Sequest	463	Crux	207
403282935	5	Maxquant	262	Mascot	647	MSGF	580	Sequest	474	Crux	210
403282980	5	Maxquant	263	Mascot	651	MSGF	582	Sequest	476	Crux	211
403283024	5	Maxquant	264	Mascot	653	MSGF	584	Sequest	478	Crux	212
403283045	5	Maxquant	265	Mascot	654	MSGF	585	Sequest	479	Crux	213
403283098	5	Maxquant	266	Mascot	656	MSGF	586	Sequest	480	Crux	214
403283222	5	Maxquant	270	Mascot	663	MSGF	591	Sequest	485	Crux	216
403284158	5	Maxquant	276	Mascot	676	MSGF	599	Sequest	498	Crux	217
403284310	5	Maxquant	278	Mascot	678	MSGF	602	Sequest	501	Crux	218
403284823	5	Maxquant	280	Mascot	686	MSGF	613	Sequest	505	Crux	221
403284970	5	Maxquant	281	Mascot	688	MSGF	617	Sequest	508	Crux	222
403285333	5	Maxquant	284	Mascot	698	MSGF	622	Sequest	515	Crux	224
403285553	5	Maxquant	285	Mascot	703	MSGF	626	Sequest	517	Crux	225
403285754	5	Maxquant	287	Mascot	706	MSGF	629	Sequest	520	Crux	226
403285760	5	Maxquant	288	Mascot	707	MSGF	630	Sequest	521	Crux	227
403286230	5	Maxquant	289	Mascot	717	MSGF	633	Sequest	525	Crux	228
403286372	5	Maxquant	290	Mascot	720	MSGF	637	Sequest	528	Crux	230
403286483	5	Maxquant	291	Mascot	721	MSGF	639	Sequest	529	Crux	231
403286685	5	Maxquant	292	Mascot	722	MSGF	641	Sequest	531	Crux	232
403286956	5	Maxquant	294	Mascot	725	MSGF	644	Sequest	533	Crux	234
403287522	5	Maxquant	298	Mascot	736	MSGF	651	Sequest	537	Crux	235
403287667	5	Maxquant	299	Mascot	740	MSGF	656	Sequest	542	Crux	237
403287718	5	Maxquant	300	Mascot	744	MSGF	658	Sequest	544	Crux	239
403288056	5	Maxquant	303	Mascot	753	MSGF	664	Sequest	553	Crux	241
403288246	5	Maxquant	306	Mascot	758	MSGF	665	Sequest	556	Crux	243
403288344	5	Maxquant	307	Mascot	761	MSGF	668	Sequest	562	Crux	244
403288386	5	Maxquant	308	Mascot	762	MSGF	669	Sequest	564	Crux	245
403288628	5	Maxquant	311	Mascot	766	MSGF	671	Sequest	565	Crux	246
403288713	5	Maxquant	313	Mascot	769	MSGF	673	Sequest	568	Crux	247
403289010	5	Maxquant	315	Mascot	773	MSGF	675	Sequest	571	Crux	249
403289391	5	Maxquant	317	Mascot	779	MSGF	681	Sequest	577	Crux	251
403289917	5	Maxquant	319	Mascot	792	MSGF	687	Sequest	584	Crux	252
403290028	5	Maxquant	320	Mascot	794	MSGF	689	Sequest	586	Crux	253
403290297	5	Maxquant	322	Mascot	801	MSGF	696	Sequest	592	Crux	257
403290732	5	Maxquant	323	Mascot	808	MSGF	702	Sequest	594	Crux	259
403291047	5	Maxquant	324	Mascot	812	MSGF	707	Sequest	597	Crux	260
403291258	5	Maxquant	326	Mascot	820	MSGF	709	Sequest	599	Crux	261
403291609	5	Maxquant	328	Mascot	830	MSGF	715	Sequest	604	Crux	262
403291654	5	Maxquant	329	Mascot	831	MSGF	716	Sequest	605	Crux	263
403291932	5	Maxquant	330	Mascot	835	MSGF	720	Sequest	607	Crux	264
403292029	5	Maxquant	331	Mascot	838	MSGF	721	Sequest	608	Crux	265
403292200	5	Maxquant	333	Mascot	845	MSGF	728	Sequest	614	Crux	266
403292351	5	Maxquant	335	Mascot	847	MSGF	732	Sequest	616	Crux	267
403292482	5	Maxquant	340	Mascot	856	MSGF	737	Sequest	619	Crux	269
403292616	5	Maxquant	341	Mascot	862	MSGF	741	Sequest	621	Crux	271
403292722	5	Maxquant	342	Mascot	864	MSGF	742	Sequest	622	Crux	272
403293111	5	Maxquant	344	Mascot	872	MSGF	751	Sequest	627	Crux	274
403293319	5	Maxquant	346	Mascot	876	MSGF	755	Sequest	632	Crux	276
403293515	5	Maxquant	347	Mascot	881	MSGF	758	Sequest	636	Crux	277
403293940	5	Maxquant	351	Mascot	891	MSGF	763	Sequest	643	Crux	279
403294115	5	Maxquant	352	Mascot	893	MSGF	767	Sequest	646	Crux	281
403294125	5	Maxquant	353	Mascot	894	MSGF	768	Sequest	647	Crux	282
403294184	5	Maxquant	354	Mascot	895	MSGF	769	Sequest	648	Crux	283
403294193	5	Maxquant	355	Mascot	896	MSGF	770	Sequest	649	Crux	284
403295268	5	Maxquant	362	Mascot	912	MSGF	788	Sequest	661	Crux	287
403295889	5	Maxquant	365	Mascot	925	MSGF	797	Sequest	668	Crux	289
403296075	5	Maxquant	366	Mascot	926	MSGF	799	Sequest	670	Crux	290
403296087	5	Maxquant	367	Mascot	927	MSGF	801	Sequest	672	Crux	291
403296279	5	Maxquant	368	Mascot	933	MSGF	805	Sequest	677	Crux	293
403296395	5	Maxquant	370	Mascot	938	MSGF	809	Sequest	680	Crux	295
403296423	5	Maxquant	371	Mascot	940	MSGF	811	Sequest	682	Crux	296
403296725	5	Maxquant	376	Mascot	950	MSGF	819	Sequest	696	Crux	302
403296804	5	Maxquant	377	Mascot	953	MSGF	823	Sequest	701	Crux	304
403296959	5	Maxquant	379	Mascot	958	MSGF	827	Sequest	705	Crux	307
403297087	5	Maxquant	381	Mascot	963	MSGF	830	Sequest	709	Crux	308
403297103	5	Maxquant	382	Mascot	965	MSGF	833	Sequest	710	Crux	309
403297233	5	Maxquant	383	Mascot	967	MSGF	835	Sequest	712	Crux	310
403297375	5	Maxquant	386	Mascot	970	MSGF	838	Sequest	717	Crux	311
403298226	5	Maxquant	391	Mascot	981	MSGF	848	Sequest	725	Crux	314
403298315	5	Maxquant	392	Mascot	983	MSGF	850	Sequest	727	Crux	315
403298335	5	Maxquant	393	Mascot	984	MSGF	851	Sequest	730	Crux	316
403298789	5	Maxquant	398	Mascot	997	MSGF	861	Sequest	735	Crux	317
403299204	5	Maxquant	400	Mascot	1006	MSGF	868	Sequest	739	Crux	318
403299206	5	Maxquant	401	Mascot	1007	MSGF	869	Sequest	740	Crux	319
403299544	5	Maxquant	404	Mascot	1011	MSGF	875	Sequest	743	Crux	320
403299826	5	Maxquant	405	Mascot	1019	MSGF	880	Sequest	747	Crux	322
403299948	5	Maxquant	406	Mascot	1021	MSGF	882	Sequest	750	Crux	324
403300207	5	Maxquant	408	Mascot	1028	MSGF	885	Sequest	756	Crux	325
403300479	5	Maxquant	409	Mascot	1030	MSGF	887	Sequest	759	Crux	326
403300735	5	Maxquant	415	Mascot	1035	MSGF	891	Sequest	764	Crux	327
403300789	5	Maxquant	416	Mascot	1037	MSGF	893	Sequest	765	Crux	328
403300845	5	Maxquant	418	Mascot	1039	MSGF	894	Sequest	767	Crux	329
403301105	5	Maxquant	420	Mascot	1044	MSGF	896	Sequest	769	Crux	331
403301300	5	Maxquant	421	Mascot	1053	MSGF	901	Sequest	772	Crux	332
403301997	5	Maxquant	425	Mascot	1065	MSGF	907	Sequest	778	Crux	333
403302244	5	Maxquant	428	Mascot	1075	MSGF	914	Sequest	787	Crux	335
403302934	5	Maxquant	435	Mascot	1090	MSGF	930	Sequest	803	Crux	337
403303596	5	Maxquant	438	Mascot	1110	MSGF	940	Sequest	812	Crux	338
403304272	5	Maxquant	443	Mascot	1122	MSGF	951	Sequest	825	Crux	339
403304663	5	Maxquant	447	Mascot	1131	MSGF	956	Sequest	835	Crux	341
403305068	5	Maxquant	449	Mascot	1142	MSGF	963	Sequest	842	Crux	343
403305292	5	Maxquant	453	Mascot	1149	MSGF	967	Sequest	850	Crux	345
403305628	5	Maxquant	457	Mascot	1154	MSGF	976	Sequest	857	Crux	347
403305721	5	Maxquant	458	Mascot	1158	MSGF	978	Sequest	860	Crux	348
403306195	5	Maxquant	460	Mascot	1162	MSGF	987	Sequest	864	Crux	349
403306300	5	Maxquant	462	Mascot	1165	MSGF	989	Sequest	869	Crux	350
403306707	5	Maxquant	464	Mascot	1172	MSGF	995	Sequest	871	Crux	351
403306887	5	Maxquant	466	Mascot	1174	MSGF	997	Sequest	873	Crux	352
403306997	5	Maxquant	470	Mascot	1181	MSGF	1003	Sequest	880	Crux	354
403308155	5	Maxquant	479	Mascot	1199	MSGF	1025	Sequest	898	Crux	358
403308488	5	Maxquant	482	Mascot	1210	MSGF	1031	Sequest	905	Crux	359
403308670	5	Maxquant	483	Mascot	1213	MSGF	1034	Sequest	908	Crux	360
403308988	5	Maxquant	485	Mascot	1218	MSGF	1041	Sequest	914	Crux	361
403309242	5	Maxquant	490	Mascot	1225	MSGF	1048	Sequest	920	Crux	362
403309549	5	Maxquant	493	Mascot	1231	MSGF	1051	Sequest	922	Crux	363
403254127	4	Maxquant	5	Mascot	9	MSGF	9	Crux	5
403254286	4	Mascot	13	MSGF	11	Sequest	7	Crux	6
403254455	4	Maxquant	11	Mascot	17	MSGF	17	Sequest	12
403254548	4	Maxquant	12	Mascot	18	MSGF	19	Sequest	13
403254569	4	Maxquant	13	Mascot	20	MSGF	21	Crux	10
403254695	4	Maxquant	15	Mascot	21	MSGF	24	Sequest	16
403255345	4	Mascot	29	MSGF	32	Sequest	23	Crux	13
403255631	4	Mascot	37	MSGF	37	Sequest	29	Crux	16
403255639	4	Maxquant	21	Mascot	38	MSGF	38	Sequest	30
403255891	4	Maxquant	26	Mascot	44	MSGF	43	Sequest	34
403256025	4	Maxquant	27	Mascot	46	MSGF	46	Crux	20
403256303	4	Mascot	54	MSGF	52	Sequest	43	Crux	23
403256659	4	Mascot	61	MSGF	59	Sequest	47	Crux	27
403256689	4	Mascot	62	MSGF	60	Sequest	48	Crux	28
403256877	4	Mascot	67	MSGF	65	Sequest	53	Crux	31
403257138	4	Mascot	74	MSGF	72	Sequest	56	Crux	34
403257384	4	Mascot	77	MSGF	74	Sequest	58	Crux	35
403257493	4	Maxquant	39	Mascot	81	MSGF	78	Sequest	63
403258685	4	Maxquant	46	Mascot	111	MSGF	98	Sequest	79
403259194	4	Maxquant	49	Mascot	120	MSGF	103	Sequest	83
403259209	4	Mascot	121	MSGF	104	Sequest	84	Crux	44
403259540	4	Maxquant	55	Mascot	129	MSGF	113	Sequest	89
403259929	4	Maxquant	59	Mascot	137	MSGF	120	Crux	50
403259987	4	Mascot	140	MSGF	122	Sequest	96	Crux	52
403260468	4	Maxquant	64	Mascot	151	MSGF	130	Sequest	104
403260564	4	Maxquant	68	Mascot	156	MSGF	136	Crux	58
403260664	4	Mascot	162	MSGF	141	Sequest	113	Crux	61
403260765	4	Maxquant	75	Mascot	165	MSGF	144	Sequest	116
403260836	4	Maxquant	77	Mascot	166	MSGF	147	Sequest	117
403261487	4	Mascot	175	MSGF	158	Sequest	123	Crux	63
403261570	4	Maxquant	79	Mascot	178	MSGF	161	Sequest	125
403261818	4	Mascot	186	MSGF	169	Sequest	130	Crux	66
403262069	4	Maxquant	87	Mascot	197	MSGF	179	Sequest	136
403262289	4	Maxquant	88	Mascot	198	MSGF	181	Sequest	137
403262584	4	Maxquant	90	Mascot	202	Sequest	139	Crux	73
403262701	4	Maxquant	91	Mascot	205	MSGF	186	Sequest	142
403262996	4	Mascot	212	MSGF	194	Sequest	145	Crux	77
403263183	4	Maxquant	94	Mascot	215	MSGF	196	Sequest	148
403263301	4	Maxquant	98	Mascot	222	MSGF	199	Sequest	151
403264672	4	Maxquant	109	Mascot	251	MSGF	224	Sequest	177
403265201	4	Mascot	261	MSGF	230	Sequest	192	Crux	90
403265212	4	Maxquant	113	Mascot	262	MSGF	232	Crux	91
403265302	4	Maxquant	115	Mascot	265	MSGF	235	Sequest	197
403265362	4	Mascot	267	MSGF	237	Sequest	200	Crux	93
403265503	4	Maxquant	117	Mascot	273	MSGF	239	Sequest	201
403265830	4	Maxquant	119	Mascot	275	Sequest	202	Crux	94
403266017	4	Maxquant	120	Mascot	277	MSGF	244	Sequest	204
403266081	4	Maxquant	121	Mascot	279	MSGF	247	Crux	95
403266091	4	Maxquant	122	Mascot	280	MSGF	248	Sequest	207
403266151	4	Maxquant	124	Mascot	283	MSGF	250	Sequest	209
403266933	4	Maxquant	132	Mascot	298	MSGF	262	Sequest	220
403267372	4	Maxquant	137	Mascot	308	MSGF	274	Crux	106
403267534	4	Maxquant	138	MSGF	278	Sequest	229	Crux	107
403267639	4	Mascot	311	MSGF	279	Sequest	230	Crux	108
403267688	4	Maxquant	139	Mascot	313	MSGF	281	Sequest	231
403268234	4	Maxquant	143	Mascot	324	MSGF	293	Sequest	236
403268767	4	Maxquant	151	Mascot	334	MSGF	303	Sequest	245
403270695	4	Maxquant	164	Mascot	371	MSGF	338	Sequest	273
403270730	4	Maxquant	166	MSGF	343	Sequest	277	Crux	128
403270744	4	Maxquant	167	Mascot	375	MSGF	344	Sequest	278
403270752	4	Maxquant	168	Mascot	376	MSGF	345	Sequest	279
403271001	4	Maxquant	169	Mascot	380	MSGF	348	Sequest	283
403271326	4	Mascot	389	MSGF	354	Sequest	292	Crux	132
403271576	4	Maxquant	175	Mascot	395	MSGF	359	Sequest	297
403271624	4	Maxquant	176	Mascot	397	MSGF	362	Sequest	299
403272146	4	Mascot	408	MSGF	372	Sequest	307	Crux	136
403272869	4	Maxquant	186	Mascot	431	MSGF	392	Sequest	322
403272916	4	Maxquant	187	Mascot	432	MSGF	394	Sequest	323
403273028	4	Mascot	434	MSGF	396	Sequest	325	Crux	145
403273162	4	Mascot	438	MSGF	400	Sequest	326	Crux	146
403273674	4	Mascot	444	MSGF	406	Sequest	331	Crux	148
403274563	4	Maxquant	195	Mascot	463	MSGF	421	Sequest	343
403274674	4	Maxquant	197	Mascot	467	MSGF	423	Crux	154
403274874	4	Maxquant	199	Mascot	472	MSGF	426	Crux	156
403275034	4	Mascot	476	MSGF	428	Sequest	353	Crux	157
403275058	4	Mascot	477	MSGF	430	Sequest	354	Crux	158
403275526	4	Maxquant	204	Mascot	495	MSGF	438	Sequest	359
403275929	4	Maxquant	207	Mascot	503	MSGF	445	Sequest	364
403278069	4	Mascot	544	MSGF	483	Sequest	396	Crux	177
403278448	4	Mascot	556	MSGF	491	Sequest	404	Crux	181
403278600	4	Maxquant	226	Mascot	559	MSGF	493	Sequest	409
403279403	4	Maxquant	229	Mascot	573	Sequest	415	Crux	184
403279422	4	Maxquant	230	Mascot	575	MSGF	510	Sequest	417
403279715	4	Maxquant	234	Mascot	581	MSGF	517	Sequest	423
403279965	4	Mascot	588	MSGF	526	Sequest	432	Crux	193
403279997	4	Maxquant	238	Mascot	589	MSGF	527	Sequest	433
403280067	4	Maxquant	239	Mascot	593	MSGF	530	Sequest	434
403280419	4	Maxquant	241	Mascot	601	Sequest	437	Crux	195
403280585	4	Maxquant	244	Mascot	605	MSGF	537	Sequest	440
403281186	4	Maxquant	247	Mascot	619	MSGF	548	Sequest	448
403281645	4	Maxquant	251	Mascot	629	Sequest	453	Crux	203
403282009	4	Maxquant	255	Mascot	633	MSGF	565	Sequest	460
403282096	4	Maxquant	257	Mascot	635	MSGF	567	Sequest	462
403282533	4	Maxquant	260	Mascot	642	MSGF	572	Sequest	469
403282543	4	Mascot	643	MSGF	573	Sequest	470	Crux	209
403283210	4	Maxquant	267	Mascot	661	MSGF	589	Sequest	482
403283212	4	Maxquant	268	Mascot	662	MSGF	590	Sequest	483
403283316	4	Maxquant	272	Mascot	667	MSGF	593	Sequest	487
403284006	4	Maxquant	274	Mascot	673	MSGF	597	Sequest	496
403284168	4	Maxquant	277	Mascot	677	MSGF	600	Sequest	499
403286248	4	Mascot	718	MSGF	636	Sequest	527	Crux	229
403287000	4	Maxquant	295	Mascot	726	MSGF	646	Sequest	534
403287204	4	Maxquant	296	Mascot	731	MSGF	648	Sequest	535
403287684	4	Mascot	741	MSGF	657	Sequest	543	Crux	238
403287831	4	Maxquant	301	Mascot	747	MSGF	659	Sequest	545
403287969	4	Mascot	750	MSGF	660	Sequest	549	Crux	240
403287971	4	Maxquant	302	Mascot	751	MSGF	661	Sequest	550
403288124	4	Maxquant	305	Mascot	757	Sequest	555	Crux	242
403288679	4	Maxquant	312	Mascot	767	MSGF	672	Sequest	567
403290336	4	Mascot	802	MSGF	697	Sequest	593	Crux	258
403291397	4	Maxquant	327	Mascot	825	MSGF	712	Sequest	602
403292111	4	Maxquant	332	Mascot	844	MSGF	727	Sequest	612
403292317	4	Maxquant	334	Mascot	846	MSGF	731	Sequest	615
403292410	4	Mascot	849	MSGF	734	Sequest	617	Crux	268
403292441	4	Maxquant	338	Mascot	852	MSGF	735	Sequest	618
403292510	4	Mascot	858	MSGF	738	Sequest	620	Crux	270
403292850	4	Mascot	869	MSGF	744	Sequest	624	Crux	273
403293293	4	Maxquant	345	Mascot	874	Sequest	630	Crux	275
403293591	4	Maxquant	349	Mascot	883	MSGF	760	Sequest	638
403293675	4	Maxquant	350	Mascot	886	MSGF	761	Crux	278
403294104	4	Mascot	892	MSGF	765	Sequest	645	Crux	280
403294199	4	Maxquant	356	Mascot	897	MSGF	771	Sequest	650
403294667	4	Mascot	904	MSGF	779	Sequest	658	Crux	285
403295087	4	Maxquant	360	Mascot	908	MSGF	783	Crux	286
403295628	4	Mascot	921	MSGF	794	Sequest	665	Crux	288
403295709	4	Maxquant	363	Mascot	922	MSGF	795	Sequest	666
403296275	4	Mascot	932	MSGF	804	Sequest	676	Crux	292
403296341	4	Maxquant	369	Mascot	936	MSGF	806	Sequest	678
403296709	4	Mascot	946	MSGF	815	Sequest	688	Crux	299
403296711	4	Maxquant	375	MSGF	816	Sequest	689	Crux	300
403296723	4	Mascot	949	MSGF	818	Sequest	695	Crux	301
403296760	4	Mascot	952	MSGF	822	Sequest	700	Crux	303
403296953	4	Mascot	956	MSGF	825	Sequest	703	Crux	305
403296955	4	Mascot	957	MSGF	826	Sequest	704	Crux	306
403297235	4	Maxquant	384	Mascot	968	MSGF	836	Sequest	713
403297989	4	Maxquant	388	Mascot	975	MSGF	843	Crux	313
403298630	4	Maxquant	395	Mascot	991	MSGF	859	Sequest	732
403299538	4	Maxquant	403	Mascot	1010	MSGF	874	Sequest	742
403299758	4	Mascot	1017	MSGF	879	Sequest	745	Crux	321
403300546	4	Maxquant	411	Mascot	1032	MSGF	889	Sequest	760
403302074	4	Maxquant	427	Mascot	1070	MSGF	910	Sequest	782
403302191	4	Mascot	1074	MSGF	912	Sequest	785	Crux	334
403302262	4	Maxquant	429	Mascot	1076	MSGF	917	Sequest	789
403302565	4	Maxquant	430	Mascot	1081	MSGF	923	Sequest	790
403302644	4	Maxquant	431	Mascot	1083	MSGF	925	Sequest	794
403302671	4	Maxquant	432	Mascot	1084	MSGF	926	Sequest	795
403302781	4	Maxquant	433	Mascot	1087	MSGF	927	Sequest	797
403303083	4	Maxquant	436	Mascot	1097	MSGF	934	Sequest	805
403303160	4	Maxquant	437	Mascot	1100	MSGF	936	Sequest	807
403303658	4	Maxquant	439	Mascot	1112	MSGF	943	Sequest	815
403304602	4	Maxquant	446	Mascot	1129	MSGF	955	Sequest	834
403304689	4	Mascot	1132	MSGF	957	Sequest	837	Crux	342
403304913	4	Maxquant	448	Mascot	1137	MSGF	960	Sequest	839
403305233	4	Maxquant	451	Mascot	1147	MSGF	966	Sequest	846
403305326	4	Maxquant	454	Mascot	1150	MSGF	969	Sequest	852
403305602	4	Maxquant	456	Mascot	1153	MSGF	975	Crux	346
403306660	4	Maxquant	463	Mascot	1171	MSGF	994	Sequest	870
403306920	4	Maxquant	468	Mascot	1176	MSGF	1000	Sequest	876
403306978	4	Maxquant	469	Mascot	1179	MSGF	1002	Sequest	879
403307567	4	Maxquant	472	Mascot	1187	MSGF	1013	Crux	355
403307812	4	Maxquant	475	Mascot	1191	MSGF	1018	Sequest	891
403308360	4	Maxquant	480	Mascot	1206	MSGF	1029	Sequest	902
403308453	4	Maxquant	481	Mascot	1209	MSGF	1030	Sequest	904
403308699	4	Maxquant	484	Mascot	1214	MSGF	1036	Sequest	912
403309092	4	Maxquant	487	Mascot	1222	MSGF	1044	Sequest	918
403309186	4	Maxquant	488	Mascot	1223	MSGF	1047	Sequest	919
>PVP01_0102700.1-p1	4	Maxquant	501	Mascot	1262	MSGF	1081	Crux	369
>PVP01_0103700.1-p1	4	Maxquant	502	Mascot	1263	MSGF	1082	Crux	370
>PVP01_0108700.1-p1	4	Maxquant	508	Mascot	1271	MSGF	1091	Crux	371
>PVP01_0110100.1-p1	4	Maxquant	510	Mascot	1274	MSGF	1095	Crux	372
>PVP01_0112000.1-p1	4	Maxquant	512	Mascot	1277	MSGF	1098	Crux	373
>PVP01_0112500.1-p1	4	Maxquant	515	Mascot	1279	MSGF	1101	Crux	374
>PVP01_0113600.1-p1	4	Maxquant	517	Mascot	1281	MSGF	1105	Crux	375
>PVP01_0116400.1-p1	4	Maxquant	518	Mascot	1284	MSGF	1107	Crux	376
>PVP01_0119200.1-p1	4	Maxquant	521	Mascot	1291	MSGF	1111	Crux	377
>PVP01_0119400.1-p1	4	Maxquant	522	Mascot	1292	MSGF	1112	Crux	378
>PVP01_0201100.1-p1	4	Maxquant	523	Mascot	1293	MSGF	1114	Crux	379
>PVP01_0201200.1-p1	4	Maxquant	524	Mascot	1294	MSGF	1115	Crux	380
>PVP01_0201500.1-p1	4	Maxquant	525	Mascot	1295	MSGF	1116	Crux	381
>PVP01_0201600.1-p1	4	Maxquant	526	Mascot	1296	MSGF	1117	Crux	382
>PVP01_0201800.1-p1	4	Maxquant	528	Mascot	1297	MSGF	1119	Crux	383
>PVP01_0201900.1-p1	4	Maxquant	529	Mascot	1298	MSGF	1120	Crux	384
>PVP01_0203200.1-p1	4	Maxquant	531	Mascot	1300	MSGF	1122	Crux	385
>PVP01_0204400.1-p1	4	Maxquant	532	Mascot	1302	MSGF	1124	Crux	386
>PVP01_0206900.1-p1	4	Maxquant	534	Mascot	1306	MSGF	1126	Crux	387
>PVP01_0208500.1-p1	4	Maxquant	535	Mascot	1308	MSGF	1127	Crux	388
>PVP01_0211800.1-p1	4	Maxquant	536	Mascot	1312	MSGF	1133	Crux	390
>PVP01_0213700.1-p1	4	Maxquant	538	Mascot	1318	MSGF	1138	Crux	391
>PVP01_0300700.1-p1	4	Maxquant	542	Mascot	1325	MSGF	1146	Crux	393
>PVP01_0301500.1-p1	4	Maxquant	543	Mascot	1327	MSGF	1147	Crux	394
>PVP01_0305500.1-p1	4	Maxquant	544	Mascot	1329	MSGF	1151	Crux	396
>PVP01_0305600.1-p1	4	Maxquant	545	Mascot	1330	MSGF	1152	Crux	397
>PVP01_0305700.1-p1	4	Maxquant	546	Mascot	1331	MSGF	1153	Crux	398
>PVP01_0313500.1-p1	4	Maxquant	550	Mascot	1338	MSGF	1162	Crux	400
>PVP01_0315300.1-p1	4	Maxquant	551	Mascot	1339	MSGF	1164	Crux	402
>PVP01_0315400.1-p1	4	Maxquant	552	Mascot	1340	MSGF	1165	Crux	403
>PVP01_0316800.1-p1	4	Maxquant	553	Mascot	1341	MSGF	1168	Crux	404
>PVP01_0317100.1-p1	4	Maxquant	554	Mascot	1342	MSGF	1169	Crux	405
>PVP01_0317300.1-p1	4	Maxquant	555	Mascot	1343	MSGF	1170	Crux	406
>PVP01_0318900.1-p1	4	Maxquant	557	Mascot	1345	MSGF	1172	Crux	407
>PVP01_0405000.1-p1	4	Maxquant	558	Mascot	1348	MSGF	1178	Crux	409
>PVP01_0407900.1-p1	4	Maxquant	560	Mascot	1353	MSGF	1183	Crux	411
>PVP01_0409300.1-p1	4	Maxquant	561	Mascot	1356	MSGF	1185	Crux	412
>PVP01_0409900.1-p1	4	Maxquant	562	Mascot	1357	MSGF	1186	Crux	413
>PVP01_0410900.1-p1	4	Maxquant	563	Mascot	1358	MSGF	1187	Crux	414
>PVP01_0411800.1-p1	4	Maxquant	564	Mascot	1359	MSGF	1189	Crux	415
>PVP01_0413100.1-p1	4	Maxquant	565	Mascot	1360	MSGF	1190	Crux	416
>PVP01_0414800.1-p1	4	Maxquant	567	Mascot	1363	MSGF	1192	Crux	418
>PVP01_0415000.1-p1	4	Maxquant	568	Mascot	1364	MSGF	1193	Crux	419
>PVP01_0415400.1-p1	4	Maxquant	569	Mascot	1365	MSGF	1194	Crux	420
>PVP01_0417000.1-p1	4	Maxquant	570	Mascot	1367	MSGF	1197	Crux	422
>PVP01_0417200.1-p1	4	Maxquant	572	Mascot	1368	MSGF	1198	Crux	423
>PVP01_0417300.1-p1	4	Maxquant	573	Mascot	1369	MSGF	1199	Crux	424
>PVP01_0417600.1-p1	4	Maxquant	574	Mascot	1371	MSGF	1201	Crux	425
>PVP01_0417800.1-p1	4	Maxquant	576	Mascot	1373	MSGF	1202	Crux	426
>PVP01_0419200.1-p1	4	Maxquant	577	Mascot	1375	MSGF	1205	Crux	427
>PVP01_0420400.1-p1	4	Maxquant	578	Mascot	1376	MSGF	1206	Crux	428
>PVP01_0422600.1-p1	4	Maxquant	580	Mascot	1380	MSGF	1209	Crux	430
>PVP01_0422800.1-p1	4	Maxquant	581	Mascot	1381	MSGF	1210	Crux	431
>PVP01_0423000.1-p1	4	Maxquant	582	Mascot	1382	MSGF	1211	Crux	432
>PVP01_0423300.1-p1	4	Maxquant	583	Mascot	1383	MSGF	1212	Crux	433
>PVP01_0503800.1-p1	4	Maxquant	584	Mascot	1384	MSGF	1218	Crux	434
>PVP01_0507600.1-p1	4	Maxquant	586	Mascot	1386	MSGF	1221	Crux	435
>PVP01_0510500.1-p1	4	Maxquant	589	Mascot	1392	MSGF	1226	Crux	436
>PVP01_0511700.1-p1	4	Maxquant	590	Mascot	1394	MSGF	1228	Crux	437
>PVP01_0514400.1-p1	4	Maxquant	593	Mascot	1399	MSGF	1232	Crux	440
>PVP01_0515400.1-p1	4	Maxquant	594	Mascot	1401	MSGF	1234	Crux	441
>PVP01_0517600.1-p1	4	Maxquant	596	Mascot	1403	MSGF	1236	Crux	443
>PVP01_0517800.1-p1	4	Maxquant	597	Mascot	1404	MSGF	1237	Crux	444
>PVP01_0518700.1-p1	4	Maxquant	598	Mascot	1405	MSGF	1238	Crux	445
>PVP01_0519700.1-p1	4	Maxquant	599	Mascot	1407	MSGF	1240	Crux	446
>PVP01_0521500.1-p1	4	Maxquant	601	Mascot	1410	MSGF	1243	Crux	447
>PVP01_0522400.1-p1	4	Maxquant	602	Mascot	1414	MSGF	1245	Crux	448
>PVP01_0526200.1-p1	4	Maxquant	603	Mascot	1419	MSGF	1247	Crux	450
>PVP01_0526400.1-p1	4	Maxquant	604	Mascot	1420	MSGF	1248	Crux	451
>PVP01_0527600.1-p1	4	Maxquant	605	Mascot	1424	MSGF	1253	Crux	452
>PVP01_0529000.1-p1	4	Maxquant	606	Mascot	1426	MSGF	1254	Crux	453
>PVP01_0530800.1-p1	4	Maxquant	607	Mascot	1429	MSGF	1256	Crux	454
>PVP01_0532900.1-p1	4	Maxquant	610	Mascot	1432	MSGF	1260	Crux	457
>PVP01_0600900.1-p1	4	Maxquant	612	Mascot	1435	MSGF	1263	Crux	458
>PVP01_0601200.1-p1	4	Maxquant	613	Mascot	1436	MSGF	1264	Crux	459
>PVP01_0601500.1-p1	4	Maxquant	614	Mascot	1437	MSGF	1266	Crux	460
>PVP01_0606100.1-p1	4	Maxquant	617	Mascot	1442	MSGF	1273	Crux	462
>PVP01_0607700.1-p1	4	Maxquant	620	Mascot	1446	MSGF	1277	Crux	465
>PVP01_0610000.1-p1	4	Maxquant	621	Mascot	1447	MSGF	1278	Crux	466
>PVP01_0610500.1-p1	4	Maxquant	622	Mascot	1448	MSGF	1279	Crux	467
>PVP01_0611900.1-p1	4	Maxquant	623	Mascot	1449	MSGF	1280	Crux	468
>PVP01_0612400.1-p1	4	Maxquant	624	Mascot	1450	MSGF	1281	Crux	469
>PVP01_0612900.1-p1	4	Maxquant	625	Mascot	1451	MSGF	1282	Crux	470
>PVP01_0614700.1-p1	4	Maxquant	626	Mascot	1452	MSGF	1283	Crux	471
>PVP01_0615600.1-p1	4	Maxquant	627	Mascot	1453	MSGF	1284	Crux	472
>PVP01_0618500.1-p1	4	Maxquant	629	Mascot	1455	MSGF	1286	Crux	473
>PVP01_0620800.1-p1	4	Maxquant	633	Mascot	1457	MSGF	1288	Crux	474
>PVP01_0620900.1-p1	4	Maxquant	634	Mascot	1458	MSGF	1289	Crux	475
>PVP01_0621700.1-p1	4	Maxquant	635	Mascot	1459	MSGF	1290	Crux	476
>PVP01_0623100.1-p1	4	Maxquant	637	Mascot	1464	MSGF	1292	Crux	477
>PVP01_0623800.1-p1	4	Maxquant	638	Mascot	1465	MSGF	1293	Crux	478
>PVP01_0701600.1-p1	4	Maxquant	640	Mascot	1467	MSGF	1298	Crux	479
>PVP01_0702100.1-p1	4	Maxquant	641	Mascot	1469	MSGF	1300	Crux	480
>PVP01_0703200.1-p1	4	Maxquant	645	Mascot	1474	MSGF	1306	Crux	481
>PVP01_0703300.1-p1	4	Maxquant	646	Mascot	1475	MSGF	1307	Crux	482
>PVP01_0703800.1-p1	4	Maxquant	647	Mascot	1476	MSGF	1308	Crux	483
>PVP01_0705800.1-p1	4	Maxquant	648	Mascot	1479	MSGF	1311	Crux	484
>PVP01_0706200.1-p1	4	Maxquant	649	Mascot	1480	MSGF	1313	Crux	485
>PVP01_0710400.1-p1	4	Maxquant	651	Mascot	1487	MSGF	1322	Crux	486
>PVP01_0711800.1-p1	4	Maxquant	655	Mascot	1491	MSGF	1329	Crux	487
>PVP01_0712600.1-p1	4	Maxquant	656	Mascot	1492	MSGF	1330	Crux	488
>PVP01_0713800.1-p1	4	Maxquant	658	Mascot	1494	MSGF	1332	Crux	489
>PVP01_0716300.1-p1	4	Maxquant	659	Mascot	1498	MSGF	1334	Crux	490
>PVP01_0716400.1-p1	4	Maxquant	660	Mascot	1499	MSGF	1335	Crux	491
>PVP01_0716700.1-p1	4	Maxquant	661	Mascot	1500	MSGF	1336	Crux	492
>PVP01_0717400.1-p1	4	Maxquant	662	Mascot	1501	MSGF	1337	Crux	493
>PVP01_0720600.1-p1	4	Maxquant	666	Mascot	1509	MSGF	1344	Crux	494
>PVP01_0720700.1-p1	4	Maxquant	667	Mascot	1510	MSGF	1345	Crux	495
>PVP01_0721000.1-p1	4	Maxquant	668	Mascot	1511	MSGF	1346	Crux	496
>PVP01_0724400.1-p1	4	Maxquant	670	Mascot	1515	MSGF	1347	Crux	498
>PVP01_0727900.1-p1	4	Maxquant	672	Mascot	1519	MSGF	1352	Crux	500
>PVP01_0730900.1-p1	4	Maxquant	674	Mascot	1521	MSGF	1354	Crux	501
>PVP01_0731500.1-p1	4	Maxquant	675	Mascot	1522	MSGF	1355	Crux	502
>PVP01_0732300.1-p1	4	Maxquant	676	Mascot	1525	MSGF	1357	Crux	503
>PVP01_0733400.1-p1	4	Maxquant	678	Mascot	1528	MSGF	1359	Crux	504
>PVP01_0734300.1-p1	4	Maxquant	679	Mascot	1530	MSGF	1361	Crux	505
>PVP01_0735000.1-p1	4	Maxquant	680	Mascot	1531	MSGF	1362	Crux	506
>PVP01_0801100.1-p1	4	Maxquant	682	Mascot	1536	MSGF	1367	Crux	507
>PVP01_0801600.1-p1	4	Maxquant	683	Mascot	1537	MSGF	1368	Crux	508
>PVP01_0801700.1-p1	4	Maxquant	684	Mascot	1538	MSGF	1369	Crux	509
>PVP01_0803300.1-p1	4	Maxquant	686	Mascot	1540	MSGF	1371	Crux	510
>PVP01_0803500.1-p1	4	Maxquant	687	Mascot	1542	MSGF	1373	Crux	512
>PVP01_0803800.1-p1	4	Maxquant	688	Mascot	1544	MSGF	1375	Crux	514
>PVP01_0805200.1-p1	4	Maxquant	689	Mascot	1545	MSGF	1376	Crux	515
>PVP01_0805900.1-p1	4	Maxquant	690	Mascot	1547	MSGF	1377	Crux	516
>PVP01_0806500.1-p1	4	Maxquant	691	Mascot	1548	MSGF	1378	Crux	517
>PVP01_0807600.1-p1	4	Maxquant	692	Mascot	1551	MSGF	1382	Crux	519
>PVP01_0808100.1-p1	4	Maxquant	693	Mascot	1552	MSGF	1384	Crux	520
>PVP01_0808400.1-p1	4	Maxquant	694	Mascot	1553	MSGF	1385	Crux	521
>PVP01_0808600.1-p1	4	Maxquant	695	Mascot	1554	MSGF	1387	Crux	522
>PVP01_0808900.1-p1	4	Maxquant	696	Mascot	1555	MSGF	1388	Crux	523
>PVP01_0810800.1-p1	4	Maxquant	699	Mascot	1560	MSGF	1390	Crux	524
>PVP01_0811500.1-p1	4	Maxquant	700	Mascot	1561	MSGF	1391	Crux	525
>PVP01_0811900.1-p1	4	Maxquant	701	Mascot	1562	MSGF	1393	Crux	526
>PVP01_0812500.1-p1	4	Maxquant	702	Mascot	1563	MSGF	1394	Crux	527
>PVP01_0814200.1-p1	4	Maxquant	704	Mascot	1565	MSGF	1397	Crux	528
>PVP01_0815300.1-p1	4	Maxquant	705	Mascot	1567	MSGF	1400	Crux	530
>PVP01_0815700.1-p1	4	Maxquant	706	Mascot	1569	MSGF	1401	Crux	531
>PVP01_0816000.1-p1	4	Maxquant	707	Mascot	1570	MSGF	1402	Crux	532
>PVP01_0816400.1-p1	4	Maxquant	708	Mascot	1571	MSGF	1403	Crux	533
>PVP01_0817300.1-p1	4	Maxquant	711	Mascot	1573	MSGF	1406	Crux	534
>PVP01_0818200.1-p1	4	Maxquant	712	Mascot	1575	MSGF	1407	Crux	535
>PVP01_0819300.1-p1	4	Maxquant	713	Mascot	1576	MSGF	1408	Crux	536
>PVP01_0819400.1-p1	4	Maxquant	714	Mascot	1577	MSGF	1409	Crux	537
>PVP01_0819900.1-p1	4	Maxquant	715	Mascot	1579	MSGF	1411	Crux	538
>PVP01_0820100.1-p1	4	Maxquant	716	Mascot	1580	MSGF	1413	Crux	539
>PVP01_0822500.1-p1	4	Maxquant	718	Mascot	1583	MSGF	1416	Crux	540
>PVP01_0823300.1-p1	4	Maxquant	720	Mascot	1585	MSGF	1418	Crux	541
>PVP01_0825000.1-p1	4	Maxquant	723	Mascot	1589	MSGF	1421	Crux	542
>PVP01_0829900.1-p1	4	Maxquant	726	Mascot	1592	MSGF	1425	Crux	543
>PVP01_0830600.1-p1	4	Maxquant	727	Mascot	1594	MSGF	1428	Crux	544
>PVP01_0830700.1-p1	4	Maxquant	728	Mascot	1595	MSGF	1429	Crux	545
>PVP01_0832000.1-p1	4	Maxquant	730	Mascot	1598	MSGF	1432	Crux	546
>PVP01_0833000.1-p1	4	Maxquant	731	Mascot	1600	MSGF	1433	Crux	547
>PVP01_0833400.1-p1	4	Maxquant	734	Mascot	1603	MSGF	1436	Crux	548
>PVP01_0833800.1-p1	4	Maxquant	735	Mascot	1604	MSGF	1437	Crux	549
>PVP01_0834000.1-p1	4	Maxquant	737	Mascot	1606	MSGF	1439	Crux	550
>PVP01_0834500.1-p1	4	Maxquant	738	Mascot	1607	MSGF	1440	Crux	551
>PVP01_0837200.1-p1	4	Maxquant	740	Mascot	1612	MSGF	1448	Crux	552
>PVP01_0837300.1-p1	4	Maxquant	741	Mascot	1613	MSGF	1449	Crux	553
>PVP01_0838100.1-p1	4	Maxquant	742	Mascot	1614	MSGF	1451	Crux	554
>PVP01_0903900.1-p1	4	Maxquant	743	Mascot	1619	MSGF	1455	Crux	556
>PVP01_0905200.1-p1	4	Maxquant	746	Mascot	1623	MSGF	1458	Crux	557
>PVP01_0905800.1-p1	4	Maxquant	747	Mascot	1624	MSGF	1459	Crux	558
>PVP01_0905900.1-p1	4	Maxquant	748	Mascot	1625	MSGF	1460	Crux	559
>PVP01_0906200.1-p1	4	Maxquant	749	Mascot	1626	MSGF	1461	Crux	560
>PVP01_0906400.1-p1	4	Maxquant	750	Mascot	1627	MSGF	1462	Crux	561
>PVP01_0906600.1-p1	4	Maxquant	751	Mascot	1628	MSGF	1463	Crux	562
>PVP01_0909200.1-p1	4	Maxquant	753	Mascot	1630	MSGF	1465	Crux	563
>PVP01_0909400.1-p1	4	Maxquant	754	Mascot	1632	MSGF	1467	Crux	564
>PVP01_0909500.1-p1	4	Maxquant	755	Mascot	1633	MSGF	1468	Crux	565
>PVP01_0910700.1-p1	4	Maxquant	756	Mascot	1634	MSGF	1469	Crux	566
>PVP01_0911200.1-p1	4	Maxquant	757	Mascot	1635	MSGF	1470	Crux	567
>PVP01_0914200.1-p1	4	Maxquant	758	Mascot	1636	MSGF	1473	Crux	568
>PVP01_0916400.1-p1	4	Maxquant	760	Mascot	1639	MSGF	1477	Crux	569
>PVP01_0917000.1-p1	4	Maxquant	761	Mascot	1640	MSGF	1479	Crux	570
>PVP01_0917400.1-p1	4	Maxquant	762	Mascot	1641	MSGF	1481	Crux	571
>PVP01_0918300.1-p1	4	Maxquant	764	Mascot	1643	MSGF	1486	Crux	572
>PVP01_0918800.1-p1	4	Maxquant	765	Mascot	1644	MSGF	1487	Crux	573
>PVP01_0918900.1-p1	4	Maxquant	766	Mascot	1645	MSGF	1488	Crux	574
>PVP01_0920500.1-p1	4	Maxquant	767	Mascot	1647	MSGF	1491	Crux	575
>PVP01_0920700.1-p1	4	Maxquant	768	Mascot	1649	MSGF	1493	Crux	576
>PVP01_0922200.1-p1	4	Maxquant	769	Mascot	1652	MSGF	1494	Crux	577
>PVP01_0924000.1-p1	4	Maxquant	771	Mascot	1654	MSGF	1496	Crux	578
>PVP01_0924100.1-p1	4	Maxquant	772	Mascot	1655	MSGF	1497	Crux	579
>PVP01_0925200.1-p1	4	Maxquant	773	Mascot	1656	MSGF	1498	Crux	580
>PVP01_0925600.1-p1	4	Maxquant	774	Mascot	1659	MSGF	1500	Crux	581
>PVP01_0926900.1-p1	4	Maxquant	777	Mascot	1664	MSGF	1506	Crux	582
>PVP01_0927800.1-p1	4	Maxquant	778	Mascot	1665	MSGF	1508	Crux	583
>PVP01_0928300.1-p1	4	Maxquant	779	Mascot	1666	MSGF	1510	Crux	584
>PVP01_0928900.1-p1	4	Maxquant	780	Mascot	1668	MSGF	1511	Crux	585
>PVP01_0929700.1-p1	4	Maxquant	782	Mascot	1671	MSGF	1514	Crux	586
>PVP01_0930700.1-p1	4	Maxquant	784	Mascot	1674	MSGF	1516	Crux	587
>PVP01_0930800.1-p1	4	Maxquant	785	Mascot	1675	MSGF	1517	Crux	588
>PVP01_0931200.1-p1	4	Maxquant	786	Mascot	1676	MSGF	1518	Crux	589
>PVP01_0933000.1-p1	4	Maxquant	787	Mascot	1677	MSGF	1520	Crux	590
>PVP01_0933600.1-p1	4	Maxquant	788	Mascot	1679	MSGF	1521	Crux	591
>PVP01_0934200.1-p1	4	Maxquant	789	Mascot	1680	MSGF	1522	Crux	592
>PVP01_0934800.1-p1	4	Maxquant	790	Mascot	1681	MSGF	1524	Crux	593
>PVP01_0934900.1-p1	4	Maxquant	791	Mascot	1682	MSGF	1525	Crux	594
>PVP01_0935900.1-p1	4	Maxquant	792	Mascot	1683	MSGF	1527	Crux	595
>PVP01_0937200.1-p1	4	Maxquant	794	Mascot	1686	MSGF	1531	Crux	596
>PVP01_0937400.1-p1	4	Maxquant	795	Mascot	1687	MSGF	1532	Crux	597
>PVP01_0938300.1-p1	4	Maxquant	796	Mascot	1688	MSGF	1533	Crux	598
>PVP01_0939500.1-p1	4	Maxquant	798	Mascot	1692	MSGF	1535	Crux	599
>PVP01_0943200.1-p1	4	Maxquant	800	Mascot	1697	MSGF	1538	Crux	600
>PVP01_0944700.1-p1	4	Maxquant	803	Mascot	1700	MSGF	1542	Crux	601
>PVP01_0945800.1-p1	4	Maxquant	805	Mascot	1702	MSGF	1544	Crux	602
>PVP01_0946100.1-p1	4	Maxquant	806	Mascot	1703	MSGF	1545	Crux	603
>PVP01_0948700.1-p1	4	Maxquant	807	Mascot	1707	MSGF	1548	Crux	604
>PVP01_0949000.1-p1	4	Maxquant	808	Mascot	1708	MSGF	1550	Crux	605
>PVP01_1003700.1-p1	4	Maxquant	809	Mascot	1711	MSGF	1553	Crux	606
>PVP01_1005600.1-p1	4	Maxquant	810	Mascot	1712	MSGF	1555	Crux	607
>PVP01_1006300.1-p1	4	Maxquant	811	Mascot	1713	MSGF	1556	Crux	608
>PVP01_1006700.1-p1	4	Maxquant	813	Mascot	1715	MSGF	1558	Crux	609
>PVP01_1008700.1-p1	4	Maxquant	815	Mascot	1717	MSGF	1561	Crux	610
>PVP01_1013000.1-p1	4	Maxquant	819	Mascot	1724	MSGF	1566	Crux	611
>PVP01_1014500.1-p1	4	Maxquant	821	Mascot	1728	MSGF	1571	Crux	612
>PVP01_1016300.1-p1	4	Maxquant	823	Mascot	1731	MSGF	1577	Crux	613
>PVP01_1016700.1-p1	4	Maxquant	824	Mascot	1732	MSGF	1578	Crux	614
>PVP01_1017000.1-p1	4	Maxquant	825	Mascot	1733	MSGF	1579	Crux	615
>PVP01_1017100.1-p1	4	Maxquant	826	Mascot	1734	MSGF	1580	Crux	616
>PVP01_1017800.1-p1	4	Maxquant	827	Mascot	1735	MSGF	1581	Crux	617
>PVP01_1018100.1-p1	4	Maxquant	828	Mascot	1736	MSGF	1582	Crux	618
>PVP01_1018300.1-p1	4	Maxquant	829	Mascot	1737	MSGF	1583	Crux	619
>PVP01_1020600.1-p1	4	Maxquant	831	Mascot	1740	MSGF	1587	Crux	620
>PVP01_1023000.1-p1	4	Maxquant	835	Mascot	1744	MSGF	1591	Crux	621
>PVP01_1026200.1-p1	4	Maxquant	836	Mascot	1746	MSGF	1594	Crux	622
>PVP01_1026900.1-p1	4	Maxquant	838	Mascot	1751	MSGF	1597	Crux	624
>PVP01_1028200.1-p1	4	Maxquant	839	Mascot	1753	MSGF	1600	Crux	625
>PVP01_1031600.1-p1	4	Maxquant	843	Mascot	1762	MSGF	1607	Crux	626
>PVP01_1033400.1-p1	4	Maxquant	845	Mascot	1764	MSGF	1610	Crux	627
>PVP01_1033600.1-p1	4	Maxquant	846	Mascot	1765	MSGF	1611	Crux	628
>PVP01_1033900.1-p1	4	Maxquant	847	Mascot	1767	MSGF	1613	Crux	629
>PVP01_1101300.1-p1	4	Maxquant	848	Mascot	1769	MSGF	1616	Crux	631
>PVP01_1101700.1-p1	4	Maxquant	849	Mascot	1771	MSGF	1618	Crux	632
>PVP01_1103800.1-p1	4	Maxquant	850	Mascot	1773	MSGF	1622	Crux	633
>PVP01_1104300.1-p1	4	Maxquant	852	Mascot	1775	MSGF	1624	Crux	634
>PVP01_1105500.1-p1	4	Maxquant	853	Mascot	1778	MSGF	1626	Crux	635
>PVP01_1108100.1-p1	4	Maxquant	854	Mascot	1781	MSGF	1628	Crux	637
>PVP01_1110100.1-p1	4	Maxquant	855	Mascot	1782	MSGF	1630	Crux	638
>PVP01_1110200.1-p1	4	Maxquant	856	Mascot	1783	MSGF	1631	Crux	639
>PVP01_1111200.1-p1	4	Maxquant	858	Mascot	1785	MSGF	1634	Crux	640
>PVP01_1113100.1-p1	4	Maxquant	860	Mascot	1787	MSGF	1636	Crux	641
>PVP01_1114100.1-p1	4	Maxquant	863	Mascot	1789	MSGF	1639	Crux	642
>PVP01_1114800.1-p1	4	Maxquant	864	Mascot	1790	MSGF	1641	Crux	643
>PVP01_1116400.1-p1	4	Maxquant	865	Mascot	1791	MSGF	1642	Crux	644
>PVP01_1117800.1-p1	4	Maxquant	867	Mascot	1792	MSGF	1643	Crux	645
>PVP01_1120400.1-p1	4	Maxquant	868	Mascot	1795	MSGF	1647	Crux	646
>PVP01_1122700.1-p1	4	Maxquant	871	Mascot	1802	MSGF	1652	Crux	647
>PVP01_1122800.1-p1	4	Maxquant	872	Mascot	1803	MSGF	1653	Crux	648
>PVP01_1123500.1-p1	4	Maxquant	873	Mascot	1804	MSGF	1654	Crux	649
>PVP01_1125500.1-p1	4	Maxquant	874	Mascot	1806	MSGF	1657	Crux	650
>PVP01_1128300.1-p1	4	Maxquant	877	Mascot	1812	MSGF	1663	Crux	652
>PVP01_1130000.1-p1	4	Maxquant	879	Mascot	1815	MSGF	1665	Crux	653
>PVP01_1131000.1-p1	4	Maxquant	881	Mascot	1818	MSGF	1667	Crux	654
>PVP01_1131200.1-p1	4	Maxquant	882	Mascot	1819	MSGF	1668	Crux	655
>PVP01_1131900.1-p1	4	Maxquant	883	Mascot	1822	MSGF	1670	Crux	658
>PVP01_1132300.1-p1	4	Maxquant	884	Mascot	1823	MSGF	1671	Crux	659
>PVP01_1133100.1-p1	4	Maxquant	885	Mascot	1825	MSGF	1672	Crux	660
>PVP01_1135200.1-p1	4	Maxquant	887	Mascot	1828	MSGF	1674	Crux	661
>PVP01_1137000.1-p1	4	Maxquant	888	Mascot	1830	MSGF	1676	Crux	662
>PVP01_1138400.1-p1	4	Maxquant	889	Mascot	1831	MSGF	1677	Crux	663
>PVP01_1140100.1-p1	4	Maxquant	891	Mascot	1833	MSGF	1679	Crux	665
>PVP01_1142000.1-p1	4	Maxquant	893	Mascot	1838	MSGF	1682	Crux	666
>PVP01_1142200.1-p1	4	Maxquant	895	Mascot	1840	MSGF	1684	Crux	667
>PVP01_1142400.1-p1	4	Maxquant	896	Mascot	1841	MSGF	1686	Crux	668
>PVP01_1143000.1-p1	4	Maxquant	897	Mascot	1842	MSGF	1688	Crux	669
>PVP01_1147400.1-p1	4	Maxquant	898	Mascot	1846	MSGF	1692	Crux	671
>PVP01_1147500.1-p1	4	Maxquant	899	Mascot	1847	MSGF	1693	Crux	672
>PVP01_1201400.1-p1	4	Maxquant	901	Mascot	1850	MSGF	1697	Crux	673
>PVP01_1201600.1-p1	4	Maxquant	902	Mascot	1852	MSGF	1699	Crux	675
>PVP01_1201700.1-p1	4	Maxquant	903	Mascot	1853	MSGF	1700	Crux	676
>PVP01_1202300.1-p1	4	Maxquant	904	Mascot	1854	MSGF	1701	Crux	677
>PVP01_1203000.1-p1	4	Maxquant	905	Mascot	1855	MSGF	1702	Crux	678
>PVP01_1203200.1-p1	4	Maxquant	906	Mascot	1856	MSGF	1703	Crux	679
>PVP01_1203300.1-p1	4	Maxquant	907	Mascot	1857	MSGF	1704	Crux	680
>PVP01_1205600.1-p1	4	Maxquant	910	Mascot	1860	MSGF	1707	Crux	681
>PVP01_1205700.1-p1	4	Maxquant	911	Mascot	1861	MSGF	1708	Crux	682
>PVP01_1207300.1-p1	4	Maxquant	913	Mascot	1863	MSGF	1710	Crux	683
>PVP01_1208500.1-p1	4	Maxquant	916	Mascot	1866	MSGF	1715	Crux	684
>PVP01_1208700.1-p1	4	Maxquant	917	Mascot	1867	MSGF	1716	Crux	685
>PVP01_1209000.1-p1	4	Maxquant	918	Mascot	1868	MSGF	1717	Crux	686
>PVP01_1209700.1-p1	4	Maxquant	920	Mascot	1871	MSGF	1720	Crux	687
>PVP01_1210600.1-p1	4	Maxquant	921	Mascot	1872	MSGF	1721	Crux	688
>PVP01_1211800.1-p1	4	Maxquant	922	Mascot	1873	MSGF	1724	Crux	689
>PVP01_1212000.1-p1	4	Maxquant	923	Mascot	1874	MSGF	1725	Crux	690
>PVP01_1212800.1-p1	4	Maxquant	926	Mascot	1877	MSGF	1727	Crux	691
>PVP01_1213600.1-p1	4	Maxquant	927	Mascot	1878	MSGF	1729	Crux	692
>PVP01_1216400.1-p1	4	Maxquant	928	Mascot	1881	MSGF	1731	Crux	693
>PVP01_1216500.1-p1	4	Maxquant	929	Mascot	1882	MSGF	1732	Crux	694
>PVP01_1216600.1-p1	4	Maxquant	930	Mascot	1883	MSGF	1733	Crux	695
>PVP01_1219300.1-p1	4	Maxquant	932	Mascot	1884	MSGF	1736	Crux	696
>PVP01_1219600.1-p1	4	Maxquant	933	Mascot	1885	MSGF	1737	Crux	697
>PVP01_1219700.1-p1	4	Maxquant	934	Mascot	1886	MSGF	1738	Crux	698
>PVP01_1220400.1-p1	4	Maxquant	935	Mascot	1888	MSGF	1740	Crux	699
>PVP01_1221300.1-p1	4	Maxquant	936	Mascot	1890	MSGF	1742	Crux	700
>PVP01_1221700.1-p1	4	Maxquant	937	Mascot	1891	MSGF	1743	Crux	701
>PVP01_1221800.1-p1	4	Maxquant	938	Mascot	1892	MSGF	1744	Crux	702
>PVP01_1222800.1-p1	4	Maxquant	939	Mascot	1893	MSGF	1745	Crux	703
>PVP01_1222900.1-p1	4	Maxquant	940	Mascot	1894	MSGF	1746	Crux	704
>PVP01_1223300.1-p1	4	Maxquant	941	Mascot	1895	MSGF	1747	Crux	705
>PVP01_1226300.1-p1	4	Maxquant	942	Mascot	1899	MSGF	1752	Crux	706
>PVP01_1229400.1-p1	4	Maxquant	943	Mascot	1900	MSGF	1754	Crux	707
>PVP01_1229500.1-p1	4	Maxquant	944	Mascot	1901	MSGF	1755	Crux	708
>PVP01_1229700.1-p1	4	Maxquant	945	Mascot	1902	MSGF	1756	Crux	709
>PVP01_1231500.1-p1	4	Maxquant	949	Mascot	1907	MSGF	1762	Crux	710
>PVP01_1235700.1-p1	4	Maxquant	953	Mascot	1912	MSGF	1768	Crux	711
>PVP01_1238100.1-p1	4	Maxquant	955	Mascot	1915	MSGF	1771	Crux	712
>PVP01_1238700.1-p1	4	Maxquant	956	Mascot	1917	MSGF	1772	Crux	713
>PVP01_1240500.1-p1	4	Maxquant	957	Mascot	1919	MSGF	1773	Crux	714
>PVP01_1240900.1-p1	4	Maxquant	958	Mascot	1920	MSGF	1774	Crux	715
>PVP01_1243600.1-p1	4	Maxquant	960	Mascot	1924	MSGF	1778	Crux	716
>PVP01_1244000.1-p1	4	Maxquant	961	Mascot	1926	MSGF	1780	Crux	717
>PVP01_1244100.1-p1	4	Maxquant	962	Mascot	1927	MSGF	1781	Crux	718
>PVP01_1245500.1-p1	4	Maxquant	964	Mascot	1929	MSGF	1784	Crux	719
>PVP01_1246100.1-p1	4	Maxquant	965	Mascot	1931	MSGF	1785	Crux	720
>PVP01_1249600.1-p1	4	Maxquant	967	Mascot	1933	MSGF	1791	Crux	721
>PVP01_1249700.1-p1	4	Maxquant	968	Mascot	1934	MSGF	1792	Crux	722
>PVP01_1250100.1-p1	4	Maxquant	969	Mascot	1935	MSGF	1793	Crux	723
>PVP01_1252600.1-p1	4	Maxquant	971	Mascot	1939	MSGF	1796	Crux	725
>PVP01_1253200.1-p1	4	Maxquant	972	Mascot	1940	MSGF	1797	Crux	726
>PVP01_1253300.1-p1	4	Maxquant	973	Mascot	1941	MSGF	1798	Crux	727
>PVP01_1255200.1-p1	4	Maxquant	975	Mascot	1943	MSGF	1801	Crux	728
>PVP01_1255900.1-p1	4	Maxquant	976	Mascot	1944	MSGF	1802	Crux	729
>PVP01_1259100.1-p1	4	Maxquant	977	Mascot	1948	MSGF	1806	Crux	731
>PVP01_1260000.1-p1	4	Maxquant	978	Mascot	1949	MSGF	1807	Crux	732
>PVP01_1260800.1-p1	4	Maxquant	980	Mascot	1952	MSGF	1809	Crux	733
>PVP01_1261100.1-p1	4	Maxquant	981	Mascot	1953	MSGF	1810	Crux	734
>PVP01_1261300.1-p1	4	Maxquant	982	Mascot	1954	MSGF	1811	Crux	735
>PVP01_1262200.1-p1	4	Maxquant	983	Mascot	1957	MSGF	1813	Crux	737
>PVP01_1265800.1-p1	4	Maxquant	985	Mascot	1962	MSGF	1818	Crux	738
>PVP01_1265900.1-p1	4	Maxquant	986	Mascot	1963	MSGF	1819	Crux	739
>PVP01_1267200.1-p1	4	Maxquant	988	Mascot	1967	MSGF	1823	Crux	740
>PVP01_1268100.1-p1	4	Maxquant	989	Mascot	1969	MSGF	1825	Crux	742
>PVP01_1268400.1-p1	4	Maxquant	990	Mascot	1970	MSGF	1826	Crux	743
>PVP01_1268900.1-p1	4	Maxquant	991	Mascot	1971	MSGF	1827	Crux	744
>PVP01_1269800.1-p1	4	Maxquant	993	Mascot	1973	MSGF	1829	Crux	745
>PVP01_1271300.1-p1	4	Maxquant	994	Mascot	1976	MSGF	1831	Crux	746
>PVP01_1271400.1-p1	4	Maxquant	995	Mascot	1977	MSGF	1832	Crux	747
>PVP01_1272400.1-p1	4	Maxquant	996	Mascot	1978	MSGF	1834	Crux	748
>PVP01_1303000.1-p1	4	Maxquant	998	Mascot	1984	MSGF	1839	Crux	750
>PVP01_1303500.1-p1	4	Maxquant	999	Mascot	1985	MSGF	1841	Crux	751
>PVP01_1305300.1-p1	4	Maxquant	1001	Mascot	1986	MSGF	1844	Crux	752
>PVP01_1311000.1-p1	4	Maxquant	1004	Mascot	1991	MSGF	1850	Crux	753
>PVP01_1311200.1-p1	4	Maxquant	1006	Mascot	1993	MSGF	1852	Crux	754
>PVP01_1311600.1-p1	4	Maxquant	1007	Mascot	1994	MSGF	1853	Crux	755
>PVP01_1311800.1-p1	4	Maxquant	1008	Mascot	1995	MSGF	1854	Crux	756
>PVP01_1312300.1-p1	4	Maxquant	1009	Mascot	1996	MSGF	1855	Crux	757
>PVP01_1312500.1-p1	4	Maxquant	1010	Mascot	1997	MSGF	1856	Crux	758
>PVP01_1313200.1-p1	4	Maxquant	1011	Mascot	1999	MSGF	1857	Crux	759
>PVP01_1313800.1-p1	4	Maxquant	1013	Mascot	2001	MSGF	1859	Crux	760
>PVP01_1314700.1-p1	4	Maxquant	1015	Mascot	2003	MSGF	1862	Crux	762
>PVP01_1315200.1-p1	4	Maxquant	1016	Mascot	2004	MSGF	1863	Crux	763
>PVP01_1317400.1-p1	4	Maxquant	1018	Mascot	2005	MSGF	1864	Crux	765
>PVP01_1317700.1-p1	4	Maxquant	1019	Mascot	2006	MSGF	1865	Crux	766
>PVP01_1317800.1-p1	4	Maxquant	1020	Mascot	2007	MSGF	1866	Crux	767
>PVP01_1319600.1-p1	4	Maxquant	1021	Mascot	2010	MSGF	1867	Crux	768
>PVP01_1321000.1-p1	4	Maxquant	1022	Mascot	2011	MSGF	1868	Crux	769
>PVP01_1321400.1-p1	4	Maxquant	1023	Mascot	2012	MSGF	1869	Crux	770
>PVP01_1322800.1-p1	4	Maxquant	1024	Mascot	2013	MSGF	1871	Crux	771
>PVP01_1323200.1-p1	4	Maxquant	1025	Mascot	2014	MSGF	1872	Crux	772
>PVP01_1323300.1-p1	4	Maxquant	1026	Mascot	2015	MSGF	1873	Crux	773
>PVP01_1323600.1-p1	4	Maxquant	1027	Mascot	2016	MSGF	1874	Crux	774
>PVP01_1324700.1-p1	4	Maxquant	1028	Mascot	2017	MSGF	1875	Crux	775
>PVP01_1327700.1-p1	4	Maxquant	1033	Mascot	2021	MSGF	1880	Crux	776
>PVP01_1328500.1-p1	4	Maxquant	1034	Mascot	2022	MSGF	1882	Crux	777
>PVP01_1329100.1-p1	4	Maxquant	1036	Mascot	2024	MSGF	1884	Crux	778
>PVP01_1332400.1-p1	4	Maxquant	1039	Mascot	2029	MSGF	1887	Crux	780
>PVP01_1333600.1-p1	4	Maxquant	1040	Mascot	2030	MSGF	1890	Crux	781
>PVP01_1334600.1-p1	4	Maxquant	1042	Mascot	2032	MSGF	1891	Crux	783
>PVP01_1336400.1-p1	4	Maxquant	1043	Mascot	2034	MSGF	1893	Crux	784
>PVP01_1336600.1-p1	4	Maxquant	1044	Mascot	2035	MSGF	1894	Crux	785
>PVP01_1338500.1-p1	4	Maxquant	1047	Mascot	2040	MSGF	1899	Crux	786
>PVP01_1339000.1-p1	4	Maxquant	1048	Mascot	2042	MSGF	1901	Crux	787
>PVP01_1339100.1-p1	4	Maxquant	1049	Mascot	2043	MSGF	1902	Crux	788
>PVP01_1340400.1-p1	4	Maxquant	1051	Mascot	2046	MSGF	1906	Crux	789
>PVP01_1340900.1-p1	4	Maxquant	1052	Mascot	2047	MSGF	1907	Crux	790
>PVP01_1343200.1-p1	4	Maxquant	1053	Mascot	2049	MSGF	1910	Crux	791
>PVP01_1343900.1-p1	4	Maxquant	1054	Mascot	2050	MSGF	1911	Crux	792
>PVP01_1344700.1-p1	4	Maxquant	1055	Mascot	2051	MSGF	1913	Crux	793
>PVP01_1345600.1-p1	4	Maxquant	1056	Mascot	2053	MSGF	1915	Crux	794
>PVP01_1346500.1-p1	4	Maxquant	1059	Mascot	2055	MSGF	1917	Crux	795
>PVP01_1401400.1-p1	4	Maxquant	1061	Mascot	2058	MSGF	1920	Crux	796
>PVP01_1402100.1-p1	4	Maxquant	1062	Mascot	2060	MSGF	1922	Crux	797
>PVP01_1402200.1-p1	4	Maxquant	1063	Mascot	2061	MSGF	1923	Crux	798
>PVP01_1402700.1-p1	4	Maxquant	1064	Mascot	2062	MSGF	1924	Crux	799
>PVP01_1403000.1-p1	4	Maxquant	1066	Mascot	2063	MSGF	1926	Crux	800
>PVP01_1404100.1-p1	4	Maxquant	1069	Mascot	2065	MSGF	1928	Crux	801
>PVP01_1406200.1-p1	4	Maxquant	1071	Mascot	2068	MSGF	1932	Crux	802
>PVP01_1407300.1-p1	4	Maxquant	1072	Mascot	2069	MSGF	1933	Crux	803
>PVP01_1410100.1-p1	4	Maxquant	1075	Mascot	2076	MSGF	1936	Crux	805
>PVP01_1412500.1-p1	4	Maxquant	1078	Mascot	2078	MSGF	1939	Crux	807
>PVP01_1412800.1-p1	4	Maxquant	1079	Mascot	2079	MSGF	1940	Crux	808
>PVP01_1412900.1-p1	4	Maxquant	1080	Mascot	2080	MSGF	1941	Crux	809
>PVP01_1413600.1-p1	4	Maxquant	1081	Mascot	2081	MSGF	1942	Crux	810
>PVP01_1416800.1-p1	4	Maxquant	1082	Mascot	2085	MSGF	1945	Crux	811
>PVP01_1418700.1-p1	4	Maxquant	1083	Mascot	2086	MSGF	1947	Crux	812
>PVP01_1419700.1-p1	4	Maxquant	1084	Mascot	2088	MSGF	1948	Crux	813
>PVP01_1420800.1-p1	4	Maxquant	1085	Mascot	2090	MSGF	1949	Crux	814
>PVP01_1421400.1-p1	4	Maxquant	1086	Mascot	2091	MSGF	1950	Crux	815
>PVP01_1422800.1-p1	4	Maxquant	1087	Mascot	2092	MSGF	1951	Crux	816
>PVP01_1425500.1-p1	4	Maxquant	1090	Mascot	2095	MSGF	1954	Crux	817
>PVP01_1426100.1-p1	4	Maxquant	1091	Mascot	2097	MSGF	1955	Crux	818
>PVP01_1426300.1-p1	4	Maxquant	1092	Mascot	2098	MSGF	1956	Crux	819
>PVP01_1426400.1-p1	4	Maxquant	1093	Mascot	2099	MSGF	1957	Crux	820
>PVP01_1426900.1-p1	4	Maxquant	1094	Mascot	2100	MSGF	1958	Crux	821
>PVP01_1427000.1-p1	4	Maxquant	1095	Mascot	2101	MSGF	1959	Crux	822
>PVP01_1427800.1-p1	4	Maxquant	1096	Mascot	2103	MSGF	1960	Crux	823
>PVP01_1428200.1-p1	4	Maxquant	1097	Mascot	2105	MSGF	1961	Crux	824
>PVP01_1428700.1-p1	4	Maxquant	1098	Mascot	2106	MSGF	1963	Crux	825
>PVP01_1429700.1-p1	4	Maxquant	1100	Mascot	2110	MSGF	1968	Crux	826
>PVP01_1430300.1-p1	4	Maxquant	1101	Mascot	2111	MSGF	1969	Crux	827
>PVP01_1431600.1-p1	4	Maxquant	1103	Mascot	2114	MSGF	1971	Crux	828
>PVP01_1432600.1-p1	4	Maxquant	1105	Mascot	2115	MSGF	1972	Crux	829
>PVP01_1433800.1-p1	4	Maxquant	1106	Mascot	2117	MSGF	1974	Crux	830
>PVP01_1434100.1-p1	4	Maxquant	1107	Mascot	2118	MSGF	1975	Crux	831
>PVP01_1435000.1-p1	4	Maxquant	1108	Mascot	2119	MSGF	1976	Crux	832
>PVP01_1435300.1-p1	4	Maxquant	1109	Mascot	2120	MSGF	1977	Crux	833
>PVP01_1437900.1-p1	4	Maxquant	1110	Mascot	2123	MSGF	1982	Crux	834
>PVP01_1438400.1-p1	4	Maxquant	1111	Mascot	2124	MSGF	1983	Crux	835
>PVP01_1440500.1-p1	4	Maxquant	1113	Mascot	2129	MSGF	1986	Crux	836
>PVP01_1440900.1-p1	4	Maxquant	1114	Mascot	2130	MSGF	1987	Crux	837
>PVP01_1441300.1-p1	4	Maxquant	1115	Mascot	2131	MSGF	1988	Crux	838
>PVP01_1442500.1-p1	4	Maxquant	1116	Mascot	2133	MSGF	1991	Crux	839
>PVP01_1444000.1-p1	4	Maxquant	1117	Mascot	2134	MSGF	1992	Crux	840
>PVP01_1444300.1-p1	4	Maxquant	1118	Mascot	2135	MSGF	1993	Crux	841
>PVP01_1444500.1-p1	4	Maxquant	1119	Mascot	2136	MSGF	1994	Crux	842
>PVP01_1446800.1-p1	4	Maxquant	1121	Mascot	2137	MSGF	1995	Crux	843
>PVP01_1447400.1-p1	4	Maxquant	1123	Mascot	2139	MSGF	1996	Crux	844
>PVP01_1447500.1-p1	4	Maxquant	1124	Mascot	2140	MSGF	1997	Crux	845
>PVP01_1448400.1-p1	4	Maxquant	1126	Mascot	2142	MSGF	1999	Crux	846
>PVP01_1450300.1-p1	4	Maxquant	1127	Mascot	2144	MSGF	2000	Crux	847
>PVP01_1453800.1-p1	4	Maxquant	1129	Mascot	2151	MSGF	2006	Crux	848
>PVP01_1455500.1-p1	4	Maxquant	1131	Mascot	2153	MSGF	2008	Crux	849
>PVP01_1455800.1-p1	4	Maxquant	1132	Mascot	2154	MSGF	2009	Crux	850
>PVP01_1456200.1-p1	4	Maxquant	1133	Mascot	2156	MSGF	2010	Crux	851
>PVP01_1456900.1-p1	4	Maxquant	1134	Mascot	2157	MSGF	2011	Crux	852
>PVP01_1459800.1-p1	4	Maxquant	1135	Mascot	2163	MSGF	2016	Crux	853
>PVP01_1459900.1-p1	4	Maxquant	1136	Mascot	2164	MSGF	2017	Crux	854
>PVP01_1461700.1-p1	4	Maxquant	1138	Mascot	2167	MSGF	2018	Crux	855
>PVP01_1463500.1-p1	4	Maxquant	1141	Mascot	2170	MSGF	2021	Crux	856
>PVP01_1466600.1-p1	4	Maxquant	1146	Mascot	2175	MSGF	2027	Crux	857
>PVP01_1467200.1-p1	4	Maxquant	1147	Mascot	2176	MSGF	2028	Crux	858
>PVP01_1469200.1-p1	4	Maxquant	1148	Mascot	2178	MSGF	2032	Crux	859
PVP01_0000170.1-p1	4	Maxquant	495	Mascot	1235	MSGF	1055	Crux	365
PVP01_0004210.1-p1	4	Maxquant	498	Mascot	1248	MSGF	1066	Crux	367
403254331	3	Mascot	15	MSGF	13	Sequest	9
403254333	3	MSGF	14	Sequest	10	Crux	8
403254567	3	Mascot	19	MSGF	20	Sequest	14
403255664	3	Maxquant	22	Mascot	40	MSGF	39
403255846	3	Mascot	42	Sequest	32	Crux	18
403256206	3	Mascot	51	Sequest	38	Crux	21
403256208	3	Maxquant	28	Mascot	52	Sequest	39
403257012	3	Mascot	69	MSGF	67	Crux	32
403257089	3	Maxquant	36	Mascot	72	MSGF	70
403257095	3	Mascot	73	MSGF	71	Sequest	55
403257405	3	Maxquant	37	MSGF	76	Sequest	61
403257521	3	Mascot	82	MSGF	79	Sequest	64
403257696	3	Mascot	86	Sequest	67	Crux	37
403258199	3	Mascot	94	Sequest	73	Crux	40
403258201	3	Maxquant	43	MSGF	92	Sequest	74
403258304	3	Mascot	97	MSGF	93	Crux	42
403259129	3	Mascot	119	MSGF	102	Sequest	82
403259291	3	Maxquant	51	MSGF	105	Sequest	85
403260609	3	Maxquant	70	Mascot	159	MSGF	139
403261117	3	Mascot	171	MSGF	150	Sequest	120
403261164	3	Mascot	172	MSGF	153	Sequest	121
403261187	3	Mascot	173	MSGF	155	Sequest	122
403261665	3	Mascot	180	MSGF	165	Sequest	127
403261763	3	Mascot	184	MSGF	168	Sequest	129
403261837	3	Mascot	187	MSGF	170	Crux	67
403262049	3	Maxquant	84	Mascot	194	MSGF	176
403262596	3	MSGF	185	Sequest	141	Crux	74
403262963	3	Maxquant	93	MSGF	193	Crux	76
403263126	3	Mascot	214	MSGF	195	Sequest	147
403263261	3	Maxquant	97	Mascot	221	Crux	79
403263350	3	Mascot	223	Sequest	152	Crux	80
403263487	3	Mascot	225	Sequest	154	Crux	81
403264028	3	Mascot	237	MSGF	215	Crux	84
403264257	3	Maxquant	106	MSGF	217	Sequest	167
403264912	3	Mascot	253	MSGF	226	Sequest	179
403264950	3	Mascot	254	MSGF	227	Sequest	182
403265156	3	Mascot	258	Sequest	187	Crux	89
403265251	3	Mascot	263	Sequest	195	Crux	92
403265255	3	Maxquant	114	MSGF	233	Sequest	196
403266070	3	Mascot	278	MSGF	245	Sequest	205
403267347	3	Mascot	307	MSGF	273	Sequest	227
403267653	3	Mascot	312	MSGF	280	Crux	109
403267940	3	Mascot	317	MSGF	286	Crux	110
403268105	3	Maxquant	142	Mascot	323	MSGF	290
403268633	3	Maxquant	148	MSGF	300	Sequest	243
403269452	3	MSGF	314	Sequest	255	Crux	123
403269617	3	Mascot	351	MSGF	320	Sequest	259
403270121	3	Mascot	357	MSGF	326	Sequest	265
403270340	3	Mascot	360	MSGF	329	Sequest	266
403270721	3	Mascot	374	Sequest	276	Crux	127
403271399	3	Mascot	391	MSGF	355	Sequest	293
403272317	3	Mascot	413	MSGF	377	Sequest	311
403272559	3	Mascot	422	MSGF	386	Sequest	317
403272775	3	Mascot	429	MSGF	389	Sequest	321
403273327	3	Maxquant	189	MSGF	403	Sequest	328
403273682	3	Mascot	445	MSGF	407	Sequest	332
403273808	3	Maxquant	190	MSGF	409	Sequest	333
403274020	3	Mascot	449	MSGF	411	Sequest	335
403274199	3	Mascot	455	Sequest	338	Crux	151
403274395	3	Mascot	457	MSGF	416	Sequest	340
403274462	3	Mascot	459	Sequest	341	Crux	152
403274848	3	Mascot	471	MSGF	425	Sequest	349
403275092	3	Mascot	480	MSGF	431	Sequest	356
403275246	3	Maxquant	202	Mascot	483	MSGF	434
403275793	3	MSGF	441	Sequest	362	Crux	162
403276020	3	Mascot	504	Sequest	365	Crux	164
403276022	3	Maxquant	208	MSGF	446	Sequest	366
403276024	3	Maxquant	209	MSGF	447	Sequest	367
403276512	3	Mascot	511	MSGF	454	Sequest	371
403276755	3	Mascot	515	MSGF	457	Sequest	373
403277003	3	Maxquant	214	MSGF	463	Sequest	378
403277182	3	Mascot	525	MSGF	466	Crux	170
403277273	3	Mascot	531	MSGF	469	Sequest	385
403277478	3	Mascot	534	Sequest	388	Crux	174
403277660	3	Mascot	537	MSGF	473	Sequest	390
403277744	3	Maxquant	220	MSGF	475	Sequest	392
403277797	3	Maxquant	221	Mascot	538	Crux	175
403278262	3	Mascot	551	MSGF	487	Sequest	399
403279033	3	Mascot	569	MSGF	504	Crux	183
403279881	3	Mascot	586	Sequest	429	Crux	192
403280304	3	Mascot	597	MSGF	532	Sequest	435
403280704	3	Mascot	608	MSGF	540	Sequest	441
403280745	3	Mascot	610	MSGF	541	Sequest	442
403280769	3	MSGF	542	Sequest	443	Crux	198
403280810	3	Mascot	611	MSGF	544	Sequest	444
403282920	3	Mascot	645	MSGF	579	Sequest	473
403282966	3	Mascot	650	MSGF	581	Sequest	475
403283022	3	Mascot	652	MSGF	583	Sequest	477
403283188	3	Mascot	660	MSGF	588	Sequest	481
403284030	3	Maxquant	275	Mascot	674	MSGF	598
403284327	3	MSGF	604	Sequest	502	Crux	219
403284419	3	Mascot	680	MSGF	605	Crux	220
403285306	3	Maxquant	283	Mascot	697	Sequest	513
403288052	3	Mascot	752	MSGF	663	Sequest	552
403288322	3	Mascot	760	MSGF	667	Sequest	559
403289148	3	Mascot	776	MSGF	678	Sequest	573
403289251	3	Mascot	777	Sequest	574	Crux	250
403290086	3	Mascot	796	MSGF	691	Sequest	587
403290170	3	Maxquant	321	Mascot	797	Sequest	588
403290195	3	Mascot	798	MSGF	694	Crux	254
403291491	3	Mascot	828	MSGF	713	Sequest	603
403293295	3	Mascot	875	MSGF	754	Sequest	631
403293368	3	Mascot	879	MSGF	756	Sequest	634
403293472	3	Mascot	880	MSGF	757	Sequest	635
403293545	3	Mascot	882	MSGF	759	Sequest	637
403294641	3	Mascot	902	MSGF	778	Sequest	655
403296559	3	Maxquant	373	MSGF	812	Sequest	684
403296561	3	Mascot	944	MSGF	813	Crux	298
403296729	3	Mascot	951	MSGF	820	Sequest	698
403296937	3	Maxquant	378	MSGF	824	Sequest	702
403296965	3	Maxquant	380	Mascot	959	Sequest	706
403297045	3	Mascot	961	MSGF	829	Sequest	707
403297615	3	Maxquant	387	Mascot	972	Crux	312
403297938	3	Mascot	974	MSGF	842	Sequest	720
403298112	3	Mascot	978	MSGF	844	Sequest	722
403298859	3	Mascot	998	MSGF	863	Sequest	736
403298954	3	Maxquant	399	Mascot	999	MSGF	864
403299908	3	MSGF	881	Sequest	748	Crux	323
403300203	3	Maxquant	407	MSGF	883	Sequest	755
403300830	3	Maxquant	417	Mascot	1038	Sequest	766
403300938	3	Maxquant	419	Mascot	1041	Crux	330
403301139	3	Mascot	1045	MSGF	897	Sequest	770
403301255	3	Mascot	1050	MSGF	899	Sequest	771
403301550	3	Maxquant	423	MSGF	902	Sequest	773
403301570	3	Maxquant	424	MSGF	903	Sequest	774
403302043	3	Mascot	1067	MSGF	909	Sequest	780
403302051	3	Maxquant	426	Mascot	1068	Sequest	781
403302595	3	Mascot	1082	MSGF	924	Sequest	793
403302779	3	Mascot	1086	Sequest	796	Crux	336
403303640	3	Mascot	1111	MSGF	942	Sequest	813
403304219	3	Maxquant	442	MSGF	950	Sequest	824
403305253	3	Maxquant	452	Mascot	1148	Sequest	847
403305733	3	Mascot	1159	MSGF	979	Sequest	861
403306219	3	Mascot	1163	MSGF	988	Sequest	867
403306894	3	Maxquant	467	Mascot	1175	Crux	353
403306968	3	Mascot	1178	MSGF	1001	Sequest	878
403307005	3	Mascot	1182	MSGF	1004	Sequest	881
403307827	3	Maxquant	477	Mascot	1192	Crux	357
403308029	3	Mascot	1194	MSGF	1022	Sequest	895
403308061	3	Mascot	1196	MSGF	1023	Sequest	896
403308177	3	Mascot	1201	MSGF	1026	Sequest	899
403308310	3	Mascot	1204	MSGF	1027	Sequest	900
403308341	3	Mascot	1205	MSGF	1028	Sequest	901
403309049	3	Maxquant	486	Mascot	1219	MSGF	1043
>PVP01_0104800.1-p1	3	Maxquant	503	Mascot	1264	MSGF	1085
>PVP01_0105900.1-p1	3	Maxquant	504	Mascot	1266	MSGF	1088
>PVP01_0106200.1-p1	3	Maxquant	505	Mascot	1267	MSGF	1089
>PVP01_0107900.1-p1	3	Maxquant	507	Mascot	1270	MSGF	1090
>PVP01_0109100.1-p1	3	Maxquant	509	Mascot	1272	MSGF	1093
>PVP01_0111000.1-p1	3	Maxquant	511	Mascot	1276	MSGF	1097
>PVP01_0112200.1-p1	3	Maxquant	514	Mascot	1278	MSGF	1100
>PVP01_0118200.1-p1	3	Maxquant	520	Mascot	1288	MSGF	1109
>PVP01_0202200.1-p1	3	Maxquant	530	Mascot	1299	MSGF	1121
>PVP01_0214900.1-p1	3	Maxquant	539	Mascot	1320	MSGF	1140
>PVP01_0216700.1-p1	3	Maxquant	541	Mascot	1321	MSGF	1142
>PVP01_0311300.1-p1	3	Maxquant	547	Mascot	1335	MSGF	1159
>PVP01_0312600.1-p1	3	Maxquant	549	Mascot	1337	MSGF	1161
>PVP01_0317400.1-p1	3	Maxquant	556	Mascot	1344	MSGF	1171
>PVP01_0407200.1-p1	3	Maxquant	559	Mascot	1352	MSGF	1182
>PVP01_0414700.1-p1	3	Maxquant	566	Mascot	1362	Crux	417
>PVP01_0506500.1-p1	3	Maxquant	585	Mascot	1385	MSGF	1220
>PVP01_0508200.1-p1	3	Maxquant	587	Mascot	1387	MSGF	1223
>PVP01_0513600.1-p1	3	Maxquant	592	Mascot	1396	MSGF	1230
>PVP01_0517100.1-p1	3	Maxquant	595	Mascot	1402	MSGF	1235
>PVP01_0520100.1-p1	3	Maxquant	600	Mascot	1409	MSGF	1242
>PVP01_0530900.1-p1	3	Maxquant	608	Mascot	1430	MSGF	1257
>PVP01_0532300.1-p1	3	Maxquant	609	Mascot	1431	MSGF	1259
>PVP01_0604600.1-p1	3	Maxquant	616	Mascot	1441	MSGF	1270
>PVP01_0606800.1-p1	3	Maxquant	618	Mascot	1443	MSGF	1274
>PVP01_0618300.1-p1	3	Maxquant	628	Mascot	1454	MSGF	1285
>PVP01_0620000.1-p1	3	Maxquant	631	Mascot	1456	MSGF	1287
>PVP01_0622100.1-p1	3	Maxquant	636	Mascot	1462	MSGF	1291
>PVP01_0702300.1-p1	3	Maxquant	642	Mascot	1470	MSGF	1301
>PVP01_0702800.1-p1	3	Maxquant	643	Mascot	1472	MSGF	1303
>PVP01_0703000.1-p1	3	Maxquant	644	Mascot	1473	MSGF	1305
>PVP01_0708300.1-p1	3	Maxquant	650	Mascot	1484	MSGF	1317
>PVP01_0710800.1-p1	3	Maxquant	652	Mascot	1488	MSGF	1324
>PVP01_0710900.1-p1	3	Maxquant	653	Mascot	1489	MSGF	1325
>PVP01_0711600.1-p1	3	Maxquant	654	Mascot	1490	MSGF	1328
>PVP01_0713500.1-p1	3	Maxquant	657	Mascot	1493	MSGF	1331
>PVP01_0718200.1-p1	3	Maxquant	663	Mascot	1503	MSGF	1340
>PVP01_0719200.1-p1	3	Maxquant	664	Mascot	1507	MSGF	1342
>PVP01_0720400.1-p1	3	Maxquant	665	Mascot	1508	MSGF	1343
>PVP01_0728900.1-p1	3	Maxquant	673	Mascot	1520	MSGF	1353
>PVP01_0733200.1-p1	3	Maxquant	677	Mascot	1527	MSGF	1358
>PVP01_0802700.1-p1	3	Maxquant	685	Mascot	1539	MSGF	1370
>PVP01_0810700.1-p1	3	Maxquant	698	Mascot	1559	MSGF	1389
>PVP01_0812700.1-p1	3	Maxquant	703	Mascot	1564	MSGF	1395
>PVP01_0816900.1-p1	3	Maxquant	710	Mascot	1572	MSGF	1404
>PVP01_0820600.1-p1	3	Maxquant	717	Mascot	1581	MSGF	1414
>PVP01_0823100.1-p1	3	Maxquant	719	Mascot	1584	MSGF	1417
>PVP01_0823400.1-p1	3	Maxquant	721	Mascot	1586	MSGF	1419
>PVP01_0823500.1-p1	3	Maxquant	722	Mascot	1587	MSGF	1420
>PVP01_0827400.1-p1	3	Maxquant	724	Mascot	1590	MSGF	1422
>PVP01_0827900.1-p1	3	Maxquant	725	Mascot	1591	MSGF	1423
>PVP01_0831100.1-p1	3	Maxquant	729	Mascot	1596	MSGF	1430
>PVP01_0833100.1-p1	3	Maxquant	732	Mascot	1601	MSGF	1434
>PVP01_0833200.1-p1	3	Maxquant	733	Mascot	1602	MSGF	1435
>PVP01_0833900.1-p1	3	Maxquant	736	Mascot	1605	MSGF	1438
>PVP01_0836500.1-p1	3	Maxquant	739	Mascot	1610	MSGF	1446
>PVP01_0904500.1-p1	3	Maxquant	744	Mascot	1620	MSGF	1456
>PVP01_0904600.1-p1	3	Maxquant	745	Mascot	1621	MSGF	1457
>PVP01_0914500.1-p1	3	Maxquant	759	Mascot	1637	MSGF	1474
>PVP01_0917900.1-p1	3	Maxquant	763	Mascot	1642	MSGF	1484
>PVP01_0925800.1-p1	3	Maxquant	775	Mascot	1660	MSGF	1501
>PVP01_0926700.1-p1	3	Maxquant	776	Mascot	1663	MSGF	1505
>PVP01_0929100.1-p1	3	Maxquant	781	Mascot	1669	MSGF	1513
>PVP01_0929800.1-p1	3	Maxquant	783	Mascot	1672	MSGF	1515
>PVP01_0936800.1-p1	3	Maxquant	793	Mascot	1684	MSGF	1529
>PVP01_0939100.1-p1	3	Maxquant	797	Mascot	1690	MSGF	1534
>PVP01_0943300.1-p1	3	Maxquant	801	Mascot	1698	MSGF	1539
>PVP01_0943500.1-p1	3	Maxquant	802	Mascot	1699	MSGF	1540
>PVP01_0945600.1-p1	3	Maxquant	804	Mascot	1701	MSGF	1543
>PVP01_1006600.1-p1	3	Maxquant	812	Mascot	1714	MSGF	1557
>PVP01_1006800.1-p1	3	Maxquant	814	Mascot	1716	MSGF	1559
>PVP01_1009900.1-p1	3	Maxquant	816	Mascot	1718	MSGF	1562
>PVP01_1010900.1-p1	3	Maxquant	817	Mascot	1721	MSGF	1563
>PVP01_1012200.1-p1	3	Maxquant	818	Mascot	1723	MSGF	1565
>PVP01_1013900.1-p1	3	Maxquant	820	Mascot	1725	MSGF	1568
>PVP01_1015600.1-p1	3	Maxquant	822	Mascot	1730	MSGF	1575
>PVP01_1020200.1-p1	3	Maxquant	830	Mascot	1739	MSGF	1586
>PVP01_1021300.1-p1	3	Maxquant	832	Mascot	1742	MSGF	1588
>PVP01_1022200.1-p1	3	Maxquant	833	Mascot	1743	MSGF	1589
>PVP01_1026400.1-p1	3	Maxquant	837	Mascot	1748	MSGF	1595
>PVP01_1028300.1-p1	3	Maxquant	840	Mascot	1754	MSGF	1601
>PVP01_1030500.1-p1	3	Maxquant	841	Mascot	1760	MSGF	1604
>PVP01_1031100.1-p1	3	Maxquant	842	Mascot	1761	MSGF	1606
>PVP01_1032600.1-p1	3	Maxquant	844	Mascot	1763	MSGF	1609
>PVP01_1103900.1-p1	3	Maxquant	851	Mascot	1774	MSGF	1623
>PVP01_1110900.1-p1	3	Maxquant	857	Mascot	1784	MSGF	1633
>PVP01_1112500.1-p1	3	Maxquant	859	Mascot	1786	MSGF	1635
>PVP01_1114000.1-p1	3	Maxquant	862	Mascot	1788	MSGF	1638
>PVP01_1121200.1-p1	3	Maxquant	869	Mascot	1797	MSGF	1648
>PVP01_1122000.1-p1	3	Maxquant	870	Mascot	1800	MSGF	1651
>PVP01_1126700.1-p1	3	Maxquant	875	Mascot	1809	MSGF	1660
>PVP01_1127700.1-p1	3	Maxquant	876	Mascot	1811	MSGF	1661
>PVP01_1128400.1-p1	3	Maxquant	878	Mascot	1813	MSGF	1664
>PVP01_1130100.1-p1	3	Maxquant	880	Mascot	1816	MSGF	1666
>PVP01_1133500.1-p1	3	Maxquant	886	Mascot	1826	MSGF	1673
>PVP01_1140200.1-p1	3	Maxquant	892	Mascot	1834	MSGF	1680
>PVP01_1142100.1-p1	3	Maxquant	894	Mascot	1839	MSGF	1683
>PVP01_1204700.1-p1	3	Maxquant	909	Mascot	1859	MSGF	1705
>PVP01_1207100.1-p1	3	Maxquant	912	Mascot	1862	MSGF	1709
>PVP01_1208000.1-p1	3	Maxquant	914	Mascot	1864	MSGF	1711
>PVP01_1209100.1-p1	3	Maxquant	919	Mascot	1869	MSGF	1718
>PVP01_1212200.1-p1	3	Maxquant	924	Mascot	1875	MSGF	1726
>PVP01_1230700.1-p1	3	Maxquant	946	Mascot	1904	MSGF	1759
>PVP01_1231200.1-p1	3	Maxquant	947	Mascot	1906	MSGF	1760
>PVP01_1232700.1-p1	3	Maxquant	950	Mascot	1908	MSGF	1764
>PVP01_1233600.1-p1	3	Maxquant	951	Mascot	1909	MSGF	1765
>PVP01_1235900.1-p1	3	Maxquant	954	Mascot	1913	MSGF	1769
>PVP01_1244900.1-p1	3	Maxquant	963	Mascot	1928	MSGF	1783
>PVP01_1246400.1-p1	3	Maxquant	966	Mascot	1932	MSGF	1786
>PVP01_1252300.1-p1	3	Maxquant	970	Mascot	1938	MSGF	1795
>PVP01_1255000.1-p1	3	Maxquant	974	Mascot	1942	MSGF	1800
>PVP01_1260400.1-p1	3	Maxquant	979	Mascot	1950	MSGF	1808
>PVP01_1264100.1-p1	3	Maxquant	984	Mascot	1959	MSGF	1816
>PVP01_1267100.1-p1	3	Maxquant	987	Mascot	1966	MSGF	1822
>PVP01_1269500.1-p1	3	Maxquant	992	Mascot	1972	MSGF	1828
>PVP01_1301500.1-p1	3	Maxquant	997	Mascot	1979	MSGF	1836
>PVP01_1310600.1-p1	3	Maxquant	1003	Mascot	1990	MSGF	1849
>PVP01_1311100.1-p1	3	Maxquant	1005	Mascot	1992	MSGF	1851
>PVP01_1313500.1-p1	3	Maxquant	1012	Mascot	2000	MSGF	1858
>PVP01_1314200.1-p1	3	Maxquant	1014	Mascot	2002	MSGF	1861
>PVP01_1324800.1-p1	3	Maxquant	1029	Mascot	2018	MSGF	1876
>PVP01_1325300.1-p1	3	Maxquant	1030	Mascot	2019	MSGF	1877
>PVP01_1326600.1-p1	3	Maxquant	1031	Mascot	2020	MSGF	1879
>PVP01_1328700.1-p1	3	Maxquant	1035	Mascot	2023	MSGF	1883
>PVP01_1334500.1-p1	3	Maxquant	1041	Mascot	2031	Crux	782
>PVP01_1336900.1-p1	3	Maxquant	1045	Mascot	2036	MSGF	1895
>PVP01_1338300.1-p1	3	Maxquant	1046	Mascot	2039	MSGF	1898
>PVP01_1339300.1-p1	3	Maxquant	1050	Mascot	2044	MSGF	1903
>PVP01_1346200.1-p1	3	Maxquant	1058	Mascot	2054	MSGF	1916
>PVP01_1401300.1-p1	3	Maxquant	1060	Mascot	2057	MSGF	1919
>PVP01_1403700.1-p1	3	Maxquant	1068	Mascot	2064	MSGF	1927
>PVP01_1411600.1-p1	3	Maxquant	1076	MSGF	1937	Crux	806
>PVP01_1412300.1-p1	3	Maxquant	1077	Mascot	2077	MSGF	1938
>PVP01_1423100.1-p1	3	Maxquant	1088	Mascot	2093	MSGF	1952
>PVP01_1425200.1-p1	3	Maxquant	1089	Mascot	2094	MSGF	1953
>PVP01_1428900.1-p1	3	Maxquant	1099	Mascot	2107	MSGF	1964
>PVP01_1431400.1-p1	3	Maxquant	1102	Mascot	2113	MSGF	1970
>PVP01_1438700.1-p1	3	Maxquant	1112	Mascot	2126	MSGF	1985
>PVP01_1447600.1-p1	3	Maxquant	1125	Mascot	2141	MSGF	1998
>PVP01_1453700.1-p1	3	Maxquant	1128	Mascot	2150	MSGF	2005
>PVP01_1455100.1-p1	3	Maxquant	1130	Mascot	2152	MSGF	2007
>PVP01_1462200.1-p1	3	Maxquant	1139	Mascot	2168	MSGF	2019
>PVP01_1463200.1-p1	3	Maxquant	1140	Mascot	2169	MSGF	2020
>PVP01_1464500.1-p1	3	Maxquant	1142	Mascot	2171	MSGF	2022
>PVP01_1465600.1-p1	3	Maxquant	1143	Mascot	2172	MSGF	2023
>PVP01_1466000.1-p1	3	Maxquant	1144	Mascot	2173	MSGF	2025
>PVP01_1466200.1-p1	3	Maxquant	1145	Mascot	2174	MSGF	2026
>PVP01_1469500.1-p1	3	Maxquant	1150	Mascot	2180	MSGF	2033
>PVP01_1469900.1-p1	3	Maxquant	1151	Mascot	2182	MSGF	2035
>PVP01_1470000.1-p1	3	Maxquant	1152	Mascot	2183	MSGF	2036
PVP01_0000130.1-p1	3	Maxquant	494	Mascot	1232	MSGF	1052
PVP01_0000140.1-p1	3	Mascot	1233	MSGF	1053	Crux	364
PVP01_0001440.1-p1	3	Maxquant	496	Mascot	1240	MSGF	1060
PVP01_0004250.1-p1	3	Maxquant	499	Mascot	1249	Crux	368
PVP01_0209100.1-p1	3	Mascot	1309	MSGF	1129	Crux	389
PVP01_0217200.1-p1	3	Mascot	1322	MSGF	1143	Crux	392
PVP01_0405400.1-p1	3	Mascot	1349	MSGF	1180	Crux	410
PVP01_0416900.1-p1	3	Mascot	1366	MSGF	1196	Crux	421
PVP01_0421700.1-p1	3	Mascot	1378	MSGF	1208	Crux	429
PVP01_0522700.1-p1	3	Mascot	1415	MSGF	1246	Crux	449
PVP01_0602700.1-p1	3	Mascot	1439	MSGF	1268	Crux	461
PVP01_0607100.1-p1	3	Mascot	1445	MSGF	1276	Crux	464
PVP01_0726300.1-p1	3	Mascot	1518	MSGF	1351	Crux	499
PVP01_0803400.1-p1	3	Mascot	1541	MSGF	1372	Crux	511
PVP01_0803600.1-p1	3	Mascot	1543	MSGF	1374	Crux	513
PVP01_0807400.1-p1	3	Mascot	1550	MSGF	1381	Crux	518
PVP01_0814700.1-p1	3	Mascot	1566	MSGF	1398	Crux	529
PVP01_0838300.1-p1	3	Mascot	1616	MSGF	1453	Crux	555
PVP01_1026500.1-p1	3	Mascot	1749	MSGF	1596	Crux	623
PVP01_1106100.1-p1	3	Mascot	1779	MSGF	1627	Crux	636
PVP01_1125900.1-p1	3	Mascot	1807	MSGF	1658	Crux	651
PVP01_1131700.1-p1	3	Mascot	1821	MSGF	1669	Crux	657
PVP01_1201500.1-p1	3	Mascot	1851	MSGF	1698	Crux	674
PVP01_1250200.1-p1	3	Mascot	1936	MSGF	1794	Crux	724
PVP01_1256900.1-p1	3	Mascot	1945	MSGF	1803	Crux	730
PVP01_1261900.1-p1	3	Mascot	1956	MSGF	1812	Crux	736
PVP01_1267600.1-p1	3	Mascot	1968	MSGF	1824	Crux	741
PVP01_1302800.1-p1	3	Mascot	1983	MSGF	1838	Crux	749
PVP01_1329600.1-p1	3	Mascot	2025	MSGF	1886	Crux	779
PVP01_1469800.1-p1	3	Mascot	2181	MSGF	2034	Crux	860
PVP01_1470200.1-p1	3	Mascot	2184	MSGF	2037	Crux	861
PVP01_1471200.1-p1	3	Mascot	2185	MSGF	2038	Crux	862
PVP01_1471500.1-p1	3	Mascot	2186	MSGF	2039	Crux	863
403253959	2	Mascot	5	MSGF	4
403254047	2	Mascot	7	MSGF	7
403254227	2	Maxquant	7	MSGF	10
403254737	2	MSGF	25	Sequest	18
403254842	2	Mascot	24	MSGF	27
403254897	2	MSGF	28	Sequest	20
403255447	2	MSGF	36	Sequest	27
403255457	2	Mascot	34	Sequest	28
403255848	2	Maxquant	24	MSGF	41
403255983	2	MSGF	45	Sequest	36
403256212	2	MSGF	49	Sequest	41
403256696	2	MSGF	61	Sequest	49
403257793	2	MSGF	83	Sequest	68
403257891	2	Mascot	88	MSGF	84
403258163	2	Mascot	93	MSGF	89
403258529	2	Mascot	103	MSGF	96
403258589	2	Mascot	109	Sequest	77
403258930	2	Mascot	113	MSGF	100
403259344	2	Mascot	124	MSGF	107
403259584	2	Mascot	131	MSGF	115
403259807	2	Maxquant	58	Sequest	92
403259917	2	MSGF	119	Sequest	93
403260069	2	Mascot	141	MSGF	123
403260112	2	MSGF	127	Sequest	97
403260172	2	Mascot	145	Sequest	99
403260369	2	Maxquant	62	Sequest	100
403260397	2	Mascot	147	Sequest	102
403260524	2	MSGF	133	Sequest	106
403260587	2	MSGF	137	Sequest	109
403261014	2	MSGF	149	Sequest	119
403261583	2	Maxquant	80	Mascot	179
403261910	2	Mascot	189	Sequest	131
403262875	2	MSGF	191	Sequest	144
403263208	2	Maxquant	96	Mascot	217
403263279	2	MSGF	198	Sequest	150
403263495	2	Maxquant	100	MSGF	202
403263513	2	MSGF	203	Sequest	155
403263661	2	MSGF	205	Sequest	156
403263769	2	Mascot	229	Sequest	158
403263771	2	Mascot	230	MSGF	208
403263784	2	MSGF	210	Sequest	159
403263845	2	Maxquant	102	Mascot	232
403263940	2	MSGF	213	Sequest	161
403263954	2	MSGF	214	Crux	83
403264251	2	Mascot	243	Sequest	165
403264253	2	Mascot	244	Sequest	166
403264409	2	MSGF	220	Sequest	169
403264421	2	MSGF	222	Sequest	171
403264606	2	Mascot	249	MSGF	223
403264904	2	Maxquant	110	Sequest	178
403265160	2	Maxquant	112	Sequest	188
403265337	2	Mascot	266	Sequest	199
403265499	2	Mascot	272	MSGF	238
403265832	2	MSGF	241	Sequest	203
403266335	2	Mascot	286	Sequest	212
403266710	2	Maxquant	129	Mascot	292
403267286	2	Mascot	305	MSGF	272
403267416	2	MSGF	276	Sequest	228
403267713	2	MSGF	282	Sequest	232
403267906	2	MSGF	285	Sequest	233
403268371	2	Mascot	328	MSGF	295
403268536	2	Maxquant	145	Sequest	239
403269492	2	MSGF	317	Sequest	256
403269660	2	Mascot	352	MSGF	321
403269672	2	Maxquant	160	Mascot	353
403270371	2	Mascot	361	Sequest	267
403270373	2	Mascot	362	Sequest	268
403270674	2	MSGF	336	Sequest	272
403270717	2	Mascot	373	Sequest	275
403270761	2	MSGF	346	Sequest	280
403270775	2	MSGF	347	Sequest	281
403271044	2	MSGF	350	Sequest	287
403271125	2	MSGF	352	Sequest	289
403271274	2	Mascot	388	Sequest	290
403271599	2	MSGF	361	Sequest	298
403271630	2	MSGF	363	Sequest	300
403271674	2	MSGF	365	Sequest	304
403271724	2	Mascot	402	MSGF	366
403271767	2	MSGF	367	Sequest	305
403271851	2	Mascot	406	MSGF	368
403272553	2	MSGF	385	Sequest	315
403272671	2	Mascot	424	Crux	143
403273166	2	Maxquant	188	Mascot	439
403273168	2	MSGF	401	Sequest	327
403273529	2	Mascot	443	Crux	147
403273867	2	Maxquant	191	Mascot	447
403273869	2	MSGF	410	Sequest	334
403274464	2	Maxquant	194	MSGF	417
403274466	2	MSGF	418	Sequest	342
403274559	2	Mascot	462	MSGF	420
403274950	2	Maxquant	200	Sequest	351
403275062	2	Maxquant	201	Sequest	355
403275402	2	Mascot	489	Sequest	358
403275641	2	Mascot	500	Sequest	361
403276026	2	MSGF	448	Sequest	368
403276098	2	MSGF	450	Sequest	370
403276525	2	Mascot	512	Crux	165
403276803	2	MSGF	459	Sequest	375
403276997	2	Mascot	521	Sequest	377
403277480	2	Maxquant	219	MSGF	472
403277662	2	MSGF	474	Sequest	391
403277799	2	MSGF	477	Sequest	393
403278022	2	Mascot	543	MSGF	482
403278163	2	Mascot	548	MSGF	486
403278330	2	MSGF	488	Sequest	401
403278377	2	Mascot	553	Sequest	402
403278462	2	Mascot	557	Sequest	405
403278598	2	MSGF	492	Sequest	408
403278948	2	Mascot	566	Sequest	411
403279427	2	MSGF	511	Crux	185
403279502	2	Mascot	577	MSGF	514
403279766	2	MSGF	519	Sequest	424
403280029	2	Mascot	590	MSGF	528
403280460	2	Mascot	603	Crux	196
403281173	2	MSGF	547	Sequest	447
403281270	2	Sequest	451	Crux	201
403281647	2	MSGF	558	Sequest	454
403281663	2	MSGF	559	Sequest	455
403282249	2	MSGF	570	Sequest	464
403282321	2	Maxquant	259	Sequest	465
403282338	2	Sequest	466	Crux	208
403282697	2	Maxquant	261	Sequest	471
403283220	2	Maxquant	269	Sequest	484
403283349	2	Maxquant	273	Mascot	668
403284182	2	MSGF	601	Sequest	500
403284842	2	MSGF	614	Sequest	506
403284844	2	MSGF	615	Sequest	507
403285040	2	MSGF	619	Sequest	509
403285046	2	MSGF	620	Sequest	510
403285083	2	Mascot	694	MSGF	621
403285519	2	MSGF	623	Sequest	516
403286101	2	Mascot	715	MSGF	632
403286232	2	MSGF	634	Sequest	526
403286841	2	Mascot	724	Crux	233
403286843	2	Maxquant	293	MSGF	643
403287392	2	Mascot	732	MSGF	650
403287619	2	MSGF	652	Sequest	539
403287876	2	Mascot	748	Sequest	546
403287973	2	MSGF	662	Sequest	551
403288083	2	Maxquant	304	Mascot	755
403288113	2	Mascot	756	Sequest	554
403288248	2	MSGF	666	Sequest	557
403288953	2	Maxquant	314	Sequest	569
403289005	2	MSGF	674	Sequest	570
403289299	2	Maxquant	316	Sequest	576
403289466	2	Maxquant	318	Mascot	784
403289472	2	MSGF	683	Sequest	579
403290056	2	Mascot	795	MSGF	690
403290172	2	MSGF	693	Sequest	589
403290290	2	Mascot	800	Crux	255
403290295	2	MSGF	695	Crux	256
403291199	2	Maxquant	325	Sequest	598
403291714	2	MSGF	717	Sequest	606
403292054	2	Mascot	839	MSGF	722
403292056	2	Mascot	840	MSGF	723
403292058	2	Mascot	841	MSGF	724
403292076	2	Mascot	842	MSGF	725
403292106	2	Mascot	843	MSGF	726
403292443	2	Maxquant	339	Mascot	853
403292919	2	Mascot	870	MSGF	747
403293113	2	MSGF	752	Sequest	628
403293223	2	Mascot	873	MSGF	753
403293613	2	Mascot	884	Sequest	640
403294323	2	MSGF	775	Sequest	652
403294656	2	Maxquant	358	Sequest	657
403295191	2	Mascot	910	MSGF	786
403295208	2	Maxquant	361	Mascot	911
403295226	2	MSGF	787	Sequest	660
403295335	2	Mascot	915	Sequest	662
403295559	2	MSGF	791	Sequest	664
403295832	2	Mascot	924	Sequest	667
403296085	2	MSGF	800	Sequest	671
403296202	2	Mascot	930	MSGF	802
403296208	2	Mascot	931	Sequest	675
403296358	2	Mascot	937	Crux	294
403296360	2	MSGF	808	Sequest	679
403296565	2	Maxquant	374	Sequest	685
403296715	2	MSGF	817	Sequest	691
403296717	2	Mascot	947	Sequest	692
403296721	2	Mascot	948	Sequest	694
403296744	2	MSGF	821	Sequest	699
403297089	2	Mascot	964	MSGF	831
403297205	2	MSGF	834	Sequest	711
403297256	2	Maxquant	385	Sequest	715
403297332	2	Mascot	969	Sequest	716
403297617	2	MSGF	839	Sequest	718
403297991	2	Maxquant	389	Sequest	721
403298182	2	MSGF	846	Sequest	723
403298189	2	MSGF	847	Sequest	724
403298228	2	MSGF	849	Sequest	726
403298499	2	Mascot	987	MSGF	857
403298632	2	Maxquant	396	Mascot	992
403298703	2	Mascot	995	Sequest	734
403299394	2	Maxquant	402	Sequest	741
403299513	2	Mascot	1009	MSGF	873
403299649	2	Mascot	1014	MSGF	877
403299795	2	Mascot	1018	Sequest	746
403300123	2	Mascot	1026	Sequest	753
403300660	2	Maxquant	414	Mascot	1034
403300940	2	MSGF	895	Sequest	768
403301842	2	Mascot	1064	MSGF	905
403302104	2	MSGF	911	Sequest	783
403302240	2	MSGF	913	Sequest	786
403302246	2	MSGF	915	Sequest	788
403302783	2	MSGF	928	Sequest	798
403303032	2	Mascot	1093	MSGF	933
403303098	2	MSGF	935	Sequest	806
403303267	2	MSGF	937	Sequest	808
403303409	2	MSGF	938	Sequest	809
403303411	2	Mascot	1106	Sequest	810
403303762	2	Mascot	1114	MSGF	944
403303806	2	Maxquant	440	Mascot	1115
403304032	2	Mascot	1119	MSGF	947
403304038	2	Mascot	1120	Sequest	820
403304296	2	MSGF	952	Sequest	826
403304494	2	Sequest	828	Crux	340
403304514	2	MSGF	954	Sequest	829
403304547	2	Maxquant	445	Sequest	831
403304549	2	Mascot	1126	Sequest	832
403304777	2	Mascot	1135	Sequest	838
403305174	2	Maxquant	450	Mascot	1144
403305176	2	MSGF	965	Sequest	843
403305278	2	Sequest	849	Crux	344
403305707	2	Mascot	1157	Sequest	858
403305813	2	MSGF	981	Sequest	862
403305871	2	MSGF	982	Sequest	863
403306853	2	Maxquant	465	Sequest	872
403306896	2	MSGF	998	Sequest	874
403307118	2	Mascot	1183	MSGF	1008
403307281	2	MSGF	1009	Sequest	885
403307631	2	Maxquant	473	Sequest	889
403307790	2	Maxquant	474	Mascot	1190
403307792	2	MSGF	1016	Sequest	890
403307798	2	MSGF	1017	Crux	356
403307814	2	MSGF	1019	Sequest	892
403307819	2	Maxquant	476	MSGF	1020
403307829	2	MSGF	1021	Sequest	893
403307907	2	Maxquant	478	Sequest	894
403308090	2	Mascot	1197	Sequest	897
403308695	2	MSGF	1035	Sequest	910
403308840	2	Mascot	1216	MSGF	1038
403308871	2	MSGF	1039	Sequest	913
403308897	2	Mascot	1217	MSGF	1040
403309192	2	Maxquant	489	Mascot	1224
403309405	2	Maxquant	491	Mascot	1229
>PVP01_0007720.1-p1	2	Maxquant	500	Mascot	1256
>PVP01_0106700.1-p1	2	Maxquant	506	Mascot	1268
>PVP01_0112100.1-p1	2	Maxquant	513	MSGF	1099
>PVP01_0112600.1-p1	2	Maxquant	516	MSGF	1102
>PVP01_0201700.1-p1	2	Maxquant	527	MSGF	1118
>PVP01_0206700.1-p1	2	Maxquant	533	MSGF	1125
>PVP01_0213100.1-p1	2	Maxquant	537	Mascot	1315
>PVP01_0312100.1-p1	2	Maxquant	548	Mascot	1336
>PVP01_0417700.1-p1	2	Maxquant	575	Mascot	1372
>PVP01_0701100.1-p1	2	Maxquant	639	MSGF	1297
>PVP01_0722300.1-p1	2	Maxquant	669	Mascot	1513
>PVP01_0725200.1-p1	2	Maxquant	671	MSGF	1349
>PVP01_0908100.1-p1	2	Maxquant	752	Mascot	1629
>PVP01_1022500.1-p1	2	Maxquant	834	MSGF	1590
>PVP01_1113200.1-p1	2	Maxquant	861	MSGF	1637
>PVP01_1148700.1-p1	2	Maxquant	900	Mascot	1849
>PVP01_1203800.1-p1	2	Maxquant	908	Mascot	1858
>PVP01_1208400.1-p1	2	Maxquant	915	MSGF	1714
>PVP01_1212700.1-p1	2	Maxquant	925	Mascot	1876
>PVP01_1231400.1-p1	2	Maxquant	948	MSGF	1761
>PVP01_1233700.1-p1	2	Maxquant	952	Mascot	1910
>PVP01_1242700.1-p1	2	Maxquant	959	Mascot	1923
>PVP01_1305000.1-p1	2	Maxquant	1000	MSGF	1843
>PVP01_1329500.1-p1	2	Maxquant	1037	MSGF	1885
>PVP01_1402800.1-p1	2	Maxquant	1065	MSGF	1925
>PVP01_1404700.1-p1	2	Maxquant	1070	Mascot	2067
>PVP01_1407500.1-p1	2	Maxquant	1073	Mascot	2071
PVP01_0000160.1-p1	2	Mascot	1234	MSGF	1054
PVP01_0001500.1-p1	2	Mascot	1241	Crux	366
PVP01_0007000.1-p1	2	Mascot	1253	MSGF	1071
PVP01_0102600.1-p1	2	Mascot	1261	MSGF	1080
PVP01_0109300.1-p1	2	Mascot	1273	MSGF	1094
PVP01_0113100.1-p1	2	Mascot	1280	MSGF	1104
PVP01_0114300.1-p1	2	Mascot	1282	MSGF	1106
PVP01_0117400.1-p1	2	Mascot	1285	MSGF	1108
PVP01_0118400.1-p1	2	Mascot	1289	MSGF	1110
PVP01_0203700.1-p1	2	Mascot	1301	MSGF	1123
PVP01_0210500.1-p1	2	Mascot	1310	MSGF	1132
PVP01_0213400.1-p1	2	Mascot	1316	MSGF	1136
PVP01_0213500.1-p1	2	Mascot	1317	MSGF	1137
PVP01_0309700.1-p1	2	Mascot	1333	MSGF	1156
PVP01_0319600.1-p1	2	Mascot	1346	Crux	408
PVP01_0407000.1-p1	2	Mascot	1351	MSGF	1181
PVP01_0408300.1-p1	2	Mascot	1354	MSGF	1184
PVP01_0414000.1-p1	2	Mascot	1361	MSGF	1191
PVP01_0417400.1-p1	2	Mascot	1370	MSGF	1200
PVP01_0509900.1-p1	2	Mascot	1390	MSGF	1225
PVP01_0512600.1-p1	2	MSGF	1229	Crux	439
PVP01_0520000.1-p1	2	Mascot	1408	MSGF	1241
PVP01_0526600.1-p1	2	Mascot	1421	MSGF	1249
PVP01_0526900.1-p1	2	Mascot	1423	MSGF	1250
PVP01_0531200.1-p1	2	Sequest	1093	Crux	456
PVP01_0533100.1-p1	2	Mascot	1433	MSGF	1261
PVP01_0606900.1-p1	2	Mascot	1444	MSGF	1275
PVP01_0625000.1-p1	2	Mascot	1466	MSGF	1295
PVP01_0702700.1-p1	2	Mascot	1471	MSGF	1302
PVP01_0707500.1-p1	2	Mascot	1482	MSGF	1314
PVP01_0717800.1-p1	2	Mascot	1502	MSGF	1339
PVP01_0719100.1-p1	2	Mascot	1506	MSGF	1341
PVP01_0731800.1-p1	2	Mascot	1523	MSGF	1356
PVP01_0738500.1-p1	2	Mascot	1534	MSGF	1365
PVP01_0806700.1-p1	2	Mascot	1549	MSGF	1380
PVP01_0819500.1-p1	2	Mascot	1578	MSGF	1410
PVP01_0830300.1-p1	2	Mascot	1593	MSGF	1427
PVP01_0834900.1-p1	2	Mascot	1608	MSGF	1442
PVP01_0836000.1-p1	2	Mascot	1609	MSGF	1445
PVP01_0836700.1-p1	2	Mascot	1611	MSGF	1447
PVP01_0838200.1-p1	2	Mascot	1615	MSGF	1452
PVP01_0909300.1-p1	2	Mascot	1631	MSGF	1466
PVP01_0916000.1-p1	2	Mascot	1638	MSGF	1476
PVP01_0920000.1-p1	2	Mascot	1646	MSGF	1490
PVP01_0920600.1-p1	2	Mascot	1648	MSGF	1492
PVP01_0925300.1-p1	2	Mascot	1657	MSGF	1499
PVP01_0925900.1-p1	2	Mascot	1661	MSGF	1502
PVP01_0926500.1-p1	2	Mascot	1662	MSGF	1504
PVP01_0936900.1-p1	2	Mascot	1685	MSGF	1530
PVP01_0939700.1-p1	2	Mascot	1694	MSGF	1536
PVP01_1014200.1-p1	2	Mascot	1726	MSGF	1569
PVP01_1014400.1-p1	2	Mascot	1727	MSGF	1570
PVP01_1014700.1-p1	2	Mascot	1729	MSGF	1572
PVP01_1020100.1-p1	2	Mascot	1738	MSGF	1585
PVP01_1025700.1-p1	2	Mascot	1745	MSGF	1593
PVP01_1028100.1-p1	2	Mascot	1752	MSGF	1599
PVP01_1028500.1-p1	2	Mascot	1755	MSGF	1602
PVP01_1029300.1-p1	2	Mascot	1758	MSGF	1603
PVP01_1033800.1-p1	2	Mascot	1766	MSGF	1612
PVP01_1101500.1-p1	2	Mascot	1770	MSGF	1617
PVP01_1102600.1-p1	2	Mascot	1772	MSGF	1620
PVP01_1104500.1-p1	2	Mascot	1776	MSGF	1625
PVP01_1124900.1-p1	2	Mascot	1805	MSGF	1656
PVP01_1131600.1-p1	2	Mascot	1820	Crux	656
PVP01_1139600.1-p1	2	Mascot	1832	MSGF	1678
PVP01_1140400.1-p1	2	Mascot	1835	MSGF	1681
PVP01_1144100.1-p1	2	Sequest	1452	Crux	670
PVP01_1147600.1-p1	2	Mascot	1848	MSGF	1694
PVP01_1208300.1-p1	2	Mascot	1865	MSGF	1713
PVP01_1224100.1-p1	2	Mascot	1896	MSGF	1748
PVP01_1224500.1-p1	2	Mascot	1897	MSGF	1749
PVP01_1234200.1-p1	2	Mascot	1911	MSGF	1766
PVP01_1237900.1-p1	2	Mascot	1914	MSGF	1770
PVP01_1242100.1-p1	2	Mascot	1921	MSGF	1776
PVP01_1242200.1-p1	2	Mascot	1922	MSGF	1777
PVP01_1243700.1-p1	2	Mascot	1925	MSGF	1779
PVP01_1262500.1-p1	2	Mascot	1958	MSGF	1814
PVP01_1264700.1-p1	2	Mascot	1960	MSGF	1817
PVP01_1266300.1-p1	2	Mascot	1964	MSGF	1821
PVP01_1302200.1-p1	2	Mascot	1982	MSGF	1837
PVP01_1305400.1-p1	2	Mascot	1987	MSGF	1845
PVP01_1305900.1-p1	2	Mascot	1988	MSGF	1846
PVP01_1314000.1-p1	2	MSGF	1860	Crux	761
PVP01_1336300.1-p1	2	Mascot	2033	MSGF	1892
PVP01_1338200.1-p1	2	Mascot	2038	MSGF	1897
PVP01_1338600.1-p1	2	Mascot	2041	MSGF	1900
PVP01_1339600.1-p1	2	Mascot	2045	MSGF	1904
PVP01_1344900.1-p1	2	Mascot	2052	MSGF	1914
PVP01_1401600.1-p1	2	Mascot	2059	MSGF	1921
PVP01_1409200.1-p1	2	Mascot	2072	MSGF	1934
PVP01_1409400.1-p1	2	Mascot	2074	MSGF	1935
PVP01_1409900.1-p1	2	Sequest	1665	Crux	804
PVP01_1413800.1-p1	2	Mascot	2083	MSGF	1943
PVP01_1429100.1-p1	2	Mascot	2108	MSGF	1965
PVP01_1429500.1-p1	2	Mascot	2109	MSGF	1966
PVP01_1433600.1-p1	2	Mascot	2116	MSGF	1973
PVP01_1441600.1-p1	2	Mascot	2132	MSGF	1989
PVP01_1457500.1-p1	2	Mascot	2158	MSGF	2013
PVP01_1458100.1-p1	2	Mascot	2160	MSGF	2014
PVP01_1458800.1-p1	2	Mascot	2162	MSGF	2015
PVP01_1467500.1-p1	2	Mascot	2177	MSGF	2030
393281674	1	Mascot	4
403254012	1	MSGF	6
403254049	1	Mascot	8
403254053	1	MSGF	8
403254132	1	Mascot	10
403254174	1	Mascot	11
403254176	1	Maxquant	6
403254180	1	Mascot	12
403254223	1	Sequest	5
403254231	1	Sequest	6
403254365	1	MSGF	15
403254384	1	Maxquant	10
403254459	1	MSGF	18
403254571	1	Sequest	15
403254583	1	MSGF	22
403254639	1	MSGF	23
403254687	1	Maxquant	14
403254697	1	Sequest	17
403254770	1	Mascot	22
403254960	1	Mascot	25
403255033	1	Mascot	26
403255092	1	MSGF	30
403255199	1	MSGF	31
403255220	1	Mascot	28
403255256	1	Sequest	22
403255280	1	Maxquant	18
403255390	1	Mascot	31
403255403	1	Sequest	25
403255430	1	MSGF	35
403255455	1	Mascot	33
403255489	1	Mascot	35
403255536	1	Mascot	36
403255650	1	Mascot	39
403255925	1	Sequest	35
403255937	1	MSGF	44
403255973	1	Mascot	45
403256066	1	Mascot	47
403256101	1	Sequest	37
403256103	1	Mascot	48
403256122	1	Mascot	49
403256174	1	Mascot	50
403256189	1	MSGF	47
403256193	1	MSGF	48
403256210	1	Sequest	40
403256276	1	MSGF	51
403256334	1	MSGF	53
403256371	1	Mascot	56
403256376	1	MSGF	55
403256485	1	MSGF	56
403256487	1	Mascot	57
403256532	1	Mascot	58
403256703	1	MSGF	62
403256752	1	Sequest	50
403256756	1	Mascot	64
403256787	1	Mascot	66
403256903	1	Sequest	54
403256924	1	Mascot	68
403256938	1	Maxquant	35
403257006	1	MSGF	66
403257034	1	MSGF	68
403257057	1	Mascot	70
403257069	1	MSGF	69
403257085	1	Mascot	71
403257091	1	Crux	33
403257202	1	Sequest	57
403257205	1	Mascot	75
403257228	1	Mascot	76
403257313	1	MSGF	73
403257386	1	Sequest	59
403257388	1	Sequest	60
403257390	1	Mascot	78
403257401	1	MSGF	75
403257488	1	Mascot	80
403257528	1	MSGF	80
403257535	1	Mascot	83
403257537	1	Mascot	84
403257539	1	Sequest	65
403257565	1	Sequest	66
403257614	1	Mascot	85
403257698	1	Maxquant	40
403257700	1	MSGF	81
403257767	1	MSGF	82
403257817	1	Sequest	69
403257819	1	Sequest	70
403257871	1	Mascot	87
403257920	1	Mascot	89
403258058	1	MSGF	85
403258139	1	MSGF	88
403258161	1	Mascot	92
403258181	1	MSGF	90
403258183	1	MSGF	91
403258216	1	Crux	41
403258226	1	Mascot	95
403258276	1	Mascot	96
403258367	1	Mascot	98
403258383	1	Mascot	99
403258399	1	MSGF	94
403258419	1	Mascot	100
403258444	1	MSGF	95
403258454	1	Maxquant	44
403258464	1	Mascot	101
403258491	1	Mascot	102
403258538	1	Mascot	105
403258540	1	Mascot	106
403258552	1	Sequest	76
403258559	1	Mascot	107
403258564	1	Mascot	108
403258654	1	Mascot	110
403258658	1	Sequest	78
403258762	1	Sequest	80
403258781	1	Sequest	81
403258807	1	Mascot	112
403258819	1	MSGF	99
403258841	1	Maxquant	47
403258941	1	Mascot	114
403258975	1	Mascot	115
403259021	1	Mascot	116
403259023	1	Mascot	117
403259068	1	MSGF	101
403259078	1	Mascot	118
403259169	1	Maxquant	48
403259245	1	Maxquant	50
403259260	1	Mascot	122
403259371	1	MSGF	108
403259385	1	MSGF	109
403259410	1	Mascot	127
403259426	1	MSGF	112
403259466	1	Mascot	128
403259685	1	Mascot	132
403259689	1	Mascot	133
403259735	1	MSGF	116
403259799	1	Mascot	134
403259809	1	Mascot	136
403259902	1	MSGF	118
403259936	1	Sequest	95
403259958	1	Mascot	139
403260075	1	MSGF	124
403260077	1	MSGF	125
403260081	1	Mascot	142
403260096	1	Mascot	143
403260100	1	Mascot	144
403260104	1	MSGF	126
403260142	1	Sequest	98
403260168	1	Maxquant	61
403260207	1	Mascot	146
403260347	1	Crux	53
403260387	1	Sequest	101
403260389	1	MSGF	128
403260403	1	Mascot	148
403260407	1	Mascot	149
403260498	1	Mascot	153
403260502	1	MSGF	132
403260595	1	Mascot	158
403260611	1	Sequest	111
403260660	1	Mascot	161
403260675	1	Mascot	164
403260690	1	MSGF	143
403260745	1	Maxquant	73
403260747	1	Sequest	115
403260763	1	Maxquant	74
403260782	1	MSGF	145
403260784	1	Maxquant	76
403260814	1	MSGF	146
403260846	1	Mascot	167
403260866	1	Mascot	168
403260884	1	Sequest	118
403260917	1	Mascot	169
403260981	1	MSGF	148
403261112	1	Mascot	170
403261119	1	MSGF	151
403261121	1	MSGF	152
403261173	1	MSGF	154
403261194	1	MSGF	156
403261212	1	MSGF	157
403261407	1	Mascot	174
403261500	1	MSGF	159
403261554	1	Mascot	176
403261585	1	MSGF	162
403261587	1	Sequest	126
403261610	1	MSGF	163
403261614	1	MSGF	164
403261684	1	MSGF	166
403261688	1	Mascot	181
403261734	1	Mascot	183
403261794	1	Mascot	185
403261856	1	Mascot	188
403261864	1	MSGF	171
403261912	1	MSGF	172
403261919	1	Mascot	190
403261999	1	MSGF	175
403262047	1	Mascot	193
403262224	1	MSGF	180
403262513	1	MSGF	183
403262546	1	Mascot	200
403262551	1	Mascot	201
403262586	1	MSGF	184
403262588	1	Sequest	140
403262624	1	Mascot	203
403262636	1	Mascot	204
403262705	1	MSGF	187
403262738	1	Mascot	206
403262742	1	MSGF	188
403262865	1	Mascot	208
403262869	1	MSGF	190
403262877	1	Mascot	209
403262946	1	MSGF	192
403262954	1	Mascot	210
403262979	1	Mascot	211
403263046	1	Sequest	146
403263060	1	Mascot	213
403263212	1	Mascot	218
403263214	1	Mascot	219
403263218	1	Mascot	220
403263352	1	Maxquant	99
403263354	1	MSGF	200
403263388	1	Mascot	224
403263414	1	Sequest	153
403263467	1	MSGF	201
403263542	1	Maxquant	101
403263579	1	Mascot	226
403263622	1	Mascot	227
403263636	1	MSGF	204
403263721	1	MSGF	206
403263743	1	Sequest	157
403263745	1	Mascot	228
403263767	1	MSGF	207
403263773	1	MSGF	209
403263807	1	Mascot	231
403263850	1	MSGF	211
403263885	1	Mascot	233
403263888	1	Mascot	234
403263944	1	Sequest	162
403264006	1	Mascot	236
403264064	1	Mascot	238
403264076	1	Mascot	239
403264096	1	Sequest	163
403264198	1	Maxquant	105
403264212	1	Mascot	241
403264235	1	Mascot	242
403264352	1	MSGF	218
403264460	1	Sequest	172
403264482	1	Sequest	173
403264497	1	Mascot	247
403264501	1	Sequest	174
403264525	1	Mascot	248
403264557	1	Sequest	175
403264638	1	Mascot	250
403264654	1	Sequest	176
403264747	1	MSGF	225
403264871	1	Mascot	252
403264922	1	Sequest	180
403264933	1	Sequest	181
403265002	1	Sequest	184
403265004	1	Sequest	185
403265082	1	Mascot	256
403265125	1	Sequest	186
403265136	1	Mascot	257
403265158	1	MSGF	229
403265162	1	Mascot	259
403265181	1	Sequest	189
403265185	1	Mascot	260
403265187	1	Sequest	190
403265189	1	Sequest	191
403265205	1	MSGF	231
403265214	1	Sequest	193
403265218	1	Sequest	194
403265263	1	Mascot	264
403265300	1	MSGF	234
403265309	1	Sequest	198
403265339	1	MSGF	236
403265397	1	Mascot	268
403265411	1	Mascot	269
403265441	1	Maxquant	116
403265457	1	Mascot	270
403265461	1	Mascot	271
403265525	1	MSGF	240
403265529	1	Mascot	274
403265826	1	Maxquant	118
403265892	1	Mascot	276
403265962	1	MSGF	242
403266000	1	MSGF	243
403266072	1	Sequest	206
403266079	1	MSGF	246
403266093	1	Sequest	208
403266097	1	Mascot	281
403266103	1	MSGF	249
403266117	1	Mascot	282
403266127	1	Maxquant	123
403266214	1	MSGF	251
403266239	1	MSGF	253
403266299	1	Mascot	285
403266307	1	Sequest	211
403266313	1	Maxquant	126
403266353	1	Mascot	287
403266374	1	Mascot	288
403266510	1	Mascot	289
403266688	1	MSGF	256
403266698	1	MSGF	257
403266728	1	Mascot	293
403266753	1	Sequest	215
403266755	1	Sequest	216
403266761	1	Crux	99
403266763	1	Mascot	294
403266833	1	Sequest	218
403266837	1	MSGF	259
403266870	1	Mascot	296
403266929	1	MSGF	261
403266948	1	Sequest	222
403266966	1	Mascot	300
403266991	1	Mascot	301
403266995	1	MSGF	264
403267050	1	MSGF	265
403267163	1	MSGF	266
403267173	1	MSGF	267
403267183	1	MSGF	268
403267185	1	Sequest	223
403267187	1	Maxquant	134
403267217	1	Sequest	225
403267223	1	Crux	104
403267243	1	Mascot	303
403267265	1	MSGF	270
403267321	1	Mascot	306
403267399	1	MSGF	275
403267451	1	MSGF	277
403267507	1	Mascot	309
403267570	1	Mascot	310
403267698	1	Mascot	314
403267705	1	Mascot	315
403267742	1	Mascot	316
403267780	1	MSGF	283
403267863	1	MSGF	284
403268013	1	Mascot	318
403268017	1	Mascot	319
403268039	1	MSGF	287
403268073	1	Mascot	320
403268146	1	MSGF	291
403268168	1	MSGF	292
403268236	1	Sequest	237
403268285	1	Mascot	326
403268287	1	Mascot	327
403268475	1	MSGF	296
403268534	1	Mascot	329
403268539	1	Sequest	240
403268573	1	MSGF	298
403268621	1	Mascot	332
403268649	1	MSGF	301
403268662	1	Maxquant	149
403268777	1	Sequest	247
403268781	1	Sequest	249
403268879	1	Mascot	338
403268890	1	Mascot	339
403268939	1	MSGF	307
403268953	1	MSGF	308
403269168	1	Mascot	342
403269172	1	Mascot	343
403269196	1	MSGF	311
403269246	1	Mascot	344
403269255	1	Sequest	253
403269337	1	Mascot	345
403269389	1	Mascot	346
403269393	1	MSGF	312
403269454	1	Mascot	348
403269462	1	MSGF	315
403269485	1	MSGF	316
403269487	1	Mascot	349
403269506	1	Maxquant	158
403269512	1	Sequest	257
403269568	1	MSGF	319
403269662	1	MSGF	322
403269674	1	Sequest	260
403269713	1	Sequest	261
403269773	1	Sequest	262
403269806	1	Mascot	354
403269816	1	MSGF	323
403269827	1	Mascot	355
403269838	1	Maxquant	161
403269893	1	Sequest	263
403269910	1	MSGF	324
403269914	1	Sequest	264
403269936	1	MSGF	325
403270008	1	Mascot	356
403270128	1	Mascot	358
403270187	1	Mascot	359
403270207	1	MSGF	327
403270232	1	MSGF	328
403270344	1	Maxquant	162
403270350	1	MSGF	330
403270378	1	Mascot	363
403270385	1	MSGF	331
403270410	1	MSGF	332
403270438	1	MSGF	333
403270442	1	Mascot	364
403270466	1	Mascot	365
403270470	1	Mascot	366
403270485	1	MSGF	334
403270519	1	Mascot	367
403270527	1	Mascot	368
403270539	1	Mascot	369
403270545	1	Maxquant	163
403270607	1	Sequest	269
403270611	1	Sequest	270
403270631	1	Crux	125
403270633	1	Sequest	271
403270641	1	MSGF	335
403270649	1	Mascot	370
403270691	1	MSGF	337
403270713	1	MSGF	339
403270725	1	MSGF	341
403270727	1	MSGF	342
403270777	1	Sequest	282
403270810	1	Mascot	377
403270859	1	Mascot	378
403270958	1	Mascot	379
403271015	1	Mascot	381
403271023	1	Crux	130
403271040	1	Sequest	285
403271042	1	Sequest	286
403271067	1	Mascot	384
403271130	1	Mascot	385
403271150	1	Mascot	386
403271172	1	MSGF	353
403271180	1	Mascot	387
403271228	1	Maxquant	172
403271317	1	Sequest	291
403271395	1	Mascot	390
403271401	1	Sequest	294
403271421	1	Mascot	392
403271509	1	MSGF	357
403271578	1	MSGF	360
403271582	1	Mascot	396
403271632	1	Mascot	398
403271670	1	Sequest	302
403271672	1	Sequest	303
403271689	1	Mascot	400
403271700	1	Mascot	401
403271739	1	Maxquant	178
403271779	1	Mascot	403
403271783	1	Mascot	404
403271793	1	Mascot	405
403271868	1	Mascot	407
403271886	1	Sequest	306
403271969	1	MSGF	369
403271986	1	MSGF	370
403272022	1	MSGF	371
403272153	1	MSGF	373
403272232	1	Mascot	411
403272329	1	Mascot	414
403272342	1	Mascot	415
403272346	1	Mascot	416
403272348	1	Mascot	417
403272371	1	MSGF	378
403272408	1	MSGF	379
403272477	1	MSGF	383
403272537	1	Mascot	421
403272543	1	MSGF	384
403272555	1	Sequest	316
403272563	1	Mascot	423
403272689	1	Mascot	425
403272696	1	Sequest	319
403272702	1	MSGF	388
403272704	1	Sequest	320
403272722	1	Mascot	427
403272731	1	Mascot	428
403272835	1	MSGF	390
403272854	1	MSGF	391
403272859	1	Mascot	430
403272910	1	MSGF	393
403272943	1	Mascot	433
403273012	1	Sequest	324
403273025	1	MSGF	395
[truncated: 2,249 more rows]

## Sheet: Pvivax
Xrep	Accession	Protein Description	Avg. Xrep
5	PVP01_0000170.1	tryptophan-rich protein	1
5	PVP01_0004210.1	Early transcribed membrane protein	2.5
5	PVP01_0102700.1	conserved Plasmodium protein, unknown function	3
5	PVP01_0108700.1	heat shock protein 90, putative	3.25
5	PVP01_0110100.1	lysophospholipase, putative	1.75
5	PVP01_0112000.1	coatomer subunit epsilon, putative	1.25
5	PVP01_0112500.1	tyrosine--tRNA ligase, putative	1.5
5	PVP01_0113600.1	vacuolar proton translocating ATPase subunit A, putative	2
5	PVP01_0116400.1	proteasome subunit beta type-4, putative	2
5	PVP01_0119200.1	Plasmodium exported protein (PHIST), unknown function	2.5
5	PVP01_0119400.1	Plasmodium exported protein, unknown function	1.75
5	PVP01_0201100.1	tryptophan-rich protein	1
5	PVP01_0201200.1	Plasmodium exported protein, unknown function	1
5	PVP01_0201500.1	PIR protein	2.25
5	PVP01_0201600.1	PIR protein	1.5
5	PVP01_0201800.1	PIR protein	3
5	PVP01_0201900.1	PIR protein	2.25
5	PVP01_0203200.1	TatD-like deoxyribonuclease, putative	1
5	PVP01_0204400.1	chromatin assembly factor 1 protein WD40 domain, putative	2.25
5	PVP01_0206900.1	proteasome subunit beta type-3, putative	1.5
5	PVP01_0208500.1	calcium-transporting ATPase, putative	1.5
5	PVP01_0211800.1	aspartate--tRNA ligase, putative	2.25
5	PVP01_0213700.1	eukaryotic translation initiation factor 2 subunit alpha, putative	1.75
5	PVP01_0300700.1	Plasmodium exported protein, unknown function	2.75
5	PVP01_0301500.1	Plasmodium exported protein, unknown function	1
5	PVP01_0305500.1	V-type proton ATPase subunit B, putative	2.25
5	PVP01_0305600.1	sexual stage antigen s16, putative	2
5	PVP01_0305700.1	cytosolic glyoxalase II, putative	1.75
5	PVP01_0313500.1	serine--tRNA ligase, putative	2.25
5	PVP01_0315300.1	60S ribosomal protein L11a, putative	2
5	PVP01_0315400.1	40S ribosomal protein S10, putative	1
5	PVP01_0316800.1	conserved Plasmodium protein, unknown function	2.25
5	PVP01_0317100.1	conserved Plasmodium protein, unknown function	1.75
5	PVP01_0317300.1	40S ribosomal protein S5, putative	1.5
5	PVP01_0318900.1	conserved Plasmodium protein, unknown function	1
5	PVP01_0405000.1	liver stage antigen 3, putative	1.5
5	PVP01_0407900.1	ATP synthase F1, alpha subunit, putative	1.5
5	PVP01_0409300.1	DNA-directed RNA polymerase II subunit RPB2, putative	1
5	PVP01_0409900.1	acyl-CoA synthetase, putative	2.75
5	PVP01_0410900.1	T-complex protein 1 subunit theta, putative	2.25
5	PVP01_0411800.1	protein SIS1, putative	1.25
5	PVP01_0413100.1	asparagine--tRNA ligase, putative	2.25
5	PVP01_0414800.1	60S ribosomal protein L37ae, putative	1.5
5	PVP01_0415000.1	ATP-dependent RNA helicase UAP56, putative	2.5
5	PVP01_0415400.1	conserved protein, unknown function	1
5	PVP01_0417000.1	serine-repeat antigen 3 (SERA)	1.5
5	PVP01_0417200.1	serine-repeat antigen 5 (SERA)	3.25
5	PVP01_0417300.1	serine-repeat antigen 4 (SERA)	1.25
5	PVP01_0417600.1	serine-repeat antigen 5 (SERA)	1
5	PVP01_0417800.1	serine-repeat antigen (SERA)	1.75
5	PVP01_0419200.1	26S proteasome regulatory subunit RPN1, putative	2.25
5	PVP01_0420400.1	hexose transporter	1.5
5	PVP01_0422600.1	early transcribed membrane protein	2.5
5	PVP01_0422800.1	Plasmodium exported protein (PHIST), unknown function	2.75
5	PVP01_0423000.1	Plasmodium exported protein, unknown function	3.25
5	PVP01_0423300.1	hypothetical protein	1.25
5	PVP01_0503800.1	Plasmodium exported protein (PHIST), unknown function	2.75
5	PVP01_0507600.1	receptor for activated c kinase, putative	1.5
5	PVP01_0510500.1	DnaJ protein, putative	1.75
5	PVP01_0514400.1	U6 snRNA-associated Sm-like protein LSm3, putative	1
5	PVP01_0515400.1	heat shock protein 70, putative	3.25
5	PVP01_0517100.1	14-3-3 protein, putative	3
5	PVP01_0517600.1	rhoptry neck protein 5	1.5
5	PVP01_0517800.1	protein kinase c inhibitor-like protein, putative	2
5	PVP01_0518700.1	chaperone protein ClpB1, putative	1
5	PVP01_0519700.1	eukaryotic translation initiation factor 3 subunit G, putative	1.5
5	PVP01_0521500.1	arsenical pump-driving ATPase, putative	1.75
5	PVP01_0522400.1	60S ribosomal protein L15, putative	2.75
5	PVP01_0526200.1	small GTP-binding protein sar1, putative	1.5
5	PVP01_0526400.1	conserved Plasmodium protein, unknown function	2
5	PVP01_0527600.1	eukaryotic translation initiation factor 3 subunit M, putative	1.5
5	PVP01_0529000.1	ran-specific GTPase-activating protein 1, putative	3.25
5	PVP01_0530800.1	alpha tubulin 2, putative	2.75
5	PVP01_0532900.1	tryptophan-rich antigen	1.25
5	PVP01_0600900.1	Plasmodium exported protein, unknown function	1
5	PVP01_0601200.1	Plasmodium exported protein, unknown function	2
5	PVP01_0601500.1	Plasmodium exported protein (PHIST), unknown function	2.25
5	PVP01_0606100.1	ADP-ribosylation factor, putative	1.75
5	PVP01_0607700.1	citrate synthase, mitochondrial, putative	1
5	PVP01_0610000.1	conserved Plasmodium protein, unknown function	1
5	PVP01_0610500.1	conserved Plasmodium protein, unknown function	1
5	PVP01_0611900.1	40S ribosomal protein S2, putative	2
5	PVP01_0612400.1	merozoite capping protein 1, putative	2.5
5	PVP01_0612900.1	60S ribosomal protein L3, putative	2.75
5	PVP01_0614700.1	adenosine deaminase, putative	2.5
5	PVP01_0615600.1	26S proteasome regulatory subunit RPN9, putative	1
5	PVP01_0618500.1	haloacid dehalogenase-like hydrolase, putative	2
5	PVP01_0620800.1	conserved Plasmodium protein, unknown function	2
5	PVP01_0620900.1	hypothetical protein	1
5	PVP01_0621700.1	ADP/ATP transporter on adenylate translocase, putative	2
5	PVP01_0623100.1	Plasmodium exported protein, unknown function	1.75
5	PVP01_0701600.1	ras-related protein RAB7, putative	1.75
5	PVP01_0702100.1	alpha tubulin 1, putative	2.25
5	PVP01_0703200.1	replication protein A1, small fragment, putative	1.75
5	PVP01_0703300.1	copper-transporting ATPase, putative	1
5	PVP01_0703800.1	high molecular weight rhoptry protein 3	2.75
5	PVP01_0705800.1	conserved Plasmodium protein, unknown function	1
5	PVP01_0706200.1	subunit of proteaseome activator complex, putative	2.5
5	PVP01_0710400.1	inhibitor of cysteine proteases, putative	2.5
5	PVP01_0711800.1	conserved Plasmodium protein, unknown function	1
5	PVP01_0712600.1	phospholipid or glycerol acyltransferase, putative	1
5	PVP01_0713800.1	6-phosphofructokinase, putative	2
5	PVP01_0716400.1	glideosome-associated protein 50, putative	1.25
5	PVP01_0716700.1	eukaryotic translation initiation factor 3 subunit F, putative	2.5
5	PVP01_0717400.1	nucleosome assembly protein 1, putative	2.5
5	PVP01_0720600.1	ubiquitin-like protein, putative	1.5
5	PVP01_0720700.1	S-adenosylmethionine synthetase, putative	2
5	PVP01_0721000.1	phosphoglycerate kinase, putative	2.75
5	PVP01_0724400.1	conserved Plasmodium protein, unknown function	3
5	PVP01_0727900.1	high molecular weight rhoptry protein 2	2.75
5	PVP01_0730900.1	profilin, putative	2.75
5	PVP01_0731500.1	importin alpha re-exporter, putative	1
5	PVP01_0732300.1	mitochondrial-processing peptidase subunit beta, putative	1.25
5	PVP01_0733400.1	UBX domain, putative	1.25
5	PVP01_0734300.1	conserved Plasmodium protein, unknown function	1.5
5	PVP01_0735000.1	Plasmodium exported protein, unknown function	2.5
5	PVP01_0801100.1	Plasmodium exported protein, unknown function	1.5
5	PVP01_0801600.1	Plasmodium exported protein, unknown function	1.75
5	PVP01_0801700.1	STP1 protein	2.5
5	PVP01_0803300.1	40S ribosomal protein S20e, putative	1.25
5	PVP01_0803500.1	conserved Plasmodium protein, unknown function	1.75
5	PVP01_0803800.1	60S ribosomal protein L13, putative	2.25
5	PVP01_0805200.1	regulator of nonsense transcripts 1, putative	1.5
5	PVP01_0805900.1	DNA/RNA-binding protein Alba 3, putative	2.5
5	PVP01_0806500.1	single-strand telomeric DNA-binding protein GBP2, putative	2.75
5	PVP01_0807600.1	eukaryotic translation initiation factor 3 subunit D, putative	1.75
5	PVP01_0808100.1	26S protease regulatory subunit 4, putative	1.5
5	PVP01_0808400.1	tubulin beta chain, putative	3.25
5	PVP01_0808600.1	Plasmodium exported protein (PHIST), unknown function	1
5	PVP01_0808900.1	adenylate kinase, putative	1.5
5	PVP01_0810800.1	dolichyl-phosphate-mannose protein mannosyltransferase, putative	1.75
5	PVP01_0811500.1	proteasome subunit beta type-5, putative	2.25
5	PVP01_0811900.1	PRE-binding protein, putative	1.75
5	PVP01_0812500.1	hypoxanthine-guanine phosphoribosyltransferase, putative	2
5	PVP01_0814200.1	conserved Plasmodium protein, unknown function	1.75
5	PVP01_0815300.1	cysteine--tRNA ligase, putative	1.75
5	PVP01_0815700.1	heat shock protein 60, putative	2.75
5	PVP01_0816000.1	enolase, putative	3.25
5	PVP01_0816400.1	conserved Plasmodium protein, unknown function	2.25
5	PVP01_0817300.1	40S ribosomal protein S3A, putative	2.5
5	PVP01_0818200.1	peptidyl-prolyl cis-trans isomerase, putative	2
5	PVP01_0819300.1	histone H2A variant, putative	2.5
5	PVP01_0819400.1	ATP-dependent RNA helicase DDX6, putative	2.75
5	PVP01_0819900.1	T-complex protein 1 subunit epsilon, putative	2.75
5	PVP01_0820100.1	protein transport protein SEC22, putative	1.75
5	PVP01_0822500.1	40S ribosomal protein S11, putative	2.5
5	PVP01_0823300.1	40S ribosomal protein S15A, putative	2.5
5	PVP01_0825000.1	eukaryotic translation initiation factor 4E, putative	1.5
5	PVP01_0829900.1	phosphoglycerate mutase, putative	1.75
5	PVP01_0830600.1	60S acidic ribosomal protein P2, putative	2.25
5	PVP01_0830700.1	asparagine synthetase [glutamine-hydrolyzing], putative	1.5
5	PVP01_0832000.1	T-complex protein 1, eta subunit, putative	1.5
5	PVP01_0833000.1	60S ribosomal protein L7, putative	1.5
5	PVP01_0833400.1	T-complex protein 1 subunit beta, putative	1.75
5	PVP01_0833800.1	FAD-dependent glycerol-3-phosphate dehydrogenase, putative	1.5
5	PVP01_0834000.1	activator of Hsp90 ATPase, putative	1.5
5	PVP01_0834500.1	ubiquitin-conjugating enzyme E2, putative	1.25
5	PVP01_0837200.1	N-ethylmaleimide-sensitive fusion protein, putative	1.5
5	PVP01_0837300.1	exportin-1, putative	2.5
5	PVP01_0838100.1	Plasmodium exported protein, unknown function	1.5
5	PVP01_0903900.1	60S acidic ribosomal protein P1, putative	2.5
5	PVP01_0905200.1	thioredoxin, putative	2.5
5	PVP01_0905800.1	histone H4, putative	3.25
5	PVP01_0905900.1	histone 2B, putative	2.75
5	PVP01_0906200.1	40S ribosomal protein S4, putative	2.75
5	PVP01_0906400.1	translocon component PTEX88, putative	2
5	PVP01_0906600.1	conserved Apicomplexan protein, unknown function	1.5
5	PVP01_0909200.1	casein kinase 2, alpha subunit, putative	1.25
5	PVP01_0909400.1	endoplasmic reticulum-resident calcium binding protein, putative	2.5
5	PVP01_0909500.1	DnaJ domain containing protein	1.5
5	PVP01_0910700.1	60S ribosomal protein L36, putative	1.5
5	PVP01_0911200.1	asparagine-rich antigen, putative	1
5	PVP01_0914200.1	ubiquitin domain-containing protein DSK2, putative	2
5	PVP01_0916400.1	peptidyl-prolyl cis-trans isomerase 11, putative	1.5
5	PVP01_0917000.1	guanine nucleotide-exchange factor SEC12, putative	1
5	PVP01_0917400.1	heat shock protein 101, putative	2.5
5	PVP01_0918300.1	GTP-binding nuclear protein RAN/TC4, putative	2.25
5	PVP01_0918800.1	heat shock protein 90, putative	2
5	PVP01_0918900.1	insulinase, putative	1.25
5	PVP01_0920500.1	conserved Plasmodium protein, unknown function	1.25
5	PVP01_0920700.1	phosphoglycerate mutase, putative	2.5
5	PVP01_0922200.1	exported protein 1	2
5	PVP01_0924000.1	translation elongation factor EF-1, subunit alpha, putative	1.5
5	PVP01_0924100.1	conserved Plasmodium protein, unknown function	2.25
5	PVP01_0925200.1	ethanolamine kinase, putative	2
5	PVP01_0925600.1	60S ribosomal protein L35, putative	1.75
5	PVP01_0926900.1	40S ribosomal protein S18, putative	2.5
5	PVP01_0927800.1	deoxyuridine 5'-triphosphate nucleotidohydrolase, putative	1
5	PVP01_0928300.1	CRAL/TRIO domain-containing protein, putative	2.25
5	PVP01_0928900.1	prefoldin subunit 5, putative	1
5	PVP01_0929700.1	spermidine synthase, putative	1.5
5	PVP01_0930700.1	60S ribosomal protein L38, putative	2
5	PVP01_0930800.1	60S ribosomal protein P0, putative	2.5
5	PVP01_0931200.1	26S protease regulatory subunit 6A, putative	1.75
5	PVP01_0933000.1	T-complex protein 1, alpha subunit, putative	2.5
5	PVP01_0933600.1	aquaglyceroporin, putative	1
5	PVP01_0934200.1	apical membrane antigen 1	1.75
5	PVP01_0934800.1	heat shock protein 70, putative	2.75
5	PVP01_0934900.1	protein disulfide isomerase, putative	1
5	PVP01_0935900.1	protein phosphatase PPM8, putative	2
5	PVP01_0937200.1	tudor staphylococcal nuclease, putative	2.75
5	PVP01_0937400.1	casein kinase 1, putative	1.5
5	PVP01_0938300.1	CLPTM1 domain-containing protein, putative	1
5	PVP01_0939500.1	protein phosphatase PPM2, putative	1.25
5	PVP01_0943200.1	60S ribosomal protein L28, putative	1.75
5	PVP01_0944700.1	40S ribosomal protein S21, putative	1
5	PVP01_0945800.1	coatomer subunit gamma, putative	1.5
5	PVP01_0946100.1	dynamin-like protein, putative	1.75
5	PVP01_0948700.1	tryptophan-rich antigen	1
5	PVP01_0949000.1	tryptophan-rich protein	3
5	PVP01_1003700.1	phosphoenolpyruvate/phosphate translocator, putative	1.25
5	PVP01_1005600.1	eukaryotic translation initiation factor 3 subunit E, putative	1.5
5	PVP01_1006300.1	Hsc70-interacting protein, putative	1
5	PVP01_1006700.1	ubiquitin-conjugating enzyme E2 N, putative	1.75
5	PVP01_1008700.1	acyl-CoA synthetase, putative	2.75
5	PVP01_1013000.1	adenosylhomocysteinase, putative	1.75
5	PVP01_1014500.1	40S ribosomal protein S24, putative	1.25
5	PVP01_1016300.1	eukaryotic translation initiation factor 3 subunit B, putative	2.75
5	PVP01_1016700.1	serine/arginine-rich splicing factor 1, putative	1.5
5	PVP01_1017000.1	60S ribosomal protein L12, putative	1.25
5	PVP01_1017100.1	60S ribosomal protein L2, putative	3
5	PVP01_1017800.1	40S ribosomal protein S11, putative	3
5	PVP01_1018100.1	BolA-like protein, putative	1
5	PVP01_1018300.1	conserved Plasmodium protein, unknown function	1.75
5	PVP01_1020600.1	purine nucleoside phosphorylase, putative	2.75
5	PVP01_1023000.1	translationally-controlled tumor protein homolog, putative	1.25
5	PVP01_1026200.1	conserved Plasmodium protein, unknown function	1
5	PVP01_1026900.1	60S ribosomal protein L4, putative	2.5
5	PVP01_1028200.1	small ubiquitin-related modifier, putative	2
5	PVP01_1031600.1	merozoite surface protein 3	2
5	PVP01_1033400.1	rhoptry-associated protein 2	1.5
5	PVP01_1033600.1	skeleton-binding protein 1, putative	3
5	PVP01_1033900.1	tryptophan-rich antigen	1
5	PVP01_1101300.1	Plasmodium exported protein, unknown function	1.5
5	PVP01_1101700.1	conserved Plasmodium protein, unknown function	2.75
5	PVP01_1103800.1	ABC transporter E family member 1, putative	1.5
5	PVP01_1104300.1	alanine--tRNA ligase, putative	2.5
5	PVP01_1105500.1	nucleoside diphosphate kinase, putative	1.25
5	PVP01_1108100.1	reticulon-like protein, putative	1
5	PVP01_1110100.1	proliferating cell nuclear antigen 1, putative	2.25
5	PVP01_1110200.1	conserved Plasmodium protein, unknown function	2
5	PVP01_1111200.1	falcilysin, putative	2.75
5	PVP01_1113100.1	40S ribosomal protein S15, putative	1.75
5	PVP01_1114100.1	T-complex protein 1, delta subunit, putative	1.75
5	PVP01_1114800.1	elongation factor 1-alpha, putative	3.25
5	PVP01_1116400.1	serine/threonine protein phosphatase 5, putative	1
5	PVP01_1117800.1	proteasome subunit alpha type-7, putative	2
5	PVP01_1120400.1	nicotinate phosphoribosyltransferase, putative	2
5	PVP01_1122700.1	pyruvate kinase, putative	2.5
5	PVP01_1122800.1	conserved protein, unknown function	1.25
5	PVP01_1123500.1	conserved Plasmodium protein, unknown function	2
5	PVP01_1125500.1	hexokinase, putative	2.25
5	PVP01_1128300.1	pyridoxine biosynthesis protein PDX1, putative	2.25
5	PVP01_1130000.1	acyl-CoA synthetase, putative	1.5
5	PVP01_1131000.1	malate dehydrogenase, putative	2
5	PVP01_1131200.1	60S ribosomal protein L27a, putative	2.5
5	PVP01_1131900.1	conserved Plasmodium protein, unknown function	2
5	PVP01_1132300.1	malate:quinone oxidoreductase, putative	1.5
5	PVP01_1133100.1	pyridoxal kinase, putative	1
5	PVP01_1135200.1	myosin E, putative	1.5
5	PVP01_1137000.1	eukaryotic translation initiation factor 3 subunit L, putative	1
5	PVP01_1138400.1	transketolase, putative	2.5
5	PVP01_1140100.1	ornithine aminotransferase, putative	2.25
5	PVP01_1142000.1	translation initiation factor IF-2, putative	1
5	PVP01_1142200.1	coatomer alpha subunit, putative	2.25
5	PVP01_1142400.1	polypyrimidine tract-binding protein, putative	1.5
5	PVP01_1143000.1	long chain polyunsaturated fatty acid elongation enzyme, putative	1.75
5	PVP01_1147400.1	Plasmodium exported protein, unknown function	3.25
5	PVP01_1147500.1	Plasmodium exported protein, unknown function	1.75
5	PVP01_1201400.1	Plasmodium exported protein (PHIST), unknown function	1.25
5	PVP01_1201600.1	Plasmodium exported protein, unknown function	2.5
5	PVP01_1201700.1	hypothetical protein	2.5
5	PVP01_1202300.1	thioredoxin-related protein, putative	2.5
5	PVP01_1203000.1	conserved Plasmodium protein, unknown function	1.75
5	PVP01_1203200.1	glycerol kinase, putative	1
5	PVP01_1203300.1	60S ribosomal protein L17, putative	2.25
5	PVP01_1205600.1	glutamate--tRNA ligase, putative	1.5
5	PVP01_1205700.1	nucleoside diphosphate hydrolase, putative	1.5
5	PVP01_1207300.1	DNA/RNA-binding protein Alba 4, putative	2.5
5	PVP01_1208500.1	DNA/RNA-binding protein Alba 2, putative	1.75
5	PVP01_1208700.1	protein transport protein SEC61 subunit alpha, putative	1.5
5	PVP01_1209000.1	conserved Plasmodium protein, unknown function	1.25
5	PVP01_1209700.1	thioredoxin 2, putative	2.5
5	PVP01_1210600.1	heat shock protein 110, putative	2.25
5	PVP01_1211800.1	phosphoethanolamine N-methyltransferase	1.75
5	PVP01_1212000.1	phosphoenolpyruvate carboxykinase, putative	1.5
5	PVP01_1212800.1	40S ribosomal protein S6, putative	1.5
5	PVP01_1213600.1	60S ribosomal protein L18a, putative	2.25
5	PVP01_1216400.1	elongation factor 1-gamma, putative	2.5
5	PVP01_1216500.1	60S ribosomal protein L6-2, putative	2.5
5	PVP01_1216600.1	26S proteasome regulatory subunit RPN3, putative	1.75
5	PVP01_1219300.1	MSP7-like protein	1
5	PVP01_1219600.1	MSP7-like protein	1.75
5	PVP01_1219700.1	MSP7-like protein	1
5	PVP01_1220400.1	MSP7-like protein	2.75
5	PVP01_1221300.1	conserved Plasmodium protein, unknown function	1.25
5	PVP01_1221700.1	20 kDa chaperonin, putative	1.5
5	PVP01_1221800.1	isoleucine--tRNA ligase, putative	1.5
5	PVP01_1222800.1	60S ribosomal protein L23, putative	2.25
5	PVP01_1222900.1	glutamine--tRNA ligase, putative	2.25
5	PVP01_1223300.1	signal peptidase 21 kDa subunit, putative	1
5	PVP01_1226300.1	proteasome subunit beta type-7, putative	1.25
5	PVP01_1229400.1	lactate dehydrogenase, putative	2.25
5	PVP01_1229500.1	phosphoribosylpyrophosphate synthetase	2.25
5	PVP01_1229700.1	L-lactate dehydrogenase	2.75
5	PVP01_1231500.1	60S ribosomal protein L6, putative	2
5	PVP01_1235700.1	exported protein 2, putative	2.25
5	PVP01_1238100.1	eukaryotic initiation factor 4a, putative	3
5	PVP01_1238700.1	conserved Plasmodium protein, unknown function	1.5
5	PVP01_1240900.1	40S ribosomal protein S3, putative	2.25
5	PVP01_1243600.1	replication factor C subunit 3, putative	1
5	PVP01_1244000.1	glyceraldehyde-3-phosphate dehydrogenase, putative	2.75
5	PVP01_1244100.1	cytochrome c1 precursor, putative	1
5	PVP01_1245500.1	40S ribosomal protein S28e, putative	2.5
5	PVP01_1246100.1	60S ribosomal protein L27, putative	2
5	PVP01_1249600.1	conserved Plasmodium protein, unknown function	2
5	PVP01_1249700.1	thioredoxin 1, putative	2.75
5	PVP01_1250100.1	V-type H(+)-translocating pyrophosphatase, putative	2.25
5	PVP01_1252600.1	aminopeptidase P, putative	2
5	PVP01_1253200.1	glucose-6-phosphate dehydrogenase-6-phosphogluconolactonase, putative	1
5	PVP01_1253300.1	co-chaperone p23, putative	1.5
5	PVP01_1255200.1	sortilin, putative	1.5
5	PVP01_1255900.1	elongation factor 2, putative	3
5	PVP01_1259100.1	multidrug resistance protein 2, putative	2.25
5	PVP01_1260000.1	40S ribosomal protein S5, putative	2
5	PVP01_1260800.1	M17 leucyl aminopeptidase, putative	2.5
5	PVP01_1261100.1	ATP-dependent RNA helicase DDX5, putative	2
5	PVP01_1261300.1	conserved Plasmodium protein, unknown function	1
5	PVP01_1262200.1	fructose 1,6-bisphosphate aldolase, putative	2.5
5	PVP01_1265800.1	60S ribosomal protein L1, putative	2.25
5	PVP01_1265900.1	KS1 protein precursor, putative	1.75
5	PVP01_1267200.1	vesicle-associated membrane protein, putative	1.25
5	PVP01_1268100.1	thioredoxin peroxidase 1, putative	2.5
5	PVP01_1268400.1	conserved Plasmodium protein, unknown function	1
5	PVP01_1268900.1	translocation protein sec62, putative	1.25
5	PVP01_1269800.1	trailer hitch homolog, putative	2.5
5	PVP01_1271300.1	40 kDa heat shock protein, putative	1.25
5	PVP01_1271400.1	Plasmodium exported protein, unknown function	2.5
5	PVP01_1272400.1	PIR protein	2
5	PVP01_1303000.1	nucleosome assembly protein, putative	1.5
5	PVP01_1303500.1	eukaryotic translation initiation factor 5A, putative	1.75
5	PVP01_1305300.1	eukaryotic translation initiation factor 3 subunit C, putative	2.25
5	PVP01_1311000.1	polyubiquitin 5, putative	2.25
5	PVP01_1311200.1	glutathione peroxidase-like thioredoxin peroxidase, putative	1.25
5	PVP01_1311600.1	HSP40, subfamily A, putative	3
5	PVP01_1311800.1	succinyl-CoA ligase, putative	1.25
5	PVP01_1312500.1	N-acetyltransferase, putative	1
5	PVP01_1313200.1	translocon component PTEX150, putative	2
5	PVP01_1313800.1	ataxin-2 like protein, putative	1.25
5	PVP01_1314700.1	mitochondrial acidic protein MAM33, putative	1.5
5	PVP01_1315200.1	Hsp70/Hsp90 organizing protein, putative	2.25
5	PVP01_1317400.1	voltage-dependent anion-selective channel protein, putative	1.5
5	PVP01_1317700.1	60S ribosomal protein L14, putative	2
5	PVP01_1317800.1	succinyl-CoA ligase [ADP-forming] subunit beta, putative	1.5
5	PVP01_1319600.1	coatamer protein, beta subunit, putative	1.5
5	PVP01_1321000.1	proliferation-associated protein 2g4, putative	2.5
5	PVP01_1321400.1	conserved Plasmodium protein, unknown function	2.75
5	PVP01_1322800.1	ABC transporter G family member 2, putative	1.5
5	PVP01_1323200.1	basic transcription factor 3b, putative	1.5
5	PVP01_1323300.1	60S ribosomal protein L21, putative	1.25
5	PVP01_1323600.1	conserved Plasmodium protein, unknown function	1.75
5	PVP01_1324700.1	60S ribosomal protein L7-3, putative	2
5	PVP01_1327700.1	40S ribosomal protein S25, putative	2.5
5	PVP01_1328500.1	glycine--tRNA ligase, putative	1.75
5	PVP01_1329100.1	glutathione reductase, putative	2.25
5	PVP01_1332400.1	NADP-specific glutamate dehydrogenase, putative	2
5	PVP01_1333600.1	RNA-binding protein Nova-1, putative	1.75
5	PVP01_1334600.1	60S ribosomal protein L10, putative	1.25
5	PVP01_1336400.1	actin II	1.75
5	PVP01_1336600.1	nuclear transport factor 2, putative	1.5
5	PVP01_1338500.1	rhoptry-associated protein 1	2.75
5	PVP01_1339000.1	cytidine diphosphate-diacylglycerol synthase, putative	1
5	PVP01_1339100.1	CUGBP Elav-like family member 2, putative	2.25
5	PVP01_1340400.1	40S ribosomal protein S8e, putative	2.75
5	PVP01_1340900.1	plasmepsin IV, putative	2.75
5	PVP01_1343200.1	ribonucleoside-diphosphate reductase small chain, putative	2
5	PVP01_1343900.1	conserved Plasmodium protein, unknown function	1
5	PVP01_1344700.1	cytochrome c, putative	1.75
5	PVP01_1345600.1	conserved Plasmodium protein, unknown function	1
5	PVP01_1346500.1	26S proteasome regulatory subunit RPN6, putative	1
5	PVP01_1401400.1	cytoadherence linked asexual protein, CLAG, putative	1.75
5	PVP01_1402100.1	Plasmodium exported protein, unknown function	2
5	PVP01_1402200.1	Plasmodium exported protein, unknown function	2.25
5	PVP01_1402700.1	Plasmodium exported protein, unknown function	3
5	PVP01_1403000.1	gametocyte associated protein, putative	1
5	PVP01_1404100.1	SNARE protein, putative	1
5	PVP01_1406200.1	conserved Plasmodium protein, unknown function	2.25
5	PVP01_1407300.1	26S protease regulatory subunit 10B, putative	1.5
5	PVP01_1410100.1	60S ribosomal protein L24, putative	2.25
5	PVP01_1412500.1	26S protease regulatory subunit 7, putative	1.25
5	PVP01_1412800.1	M1-family alanyl aminopeptidase, putative	2.5
5	PVP01_1412900.1	V-type proton ATPase catalytic subunit A, putative	1.75
5	PVP01_1413600.1	2-oxoisovalerate dehydrogenase subunit alpha, mitochondrial, putative	1.5
5	PVP01_1416800.1	exportin-T, putative	1.25
5	PVP01_1418700.1	40S ribosomal protein S19, putative	3.25
5	PVP01_1419700.1	translocation protein SEC63, putative	2.25
5	PVP01_1420800.1	golgi protein 1, putative	2
5	PVP01_1421400.1	ras-related protein Rab-11A, putative	1
5	PVP01_1425500.1	superoxide dismutase [Fe], putative	2.5
5	PVP01_1426100.1	DNA/RNA-binding protein Alba 1, putative	3
5	PVP01_1426300.1	60S ribosomal protein L13, putative	2.75
5	PVP01_1426400.1	40S ribosomal protein S16, putative	1.75
5	PVP01_1426900.1	conserved Plasmodium protein, unknown function	2.25
5	PVP01_1427000.1	conserved Plasmodium protein, unknown function	2
5	PVP01_1427800.1	karyopherin alpha, putative	1.75
5	PVP01_1428200.1	conserved Plasmodium protein, unknown function	1
5	PVP01_1428700.1	conserved Plasmodium protein, unknown function	1
5	PVP01_1429700.1	ATP-dependent RNA helicase DBP1, putative	2
5	PVP01_1430300.1	acyl-CoA binding protein, putative	1.75
5	PVP01_1431600.1	eukaryotic translation initiation factor 3 subunit A, putative	2.75
5	PVP01_1432600.1	proline--tRNA ligase, putative	1.5
5	PVP01_1433800.1	thioredoxin peroxidase 2, putative	2.25
5	PVP01_1434100.1	10 kDa chaperonin, putative	2.5
5	PVP01_1435000.1	glycerol-3-phosphate dehydrogenase, putative	1.25
5	PVP01_1435300.1	male development gene 1, putative	2.5
5	PVP01_1437900.1	clathrin heavy chain, putative	1.75
5	PVP01_1438400.1	zinc finger protein, putative	1.5
5	PVP01_1440500.1	endoplasmin, putative	3
5	PVP01_1440900.1	glideosome-associated protein 45, putative	1
5	PVP01_1441300.1	CAMP-dependent protein kinase regulatory subunit, putative	1.5
5	PVP01_1442500.1	polyadenylate-binding protein, putative	2.5
5	PVP01_1444000.1	ubiquitin-activating enzyme E1, putative	1.25
5	PVP01_1444300.1	haloacid dehalogenase-like hydrolase, putative	2
5	PVP01_1444500.1	haloacid dehalogenase-like hydrolase, putative	2
5	PVP01_1446800.1	merozoite surface protein 9	2.5
5	PVP01_1447400.1	conserved Plasmodium protein, unknown function	1
5	PVP01_1447500.1	macrophage migration inhibitory factor, putative	2.5
5	PVP01_1448400.1	vacuolar transporter chaperone, putative	1
5	PVP01_1450300.1	60 kDa chaperonin, putative	2.5
5	PVP01_1453800.1	ATP synthase subunit beta, mitochondrial, putative	3
5	PVP01_1455500.1	conserved Plasmodium protein, unknown function	1
5	PVP01_1455800.1	conserved protein, unknown function	2
5	PVP01_1456900.1	acyl-CoA synthetase, putative	1
5	PVP01_1459800.1	40S ribosomal protein S17, putative	2.5
5	PVP01_1459900.1	rab GDP dissociation inhibitor beta, putative	1.75
5	PVP01_1461700.1	ADP-ribosylation factor GTPase-activating protein, putative	1.5
5	PVP01_1463500.1	myosin A tail domain interacting protein, putative	2.25
5	PVP01_1466600.1	cutA, putative	1
5	PVP01_1467200.1	osmiophilic body protein G377, putative	3.25
5	PVP01_1469200.1	rhoptry neck protein 3, putative	2
4	PVP01_0000130.1	tryptophan-rich antigen	1.33333
4	PVP01_0000140.1	tryptophan-rich antigen	1
4	PVP01_0001440.1	plasmodium exported protein (PHIST), unknown function	3
4	PVP01_0004250.1	hypothetical protein	1.33333
4	PVP01_0103700.1	erythrocyte membrane-associated antigen, putative	2.25
4	PVP01_0104800.1	E3 ubiquitin-protein ligase, putative	1.33333
4	PVP01_0105900.1	40S ribosomal protein S29, putative	1
4	PVP01_0106200.1	importin-7, putative	1
4	PVP01_0107900.1	E3 ubiquitin-protein ligase, putative	1
4	PVP01_0109100.1	heat shock protein 110, putative	3
4	PVP01_0112200.1	plasmepsin X, putative	1
4	PVP01_0202200.1	tryptophan-rich protein	2
4	PVP01_0209100.1	asparagine-rich antigen, putative	1
4	PVP01_0216700.1	Plasmodium exported protein, unknown function	3
4	PVP01_0311300.1	DNA polymerase alpha catalytic subunit A, putative	1
4	PVP01_0312600.1	eukaryotic translation initiation factor 3 subunit I, putative	2.33333
4	PVP01_0317400.1	secreted ookinete protein, putative	1.66667
4	PVP01_0405400.1	replication factor C subunit 1, putative	1.33333
4	PVP01_0407200.1	40S ribosomal protein S26, putative	3
4	PVP01_0414700.1	conserved Plasmodium protein, unknown function	1.66667
4	PVP01_0416900.1	serine-repeat antigen 4 (SERA)	1.66667
4	PVP01_0506500.1	protein disulfide isomerase, putative	3
4	PVP01_0508200.1	E3 ubiquitin-protein ligase, putative	1.33333
4	PVP01_0511700.1	protein transport protein SEC23, putative	2
4	PVP01_0513600.1	2-oxoglutarate dehydrogenase E1 component, mitochondrial precursor, putative	1.66667
4	PVP01_0520100.1	26S protease regulatory subunit 6B, putative	1.66667
4	PVP01_0522700.1	Plasmodium exported protein (PHIST), unknown function	1
4	PVP01_0530900.1	40S ribosomal protein S19, putative	2.66667
4	PVP01_0532300.1	early transcribed membrane protein	3
4	PVP01_0602700.1	conserved Plasmodium protein, unknown function	1
4	PVP01_0604600.1	60S ribosomal protein L30e, putative	1.66667
4	PVP01_0606800.1	deoxyribose-phosphate aldolase, putative	2.33333
4	PVP01_0607100.1	PHAX domain-containing protein, putative	1
4	PVP01_0618300.1	early transcribed membrane protein	1.33333
4	PVP01_0620000.1	methionine--tRNA ligase, putative	1.66667
4	PVP01_0622100.1	enhancer of rudimentary homolog, putative	1
4	PVP01_0623800.1	duffy binding protein	1
4	PVP01_0702300.1	60S ribosomal protein L32, putative	1
4	PVP01_0702800.1	signal peptidase complex subunit 3, putative	1
4	PVP01_0703000.1	ubiquitin specific protease, putative	1
4	PVP01_0708300.1	small nuclear ribonucleoprotein Sm D3, putative	1
4	PVP01_0710800.1	alkaline phosphatase, putative	1.33333
4	PVP01_0710900.1	SAP domain-containing protein, putative	1
4	PVP01_0711600.1	elongation factor 1B, putative	1.66667
4	PVP01_0716300.1	heat shock protein 70, putative	2.5
4	PVP01_0718200.1	TLD domain-containing protein	1
4	PVP01_0719200.1	inosine-5'-monophosphate dehydrogenase, putative	1.66667
4	PVP01_0720400.1	conserved Plasmodium protein, unknown function	1
4	PVP01_0728900.1	merozoite surface protein 1	2.33333
4	PVP01_0733200.1	V-type proton ATPase subunit E, putative	1.33333
4	PVP01_0802700.1	conserved Plasmodium protein, unknown function	1
4	PVP01_0803400.1	inner membrane complex protein 1c, putative	2
4	PVP01_0803600.1	U5 small nuclear ribonuclear protein, putative	1
4	PVP01_0807400.1	transcription factor with AP2 domain(s), putative	1.33333
4	PVP01_0810700.1	eukaryotic translation initiation factor 2 subunit beta, putative	1.66667
4	PVP01_0812700.1	GMP synthase [glutamine-hydrolyzing], putative	2
4	PVP01_0814700.1	transcriptional coactivator ADA2, putative	1.33333
4	PVP01_0820600.1	elongation factor 1 (EF-1), putative	1
4	PVP01_0823400.1	protein YOP1, putative	1.33333
4	PVP01_0827400.1	60S ribosomal protein L26, putative	2.33333
4	PVP01_0827900.1	26S proteasome regulatory subunit RPN12, putative	1
4	PVP01_0831100.1	conserved Plasmodium protein, unknown function	1
4	PVP01_0833100.1	40S ribosomal protein S12, putative	2
4	PVP01_0833900.1	glutaredoxin 1, putative	1.66667
4	PVP01_0836500.1	lipoamide acyltransferase component of branched- chain alpha-keto acid dehydrogenase complex, putative	1
4	PVP01_0838300.1	Plasmodium exported protein, unknown function	1
4	PVP01_0904500.1	casein kinase II beta chain, putative	2
4	PVP01_0904600.1	CCR4-NOT transcription complex subunit 1, putative	1.33333
4	PVP01_0914500.1	glyoxalase I, putative	1
4	PVP01_0917900.1	conserved Plasmodium protein, unknown function	1.66667
4	PVP01_0925800.1	conserved Apicomplexan protein, unknown function	1.33333
4	PVP01_0926700.1	threonine--tRNA ligase, putative	1.66667
4	PVP01_0929100.1	ATP-dependent 6-phosphofructokinase, putative	1
4	PVP01_0929800.1	parasitophorous vacuolar protein 1, putative	3
4	PVP01_0936800.1	3-oxo-5-alpha-steroid 4-dehydrogenase, putative	1
4	PVP01_0939100.1	ubiquitin-related modifier 1, putative	1.33333
4	PVP01_0943300.1	60S ribosomal protein L35ae, putative	2
4	PVP01_0943500.1	conserved Plasmodium protein, unknown function	1
4	PVP01_0945600.1	ras-related protein Rab-6, putative	1
4	PVP01_1006600.1	ubiquitin carboxyl-terminal hydrolase 14, putative	1
4	PVP01_1006800.1	DNA replication licensing factor MCM3, putative	1
4	PVP01_1009900.1	karyopherin beta, putative	3
4	PVP01_1010900.1	multidrug resistance protein 1, putative	3
4	PVP01_1012200.1	ATP-dependent RNA helicase DDX1, putative	1
4	PVP01_1013900.1	40S ribosomal protein S9, putative	1.66667
4	PVP01_1015600.1	proteasome subunit beta type-1, putative	1
4	PVP01_1020200.1	6-cysteine protein	3
4	PVP01_1021300.1	ras-related protein Rab-1B, putative	1.33333
4	PVP01_1022200.1	inositol-3-phosphate synthase, putative	3
4	PVP01_1026400.1	cell differentiation protein, putative	1
4	PVP01_1026500.1	subtilisin-like protease 1	1.66667
4	PVP01_1030500.1	actin-depolymerizing factor 1, putative	2.33333
4	PVP01_1031100.1	merozoite surface protein 3	1
4	PVP01_1032600.1	merozoite surface protein 8, putative	2.33333
4	PVP01_1103900.1	26S proteasome regulatory subunit RPN11, putative	1.33333
4	PVP01_1106100.1	ubiquitin-60S ribosomal protein L40, putative	2
4	PVP01_1110900.1	protein transport protein Sec24A, putative	1.66667
4	PVP01_1112500.1	CUGBP Elav-like family member 1, putative	1
4	PVP01_1114000.1	pyrroline carboxylate reductase, putative	1.66667
4	PVP01_1121200.1	choline/ethanolaminephosphotransferase, putative	1.66667
4	PVP01_1122000.1	protein DJ-1, putative	2.33333
4	PVP01_1125900.1	conserved Plasmodium protein, unknown function	1
4	PVP01_1126700.1	leucine--tRNA ligase, putative	1.33333
4	PVP01_1127700.1	nascent polypeptide-associated complex subunit alpha, putative	2.33333
4	PVP01_1128400.1	conserved Plasmodium protein, unknown function	1
4	PVP01_1130100.1	cell division cycle protein 48 homologue, putative	3
4	PVP01_1131700.1	histone H2A, putative	2.33333
4	PVP01_1133500.1	conserved Plasmodium protein, unknown function	1
4	PVP01_1140200.1	T-complex protein 1 subunit zeta, putative	2.33333
4	PVP01_1142100.1	glutaredoxin-like protein	1.66667
4	PVP01_1201500.1	Plasmodium exported protein (PHIST), unknown function	1
4	PVP01_1204700.1	lysine--tRNA ligase, putative	2.66667
4	PVP01_1207100.1	ethanolamine-phosphate cytidylyltransferase, putative	1.33333
4	PVP01_1208000.1	6-cysteine protein	2.66667
4	PVP01_1209100.1	isocitrate dehydrogenase [NADP], mitochondrial, putative	1.66667
4	PVP01_1212200.1	myosin A, putative	1
4	PVP01_1230700.1	protein BCP1, putative	1
4	PVP01_1232700.1	conserved Plasmodium protein, unknown function	1.33333
4	PVP01_1233600.1	DnaJ protein, putative	1
4	PVP01_1235900.1	proteasome subunit beta type-2, putative	1
4	PVP01_1240500.1	26S proteasome regulatory subunit RPN2, putative	1
4	PVP01_1244900.1	valine--tRNA ligase, putative	2.33333
4	PVP01_1246400.1	ubiquitin carboxyl-terminal hydrolase isozyme L3, putative	1.66667
4	PVP01_1250200.1	conserved Plasmodium protein, unknown function	1
4	PVP01_1252300.1	6-phosphogluconate dehydrogenase, decarboxylating, putative	2.33333
4	PVP01_1256900.1	signal recognition particle subunit SRP54, putative	1
4	PVP01_1260400.1	centrin-2, putative	1.66667
4	PVP01_1261900.1	histidine--tRNA ligase, putative	1.66667
4	PVP01_1264100.1	protein transport protein SEC7, putative	1
4	PVP01_1267100.1	triosephosphate isomerase, putative	3
4	PVP01_1267600.1	cytochrome b-c1 complex subunit Rieske, putative	1
4	PVP01_1269500.1	conserved Plasmodium protein, unknown function	1
4	PVP01_1301500.1	mitochondrial phosphate carrier protein, putative	1
4	PVP01_1302800.1	threonylcarbamoyl-AMP synthase, putative	1
4	PVP01_1310600.1	DnaJ domain containing protein	1
4	PVP01_1311100.1	non-SERCA-type Ca2+ -transporting P-ATPase, putative	1.33333
4	PVP01_1312300.1	ribonucleoside-diphosphate reductase large subunit, putative	1
4	PVP01_1313500.1	glucose-6-phosphate isomerase, putative	1
4	PVP01_1314200.1	NAD(P)H-dependent glutamate synthase, putative	1.33333
4	PVP01_1324800.1	60S ribosomal protein L5, putative	2
4	PVP01_1326600.1	conserved Plasmodium protein, unknown function	1.33333
4	PVP01_1328700.1	tetratricopeptide repeat protein, putative	1
4	PVP01_1329600.1	glutathione S-transferase, putative	1
4	PVP01_1334500.1	serine/threonine protein phosphatase PP1, putative	1
4	PVP01_1338300.1	eukaryotic translation initiation factor 2 subunit gamma, putative	2.33333
4	PVP01_1339300.1	conserved Plasmodium protein, unknown function	1.66667
4	PVP01_1346200.1	ubiquitin-40S ribosomal protein S27a, putative	1
4	PVP01_1401300.1	Plasmodium exported protein, unknown function	1.33333
4	PVP01_1403700.1	40S ribosomal protein S7, putative	1.66667
4	PVP01_1412300.1	ATP synthase subunit gamma, mitochondrial, putative	1.33333
4	PVP01_1422800.1	conserved Plasmodium protein, unknown function	1
4	PVP01_1423100.1	histone H2B variant, putative	1
4	PVP01_1425200.1	importin beta, putative	1
4	PVP01_1428900.1	conserved protein, unknown function	1
4	PVP01_1431400.1	glycerol-3-phosphate 1-O-acyltransferase, putative	1
4	PVP01_1447600.1	T-complex protein 1 subunit gamma, putative	3
4	PVP01_1453700.1	serine hydroxymethyltransferase	1.33333
4	PVP01_1455100.1	SUMO-activating enzyme subunit 2, putative	1
4	PVP01_1456200.1	calcyclin binding protein, putative	1
4	PVP01_1462200.1	kinesin-13, putative	1
4	PVP01_1463200.1	actin	3
4	PVP01_1464500.1	peptidyl-prolyl cis-trans isomerase FKBP35, putative	1.66667
4	PVP01_1465600.1	bax inhibitor 1, putative	1
4	PVP01_1466000.1	26S protease regulatory subunit 8, putative	1.66667
4	PVP01_1466200.1	conserved Plasmodium protein, unknown function	1
4	PVP01_1469500.1	hypothetical protein	3
4	PVP01_1469800.1	tryptophan-rich antigen	1
4	PVP01_1469900.1	tryptophan-rich antigen	1.33333
4	PVP01_1470000.1	Plasmodium exported protein, unknown function	1.33333
4	PVP01_1470200.1	Plasmodium exported protein, unknown function	1.66667
4	PVP01_1471200.1	PIR protein	1
4	PVP01_1471500.1	Plasmodium exported protein, unknown function	1
3	PVP01_0000160.1	tryptophan-rich protein	1
3	PVP01_0001500.1	PIR protein	1
3	PVP01_0106700.1	conserved Plasmodium protein, unknown function	1.5
3	PVP01_0109300.1	chloroquine resistance transporter, putative	1
3	PVP01_0111000.1	60S ribosomal protein L34, putative	1
3	PVP01_0112100.1	ubiquitin regulatory protein, putative	1.5
3	PVP01_0112600.1	26S proteasome regulatory subunit RPN10, putative	1
3	PVP01_0113100.1	ras-related protein Rab-18, putative	1
3	PVP01_0117400.1	serine/threonine protein phosphatase 2B catalytic subunit A, putative	1
3	PVP01_0118200.1	glutamate dehydrogenase, putative	1
3	PVP01_0118400.1	mannose-6-phosphate isomerase, putative	1
3	PVP01_0201700.1	PIR protein	1
3	PVP01_0203700.1	UMP-CMP kinase, putative	1
3	PVP01_0206700.1	conserved Plasmodium protein, unknown function	1
3	PVP01_0210500.1	StAR-related lipid transfer protein, putative	1.5
3	PVP01_0213100.1	proteasome subunit alpha type-5, putative	1
3	PVP01_0214900.1	1-cys peroxiredoxin	1
3	PVP01_0217200.1	Plasmodium exported protein, unknown function	1
3	PVP01_0319600.1	RNA-binding protein, putative	1
3	PVP01_0407000.1	replication factor C subunit 2, putative	1
3	PVP01_0414000.1	conserved Plasmodium protein, unknown function	1
3	PVP01_0417700.1	serine-repeat antigen (SERA)	1
3	PVP01_0421700.1	conserved Plasmodium protein, unknown function	1
3	PVP01_0509900.1	nucleoside transporter 2, putative	1
3	PVP01_0512600.1	60S ribosomal protein L22, putative	1
3	PVP01_0520000.1	phosphoglucomutase-2, putative	1
3	PVP01_0526600.1	bifunctional dihydrofolate reductase-thymidylate synthase, putative	1
3	PVP01_0526900.1	memo-like protein	1
3	PVP01_0531200.1	eukaryotic initiation factor 4A-III, putative	2
3	PVP01_0533100.1	tryptophan-rich antigen	1.5
3	PVP01_0625000.1	PIR protein	1
3	PVP01_0713500.1	SUMO-conjugating enzyme UBC9, putative	1
3	PVP01_0722300.1	thioredoxin reductase, putative	1
3	PVP01_0725200.1	glutamine-dependent NAD(+) synthetase, putative	1
3	PVP01_0726300.1	cytochrome c oxidase subunit 5B, putative	1
3	PVP01_0731800.1	conserved Plasmodium protein, unknown function	1
3	PVP01_0816900.1	conserved protein, unknown function	1
3	PVP01_0819500.1	signal peptidase complex subunit SPC2, putative	1
3	PVP01_0823100.1	proteasome subunit alpha type-3, putative	1.33333
3	PVP01_0823500.1	formate-nitrite transporter, putative	1
3	PVP01_0833200.1	40S ribosomal protein S23, putative	1
3	PVP01_0834900.1	conserved Plasmodium protein, unknown function	1
3	PVP01_0836000.1	EH domain-containing protein, putative	1
3	PVP01_0838200.1	Plasmodium exported protein (PHIST), unknown function	1
3	PVP01_0908100.1	polyadenylate-binding protein-interacting protein 1, putative	1
3	PVP01_0909300.1	succinyl-CoA synthetase alpha subunit, putative	1.5
3	PVP01_0916000.1	vivapain-2	1
3	PVP01_0925900.1	conserved Plasmodium protein, unknown function	1
3	PVP01_0926500.1	kelch domain-containing protein, putative	1
3	PVP01_0939700.1	conserved Plasmodium protein, unknown function	1
3	PVP01_1014400.1	carbon catabolite repressor protein 4, putative	1
3	PVP01_1014700.1	V-type proton ATPase 16 kDa proteolipid subunit, putative	1
3	PVP01_1020100.1	ras-related protein Rab-1A, putative	1
3	PVP01_1025700.1	triose phosphate transporter, putative	1
3	PVP01_1028300.1	conserved Plasmodium protein, unknown function	1.33333
3	PVP01_1028500.1	DNA mismatch repair protein MSH6, putative	1
3	PVP01_1033800.1	tryptophan-rich antigen	1
3	PVP01_1101500.1	Plasmodium exported protein, unknown function	1
3	PVP01_1104500.1	NADH-cytochrome b5 reductase, putative	1
3	PVP01_1131600.1	histone H3 variant, putative	1.5
3	PVP01_1140400.1	proteasome subunit alpha type-2, putative	1
3	PVP01_1147600.1	Plasmodium exported protein, unknown function	1
3	PVP01_1148700.1	PIR protein	1
3	PVP01_1203800.1	phosphatidylinositol transfer protein, putative	1
3	PVP01_1208400.1	conserved Plasmodium protein, unknown function	1
3	PVP01_1213400.1	60S ribosomal protein L18-2, putative	3
3	PVP01_1224100.1	ER lumen protein retaining receptor 1, putative	1
3	PVP01_1231200.1	60S ribosomal protein L23, putative	1
3	PVP01_1231400.1	V-type proton ATPase subunit G, putative	1
3	PVP01_1233700.1	GTPase-activating protein, putative	1
3	PVP01_1242100.1	vacuolar ATP synthase subunit d, putative	2
3	PVP01_1242200.1	serine/threonine protein phosphatase UIS2, putative	1
3	PVP01_1255000.1	rhoptry neck protein 2	1
3	PVP01_1302200.1	high mobility group protein B1, putative	2
3	PVP01_1305000.1	conserved protein, unknown function	1
3	PVP01_1305900.1	conserved Plasmodium protein, unknown function	1
3	PVP01_1325300.1	conserved Plasmodium protein, unknown function	1
3	PVP01_1336900.1	p1/s1 nuclease, putative	1
3	PVP01_1338200.1	conserved Plasmodium protein, unknown function	1.5
3	PVP01_1339600.1	conserved Plasmodium protein, unknown function	1
3	PVP01_1401600.1	Plasmodium exported protein, unknown function	1
3	PVP01_1404700.1	conserved Plasmodium protein, unknown function	1.5
3	PVP01_1409200.1	carbamoyl phosphate synthetase, putative	2
3	PVP01_1411600.1	ras-related protein Rab-5B, putative	1
3	PVP01_1413800.1	eukaryotic translation initation factor 4 gamma, putative	1.5
3	PVP01_1429100.1	ER membrane protein complex subunit 1, putative	1
3	PVP01_1429500.1	hydroxymethyldihydropterin pyrophosphokinase-dihydropteroate synthase, putative	1
3	PVP01_1433600.1	conserved Plasmodium protein, unknown function	1.5
3	PVP01_1438700.1	cell cycle associated protein, putative	1
3	PVP01_1441600.1	phospholipid-transporting ATPase, putative	1
3	PVP01_1458100.1	3-hydroxyisobutyryl-coenzyme A hydrolase, putative	1
3	PVP01_1458800.1	replication factor C subunit 4, putative	2
2	PVP01_0002330.1	PIR protein	1
2	PVP01_0004010.1	PIR protein	2
2	PVP01_0004920.1	PIR protein	1
2	PVP01_0005160.1	PIR protein	1
2	PVP01_0007000.1	PIR protein	1
2	PVP01_0007720.1	PIR protein	1
2	PVP01_0010240.1	PIR protein	1
2	PVP01_0102600.1	conserved Plasmodium protein, unknown function	1
2	PVP01_0104500.1	conserved Plasmodium protein, unknown function	1
2	PVP01_0105600.1	DNA replication licensing factor MCM7, putative	1
2	PVP01_0105700.1	inositol-phosphate phosphatase, putative	1
2	PVP01_0112900.1	proteasome subunit alpha type-6, putative	1
2	PVP01_0114300.1	C-mannosyltransferase, putative	1
2	PVP01_0118000.1	1-cys peroxiredoxin	1
2	PVP01_0118700.1	nucleolar protein 10, putative	1
2	PVP01_0121700.1	PIR protein	1
2	PVP01_0213400.1	conserved Plasmodium protein, unknown function	1
2	PVP01_0213500.1	cation transporting ATPase, putative	1
2	PVP01_0309700.1	exosome complex component RRP4, putative	2
2	PVP01_0312100.1	conserved Plasmodium protein, unknown function	1
2	PVP01_0406400.1	conserved Plasmodium protein, unknown function	2
2	PVP01_0408300.1	autophagy-related protein 11, putative	1
2	PVP01_0417100.1	serine-repeat antigen 1 (SERA)	1
2	PVP01_0417400.1	serine-repeat antigen 4 (SERA)	1
2	PVP01_0418500.1	adenylosuccinate lyase	2
2	PVP01_0506200.1	leucine--tRNA ligase, putative	1
2	PVP01_0511400.1	conserved Plasmodium protein, unknown function	1
2	PVP01_0600400.1	PIR protein	1
2	PVP01_0602200.1	DNA polymerase delta catalytic subunit, putative	1
2	PVP01_0602300.1	rhoptry neck protein 12, putative	1
2	PVP01_0606900.1	conserved Plasmodium protein, unknown function	1.5
2	PVP01_0619000.1	ubiquitin-conjugating enzyme, putative	1
2	PVP01_0620400.1	hypothetical protein	1
2	PVP01_0701100.1	reticulocyte binding protein 1b	1
2	PVP01_0702700.1	conserved Plasmodium protein, unknown function	1
2	PVP01_0707500.1	conserved Plasmodium protein, unknown function	1
2	PVP01_0708600.1	exportin-7, putative	1
2	PVP01_0711300.1	26S proteasome regulatory subunit RPN8, putative	1
2	PVP01_0717500.1	DnaJ protein, putative	1
2	PVP01_0717800.1	protein disulfide isomerase, putative	1.5
2	PVP01_0719100.1	conserved Plasmodium protein, unknown function	1
2	PVP01_0725800.1	fumarate hydratase, putative	1
2	PVP01_0736900.1	PIR protein	1
2	PVP01_0738500.1	Plasmodium exported protein, unknown function	1
2	PVP01_0801000.1	hypothetical protein	1
2	PVP01_0806700.1	conserved membrane protein, unknown function	1
2	PVP01_0817100.1	conserved Plasmodium protein, unknown function	1
2	PVP01_0822300.1	26S proteasome non-ATPase regulatory subunit 9, putative	1
2	PVP01_0822400.1	CPSF (cleavage and polyadenylation specific factor), subunit A, putative	1
2	PVP01_0830300.1	conserved Plasmodium protein, unknown function	1
2	PVP01_0831300.1	splicing factor 3B subunit 1, putative	1
2	PVP01_0834700.1	conserved Plasmodium protein, unknown function	1
2	PVP01_0835800.1	60S ribosomal protein L44, putative	1
2	PVP01_0836700.1	spindle pole body protein, putative	1
2	PVP01_0915600.1	conserved Plasmodium protein, unknown function	1
2	PVP01_0916600.1	rhoptry neck protein 4	1
2	PVP01_0920000.1	ubiquitin-protein ligase, putative	1
2	PVP01_0920600.1	conserved Plasmodium protein, unknown function	1
2	PVP01_0921700.1	conserved Plasmodium protein, unknown function	1
2	PVP01_0922300.1	protein GCN20, putative	2
2	PVP01_0925300.1	GrpE protein homolog, mitochondrial, putative	1
2	PVP01_0926000.1	DNA-directed RNA polymerase, putative	1
2	PVP01_0936900.1	conserved Plasmodium protein, unknown function	1
2	PVP01_0939400.1	guanylyl cyclase, putative	2
2	PVP01_1010800.1	mitochondrial-processing peptidase subunit alpha, putative	1
2	PVP01_1011500.1	conserved Plasmodium protein, unknown function	1
2	PVP01_1014200.1	conserved Plasmodium protein, unknown function	1
2	PVP01_1022500.1	RNA pseudouridylate synthase, putative	1.5
2	PVP01_1028100.1	conserved Plasmodium protein, unknown function	1
2	PVP01_1029300.1	centrosomal protein CEP120, putative	1
2	PVP01_1100200.1	PIR protein	1
2	PVP01_1102600.1	conserved Plasmodium protein, unknown function	1
2	PVP01_1113200.1	YOP1-like protein, putative	1
2	PVP01_1114400.1	DNA helicase, putative	1
2	PVP01_1116700.1	RAP protein, putative	1
2	PVP01_1117900.1	proteasome subunit alpha type-4, putative	1
2	PVP01_1121400.1	HECT-domain (ubiquitin-transferase), putative	2
2	PVP01_1124900.1	SNF2 helicase, putative	1.5
2	PVP01_1138700.1	histone H3, putative	1
2	PVP01_1139600.1	conserved Plasmodium protein, unknown function	1
2	PVP01_1144100.1	RAP protein, putative	1
2	PVP01_1208300.1	conserved Plasmodium protein, unknown function	1.5
2	PVP01_1212700.1	aconitate hydratase, putative	1
2	PVP01_1217800.1	tryptophan--tRNA ligase, putative	1
2	PVP01_1220000.1	MSP7-like protein	1
2	PVP01_1224500.1	thioredoxin, putative	1.5
2	PVP01_1225000.1	conserved Plasmodium protein, unknown function	3
2	PVP01_1225900.1	alpha/beta-hydrolase, putative	1
2	PVP01_1234200.1	protein disulfide-isomerase, putative	1
2	PVP01_1237900.1	conserved Plasmodium protein, unknown function	1
2	PVP01_1242700.1	conserved Plasmodium protein, unknown function	1
2	PVP01_1243700.1	conserved Plasmodium protein, unknown function	1
2	PVP01_1247100.1	bax inhibitor 1, putative	1
2	PVP01_1247200.1	pyridoxal 5'-phosphate synthase, putative	1
2	PVP01_1254000.1	conserved Plasmodium protein, unknown function	1
2	PVP01_1258000.1	gamete egress and sporozoite traversal protein, putative	1
2	PVP01_1262500.1	serine/threonine protein kinase, putative	1
2	PVP01_1264700.1	tRNA import protein tRIP, putative	1
2	PVP01_1266300.1	clathrin coat assembly protein AP50, putative	1
2	PVP01_1272300.1	PIR protein	2
2	PVP01_1301900.1	conserved protein, unknown function	2
2	PVP01_1304600.1	zinc finger protein, putative	1
2	PVP01_1305400.1	conserved Plasmodium protein, unknown function	1
2	PVP01_1307300.1	cysteine repeat modular protein 3, putative	1
2	PVP01_1314000.1	conserved Plasmodium protein, unknown function	1
2	PVP01_1315300.1	calmodulin, putative	1
2	PVP01_1329500.1	conserved Plasmodium protein, unknown function	1
2	PVP01_1332800.1	protein SEY1, putative	1
2	PVP01_1336300.1	deoxyhypusine synthase, putative	1
2	PVP01_1338600.1	WD repeat-containing protein, putative	1
2	PVP01_1341600.1	rRNA 2'-O-methyltransferase fibrillarin, putative	1
2	PVP01_1344900.1	serine/threonine protein phosphatase CPPED1, putative	1
2	PVP01_1402800.1	Plasmodium exported protein, unknown function	1
2	PVP01_1407500.1	V-type proton ATPase subunit H, putative	1
2	PVP01_1408100.1	DnaJ protein, putative	1
2	PVP01_1409400.1	conserved Plasmodium protein, unknown function	2.5
2	PVP01_1409900.1	mRNA-decapping enzyme 2, putative	1.5
2	PVP01_1427700.1	RNA-binding protein, putative	1
2	PVP01_1437400.1	arginine--tRNA ligase, putative	1
2	PVP01_1457500.1	conserved Plasmodium protein, unknown function	1
2	PVP01_1467500.1	conserved Plasmodium protein, unknown function	1
2	PVP01_1471900.1	Plasmodium exported protein (PHIST), unknown function	1
2	PVP01_1472500.1	PIR protein	1
1	PVP01_0000210.1	tryptophan-rich protein	1
1	PVP01_0000300.1	PIR protein	1
1	PVP01_0000360.1	PIR protein	1
1	PVP01_0000580.1	PIR protein	1
1	PVP01_0000820.1	PIR protein	2
1	PVP01_0000940.1	PIR protein	1
1	PVP01_0001330.1	PIR protein	1
1	PVP01_0001710.1	PIR protein	1
1	PVP01_0001790.1	PIR protein	1
1	PVP01_0002080.1	Plasmodium exported protein, unknown function	1
1	PVP01_0002350.1	Plasmodium exported protein, unknown function	1
1	PVP01_0002400.1	PIR protein	2
1	PVP01_0002640.1	Plasmodium exported protein, unknown function	1
1	PVP01_0002710.1	PIR protein	1
1	PVP01_0002950.1	PIR protein	1
1	PVP01_0003100.1	PIR protein	1
1	PVP01_0003290.1	PIR protein	2
1	PVP01_0003350.1	PIR protein	2
1	PVP01_0003430.1	PIR protein	1
1	PVP01_0004180.1	PIR protein	1
1	PVP01_0004950.1	PIR protein	1
1	PVP01_0005000.1	PIR protein	1
1	PVP01_0005070.1	Plasmodium exported protein, unknown function	1
1	PVP01_0005350.1	PIR protein	1
1	PVP01_0005520.1	PIR protein	1
1	PVP01_0005540.1	PIR protein	1
1	PVP01_0005570.1	PIR protein	1
1	PVP01_0006630.1	Plasmodium exported protein, unknown function	1
1	PVP01_0007140.1	PIR protein	1
1	PVP01_0007190.1	Plasmodium exported protein, unknown function	2
1	PVP01_0007290.1	PIR protein	2
1	PVP01_0007300.1	PIR protein	1
1	PVP01_0007410.1	PIR protein	1
1	PVP01_0007660.1	PIR protein	1
1	PVP01_0007660.1	PIR protein	1
1	PVP01_0007720.1	PIR protein	2
1	PVP01_0008240.1	PIR protein	1
1	PVP01_0008450.1	PIR protein	1
1	PVP01_0008600.1	Plasmodium exported protein, unknown function	2
1	PVP01_0008680.1	Plasmodium exported protein, unknown function	1
1	PVP01_0008720.1	PIR protein	1
1	PVP01_0008930.1	PIR protein	1
1	PVP01_0008930.1	PIR protein	1
1	PVP01_0009040.1	PIR protein	1
1	PVP01_0009220.1	PIR protein	2
1	PVP01_0009580.1	PIR protein	1
1	PVP01_0009740.1	PIR protein	1
1	PVP01_0010060.1	PIR protein	1
1	PVP01_0010590.1	PIR protein	1
1	PVP01_0010980.1	PIR protein	1
1	PVP01_0101900.1	PIR protein	1
1	PVP01_0103700.1	erythrocyte membrane-associated antigen, putative	8
1	PVP01_0104400.1	tRNA m5C-methyltransferase, putative	1
1	PVP01_0105300.1	conserved Plasmodium protein, unknown function	1
1	PVP01_0107500.1	rhoptry-associated membrane antigen, putative	1
1	PVP01_0109000.1	cloroquine resistance associated protein Cg8, putative	1
1	PVP01_0110400.1	conserved Plasmodium protein, unknown function	1
1	PVP01_0110500.1	conserved Plasmodium protein, unknown function	3
1	PVP01_0116000.1	conserved Plasmodium protein, unknown function	1
1	PVP01_0116100.1	methionine aminopeptidase 1c, putative	1
1	PVP01_0116600.1	conserved Plasmodium protein, unknown function	1
1	PVP01_0117800.1	conserved Plasmodium protein, unknown function	1
1	PVP01_0204600.1	bromodomain protein, putative	1
1	PVP01_0205300.1	phenylalanine--tRNA ligase alpha subunit, putative	1
1	PVP01_0206100.1	photosensitized INA-labeled protein PHIL1, putative	1
1	PVP01_0206300.1	secreted ookinete protein, putative	2
1	PVP01_0207700.1	conserved Plasmodium protein, unknown function	1
1	PVP01_0209000.1	conserved Plasmodium protein, unknown function	1
1	PVP01_0209600.1	RAP protein, putative	1
1	PVP01_0210400.1	ubiquitin carboxyl-terminal hydrolase 1, putative	2
1	PVP01_0211400.1	conserved Plasmodium protein, unknown function	1
1	PVP01_0212000.1	DNA mismatch repair protein PMS1, putative	1
1	PVP01_0212200.1	ubiquitin carboxyl-terminal hydrolase, putative	1
1	PVP01_0212400.1	conserved Plasmodium protein, unknown function	1
1	PVP01_0212600.1	mitochondrial import inner membrane translocase subunit TIM50, putative	1
1	PVP01_0213200.1	conserved Plasmodium protein, unknown function	1
1	PVP01_0213800.1	conserved Plasmodium membrane protein, unknown function	2
1	PVP01_0214600.1	RNA-binding protein, putative	1
1	PVP01_0214800.1	conserved Plasmodium protein, unknown function	1
1	PVP01_0215600.1	dynein heavy chain, putative	1
1	PVP01_0216200.1	conserved Plasmodium protein, unknown function	1
1	PVP01_0217900.1	PIR protein	1
1	PVP01_0219200.1	Plasmodium exported protein, unknown function	2
1	PVP01_0220700.1	PIR protein	1
1	PVP01_0221600.1	PIR protein	1
1	PVP01_0300400.1	PIR protein	1
1	PVP01_0302100.1	Plasmodium exported protein (PHIST), unknown function	1
1	PVP01_0302800.1	conserved Plasmodium protein, unknown function	1
1	PVP01_0303400.1	transcription factor with AP2 domain(s), putative	1
1	PVP01_0304400.1	ATP-dependent RNA helicase DDX51	1
1	PVP01_0306000.1	conserved Plasmodium protein, unknown function	1
1	PVP01_0307100.1	conserved Plasmodium protein, unknown function	1
1	PVP01_0307400.1	conserved Plasmodium protein, unknown function	1
1	PVP01_0308200.1	tRNA N6-adenosine threonylcarbamoyltransferase, putative	1
1	PVP01_0309900.1	conserved Plasmodium protein, unknown function	1
1	PVP01_0310500.1	conserved Plasmodium protein, unknown function	1
1	PVP01_0311200.1	conserved Plasmodium protein, unknown function	2
1	PVP01_0311400.1	conserved Plasmodium protein, unknown function	2
1	PVP01_0311600.1	conserved Plasmodium protein, unknown function	1
1	PVP01_0313600.1	conserved Plasmodium protein, unknown function	1
1	PVP01_0314900.1	serine/threonine-protein kinase NEK4	1
1	PVP01_0316500.1	Ham1-like protein, putative	1
1	PVP01_0316600.1	conserved Plasmodium protein, unknown function	1
1	PVP01_0319800.1	conserved Plasmodium protein, unknown function	1
1	PVP01_0320400.1	conserved Plasmodium protein, unknown function	1
1	PVP01_0400100.1	PIR protein	1
1	PVP01_0401000.1	Plasmodium exported protein, unknown function	1
1	PVP01_0401400.1	Plasmodium exported protein, unknown function	1
1	PVP01_0403500.1	PIR protein	1
1	PVP01_0405100.1	Plasmodium exported protein, unknown function	1
1	PVP01_0408500.1	conserved Plasmodium protein, unknown function	1
1	PVP01_0410800.1	protein transport protein SEC31, putative	2
1	PVP01_0411300.1	conserved Plasmodium protein, unknown function	1
1	PVP01_0416400.1	conserved Plasmodium protein, unknown function	1
1	PVP01_0416500.1	conserved Plasmodium protein, unknown function	1
1	PVP01_0419100.1	DNA repair protein RAD2, putative	1
1	PVP01_0420600.1	aspartate aminotransferase, putative	1
1	PVP01_0421000.1	conserved Plasmodium protein, unknown function	1
1	PVP01_0421100.1	condensin-2 complex subunit H2, putative	1
1	PVP01_0422000.1	protein kinase, putative	1
1	PVP01_0422100.1	repetitive organellar protein, putative	1
1	PVP01_0423400.1	Plasmodium exported protein, unknown function	1
1	PVP01_0500300.1	PIR protein	1
1	PVP01_0501600.1	Plasmodium exported protein, unknown function	1
1	PVP01_0508000.1	SPRY domain, putative	1
1	PVP01_0508400.1	conserved Plasmodium protein, unknown function	2
1	PVP01_0508500.1	conserved Plasmodium protein, unknown function	1
1	PVP01_0509300.1	conserved Plasmodium protein, unknown function	1
1	PVP01_0510100.1	conserved Plasmodium protein, unknown function	1
1	PVP01_0510300.1	conserved Plasmodium protein, unknown function	1
1	PVP01_0511200.1	RWD domain-containing protein, putative	1
1	PVP01_0511700.1	protein transport protein SEC23, putative	6
1	PVP01_0512100.1	conserved Plasmodium protein, unknown function	1
1	PVP01_0512500.1	protein transport protein SEC61 subunit beta, putative	1
1	PVP01_0513000.1	ATP-dependent RNA helicase DHX36, putative	1
1	PVP01_0513700.1	conserved Plasmodium protein, unknown function	1
1	PVP01_0514000.1	conserved Plasmodium protein, unknown function	1
1	PVP01_0514300.1	Snf2-related CBP activator, putative	1
1	PVP01_0514600.1	conserved Plasmodium protein, unknown function	1
1	PVP01_0514700.1	conserved Plasmodium protein, unknown function	1
1	PVP01_0516200.1	Plasmodium exported protein (PHIST), unknown function	1
1	PVP01_0518900.1	EF-hand calcium-binding domain-containing protein	1
1	PVP01_0519000.1	conserved Plasmodium protein, unknown function	1
1	PVP01_0520400.1	ubiquitin carboxyl-terminal hydrolase 13, putative	1
1	PVP01_0521700.1	conserved Plasmodium protein, unknown function	1
1	PVP01_0521900.1	coatomer subunit zeta, putative	1
1	PVP01_0522200.1	conserved Plasmodium protein, unknown function	1
1	PVP01_0522300.1	RING zinc finger protein, putative	1
1	PVP01_0523100.1	Plasmodium exported protein (PHIST), unknown function	1
1	PVP01_0525500.1	glutamyl-tRNA(Gln) amidotransferase subunit A, putative	1
1	PVP01_0525700.1	DNA helicase MCM9, putative	1
1	PVP01_0527400.1	conserved Plasmodium protein, unknown function	1
1	PVP01_0527500.1	conserved Plasmodium protein, unknown function	1
1	PVP01_0528800.1	conserved Plasmodium protein, unknown function	3
1	PVP01_0529400.1	zinc finger protein, putative	1
1	PVP01_0529800.1	transcription factor with AP2 domain(s), putative	1
1	PVP01_0530600.1	transmembrane emp24 domain-containing protein, putative	1
1	PVP01_0532000.1	glideosome associated protein with multiple membrane spans 2, putative	1
1	PVP01_0533200.1	lysophospholipase, putative	1
1	PVP01_0600100.1	PIR protein	1
1	PVP01_0601400.1	Plasmodium exported protein (PHIST), unknown function	1
1	PVP01_0603100.1	26S proteasome regulatory subunit p55, putative	1
1	PVP01_0604200.1	eukaryotic translation initiation factor subunit eIF2A, putative	1
1	PVP01_0604300.1	conserved Plasmodium protein, unknown function	1
1	PVP01_0604700.1	conserved Plasmodium protein, unknown function	1
1	PVP01_0604800.1	conserved Plasmodium protein, unknown function	1
1	PVP01_0604900.1	conserved Plasmodium protein, unknown function	1
1	PVP01_0606300.1	conserved Plasmodium protein, unknown function	1
1	PVP01_0607300.1	conserved Plasmodium protein, unknown function	1
1	PVP01_0621300.1	conserved Plasmodium protein, unknown function	1
1	PVP01_0621800.1	conserved Plasmodium protein, unknown function	1
1	PVP01_0622000.1	DNA repair helicase RAD25, putative	1
1	PVP01_0622400.1	antigen UB05, putative	1
1	PVP01_0623800.1	duffy binding protein	2
1	PVP01_0624100.1	PIR protein	1
1	PVP01_0700100.1	hypothetical protein	1
1	PVP01_0701700.1	conserved Plasmodium protein, unknown function	1
1	PVP01_0701800.1	ATP-dependent RNA helicase DDX60, putative	2
1	PVP01_0701900.1	conserved Plasmodium protein, unknown function	1
1	PVP01_0702900.1	prefoldin subunit 4, putative	1
1	PVP01_0703700.1	dynein heavy chain, putative	1
1	PVP01_0704300.1	coatomer subunit beta, putative	1
1	PVP01_0704500.1	exoribonuclease II, putative	1
1	PVP01_0705000.1	arginase, putative	2
1	PVP01_0705700.1	GTPase-activating protein, putative	1
1	PVP01_0706100.1	translation initiation factor SUI1, putative	1
1	PVP01_0706500.1	P1 nuclease, putative	1
1	PVP01_0707800.1	apoptosis-related protein, putative	1
1	PVP01_0707900.1	exoribonuclease, putative	2
1	PVP01_0708000.1	subpellicular microtubule protein 1, putative	1
1	PVP01_0708700.1	conserved Plasmodium protein, unknown function	1
1	PVP01_0709000.1	DNA repair protein REV1, putative	1
1	PVP01_0709400.1	DNA primase large subunit, putative	1
1	PVP01_0709700.1	conserved Plasmodium protein, unknown function	1
1	PVP01_0709800.1	cysteine repeat modular protein 1, putative	1
1	PVP01_0710600.1	zinc finger protein, putative	1
1	PVP01_0711000.1	conserved Plasmodium protein, unknown function	1
1	PVP01_0714400.1	major facilitator superfamily domain-containing protein, putative	1
1	PVP01_0714600.1	conserved Plasmodium protein, unknown function	1
1	PVP01_0715100.1	RNA-binding protein musashi, putative	1
1	PVP01_0715800.1	conserved Plasmodium protein, unknown function	1
1	PVP01_0716300.1	heat shock protein 70, putative	8
1	PVP01_0718800.1	conserved Plasmodium protein, unknown function	1
1	PVP01_0719000.1	conserved Plasmodium protein, unknown function	1
1	PVP01_0721300.1	conserved Plasmodium protein, unknown function	1
1	PVP01_0721500.1	DNA-directed RNA polymerase II subunit RPB3	1
1	PVP01_0722700.1	conserved Plasmodium protein, unknown function	1
1	PVP01_0724500.1	protein kinase, putative	1
1	PVP01_0724600.1	protein kinase, putative	1
1	PVP01_0725900.1	conserved Plasmodium protein, unknown function	1
1	PVP01_0730500.1	proteasome subunit beta type-6, putative	2
1	PVP01_0732800.1	TFIIH basal transcription factor complex helicase XPD subunit, putative	1
1	PVP01_0733500.1	cAMP-dependent protein kinase catalytic subunit, putative	1
1	PVP01_0733900.1	vacuolar protein sorting-associated protein 33, putative	1
1	PVP01_0736400.1	PIR protein	1
1	PVP01_0736800.1	Plasmodium exported protein, unknown function	2
1	PVP01_0737100.1	PIR protein	1
1	PVP01_0800700.1	reticulocyte binding protein 2b	1
1	PVP01_0802200.1	RNA-binding protein, putative	2
1	PVP01_0805600.1	conserved Plasmodium protein, unknown function	1
1	PVP01_0806600.1	PPPDE peptidase, putative	1
1	PVP01_0807800.1	zinc finger protein, putative	1
1	PVP01_0808500.1	nucleolar protein 5, putative	1
1	PVP01_0809800.1	conserved Plasmodium protein, unknown function	1
1	PVP01_0809900.1	kinesin-4, putative	1
1	PVP01_0810300.1	DNA2/NAM7 helicase, putative	1
1	PVP01_0810500.1	conserved Plasmodium protein, unknown function	1
1	PVP01_0811600.1	conserved Plasmodium protein, unknown function	1
1	PVP01_0813000.1	autophagy-related protein 18, putative	1
1	PVP01_0815200.1	conserved Plasmodium protein, unknown function	1
1	PVP01_0815600.1	conserved Plasmodium protein, unknown function	2
1	PVP01_0816600.1	conserved Plasmodium protein, unknown function	1
1	PVP01_0817800.1	D123 (regulator of eIF2), putative	2
1	PVP01_0820000.1	CPW-WPC family protein	1
1	PVP01_0824500.1	zinc finger protein, putative	1
1	PVP01_0829800.1	parasite-infected erythrocyte surface protein, putative	1
1	PVP01_0830000.1	phd finger protein, putative	1
1	PVP01_0831200.1	dual specificity protein phosphatase, putative	1
1	PVP01_0831700.1	activator of Hsp90 ATPase, putative	1
1	PVP01_0832300.1	conserved Plasmodium protein, unknown function	1
1	PVP01_0835100.1	conserved Plasmodium protein, unknown function	1
1	PVP01_0837700.1	serine/threonine protein kinase, putative	1
1	PVP01_0838500.1	PIR protein	1
1	PVP01_0839600.1	PIR protein	2
1	PVP01_0841000.1	PIR protein	1
1	PVP01_0902900.1	hypothetical protein	1
1	PVP01_0905000.1	chromatin remodeling protein, putative	2
1	PVP01_0907400.1	DEAD/DEAH box helicase, putative	1
1	PVP01_0911300.1	vacuolar protein sorting-associated protein 35, putative	2
1	PVP01_0911500.1	actin-like protein, putative	1
1	PVP01_0912400.1	endonuclease/exonuclease/phosphatase family protein, putative	1
1	PVP01_0912900.1	conserved Plasmodium protein, unknown function	1
1	PVP01_0913800.1	conserved Plasmodium protein, unknown function	2
1	PVP01_0914100.1	UDP-galactose transporter, putative	1
1	PVP01_0914700.1	mitogen-activated protein kinase 2, putative	1
1	PVP01_0917300.1	dipeptidyl aminopeptidase 1, putative	2
1	PVP01_0917600.1	conserved Plasmodium protein, unknown function	1
1	PVP01_0917700.1	deubiquinating/deneddylating enzyme, putative	1
1	PVP01_0918000.1	conserved Plasmodium protein, unknown function	1
1	PVP01_0919100.1	nucleolar protein 56, putative	1
1	PVP01_0921200.1	conserved Plasmodium protein, unknown function	1
1	PVP01_0922500.1	3-phosphoinositide dependent protein kinase-1, putative	1
1	PVP01_0922800.1	cupin-like protein, putative	1
1	PVP01_0923200.1	conserved Plasmodium protein, unknown function	1
1	PVP01_0925500.1	hypothetical protein	1
1	PVP01_0927500.1	RNA-binding protein, putative	1
1	PVP01_0928000.1	tRNA (guanine-N(7)-)-methyltransferase, putative	1
1	PVP01_0928800.1	conserved Plasmodium protein, unknown function	1
1	PVP01_0929000.1	multiprotein-bridging factor 1, putative	1
1	PVP01_0929400.1	CCR4-NOT transcription complex subunit 2, putative	1
1	PVP01_0930000.1	conserved Plasmodium protein, unknown function	1
1	PVP01_0932200.1	conserved Plasmodium protein, unknown function	1
1	PVP01_0933200.1	conserved Plasmodium protein, unknown function	1
1	PVP01_0934700.1	conserved Plasmodium protein, unknown function	1
1	PVP01_0935100.1	conserved Plasmodium protein, unknown function	1
1	PVP01_0936500.1	condensin-2 complex subunit D3, putative	1
1	PVP01_0938500.1	30S ribosomal protein S14, putative	1
1	PVP01_0939600.1	beta-catenin-like protein 1, putative	1
1	PVP01_0940800.1	V-type proton ATPase subunit F, putative	1
1	PVP01_0941300.1	conserved Plasmodium protein, unknown function	1
1	PVP01_0941700.1	conserved Plasmodium protein, unknown function	1
1	PVP01_0942400.1	OTU domain-containing protein, putative	1
1	PVP01_0946400.1	bicoid-interacting protein BIN3, putative	2
1	PVP01_0947400.1	conserved Plasmodium protein, unknown function	1
1	PVP01_0947600.1	sporozoite asparagine-rich protein	1
1	PVP01_0947900.1	conserved Plasmodium protein, unknown function	1
1	PVP01_0948600.1	serine/threonine protein kinase, putative	1
1	PVP01_0948900.1	tryptophan-rich protein	1
1	PVP01_0949700.1	PIR protein	2
1	PVP01_0949800.1	Plasmodium exported protein, unknown function	1
1	PVP01_0950000.1	PIR protein	2
1	PVP01_1001200.1	PIR protein	1
1	PVP01_1002900.1	formin 1, putative	1
1	PVP01_1003300.1	XAP-5 DNA binding protein, putative	1
1	PVP01_1003900.1	conserved Plasmodium protein, unknown function	1
1	PVP01_1007300.1	conserved Plasmodium protein, unknown function	1
1	PVP01_1009500.1	ribosome-interacting GTPase 1, putative	2
1	PVP01_1010100.1	transporter, putative	1
1	PVP01_1011800.1	conserved Plasmodium protein, unknown function	1
1	PVP01_1013700.1	conserved Plasmodium protein, unknown function	1
1	PVP01_1014900.1	histone RNA hairpin-binding protein, putative	1
1	PVP01_1015400.1	ATP-dependent RNA helicase DDX23, putative	1
1	PVP01_1016200.1	apicortin, putative	1
1	PVP01_1019100.1	kinase, putative	1
1	PVP01_1020700.1	conserved Plasmodium protein, unknown function	1
1	PVP01_1025000.1	soluble NSF attachment protein (SNAP), putative	1
1	PVP01_1026300.1	nuclear protein localization protein 4, putative	2
1	PVP01_1026700.1	conserved Plasmodium protein, unknown function	1
1	PVP01_1027100.1	rhomboid protease ROM4, putative	1
1	PVP01_1028600.1	conserved Plasmodium protein, unknown function	1
1	PVP01_1029200.1	conserved Plasmodium protein, unknown function	1
1	PVP01_1030100.1	conserved Plasmodium protein, unknown function	2
1	PVP01_1030300.1	myosin B, putative	1
1	PVP01_1030600.1	serine/arginine-rich splicing factor 12, putative	1
1	PVP01_1031700.1	merozoite surface protein 3	1
1	PVP01_1034300.1	lysophospholipase, putative	1
1	PVP01_1035000.1	PIR protein	1
1	PVP01_1035200.1	PIR protein	1
1	PVP01_1035600.1	Plasmodium exported protein, unknown function	1
1	PVP01_1102300.1	U2 small nuclear ribonucleoprotein A', putative	1
1	PVP01_1102900.1	conserved Plasmodium protein, unknown function	1
1	PVP01_1105100.1	conserved Plasmodium protein, unknown function	1
1	PVP01_1107500.1	exosome complex component RRP45, putative	1
1	PVP01_1109200.1	conserved Plasmodium protein, unknown function	1
1	PVP01_1110800.1	conserved Plasmodium protein, unknown function	1
1	PVP01_1118500.1	tetratricopeptide repeat protein, putative	1
1	PVP01_1118900.1	conserved protein, unknown function	1
1	PVP01_1119200.1	DNA polymerase epsilon catalytic subunit A, putative	1
1	PVP01_1119700.1	cullin-like protein, putative	1
1	PVP01_1119800.1	SET domain protein, putative	1
1	PVP01_1120600.1	RAP protein, putative	2
1	PVP01_1121600.1	ribonuclease P protein subunit p29, putative	1
1	PVP01_1121800.1	transportin, putative	1
1	PVP01_1121900.1	conserved Plasmodium protein, unknown function	1
1	PVP01_1122100.1	mitochondrial import inner membrane translocase subunit TIM22, putative	1
1	PVP01_1124200.1	DNA polymerase 1, putative	1
1	PVP01_1126300.1	ferredoxin--NADP reductase, putative	1
1	PVP01_1126400.1	nuclear polyadenylated RNA-binding protein NAB2, putative	2
1	PVP01_1127600.1	signal recognition particle subunit SRP68, putative	1
1	PVP01_1128200.1	mRNA binding Pumilio-homology domain protein, putative	1
1	PVP01_1129700.1	conserved Plasmodium protein, unknown function	1
1	PVP01_1130200.1	conserved Plasmodium protein, unknown function	1
1	PVP01_1132900.1	kinetochore protein NDC80, putative	1
1	PVP01_1134600.1	60S ribosomal protein L19, putative	4
1	PVP01_1135400.1	syntaxin binding protein, putative	1
1	PVP01_1135700.1	50S ribosomal protein L18, putative	1
1	PVP01_1135800.1	rhoptry protein ROP14, putative	1
1	PVP01_1136400.1	6-cysteine protein	1
1	PVP01_1138800.1	RNA-binding protein 25	1
1	PVP01_1140900.1	conserved Plasmodium protein, unknown function	1
1	PVP01_1141800.1	RING zinc finger protein, putative	1
1	PVP01_1142300.1	conserved Plasmodium protein, unknown function	1
1	PVP01_1142800.1	RNA-binding protein, putative	1
1	PVP01_1143500.1	calcium-binding protein, putative	1
1	PVP01_1143700.1	conserved Plasmodium protein, unknown function	2
1	PVP01_1145300.1	conserved Plasmodium protein, unknown function	1
1	PVP01_1146500.1	elongation factor G, putative	1
1	PVP01_1147000.1	Plasmodium exported protein, unknown function	1
1	PVP01_1147300.1	conserved Plasmodium protein, unknown function	1
1	PVP01_1148100.1	PIR protein	1
1	PVP01_1149100.1	PIR protein	2
1	PVP01_1149200.1	PIR protein, fragment	1
1	PVP01_1149500.1	PIR protein	1
1	PVP01_1201300.1	PIR protein	1
1	PVP01_1204800.1	conserved Plasmodium protein, unknown function	1
1	PVP01_1208100.1	6-cysteine protein	1
1	PVP01_1209400.1	conserved Plasmodium protein, unknown function	1
1	PVP01_1209600.1	rhomboid protease ROM6, putative	1
1	PVP01_1211000.1	conserved Plasmodium protein, unknown function	1
1	PVP01_1211100.1	kelch protein K13, putative	1
1	PVP01_1211400.1	DNA repair protein RAD5, putative	1
1	PVP01_1211500.1	conserved Plasmodium protein, unknown function	1
1	PVP01_1214000.1	mitochondrial pyruvate carrier protein 1, putative	1
1	PVP01_1214700.1	exosome complex component RRP42, putative	1
1	PVP01_1215100.1	conserved Plasmodium protein, unknown function	1
1	PVP01_1217500.1	1-deoxy-D-xylulose 5-phosphate synthase, putative	1
1	PVP01_1217900.1	nuclear movement protein, putative	1
1	PVP01_1219800.1	MSP7-like protein	1
1	PVP01_1220200.1	MSP7-like protein	1
1	PVP01_1220300.1	MSP7-like protein	1
1	PVP01_1220500.1	chaperone binding protein, putative	1
1	PVP01_1221000.1	histone H3-like centromeric protein CSE4, putative	1
1	PVP01_1225500.1	DNA-directed RNA polymerase III subunit RPC1, putative	1
1	PVP01_1229100.1	conserved Plasmodium protein, unknown function	1
1	PVP01_1229900.1	SNARE protein, putative	1
1	PVP01_1230500.1	conserved Plasmodium protein, unknown function	1
1	PVP01_1230600.1	conserved Plasmodium protein, unknown function	1
1	PVP01_1230800.1	vacuolar protein sorting-associated protein 52, putative	1
1	PVP01_1231700.1	conserved Plasmodium protein, unknown function	1
1	PVP01_1234900.1	conserved Plasmodium protein, unknown function	1
1	PVP01_1238000.1	splicing factor U2AF large subunit, putative	1
1	PVP01_1238200.1	aminophospholipid transporter, putative	1
1	PVP01_1238800.1	conserved Plasmodium protein, unknown function	1
1	PVP01_1241500.1	tRNA 3'-trailer sequence RNase, putative	1
1	PVP01_1244400.1	conserved Plasmodium protein, unknown function	1
1	PVP01_1246000.1	snRNA-activating protein complex subunit 3, putative	2
1	PVP01_1247900.1	ATP-dependent RNA helicase DBP5, putative	2
1	PVP01_1249500.1	conserved Plasmodium protein, unknown function	1
1	PVP01_1251600.1	conserved Plasmodium protein, unknown function	1
1	PVP01_1251900.1	MFS-type transporter, putative	1
1	PVP01_1253000.1	RNA-binding protein, putative	1
1	PVP01_1257500.1	transcription factor with AP2 domain(s), putative	1
1	PVP01_1258500.1	conserved Plasmodium protein, unknown function	1
1	PVP01_1258700.1	conserved Plasmodium protein, unknown function	1
1	PVP01_1260500.1	conserved Plasmodium protein, unknown function	1
1	PVP01_1261800.1	ATP-dependent RNA helicase MAK5, putative	1
1	PVP01_1263800.1	conserved Plasmodium protein, unknown function	1
1	PVP01_1264800.1	GTP-binding protein, putative	1
1	PVP01_1266000.1	cytoplasmic tRNA 2-thiolation protein 2, putative	1
1	PVP01_1266900.1	conserved Plasmodium protein, unknown function	1
1	PVP01_1268200.1	conserved Plasmodium protein, unknown function	1
1	PVP01_1269100.1	conserved Plasmodium protein, unknown function	1
1	PVP01_1270300.1	cysteine repeat modular protein 4, putative	1
1	PVP01_1270500.1	bromodomain protein, putative	1
1	PVP01_1270900.1	hypothetical protein	1
1	PVP01_1271100.1	erythrocyte membrane protein 3, putative	1
1	PVP01_1272500.1	PIR protein	1
1	PVP01_1273500.1	Plasmodium exported protein, unknown function	1
1	PVP01_1301600.1	dynein heavy chain, putative	1
1	PVP01_1303100.1	ubiquitin-conjugating enzyme E2, putative	1
1	PVP01_1305800.1	eukaryotic translation initiation factor 5, putative	1
1	PVP01_1306500.1	conserved Plasmodium protein, unknown function	1
1	PVP01_1309200.1	conserved Plasmodium protein, unknown function	3
1	PVP01_1310500.1	DNA helicase MCM8, putative	1
1	PVP01_1312600.1	histidine triad protein, putative	1
1	PVP01_1319100.1	acid phosphatase, putative	2
1	PVP01_1319500.1	ADP-dependent DNA helicase RecQ, putative	1
1	PVP01_1319800.1	conserved Plasmodium protein, unknown function	1
1	PVP01_1322500.1	conserved Plasmodium protein, unknown function	2
1	PVP01_1325700.1	serine/threonine protein phosphatase 7, putative	1
1	PVP01_1326400.1	conserved Plasmodium protein, unknown function	1
1	PVP01_1327500.1	DNA-directed RNA polymerase III subunit RPC6, putative	1
1	PVP01_1328000.1	mannose-1-phosphate guanyltransferase, putative	1
1	PVP01_1328200.1	surface protein P113, putative	1
1	PVP01_1329700.1	thioredoxin-like protein, putative	1
1	PVP01_1331100.1	DNA replication licensing factor MCM2, putative	1
1	PVP01_1331300.1	conserved Plasmodium protein, unknown function	1
1	PVP01_1331700.1	NOT family protein, putative	1
1	PVP01_1333500.1	conserved Plasmodium protein, unknown function	1
1	PVP01_1337500.1	plastid replication-repair enzyme, putative	1
1	PVP01_1337900.1	conserved Plasmodium protein, unknown function	1
1	PVP01_1339700.1	DNA damage-inducible protein 1, putative	1
1	PVP01_1340300.1	conserved Plasmodium protein, unknown function	1
1	PVP01_1342200.1	WD repeat-containing protein 65, putative	1
1	PVP01_1342500.1	conserved Plasmodium protein, unknown function	1
1	PVP01_1342700.1	RNA-binding protein 8A, putative	1
1	PVP01_1344200.1	adenylyl cyclase alpha, putative	1
1	PVP01_1345700.1	condensin complex subunit 1, putative	1
1	PVP01_1346600.1	conserved Plasmodium protein, unknown function	1
1	PVP01_1347400.1	PIR protein	1
1	PVP01_1403400.1	conserved Plasmodium protein, unknown function	1
1	PVP01_1404300.1	LisH domain-containing protein, putative	1
1	PVP01_1404400.1	sodium/hydrogen exchanger, Na+, H+ antiporter, putative	1
1	PVP01_1405400.1	small heat shock protein, putative	1
1	PVP01_1405900.1	conserved Plasmodium protein, unknown function	1
1	PVP01_1407400.1	MORN repeat protein, putative	1
1	PVP01_1409300.1	40S ribosomal protein S27, putative	1
1	PVP01_1410000.1	conserved Plasmodium protein, unknown function	1
1	PVP01_1411800.1	conserved Plasmodium protein, unknown function	1
1	PVP01_1413700.1	conserved Plasmodium protein, unknown function	1
1	PVP01_1414000.1	conserved Plasmodium protein, unknown function	1
1	PVP01_1414400.1	conserved Plasmodium protein, unknown function	1
1	PVP01_1414900.1	conserved Plasmodium protein, unknown function	1
1	PVP01_1415100.1	telomerase reverse transcriptase, putative	2
1	PVP01_1416500.1	phosphatidylinositol synthase, putative	1
1	PVP01_1418000.1	DNA replication licensing factor MCM4, putative	1
1	PVP01_1418900.1	conserved Plasmodium protein, unknown function	1
1	PVP01_1420300.1	conserved Plasmodium protein, unknown function	1
1	PVP01_1426000.1	AAA family ATPase, putative	1
1	PVP01_1428000.1	trypsin-like serine protease, putative	1
1	PVP01_1428600.1	conserved Plasmodium protein, unknown function	2
1	PVP01_1429600.1	conserved Plasmodium protein, unknown function	1
1	PVP01_1430900.1	conserved Plasmodium protein, unknown function	1
1	PVP01_1432500.1	DNA-directed RNA polymerases I, II, and III subunit RPABC3, putative	1
1	PVP01_1436400.1	anaphase-promoting complex subunit 10, putative	1
1	PVP01_1436900.1	conserved Plasmodium protein, unknown function	1
1	PVP01_1437000.1	conserved Plasmodium protein, unknown function	1
1	PVP01_1437300.1	conserved Plasmodium protein, unknown function	1
1	PVP01_1437600.1	secreted ookinete protein, putative	1
1	PVP01_1438500.1	pre-mRNA-processing factor 17, putative	1
1	PVP01_1438600.1	conserved Plasmodium protein, unknown function	1
1	PVP01_1439200.1	heterochromatin protein 1, putative	1
1	PVP01_1439300.1	histone-lysine N-methyltransferase, H3 lysine-4 specific, putative	1
1	PVP01_1441700.1	conserved Plasmodium protein, unknown function	1
1	PVP01_1445700.1	cyclin, putative	1
1	PVP01_1445900.1	conserved Plasmodium protein, unknown function	1
1	PVP01_1446900.1	conserved Plasmodium protein, unknown function	2
1	PVP01_1447100.1	conserved Plasmodium protein, unknown function	1
1	PVP01_1449300.1	ras-related protein Rab-2, putative	1
1	PVP01_1450000.1	conserved Plasmodium protein, unknown function	1
1	PVP01_1450400.1	dihydrolipoyl dehydrogenase, mitochondrial, putative	1
1	PVP01_1451100.1	nucleotidyltransferase, putative	1
1	PVP01_1451400.1	conserved Plasmodium protein, unknown function	1
1	PVP01_1451700.1	asparagine and aspartate rich protein 1, putative	1
1	PVP01_1452000.1	sentrin-specific protease 1, putative	1
1	PVP01_1452100.1	conserved Plasmodium protein, unknown function	1
1	PVP01_1452200.1	bromodomain protein, putative	1
1	PVP01_1452300.1	conserved Plasmodium protein, unknown function	2
1	PVP01_1452900.1	splicing factor 3B subunit 3, putative	1
1	PVP01_1456000.1	conserved Plasmodium protein, unknown function	1
1	PVP01_1457200.1	50S ribosomal protein L23, putative	1
1	PVP01_1457900.1	conserved Plasmodium protein, unknown function	1
1	PVP01_1458300.1	conserved Plasmodium protein, unknown function	1
1	PVP01_1460600.1	vacuolar-sorting protein SNF7, putative	1
1	PVP01_1460700.1	translation initiation factor SUI1, putative	1
1	PVP01_1461600.1	conserved Plasmodium protein, unknown function	1
1	PVP01_1465800.1	conserved Plasmodium protein, unknown function	1
1	PVP01_1467400.1	vacuolar protein sorting-associated protein 26, putative	1
1	PVP01_1468100.1	conserved Plasmodium protein, unknown function	1
1	PVP01_1469300.1	conserved Plasmodium protein, unknown function	1
1	PVP01_1472200.1	PIR protein	1

## Sheet: Sboliviensis
XRep	Accession	Protein Description	Avg Xrep
5	403253974	ubiquitin-conjugating enzyme E2 L3-like	1.8
5	403254300	coatomer subunit beta isoform 1	1.2
5	403254367	L-lactate dehydrogenase A chain	3
5	403254832	large neutral amino acids transporter small subunit 3	1.8
5	403255088	elongation factor 1-gamma	2.8
5	403255365	high mobility group protein B1-like, partial	2.4
5	403255416	uncharacterized protein LOC101039636	1.2
5	403255709	protein SET-like	1.2
5	403255885	voltage-dependent anion-selective channel protein 1	2.8
5	403256221	glutaredoxin-1	3.2
5	403256341	40S ribosomal protein S23	1.2
5	403256628	isochorismatase domain-containing protein 1	1.2
5	403256636	lamin-B1	2
5	403256754	myotrophin	2
5	403256779	bisphosphoglycerate mutase	3.2
5	403257409	nuclear migration protein nudC	2
5	403258111	60S ribosomal protein L11-like	1
5	403258137	UMP-CMP kinase isoform 1	2.2
5	403258531	40S ribosomal protein SA-like	1.6
5	403259324	ornithine aminotransferase, mitochondrial	1.2
5	403259393	eukaryotic translation initiation factor 3 subunit A	3.2
5	403259399	thioredoxin-dependent peroxide reductase, mitochondrial	2.2
5	403259549	glutathione S-transferase omega-1 isoform 1	1.2
5	403259801	phosphoglycerate mutase 1	1.4
5	403259932	60S ribosomal protein L19-like isoform 1	2
5	403260458	V-type proton ATPase subunit B, kidney isoform	1.6
5	403260495	poly(rC)-binding protein 1	1.8
5	403260551	60S ribosomal protein L6-like	1.4
5	403260559	actin-related protein 2	2.6
5	403260589	malate dehydrogenase, cytoplasmic	2
5	403260616	40S ribosomal protein S2-like isoform 1	1.2
5	403260666	spectrin beta chain, brain 1-like	2.6
5	403261564	tapasin	1.8
5	403261702	serine/arginine-rich splicing factor 3	1.6
5	403261934	heat shock cognate protein HSP 90-beta-like, partial	2.8
5	403261968	diphosphoinositol polyphosphate phosphohydrolase 1	2
5	403262065	hemoglobin subunit epsilon	3.4
5	403262067	hemoglobin subunit beta	3.6
5	403262505	heat shock cognate 71 kDa protein	4.2
5	403262853	radixin	2
5	403263198	T-cell surface glycoprotein CD3 epsilon chain	1.2
5	403263938	proteasome subunit alpha type-6-like isoform 1	1.4
5	403264120	proteasome activator complex subunit 1	3.2
5	403264400	c-1-tetrahydrofolate synthase, cytoplasmic	1.2
5	403264413	spectrin beta chain, erythrocyte	3.8
5	403265000	ATP synthase subunit alpha, mitochondrial isoform 1	2.6
5	403266218	thioredoxin isoform 1	4
5	403266627	ATP-dependent RNA helicase A	2.6
5	403266670	peroxiredoxin-6	2.4
5	403266781	desmin	1.4
5	403266892	actin-related protein 2/3 complex subunit 2 isoform 1	3.2
5	403266946	bifunctional purine biosynthesis protein PURH isoform 1	2.2
5	403267213	60 kDa heat shock protein, mitochondrial isoform 1	2.6
5	403267274	tubulin alpha-4A chain	3.6
5	403268090	mitogen-activated protein kinase 4	1
5	403268100	3-ketoacyl-CoA thiolase, mitochondrial	1.4
5	403268248	ras-related protein Rab-7a	2.2
5	403268562	microtubule-associated protein 4	1
5	403268595	cytochrome b-c1 complex subunit 1, mitochondrial-like	2.2
5	403268696	14-3-3 protein theta-like	2.6
5	403268775	antigen peptide transporter 1	1.4
5	403268779	proteasome subunit beta type-8 isoform 1	1.4
5	403268805	histone H1x-like, partial	2.8
5	403269084	cullin-associated NEDD8-dissociated protein 1-like	1.8
5	403269140	L-lactate dehydrogenase B chain	3.2
5	403269439	methionine--tRNA ligase, cytoplasmic	1.6
5	403269554	calmodulin isoform 1	2.6
5	403270715	histone H1.3-like	3.2
5	403271017	serpin B9	1.6
5	403271047	histone H2A type 1-like	3.2
5	403271458	interferon-induced GTP-binding protein Mx1	1.2
5	403271545	carbonyl reductase [NADPH] 1	2
5	403271668	T-complex protein 1 subunit theta isoform 1	1.8
5	403272179	ubiquitin-conjugating enzyme E2 N-like	3
5	403272224	alpha-enolase isoform 1	4.2
5	403272236	peptidyl-prolyl cis-trans isomerase D	1.2
5	403272418	glycophorin-A	2.8
5	403272423	SWI/SNF-related matrix-associated actin-dependent regulator of chromatin subfamily A member 5	1.4
5	403272475	6-phosphogluconate dehydrogenase, decarboxylating	1.2
5	403272691	40S ribosomal protein S6	1.2
5	403274088	lamin-B2	1.6
5	403274126	ankyrin-3	2.6
5	403274646	protein disulfide-isomerase A3	2.8
5	403274773	clathrin heavy chain 1	2.2
5	403275279	14-3-3 protein epsilon	2.8
5	403275583	60S ribosomal protein L31-like	1
5	403275850	leukotriene A-4 hydrolase	2.2
5	403276785	heterogeneous nuclear ribonucleoprotein F isoform 1	2
5	403276810	alpha-hemoglobin-stabilizing protein	1.6
5	403277017	coronin-1A isoform 1	4
5	403277103	cytochrome b-c1 complex subunit 2, mitochondrial-like	2
5	403277252	elongation factor Tu, mitochondrial	2
5	403277265	glutamate dehydrogenase 1, mitochondrial, partial	3
5	403278020	26S protease regulatory subunit 10B	1.2
5	403278071	nucleolin-like	2
5	403278155	vimentin	3.8
5	403278437	proteasome subunit alpha type-2	1.4
5	403278922	transferrin receptor protein 1	2.8
5	403279429	importin subunit beta-1 isoform 2	3
5	403279661	nucleoside diphosphate kinase B	2
5	403279712	serine/arginine-rich splicing factor 1	1.8
5	403279786	profilin-1	3.4
5	403279806	proteasome subunit beta type-6 isoform 1	1.2
5	403279865	vitronectin	1.2
5	403280374	rho GDP-dissociation inhibitor 1 isoform 1	1.8
5	403280504	ubiquitin-conjugating enzyme E2 O	1.2
5	403281161	RNA-binding protein 12	2.2
5	403281226	adenosylhomocysteinase isoform 1	2.2
5	403281345	serum albumin	3.6
5	403281827	60S acidic ribosomal protein P0	3.6
5	403281834	phosphatidylethanolamine-binding protein 1	3.2
5	403282075	syntaxin-7	1.2
5	403282203	T-complex protein 1 subunit epsilon	2
5	403282935	trinucleotide repeat-containing gene 6B protein isoform 1	2
5	403282980	SUN domain-containing protein 2	1.8
5	403283024	histone H1.0-like	2
5	403283045	ras-related C3 botulinum toxin substrate 2	1.2
5	403283098	myosin-9	3.6
5	403283222	hsc70-interacting protein	1.2
5	403284158	serine--tRNA ligase, cytoplasmic	1.4
5	403284310	F-actin-capping protein subunit alpha-1	2.2
5	403284823	protein FAM49B isoform 1	1.2
5	403284970	ezrin	2.4
5	403285333	stress-70 protein, mitochondrial	3.6
5	403285553	annexin A6 isoform 1	1.6
5	403285754	malate dehydrogenase, mitochondrial	2.6
5	403285760	14-3-3 protein gamma	3.2
5	403286230	plastin-2 isoform 1	3
5	403286372	heat shock protein HSP 90-beta-like isoform 1	2
5	403286483	poly(rC)-binding protein 1-like isoform 1	2
5	403286685	rho GDP-dissociation inhibitor 2 isoform 1	3.8
5	403286956	WD repeat-containing protein 1	1.6
5	403287522	F-actin-capping protein subunit beta isoform 1	1.6
5	403287667	heterochromatin protein 1-binding protein 3	1.2
5	403287718	protein DDI1 homolog 2	1.2
5	403288056	protein FAM188B	1.2
5	403288246	trifunctional enzyme subunit alpha, mitochondrial	1
5	403288344	heterogeneous nuclear ribonucleoprotein U	1.8
5	403288386	fumarate hydratase, mitochondrial	1.2
5	403288628	V-type proton ATPase catalytic subunit A isoform 1	1.4
5	403288713	casein kinase II subunit alpha-like	1.2
5	403289010	annexin A1	3.6
5	403289391	purine nucleoside phosphorylase	2
5	403289917	60S ribosomal protein L15-like	1.2
5	403290028	heterogeneous nuclear ribonucleoprotein A/B	1.2
5	403290297	activated RNA polymerase II transcriptional coactivator p15	1.2
5	403290732	14-3-3 protein beta/alpha	3.6
5	403291047	transketolase	3
5	403291258	glutathione peroxidase 1	3.6
5	403291609	SH3 domain-binding glutamic acid-rich-like protein isoform 1	1.2
5	403291654	phosphoglycerate kinase 1	3.8
5	403291932	solute carrier family 2, facilitated glucose transporter member 1	1.2
5	403292029	adenylyl cyclase-associated protein 1	2.4
5	403292200	GTP-binding nuclear protein Ran	3.2
5	403292351	DBIRD complex subunit KIAA1967 homolog isoform 1	1.4
5	403292482	dematin	1.6
5	403292616	vacuolar protein sorting-associated protein 35	1.2
5	403292722	glucose-6-phosphate isomerase	2.6
5	403293111	proteasome subunit beta type-2 isoform 1	1.8
5	403293319	splicing factor, proline- and glutamine-rich-like	1.4
5	403293515	EGF-containing fibulin-like extracellular matrix protein 2	3.2
5	403293940	transgelin-2 isoform 1	2.6
5	403294115	stress-induced-phosphoprotein 1	1.6
5	403294125	peroxiredoxin-5, mitochondrial	1.4
5	403294184	T-complex protein 1 subunit gamma	2.4
5	403294193	spectrin alpha chain, erythrocyte	4
5	403295268	macrophage migration inhibitory factor	1.6
5	403295889	elongation factor 2	3.2
5	403296075	ELAV-like protein 1	1.2
5	403296087	heterogeneous nuclear ribonucleoprotein M	2.2
5	403296279	complement C3	2
5	403296395	rab GDP dissociation inhibitor beta isoform 1	2.2
5	403296423	aldo-keto reductase family 1 member C1 homolog	1.2
5	403296725	keratin, type II cytoskeletal 1	2.4
5	403296804	poly(rC)-binding protein 2	1.4
5	403296959	proliferation-associated protein 2G4	2.4
5	403297087	extended synaptotagmin-1	1.2
5	403297103	ATP synthase subunit beta, mitochondrial	3.6
5	403297233	low molecular weight phosphotyrosine protein phosphatase isoform 1	1.2
5	403297375	ubiquitin-like modifier-activating enzyme 1 isoform 1	1.2
5	403298226	tropomyosin alpha-4 chain isoform 1	1.2
5	403298315	alanine--tRNA ligase, cytoplasmic	1.2
5	403298335	protein VAC14 homolog	1.2
5	403298789	heterogeneous nuclear ribonucleoprotein H2 isoform 1	2
5	403299204	ferritin light chain	2.2
5	403299206	apoptosis regulator BAX	1.2
5	403299544	carbonic anhydrase 2	3.6
5	403299826	78 kDa glucose-regulated protein	3.6
5	403299948	14-3-3 protein zeta/delta-like isoform 1	3.8
5	403300207	ATP-binding cassette sub-family B member 10, mitochondrial	1.2
5	403300479	high mobility group protein B1-like	2
5	403300735	proteasome inhibitor PI31 subunit isoform 1	3.2
5	403300789	nucleolar protein 56	2
5	403300845	UPF0687 protein C20orf27 homolog isoform 1	1.2
5	403301105	glutathione S-transferase P	3.2
5	403301300	cytochrome c oxidase subunit 5B, mitochondrial-like	2
5	403301997	tryptophan--tRNA ligase, cytoplasmic isoform 1	1
5	403302244	UV excision repair protein RAD23 homolog A isoform 1	1.4
5	403302934	cytochrome c1, heme protein, mitochondrial-like	1.2
5	403303596	regulator of nonsense transcripts 1	1.2
5	403304272	catechol O-methyltransferase	3
5	403304663	ATP-citrate synthase	1.4
5	403305068	polyadenylate-binding protein 1	1.4
5	403305292	26S protease regulatory subunit 6B isoform 1	1.8
5	403305628	60S acidic ribosomal protein P2	2.4
5	403305721	transaldolase	2
5	403306195	protein-L-isoaspartate(D-aspartate) O-methyltransferase	2
5	403306300	band 3 anion transport protein	4
5	403306707	transitional endoplasmic reticulum ATPase	4
5	403306887	methyl-CpG-binding protein 2	2.4
5	403306997	calnexin isoform 1	2.6
5	403308155	uncharacterized protein LOC101029560	2
5	403308488	tubulin beta chain	2.2
5	403308670	histone H1.5-like	2.8
5	403308988	triosephosphate isomerase	3.8
5	403309242	patr class I histocompatibility antigen, A-2 alpha chain-like	1.2
5	403309549	hemoglobin subunit gamma-like, partial	3.6
4	403254127	cytochrome c-like	1
4	403254286	glyceraldehyde-3-phosphate dehydrogenase-like	3.5
4	403254455	peptidyl-prolyl cis-trans isomerase A-like isoform 1	2
4	403254548	catalase	4.25
4	403254569	CD44 antigen	1
4	403254695	prothrombin isoform 1	1
4	403255345	heterogeneous nuclear ribonucleoprotein A1-like	1.75
4	403255631	ferritin heavy chain	1.75
4	403255639	neuroblast differentiation-associated protein AHNAK	2
4	403255891	heat shock 70 kDa protein 4	1.25
4	403256025	RNA-binding motif protein, X chromosome-like	1
4	403256303	glyceraldehyde-3-phosphate dehydrogenase-like isoform 1	2.25
4	403256659	uncharacterized protein LOC101052608	1
4	403256689	endoplasmic reticulum aminopeptidase 1	1.25
4	403256877	ADP-ribosylation factor 5	2
4	403257138	guanine nucleotide-binding protein G(i) subunit alpha-1	1.25
4	403257384	elongation factor 1-alpha 1-like isoform 1	2.75
4	403257493	filamin-C	1.25
4	403258685	heterogeneous nuclear ribonucleoprotein A3	2
4	403259194	nebulin	1.25
4	403259209	uncharacterized protein LOC101028338	3.25
4	403259540	xaa-Pro aminopeptidase 1	1.25
4	403259929	tropomyosin alpha-3 chain-like	1.25
4	403259987	actin, aortic smooth muscle isoform 1	3.25
4	403260468	beta-adducin isoform 1	3.25
4	403260564	ras-related protein Rab-1A	1.25
4	403260664	ubiquitin-40S ribosomal protein S27a	3.5
4	403260765	polyubiquitin-B-like	2
4	403260836	coactosin-like protein, partial	1.75
4	403261487	phosphoglycerate kinase 2	2
4	403261570	40S ribosomal protein S18	2.75
4	403261818	O-acetyl-ADP-ribose deacetylase C6orf130 homolog isoform 1	1.25
4	403262069	hemoglobin subunit delta	4.25
4	403262289	40S ribosomal protein S3 isoform 1	2.25
4	403262584	porphobilinogen deaminase isoform 1	1.5
4	403262701	apolipoprotein A-I isoform 1	1.25
4	403262996	elongation factor 1-alpha 1-like isoform 1	2
4	403263183	40S ribosomal protein S25	2.25
4	403263301	60S ribosomal protein L7a	1
4	403264672	dihydrolipoyllysine-residue succinyltransferase component of 2-oxoglutarate dehydrogenase complex, mitochondrial	1.25
4	403265201	small nuclear ribonucleoprotein Sm D1 isoform 1	1.25
4	403265212	ubiquitin carboxyl-terminal hydrolase 14 isoform 1	1
4	403265302	T-complex protein 1 subunit beta-like	2
4	403265362	tubulin beta-6 chain	2
4	403265503	potassium voltage-gated channel subfamily H member 8	1.25
4	403265830	serotransferrin isoform 1	2.25
4	403266017	ceruloplasmin-like	1.25
4	403266081	ras-related protein Rab-14	1
4	403266091	26S proteasome non-ATPase regulatory subunit 5 isoform 1	1.5
4	403266151	delta-aminolevulinic acid dehydratase	3.25
4	403266933	X-ray repair cross-complementing protein 5	1.5
4	403267372	transportin-1 isoform 1	1
4	403267534	beta-actin-like protein 2-like	3.25
4	403267639	NAD(P) transhydrogenase, mitochondrial isoform 1	1.5
4	403267688	complement component C7	1.25
4	403268234	ruvB-like 1 isoform 1	1.75
4	403268767	glutathione S-transferase A4-like	3.25
4	403270695	14-3-3 protein beta/alpha-B-like	2.25
4	403270730	histone H1.4-like	2
4	403270744	histone H1.2-like	3.25
4	403270752	histone H2B type 1-B-like	2
4	403271001	tubulin beta-2A chain-like	1
4	403271326	HLA class I histocompatibility antigen, A-26 alpha chain-like	1.25
4	403271576	ATP synthase subunit O, mitochondrial	1.25
4	403271624	superoxide dismutase [Cu-Zn]	2.25
4	403272146	nucleosome assembly protein 1-like 1	1.25
4	403272869	importin-5	1.25
4	403272916	tripeptidyl-peptidase 2	1.25
4	403273028	60S ribosomal protein L4-like	1
4	403273162	hemoglobin subunit mu	2.25
4	403273674	heat shock protein 75 kDa, mitochondrial	3.5
4	403274563	annexin A2 isoform 1	2.5
4	403274674	AP-1 complex subunit beta-1 isoform 1	1
4	403274874	very long-chain specific acyl-CoA dehydrogenase, mitochondrial isoform 1	1.5
4	403275034	phosphoribosylformylglycinamidine synthase	1.25
4	403275058	myosin-10 isoform 1	2
4	403275526	ankyrin-2	2.75
4	403275929	endoplasmin	3
4	403278069	eukaryotic translation initiation factor 2 subunit 2-like	1
4	403278448	biliverdin reductase A	1
4	403278600	histone H2A.V-like	3.5
4	403279403	LIM and SH3 domain protein 1	1.25
4	403279422	puromycin-sensitive aminopeptidase isoform 1	1.25
4	403279715	dynein light chain 2, cytoplasmic	1
4	403279965	bleomycin hydrolase	1.25
4	403279997	uncharacterized protein LOC101040688	1.75
4	403280067	complement component 1 Q subcomponent-binding protein, mitochondrial	1.25
4	403280419	eukaryotic initiation factor 4A-III	2
4	403280585	ATP synthase subunit d, mitochondrial isoform 1	1.25
4	403281186	eukaryotic translation initiation factor 6 isoform 1	1.25
4	403281645	aldehyde dehydrogenase, mitochondrial isoform 1	2
4	403282009	60S acidic ribosomal protein P0-like	1.5
4	403282096	40S ribosomal protein S12	1.5
4	403282533	proteasome subunit alpha type-7	1
4	403282543	40S ribosomal protein S21	1.25
4	403283210	X-ray repair cross-complementing protein 6	2.25
4	403283212	aconitate hydratase, mitochondrial	1.25
4	403283316	26S proteasome non-ATPase regulatory subunit 11	1.75
4	403284006	glutamate--cysteine ligase regulatory subunit	1.5
4	403284168	proteasome subunit alpha type-5	3.75
4	403286248	translationally-controlled tumor protein isoform 1	1.25
4	403287000	LETM1 and EF-hand domain-containing protein 1, mitochondrial	1
4	403287204	actin, cytoplasmic 1	3.75
4	403287684	aflatoxin B1 aldehyde reductase member 4-like, partial	1.25
4	403287831	dipeptidyl peptidase 1	1.25
4	403287969	heterogeneous nuclear ribonucleoproteins A2/B1 isoform 1	3.25
4	403287971	heterogeneous nuclear ribonucleoproteins A2/B1 isoform 2	1.75
4	403288124	ATP-dependent RNA helicase DDX1	1.25
4	403288679	transgelin-3 isoform 1	1.75
4	403290336	annexin A5	1.25
4	403291397	phosphatidylinositol 3,4,5-trisphosphate 5-phosphatase 1 isoform 1	1
4	403292111	40S ribosomal protein S8	2
4	403292317	exportin-7	3
4	403292410	dihydropyrimidinase-related protein 2 isoform 1	1.25
4	403292441	clusterin	1.25
4	403292510	N-acetyltransferase ESCO2	2.5
4	403292850	tubulin-folding cofactor B	1
4	403293293	protein 4.1 isoform 1	2.5
4	403293591	dipeptidyl peptidase 3 isoform 1	1
4	403293675	pyruvate kinase isozymes R/L isoform 1	1.5
4	403294104	SAP domain-containing ribonucleoprotein-like isoform 1	1.25
4	403294199	uncharacterized protein LOC101044662	2.25
4	403294667	heterogeneous nuclear ribonucleoprotein M-like	1.75
4	403295087	oxysterol-binding protein 2 isoform 1	1
4	403295628	protein SET-like, partial	1.75
4	403295709	high mobility group protein B2	1.5
4	403296275	tubulin beta-4A chain	2
4	403296341	hsp90 co-chaperone Cdc37	1.25
4	403296709	keratin, type II cytoskeletal 5	3.25
4	403296711	keratin, type II cytoskeletal 71	1.25
4	403296723	uncharacterized protein LOC101046470	3.75
4	403296760	40S ribosomal protein S16-like isoform 1	2
4	403296953	partner of Y14 and mago	1.25
4	403296955	40S ribosomal protein S26	1.25
4	403297235	low molecular weight phosphotyrosine protein phosphatase isoform 2	1
4	403297989	voltage-dependent anion-selective channel protein 2 isoform 1	1
4	403298630	tropomodulin-1	1.25
4	403299538	carbonic anhydrase 1 isoform 1	4.25
4	403299758	adenylate kinase isoenzyme 1 isoform 1	1.25
4	403300546	moesin	2.75
4	403302074	hematopoietic lineage cell-specific protein	1.75
4	403302191	ATP-dependent RNA helicase DDX39A isoform 1	1.5
4	403302262	peroxiredoxin-2	4.25
4	403302565	interleukin enhancer-binding factor 2	1.25
4	403302644	40S ribosomal protein S4, X isoform-like isoform 1	1.75
4	403302671	40S ribosomal protein S16-like isoform 1	1.5
4	403302781	histone H2A type 2-B-like	1.75
4	403303083	succinyl-CoA ligase [ADP/GDP-forming] subunit alpha, mitochondrial	1.25
4	403303160	glyceraldehyde-3-phosphate dehydrogenase	3.5
4	403303658	ankyrin-1	4.25
4	403304602	26S proteasome non-ATPase regulatory subunit 3	1.75
4	403304689	keratin, type I cytoskeletal 10	3.75
4	403304913	proteasome subunit alpha type-4	1
4	403305233	heterogeneous nuclear ribonucleoprotein L	2.75
4	403305326	flavin reductase (NADPH)	4.25
4	403305602	nucleosome assembly protein 1-like 4 isoform 1	1.25
4	403306660	talin-1	2.75
4	403306920	glucose-6-phosphate 1-dehydrogenase isoform 1	2
4	403306978	55 kDa erythrocyte membrane protein	2.75
4	403307567	serine/threonine-protein phosphatase 2A 65 kDa regulatory subunit A alpha isoform isoform 1	1.5
4	403307812	heat shock 70 kDa protein 1-like	3.75
4	403308360	ATPase inhibitor, mitochondrial	1.25
4	403308453	myosin-11	2.25
4	403308699	uncharacterized protein LOC101044508	4.25
4	403309092	basigin	1.25
4	403309186	glyceraldehyde-3-phosphate dehydrogenase-like	1.75
3	403254331	phosphatidylinositol 4-phosphate 3-kinase C2 domain-containing subunit alpha	1.33333
3	403254333	40S ribosomal protein S13-like	1.33333
3	403254567	probable methylthioribulose-1-phosphate dehydratase	1
3	403255664	ADP/ATP translocase 3	1.66667
3	403255846	core histone macro-H2A.1-like	4.66667
3	403256206	calpastatin isoform 1	2
3	403256208	calpastatin isoform 2	1
3	403257012	transcription elongation factor B polypeptide 1-like	1
3	403257089	60S ribosomal protein L26-like	1
3	403257095	26S protease regulatory subunit 7	2.66667
3	403257405	14-3-3 protein sigma	2.33333
3	403257521	F-actin-capping protein subunit alpha-2	2
3	403257696	far upstream element-binding protein 1 isoform 1	1.33333
3	403258199	isocitrate dehydrogenase [NADP], mitochondrial isoform 1	2
3	403258201	isocitrate dehydrogenase [NADP], mitochondrial isoform 2	2.33333
3	403258304	40S ribosomal protein S17-like isoform 1	1
3	403259129	titin	2
3	403259291	peptidyl-prolyl cis-trans isomerase A-like	2.33333
3	403260609	T-complex protein 1 subunit delta isoform 1	1.33333
3	403261117	midasin	1
3	403261164	60S ribosomal protein L5-like isoform 1	1
3	403261187	heterogeneous nuclear ribonucleoprotein Q	1.33333
3	403261665	peptidyl-prolyl cis-trans isomerase FKBP5	1.33333
3	403261763	small nuclear ribonucleoprotein E-like	1.33333
3	403261837	60S ribosomal protein L23a-like	1
3	403262049	ubiquilin-3	1
3	403262596	histone H2A type 2-B-like	3
3	403262963	40S ribosomal protein S3a-like isoform 1	1
3	403263126	histone-binding protein RBBP4-like	1
3	403263261	peptidyl-prolyl cis-trans isomerase A-like isoform 1	1.66667
3	403263350	heterogeneous nuclear ribonucleoprotein D0 isoform 1	2.66667
3	403263487	alpha-synuclein isoform 1	3.66667
3	403264028	small ubiquitin-related modifier 2-like isoform 1	1
3	403264257	heterogeneous nuclear ribonucleoprotein C-like 1-like isoform 3	1.33333
3	403264912	histone H3.3C-like	2
3	403264950	RNA-binding protein 25	1
3	403265156	proteasome subunit alpha type-7-like isoform 1	1.33333
3	403265251	myosin regulatory light polypeptide 9-like isoform 1	1.66667
3	403265255	myosin regulatory light polypeptide 9-like isoform 3	2
3	403266070	erythrocyte band 7 integral membrane protein isoform 1	1
3	403267347	serine/threonine-protein phosphatase 6 regulatory ankyrin repeat subunit B	1.33333
3	403267653	chromobox protein homolog 3-like	1
3	403267940	coiled-coil domain-containing protein 102B	1.33333
3	403268105	60S ribosomal protein L17	1
3	403268633	elongation factor 1-alpha 1	1
3	403269452	actin, cytoplasmic 2-like, partial	3.66667
3	403269617	glyceraldehyde-3-phosphate dehydrogenase-like isoform 1	2
3	403270121	eukaryotic initiation factor 4A-II	2
3	403270340	actin-related protein 2/3 complex subunit 4 isoform 1	2.66667
3	403270721	histone H2B type 1-like	3.66667
3	403271399	6-phosphofructokinase, liver type isoform 1	1.66667
3	403272317	40S ribosomal protein S19-like	1
3	403272559	microsomal glutathione S-transferase 3 isoform 1	1
3	403272775	40S ribosomal protein S8-like isoform 1	1.66667
3	403273327	60S ribosomal protein L3-like	1.33333
3	403273682	coronin-7	1
3	403273808	core histone macro-H2A.2-like	1.66667
3	403274020	ribosomal L1 domain-containing protein 1	1.33333
3	403274199	alpha-1-antichymotrypsin	1.33333
3	403274395	sorbitol dehydrogenase	1
3	403274462	erythrocyte membrane protein band 4.2 isoform 1	4.33333
3	403274848	40S ribosomal protein S7-like	1.33333
3	403275092	myosin-4	1
3	403275246	dual specificity mitogen-activated protein kinase kinase 3	1
3	403275793	histone H2A.Z-like	3
3	403276020	pyruvate kinase isozymes M1/M2 isoform 1	2.33333
3	403276022	pyruvate kinase isozymes M1/M2 isoform 2	1.66667
3	403276024	pyruvate kinase isozymes M1/M2 isoform 3	2
3	403276512	actin, cytoplasmic 1-like	4
3	403276755	zinc finger protein 22	1
3	403277003	fructose-bisphosphate aldolase A isoform 4	1.33333
3	403277182	voltage-dependent calcium channel gamma-3 subunit	1.66667
3	403277273	2-oxoglutarate dehydrogenase-like, mitochondrial	1
3	403277478	bifunctional glutamate/proline--tRNA ligase isoform 1	1.33333
3	403277660	C4b-binding protein alpha chain-like	1
3	403277744	rab3 GTPase-activating protein non-catalytic subunit	1.33333
3	403277797	proteasome subunit alpha type-3 isoform 1	1.66667
3	403278262	26S proteasome non-ATPase regulatory subunit 1	1
3	403279033	ubiquitin carboxyl-terminal hydrolase isozyme L3	1
3	403279881	fructose-bisphosphate aldolase C	2
3	403280304	glycophorin-C	1.33333
3	403280704	beta-2-glycoprotein 1	1.33333
3	403280745	ras-related C3 botulinum toxin substrate 3	1.33333
3	403280769	actin, cytoplasmic 2	3.33333
3	403280810	phosphoribosyl pyrophosphate synthase-associated protein 1	2
3	403282920	ran GTPase-activating protein 1 isoform 1	2
3	403282966	60S ribosomal protein L3	2
3	403283022	eukaryotic translation initiation factor 3 subunit L	2
3	403283188	myotubularin-related protein 5	1
3	403284030	cysteine-rich protein 1	1
3	403284327	60S ribosomal protein L15-like	1.33333
3	403284419	T-cell surface antigen CD2	1
3	403285306	matrin-3 isoform 1	1.66667
3	403288052	glycine--tRNA ligase	1.33333
3	403288322	ADP-ribosylation factor 1	1.66667
3	403289148	polyubiquitin-B-like	2.66667
3	403289251	cofilin-1-like isoform 1	2.33333
3	403290086	beta-synuclein isoform 1	1
3	403290170	nucleophosmin isoform 1	1.33333
3	403290195	lymphocyte cytosolic protein 2 isoform 1	1
3	403291491	septin-2 isoform 1	1
3	403293295	protein 4.1 isoform 2	3
3	403293368	fermitin family homolog 3	1.33333
3	403293472	calpain-1 catalytic subunit	1.66667
3	403293545	barrier-to-autointegration factor isoform 1	1.33333
3	403294641	isoleucine--tRNA ligase, cytoplasmic	2
3	403296559	peripherin	1.33333
3	403296561	tubulin alpha-1D chain-like	1.66667
3	403296729	keratin, type II cytoskeletal 1b	3.33333
3	403296937	diacylglycerol kinase alpha isoform 4	1.33333
3	403296965	myosin light polypeptide 6 isoform 1	2.33333
3	403297045	keratin, type II cytoskeletal 79	3
3	403297615	protein DJ-1 isoform 1	1.33333
3	403297938	annexin A11	1.33333
3	403298112	peptidyl-prolyl cis-trans isomerase A-like isoform 1	2
3	403298859	inositol monophosphatase 1-like isoform 1	1
3	403298954	26S proteasome non-ATPase regulatory subunit 6	1
3	403299908	serine/threonine-protein phosphatase 6 catalytic subunit	1
3	403300203	actin, alpha skeletal muscle	3.33333
3	403300830	40S ribosomal protein SA-like isoform 1	1.33333
3	403300938	heterogeneous nuclear ribonucleoprotein K isoform 1	1.66667
3	403301139	carabin	1.33333
3	403301255	U5 small nuclear ribonucleoprotein 200 kDa helicase	1.33333
3	403301550	tubulin beta-4B chain	1.33333
3	403301570	endothelial differentiation-related factor 1	1.33333
3	403302043	cytoplasmic dynein 1 heavy chain 1	1.66667
3	403302051	tropomodulin-3	1
3	403302595	protein S100-A6	1
3	403302779	histone H2A type 2-A-like	2.33333
3	403303640	voltage-dependent anion-selective channel protein 3 isoform 1	2
3	403304219	clathrin heavy chain 2	1.33333
3	403305253	glia maturation factor gamma	1
3	403305733	ribonuclease inhibitor	1.33333
3	403306219	vesicle-fusing ATPase isoform 1	1
3	403306894	filamin-A isoform 1	2.66667
3	403306968	N-acylglucosamine 2-epimerase	1
3	403307005	heterogeneous nuclear ribonucleoprotein H isoform 1	2
3	403307827	chloride intracellular channel protein 1 isoform 1	1
3	403308029	40S ribosomal protein S5	1
3	403308061	transcription intermediary factor 1-beta	2
3	403308177	ATP synthase subunit delta, mitochondrial	1.33333
3	403308310	60S ribosomal protein L13 isoform 1	1.66667
3	403308341	tubulin beta-3 chain	3
3	403309049	14-3-3 protein eta isoform 1	1
2	403253959	60S ribosomal protein L13a-like	1
2	403254047	centromere protein J	1
2	403254227	AMP deaminase 3 isoform 3	1
2	403254737	26S protease regulatory subunit 6A	1.5
2	403254842	ubiquitin/ISG15-conjugating enzyme E2 L6	1
2	403254897	peptidyl-prolyl cis-trans isomerase A-like	1.5
2	403255447	proteasome subunit alpha type-1	1.5
2	403255457	L-lactate dehydrogenase A-like 6A	4.5
2	403255848	core histone macro-H2A.1-like	2
2	403255983	40S ribosomal protein SA-like	1.5
2	403256212	calpastatin isoform 3	2
2	403256696	60S ribosomal protein L7-like	1.5
2	403257793	ubiquitin-40S ribosomal protein S27a-like	4.5
2	403257891	phosphoglucomutase-1 isoform 1	1
2	403258163	ras GTPase-activating-like protein IQGAP1	1
2	403258529	cytosolic carboxypeptidase 4	1
2	403258589	zinc finger protein 804A	1
2	403258930	lymphocyte antigen 75 isoform 1	1
2	403259344	uncharacterized protein C10orf88 homolog	1
2	403259584	up-regulated during skeletal muscle growth protein 5	1
2	403259807	ferritin heavy chain-like	1.5
2	403259917	insulin-degrading enzyme	1
2	403260069	tetratricopeptide repeat protein 40	1
2	403260112	mini-chromosome maintenance complex-binding protein	1.5
2	403260172	golgi-specific brefeldin A-resistance guanine nucleotide exchange factor 1	1
2	403260369	actin, gamma-enteric smooth muscle	1.5
2	403260397	60S ribosomal protein L23-like	1.5
2	403260524	rho GTPase-activating protein 25 isoform 1	1.5
2	403260587	UTP--glucose-1-phosphate uridylyltransferase	1.5
2	403261014	heat shock protein HSP 90-beta-like	1.5
2	403261583	protein CutA isoform 1	1
2	403261910	mitochondrial import receptor subunit TOM6 homolog	1
2	403262875	acetyl-CoA acetyltransferase, mitochondrial	1.5
2	403263208	serine/threonine-protein kinase SIK3	1
2	403263279	peptidyl-prolyl cis-trans isomerase A-like isoform 9	3.5
2	403263495	alpha-synuclein isoform 5	2
2	403263513	cell division control protein 42 homolog	1.5
2	403263661	eukaryotic translation initiation factor 2 subunit 3	3
2	403263769	histone-binding protein RBBP7	1
2	403263771	coiled-coil domain-containing protein 158	1
2	403263784	profilin-1-like	1
2	403263845	uncharacterized protein LOC101053493	1
2	403263940	proteasome subunit alpha type-6-like isoform 1	1.5
2	403263954	cofilin-1-like isoform 4	1
2	403264251	FACT complex subunit SPT16	1
2	403264253	heterogeneous nuclear ribonucleoprotein C-like 1-like isoform 1	3.5
2	403264409	heat shock-related 70 kDa protein 2	5.5
2	403264421	ras-related protein Rab-8A isoform 1	1
2	403264606	ferritin light chain-like isoform 1	1
2	403264904	uncharacterized protein LOC101041609	1
2	403265160	proteasome subunit alpha type-7-like isoform 3	1
2	403265337	vesicle-associated membrane protein-associated protein A	1.5
2	403265499	ras-related protein Rab-5A	1
2	403265832	serotransferrin isoform 1	4.5
2	403266335	actin-related protein 2/3 complex subunit 5	1.5
2	403266710	arf-GAP domain and FG repeat-containing protein 1	1
2	403267286	tubulin beta-2B chain-like	1
2	403267416	28S ribosomal protein S36, mitochondrial	1
2	403267713	complement component C9	1
2	403267906	cytosolic non-specific dipeptidase isoform 1	1.5
2	403268371	serine/threonine-protein kinase PAK 2	1
2	403268536	histone-lysine N-methyltransferase SETD2	1
2	403269492	polyubiquitin-B-like	3.5
2	403269660	THUMP domain-containing protein 2	1
2	403269672	serine/arginine-rich splicing factor 7 isoform 1	1
2	403270371	peptidyl-prolyl cis-trans isomerase A-like	1
2	403270373	SET domain-containing protein 5	1
2	403270674	putative tubulin beta chain-like protein ENSP00000290377-like	2.5
2	403270717	histone H2A type 1-D-like	3.5
2	403270761	histone H1.1-like	1.5
2	403270775	histone H2B type 1-A-like	4
2	403271044	histone H2B type 1-H-like	1.5
2	403271125	tubulin beta-2A chain-like	2
2	403271274	phosphoglucomutase-2	1
2	403271599	ADP/ATP translocase 2-like isoform 3	1.5
2	403271630	superoxide dismutase [Cu-Zn]	1.5
2	403271674	T-complex protein 1 subunit theta isoform 2	1.5
2	403271724	60S ribosomal protein L36-like isoform 1	1
2	403271767	cystatin-B	1
2	403271851	la-related protein 1B	1
2	403272553	4-trimethylaminobutyraldehyde dehydrogenase isoform 1	1
2	403272671	interferon omega-1	1
2	403273166	hemoglobin subunit alpha-1-like	2.5
2	403273168	hemoglobin subunit alpha-1-like	6
2	403273529	1,4-alpha-glucan-branching enzyme	1
2	403273867	heterogeneous nuclear ribonucleoprotein H3 isoform 1	1.5
2	403273869	heterogeneous nuclear ribonucleoprotein H3 isoform 1	2
2	403274464	erythrocyte membrane protein band 4.2 isoform 2	2.5
2	403274466	erythrocyte membrane protein band 4.2 isoform 3	2.5
2	403274559	40S ribosomal protein S7-like	1.5
2	403274950	sentrin-specific protease 3	3
2	403275062	myosin-10 isoform 3	2
2	403275402	dynein heavy chain 9, axonemal	1
2	403275641	centromere-associated protein E	1.5
2	403276026	pyruvate kinase isozymes M1/M2 isoform 4	1
2	403276098	60S ribosomal protein L4-like	1.5
2	403276525	ubinuclein-2	1
2	403276803	60S acidic ribosomal protein P0-like isoform 2	1
2	403276997	fructose-bisphosphate aldolase A isoform 1	2.5
2	403277480	bifunctional glutamate/proline--tRNA ligase isoform 2	1
2	403277662	C4b-binding protein alpha chain-like	1
2	403277799	proteasome subunit alpha type-3 isoform 1	2.5
2	403278022	ERO1-like protein alpha, partial	1
2	403278163	macrophage mannose receptor 1	1
2	403278330	histone H3.3-like	3
2	403278377	septin-7	1.5
2	403278462	phosphoglycerate mutase 2	2
2	403278598	peptidyl-prolyl cis-trans isomerase A-like	1.5
2	403278948	WD repeat-containing protein 48	1
2	403279427	importin subunit beta-1 isoform 1	1
2	403279502	ubiquitin-conjugating enzyme E2 Z	1
2	403279766	gamma-enolase isoform 2	6
2	403280029	homeobox protein Hox-B4	1.5
2	403280460	septin-9 isoform 1	1
2	403281173	alpha tubulin 2	2
2	403281270	microtubule-associated protein RP/EB family member 1	1.5
2	403281647	aldehyde dehydrogenase, mitochondrial isoform 1	2.5
2	403281663	serine/threonine protein phosphatase PP1	1
2	403282249	succinate dehydrogenase [ubiquinone] flavoprotein subunit, mitochondrial isoform 1	1.5
2	403282321	exportin-2 isoform 1	1
2	403282338	40S ribosomal protein SA-like	1
2	403282697	elongation factor 1-alpha 2	2.5
2	403283220	probable Xaa-Pro aminopeptidase 3	1.5
2	403283349	T-complex protein 1 subunit zeta-2 isoform 1	1
2	403284182	guanine nucleotide-binding protein G(k) subunit alpha	1.5
2	403284842	ubiquitin-60S ribosomal protein L40-like isoform 4	2.5
2	403284844	ubiquitin-60S ribosomal protein L40-like isoform 2	2.5
2	403285040	glyceraldehyde-3-phosphate dehydrogenase-like	1
2	403285046	superoxide dismutase [Mn], mitochondrial	1
2	403285083	protocadherin Fat 1	2
2	403285519	40S ribosomal protein S14 isoform 2	4.5
2	403286101	myosin-4-like	1
2	403286232	plastin-2 isoform 2	3
2	403286841	alpha-adducin isoform 1	1
2	403286843	alpha-adducin isoform 2	1.5
2	403287392	heterogeneous nuclear ribonucleoprotein R isoform 1	1
2	403287619	SH3 domain-binding glutamic acid-rich-like protein 3	1
2	403287876	putative heterogeneous nuclear ribonucleoprotein A1-like 3-like	1.5
2	403287973	chromobox protein homolog 3 isoform 2	1
2	403288083	dynein heavy chain 11, axonemal	1
2	403288113	peptidyl-prolyl cis-trans isomerase A-like	1.5
2	403288248	trifunctional enzyme subunit beta, mitochondrial	1.5
2	403288953	V-type proton ATPase subunit B, brain isoform	1.5
2	403289005	peptidyl-prolyl cis-trans isomerase A-like	3
2	403289299	actin, alpha cardiac muscle 1	1.5
2	403289466	plastin-3 isoform 1	1
2	403289472	plastin-3 isoform 3	1
2	403290056	histone-lysine N-methyltransferase, H3 lysine-36 and H4 lysine-20 specific	1
2	403290172	nucleophosmin isoform 3	1
2	403290290	PDZ domain-containing protein 2	1
2	403290295	zinc finger RNA-binding protein	1
2	403291199	guanine nucleotide-binding protein G(i) subunit alpha-2 isoform 1	1.5
2	403291714	ubiquitin-60S ribosomal protein L40-like	3.5
2	403292054	microtubule-actin cross-linking factor 1, isoforms 1/2/3/5 isoform 1	1.5
2	403292056	microtubule-actin cross-linking factor 1, isoforms 1/2/3/5 isoform 2	1.5
2	403292058	polyadenylate-binding protein 4 isoform 1	1
2	403292076	gap junction alpha-9 protein isoform 1	1
2	403292106	peroxiredoxin-1	1
2	403292443	coiled-coil domain-containing protein 25 isoform 1	1
2	403292919	zinc finger protein 569	1
2	403293113	proteasome subunit beta type-2 isoform 4	1
2	403293223	importin subunit alpha-7	2.5
2	403293613	double-stranded RNA-specific adenosine deaminase	1.5
2	403294323	glutathione reductase, mitochondrial isoform 1	1
2	403294656	receptor-type tyrosine-protein phosphatase C isoform 1	1.5
2	403295191	Hermansky-Pudlak syndrome 4 protein	1
2	403295208	elongation factor 1-alpha 1-like isoform 1	1
2	403295226	elongation factor 1-alpha 1-like isoform 9	1.5
2	403295335	AP-1 complex subunit beta-1	1.5
2	403295559	transmembrane protein 106B	1
2	403295832	testis-specific Y-encoded-like protein 5	1
2	403296085	40S ribosomal protein S28	1
2	403296202	zinc finger protein 555	1
2	403296208	uncharacterized protein LOC101032256	1
2	403296358	ATP synthase subunit gamma, mitochondrial isoform 1	1
2	403296360	ATP synthase subunit gamma, mitochondrial isoform 1	1.5
2	403296565	tubulin alpha-1C chain	3
2	403296715	keratin, type II cytoskeletal 4	2
2	403296717	keratin, type II cytoskeletal 2 oral	1.5
2	403296721	keratin, type II cytoskeletal 4	1
2	403296744	eukaryotic translation initiation factor 4B	1
2	403297089	SWI/SNF complex subunit SMARCC2	1
2	403297205	poly(rC)-binding protein 3 isoform 1	1
2	403297256	40S ribosomal protein S7	1
2	403297332	40S ribosomal protein S19-like	1.5
2	403297617	protein DJ-1 isoform 1	1.5
2	403297991	voltage-dependent anion-selective channel protein 2 isoform 2	2
2	403298182	calmodulin	2
2	403298189	26S protease regulatory subunit 4	2.5
2	403298228	tropomyosin beta chain isoform 2	1
2	403298499	formin-binding protein 1	1
2	403298632	thiosulfate sulfurtransferase/rhodanese-like domain-containing protein 2	1
2	403298703	fructose-bisphosphate aldolase B	1.5
2	403299394	apolipoprotein E	1.5
2	403299513	myosin-14	2
2	403299649	U2 small nuclear ribonucleoprotein A'	1
2	403299795	60S ribosomal protein L12	1.5
2	403300123	uncharacterized protein LOC101032377	4
2	403300660	ubiquitin-conjugating enzyme E2 K isoform 1	1
2	403300940	heterogeneous nuclear ribonucleoprotein K isoform 4	3.5
2	403301842	kanadaptin	1.5
2	403302104	E3 ubiquitin-protein ligase DTX3L	1.5
2	403302240	calreticulin	1.5
2	403302246	UV excision repair protein RAD23 homolog A isoform 1	3
2	403302783	histone H2A type 2-A-like	1
2	403303032	plectin	1.5
2	403303098	S-adenosylmethionine synthase isoform type-2	1
2	403303267	S-formylglutathione hydrolase	2
2	403303409	6-phosphogluconolactonase	1
2	403303411	niban-like protein 2	1
2	403303762	26S protease regulatory subunit 8 isoform 1	1
2	403303806	probable ATP-dependent RNA helicase DDX5 isoform 1	1
2	403304032	serine/threonine-protein kinase ATR	1
2	403304038	plastin-1 isoform 1	1
2	403304296	tubulin alpha-8 chain	5
2	403304494	keratin, type I cytoskeletal 14	2.5
2	403304514	keratin, type I cytoskeletal 25	1.5
2	403304547	keratin, type I cytoskeletal 28	2.5
2	403304549	keratin, type I cytoskeletal 26	2.5
2	403304777	ninein-like protein	1
2	403305174	non-POU domain-containing octamer-binding protein isoform 1	1
2	403305176	non-POU domain-containing octamer-binding protein isoform 1	1
2	403305278	rRNA 2'-O-methyltransferase fibrillarin	1.5
2	403305707	mucin-5B	1
2	403305813	heat shock 70 kDa protein 6, partial	4
2	403305871	peptidyl-prolyl cis-trans isomerase A-like	2
2	403306853	isocitrate dehydrogenase [NAD] subunit gamma, mitochondrial	1.5
2	403306896	filamin-A isoform 1	6
2	403307118	zinc finger protein 416	1.5
2	403307281	40S ribosomal protein S9	1.5
2	403307631	zinc finger protein 350	1
2	403307790	complement C4-A isoform 1	1.5
2	403307792	complement C4-A isoform 1	2.5
2	403307798	helicase SKI2W isoform 2	1.5
2	403307814	heat shock 70 kDa protein 1-like	4.5
2	403307819	valine--tRNA ligase	1
2	403307829	chloride intracellular channel protein 1 isoform 1	1.5
2	403307907	spliceosome RNA helicase DDX39B	1.5
2	403308090	40S ribosomal protein S4, X isoform	1
2	403308695	histone H2A type 1-like	1.5
2	403308840	T-complex protein 1 subunit zeta	1.5
2	403308871	histone H2B type 1-J-like isoform 1	1
2	403308897	RAS protein activator like-3	1
2	403309192	alpha-2-macroglobulin-like, partial	1
2	403309405	prostaglandin E synthase 3-like isoform 1	1
1	393281674	ATP synthase F0 subunit 6 (mitochondrion)	1
1	403254012	60S ribosomal protein L21-like	1
1	403254049	RING finger protein 17	1
1	403254053	ankyrin repeat domain-containing protein 20B-like	1
1	403254132	interferon-induced very large GTPase 1-like	1
1	403254174	ovochymase-2	1
1	403254176	olfactory receptor 481-like	1
1	403254180	olfactory receptor 5P2-like	1
1	403254223	AMP deaminase 3 isoform 1	1
1	403254231	AMP deaminase 3 isoform 5	1
1	403254365	L-lactate dehydrogenase A-like 6A	2
1	403254384	immunoglobulin superfamily member 22	1
1	403254459	histone H3	4
1	403254571	CD44 antigen	2
1	403254583	tripartite motif-containing protein 44	1
1	403254639	zinc finger protein 862	1
1	403254687	zinc finger protein 408 isoform 1	1
1	403254697	prothrombin isoform 2	3
1	403254770	olfactory receptor 4A16-like	1
1	403254960	olfactory receptor 4D11-like	1
1	403255033	sn1-specific diacylglycerol lipase alpha	1
1	403255092	neutral alpha-glucosidase AB isoform 2	1
1	403255199	neuroligin-4, X-linked isoform 2	1
1	403255220	F-box-like/WD repeat-containing protein TBL1X	1
1	403255256	cytochrome c-like	2
1	403255280	oral-facial-digital syndrome 1 protein isoform 1	1
1	403255390	sacsin	1
1	403255403	dynein heavy chain domain-containing protein 1	1
1	403255430	myotubularin-related protein 13	1
1	403255455	otogelin	1
1	403255489	DEP domain-containing protein 7	1
1	403255536	olfactory receptor 4A15-like	1
1	403255650	solute carrier family 22 member 9	1
1	403255925	interleukin-4 isoform 2	1
1	403255937	prolyl 4-hydroxylase subunit alpha-2 isoform 5	1
1	403255973	histidine triad nucleotide-binding protein 1	1
1	403256066	dmX-like protein 1 isoform 1	1
1	403256101	geranylgeranyl transferase type-1 subunit beta	1
1	403256103	E3 ubiquitin-protein ligase TRIM36 isoform 1	1
1	403256122	adenomatous polyposis coli protein isoform 1	1
1	403256174	peptidyl-glycine alpha-amidating monooxygenase isoform 1	1
1	403256189	chromodomain-helicase-DNA-binding protein 1	1
1	403256193	serine/threonine-protein kinase RIO2	1
1	403256210	calpastatin isoform 3	4
1	403256276	DNA-directed RNA polymerase III subunit RPC7 isoform 2	1
1	403256334	uncharacterized protein LOC101039959	1
1	403256371	thrombospondin-4	1
1	403256376	metaxin-3 isoform 3	1
1	403256485	protein prune homolog 2	1
1	403256487	vacuolar protein sorting-associated protein 13A isoform 1	1
1	403256532	protein PRRC2B	1
1	403256703	ras-specific guanine nucleotide-releasing factor 2, partial	1
1	403256752	laminin subunit gamma-3	1
1	403256756	solute carrier family 13 member 4	1
1	403256787	exocyst complex component 4 isoform 1	1
1	403256903	solute carrier family 13 member 1	1
1	403256924	protein Wnt-16 isoform 1	1
1	403256938	ankyrin repeat domain-containing protein 7	1
1	403257006	dedicator of cytokinesis protein 3	1
1	403257034	dihydrolipoyl dehydrogenase, mitochondrial isoform 1	1
1	403257057	phosphatidylinositol 4,5-bisphosphate 3-kinase catalytic subunit gamma isoform isoform 1	1
1	403257069	ataxin-7-like protein 1	1
1	403257085	histone-lysine N-methyltransferase MLL5	1
1	403257091	lipoma HMGIC fusion partner-like 3 protein isoform 1	1
1	403257202	putative heterogeneous nuclear ribonucleoprotein A1-like 3-like	2
1	403257205	disintegrin and metalloproteinase domain-containing protein 22 isoform 1	1
1	403257228	metalloreductase STEAP1	1
1	403257313	retrotransposon-derived protein PEG10	1
1	403257386	elongation factor 1-alpha 1-like isoform 2	1
1	403257388	uncharacterized protein LOC101033423	1
1	403257390	NADH dehydrogenase [ubiquinone] 1 alpha subcomplex subunit 4-like	1
1	403257401	G patch domain-containing protein 3	1
1	403257488	transportin-3	1
1	403257528	uncharacterized protein LOC101042831	1
1	403257535	calcium-independent phospholipase A2-gamma	1
1	403257537	laminin subunit beta-1	1
1	403257539	conserved oligomeric Golgi complex subunit 5	1
1	403257565	heat shock protein 105 kDa-like	2
1	403257614	outer dense fiber protein 2-like	1
1	403257698	far upstream element-binding protein 1 isoform 2	1
1	403257700	nexilin	1
1	403257767	zinc finger Ran-binding domain-containing protein 2-like isoform 1	1
1	403257817	plasminogen activator inhibitor 1 RNA-binding protein-like isoform 1	1
1	403257819	plasminogen activator inhibitor 1 RNA-binding protein-like isoform 2	1
1	403257871	putative tyrosine-protein phosphatase auxilin isoform 2	1
1	403257920	LINE-1 type transposase domain-containing protein 1	1
1	403258058	terminal uridylyltransferase 4	1
1	403258139	UMP-CMP kinase isoform 1	2
1	403258161	zinc finger protein 774	1
1	403258181	protein S100-A10-like isoform 2	2
1	403258183	vacuolar protein sorting-associated protein 33B isoform 1	1
1	403258216	60S ribosomal protein L7a-like	1
1	403258226	Fanconi anemia group I protein isoform 1	1
1	403258276	ectoderm-neural cortex protein 2	1
1	403258367	ras-specific guanine nucleotide-releasing factor 1-like	1
1	403258383	spermatogenesis-associated protein 1	1
1	403258399	ubiquitin carboxyl-terminal hydrolase 33	1
1	403258419	60S ribosomal protein L8-like	1
1	403258444	tetratricopeptide repeat protein 22	1
1	403258454	low-density lipoprotein receptor-related protein 8	1
1	403258464	vitamin B12 transport periplasmic protein BtuE-like	3
1	403258491	repulsive guidance molecule A	1
1	403258538	zinc finger protein 592	1
1	403258540	alpha-protein kinase 3	1
1	403258552	BTB/POZ domain-containing protein 1	1
1	403258559	ADAMTS-like protein 3	1
1	403258564	RNA-binding protein MEX3B, partial	1
1	403258654	interferon-inducible double stranded RNA-dependent protein kinase activator A isoform 1	1
1	403258658	pejvakin	1
1	403258762	rap guanine nucleotide exchange factor 4-like	2
1	403258781	calcium-binding mitochondrial carrier protein Aralar1 isoform 2	1
1	403258807	serine/threonine-protein kinase tousled-like 1	1
1	403258819	lupus La protein	1
1	403258841	bile salt export pump	1
1	403258941	protein TANC1 isoform 1	1
1	403258975	glycerol-3-phosphate dehydrogenase, mitochondrial isoform 1	1
1	403259021	enhancer of polycomb homolog 2	1
1	403259023	methyl-CpG-binding domain protein 5	1
1	403259068	lactase-phlorizin hydrolase	1
1	403259078	zinc finger Ran-binding domain-containing protein 3	1
1	403259169	low-density lipoprotein receptor-related protein 2	1
1	403259245	leucine-rich repeat-containing protein 27 isoform 1	1
1	403259260	antigen KI-67 isoform 1	1
1	403259371	fibroblast growth factor receptor 2 isoform 2	1
1	403259385	zinc finger protein 124-like	1
1	403259410	protein CASC2, isoform 3-like	1
1	403259426	heat shock 70 kDa protein 12A isoform 2	1
1	403259466	von Willebrand factor A domain-containing protein 2	1
1	403259685	PDZ domain-containing protein 7	1
1	403259689	leucine zipper putative tumor suppressor 2 isoform 1	1
1	403259735	dynamin-binding protein	1
1	403259799	ankyrin repeat domain-containing protein 2	1
1	403259809	RRP12-like protein	1
1	403259902	centrosomal protein of 55 kDa isoform 2	1
1	403259936	fibroblast growth factor-binding protein 3 isoform 1	1
1	403259958	kinesin-like protein KIF20B	1
1	403260075	uncharacterized protein LOC101051140	1
1	403260077	glutaredoxin-3	2
1	403260081	dedicator of cytokinesis protein 1	1
1	403260096	uncharacterized protein LOC101029096	1
1	403260100	deleted in malignant brain tumors 1 protein-like	2
1	403260104	transforming acidic coiled-coil-containing protein 2	1
1	403260142	structural maintenance of chromosomes protein 3	2
1	403260168	arsenite methyltransferase	1
1	403260207	uncharacterized protein C10orf12 homolog	1
1	403260347	WW domain-binding protein 1	2
1	403260387	early growth response protein 4	3
1	403260389	T-complex protein 1 subunit eta	1
1	403260403	exocyst complex component 6B	1
1	403260407	dysferlin isoform 1	1
1	403260498	max dimerization protein 1 isoform 1	1
1	403260502	U4/U6.U5 small nuclear ribonucleoprotein 27 kDa protein	1
1	403260595	EH domain-binding protein 1 isoform 1	1
1	403260611	T-complex protein 1 subunit delta isoform 2	4
1	403260660	translation initiation factor IF-2, mitochondrial	1
1	403260675	proteasome activator complex subunit 4	1
1	403260690	neurexin-1-alpha isoform 4	1
1	403260745	GRIP and coiled-coil domain-containing protein 2 isoform 1	1
1	403260747	GRIP and coiled-coil domain-containing protein 2 isoform 2	1
1	403260763	60S ribosomal protein L26-like	1
1	403260782	probable G-protein coupled receptor 45	1
1	403260784	28S ribosomal protein S9, mitochondrial	1
1	403260814	interleukin-1 receptor type 2 isoform 2	1
1	403260846	palmitoyltransferase ZDHHC7	1
1	403260866	interferon regulatory factor 8	1
1	403260884	ferritin heavy chain-like	3
1	403260917	uncharacterized protein C2orf78-like	2
1	403260981	lutropin-choriogonadotropic hormone receptor	1
1	403261112	transcription regulator protein BACH2	1
1	403261119	ankyrin repeat domain-containing protein 6	1
1	403261121	LYR motif-containing protein 2	1
1	403261173	uncharacterized protein C6orf163 homolog	1
1	403261194	protein QN1 homolog	1
1	403261212	inactive serine protease 35	1
1	403261407	alanine--tRNA ligase, mitochondrial	1
1	403261500	transcription factor AP-2-delta	1
1	403261554	vacuolar protein sorting-associated protein 52 homolog	1
1	403261585	protein CutA isoform 4	1
1	403261587	protein CutA isoform 3	2
1	403261610	high mobility group protein HMG-I/HMG-Y isoform 4	1
1	403261614	high mobility group protein HMG-I/HMG-Y isoform 4	1
1	403261684	mitogen-activated protein kinase 14	1
1	403261688	uncharacterized protein C6orf222 homolog	2
1	403261734	bombesin receptor-activated protein C6orf89 homolog isoform 1	1
1	403261794	kinesin-like protein KIF6 isoform 1	1
1	403261856	unconventional myosin-VI isoform 1	1
1	403261864	28 kDa heat- and acid-stable phosphoprotein-like	2
1	403261912	ubiquitin carboxyl-terminal hydrolase 49	1
1	403261919	E3 ubiquitin-protein ligase UBR2	1
1	403261999	PH-interacting protein	1
1	403262047	ubiquilin-like protein	1
1	403262224	ADP-ribosylation factor 1-like	1
1	403262513	uncharacterized protein C11orf63 homolog	1
1	403262546	rho guanine nucleotide exchange factor 12	1
1	403262551	POU domain, class 2, transcription factor 3	1
1	403262586	porphobilinogen deaminase isoform 3	2
1	403262588	porphobilinogen deaminase isoform 3	3
1	403262624	pleckstrin homology-like domain family B member 1 isoform 1	1
1	403262636	ATP synthase subunit g, mitochondrial	1
1	403262705	prothymosin alpha-like	1
1	403262738	protein FAM55D-like	1
1	403262742	RNA-binding protein 7	1
1	403262865	exophilin-5	1
1	403262869	serine-protein kinase ATM	1
1	403262877	cullin-5	1
1	403262946	baculoviral IAP repeat-containing protein 3	1
1	403262954	uncharacterized protein KIAA1377 homolog	1
1	403262979	contactin-5	1
1	403263046	hemoglobin subunit epsilon-4-like	1
1	403263060	olfactory receptor 52M1-like	1
1	403263212	uncharacterized protein C11orf71 homolog	2
1	403263214	transmembrane protease serine 5	1
1	403263218	dihydrolipoyllysine-residue acetyltransferase component of pyruvate dehydrogenase complex, mitochondrial	1
1	403263352	heterogeneous nuclear ribonucleoprotein D0 isoform 2	1
1	403263354	heterogeneous nuclear ribonucleoprotein D0 isoform 2	2
1	403263388	heparanase isoform 1	1
1	403263414	RNA-binding motif protein, X chromosome-like	1
1	403263467	probable E3 ubiquitin-protein ligase HERC6 isoform 2	1
1	403263542	probable ubiquitin carboxyl-terminal hydrolase FAF-X isoform 2	1
1	403263579	synaptotagmin-like protein 5	1
1	403263622	melanoma-associated antigen B2-like	1
1	403263636	putative SMEK homolog 3-like	1
1	403263721	pyruvate dehydrogenase E1 component subunit alpha, somatic form, mitochondrial isoform 1	1
1	403263743	G-protein coupled receptor 64 isoform 11	1
1	403263745	phosphorylase b kinase regulatory subunit alpha, liver isoform	1
1	403263767	ralBP1-associated Eps domain-containing protein 2	1
1	403263773	protein Shroom3	2
1	403263807	phosphatidate cytidylyltransferase 1	1
1	403263850	uncharacterized protein CXorf22 homolog	1
1	403263885	spermine synthase	1
1	403263888	connector enhancer of kinase suppressor of ras 2	1
1	403263944	40S ribosomal protein S17-like	1
1	403264006	G2/M phase-specific E3 ubiquitin-protein ligase isoform 1	1
1	403264064	pumilio domain-containing protein C14orf21 homolog	1
1	403264076	cell death activator CIDE-B	1
1	403264096	proteasome activator complex subunit 2	1
1	403264198	protein arginine N-methyltransferase 5 isoform 1	1
1	403264212	matrix metalloproteinase-14	1
1	403264235	olfactory receptor 10G3-like	1
1	403264352	homeobox protein SIX1	2
1	403264460	eukaryotic translation initiation factor 2 subunit 1	1
1	403264482	ubiquitin-60S ribosomal protein L40-like isoform 1	5
1	403264497	alpha-actinin-1 isoform 1	1
1	403264501	alpha-actinin-1 isoform 3	1
1	403264525	uncharacterized protein KIAA0247 homolog	1
1	403264557	60S ribosomal protein L6-like	2
1	403264638	ubiquinone biosynthesis monooxygenase COQ6	2
1	403264654	latent-transforming growth factor beta-binding protein 2	1
1	403264747	transmembrane protein 63C	1
1	403264871	myosin-6	1
1	403264922	nesprin-2	1
1	403264933	zinc finger FYVE domain-containing protein 26	1
1	403265002	ATP synthase subunit alpha, mitochondrial isoform 2	2
1	403265004	ATP synthase subunit alpha, mitochondrial isoform 3	5
1	403265082	zinc finger protein 24	1
1	403265125	beta-1,4-galactosyltransferase 6 isoform 2	1
1	403265136	desmoglein-1	1
1	403265158	proteasome subunit alpha type-7-like isoform 1	1
1	403265162	protein SSXT isoform 1	1
1	403265181	tetratricopeptide repeat protein 39C	1
1	403265185	niemann-Pick C1 protein	1
1	403265187	serine/threonine-protein kinase RIO3 isoform 1	1
1	403265189	serine/threonine-protein kinase RIO3 isoform 2	1
1	403265205	GREB1-like protein	1
1	403265214	ubiquitin carboxyl-terminal hydrolase 14 isoform 2	1
1	403265218	ubiquitin carboxyl-terminal hydrolase 14 isoform 4	2
1	403265263	homeobox protein TGIF1 isoform 1	1
1	403265300	laminin subunit alpha-1	1
1	403265309	protein SOGA2	2
1	403265339	vesicle-associated membrane protein-associated protein B/C	1
1	403265397	mRNA cap guanine-N7 methyltransferase	1
1	403265411	ankyrin repeat domain-containing protein 62	3
1	403265441	laminin subunit alpha-3	1
1	403265457	abhydrolase domain-containing protein 3	1
1	403265461	EMILIN-2	1
1	403265525	oxidoreductase NAD-binding domain-containing protein 1 isoform 1	1
1	403265529	polypeptide N-acetylgalactosaminyltransferase-like protein 2	1
1	403265826	ras-related protein Rab-6B isoform 1	1
1	403265892	traf2 and NCK-interacting protein kinase isoform 1	1
1	403265962	40S ribosomal protein SA-like	1
1	403266072	erythrocyte band 7 integral membrane protein isoform 2	6
1	403266079	complement C5	1
1	403266093	26S proteasome non-ATPase regulatory subunit 5 isoform 2	3
1	403266097	CDK5 regulatory subunit-associated protein 2 isoform 1	1
1	403266103	toll-like receptor 4 isoform 2	1
1	403266117	tumor necrosis factor ligand superfamily member 8	1
1	403266127	V-type proton ATPase subunit G 1	1
1	403266214	sushi, von Willebrand factor type A, EGF and pentraxin domain-containing protein 1	1
1	403266239	actin-like protein 7A	1
1	403266299	phosducin	1
1	403266307	hemicentin-1	1
1	403266313	influenza virus NS1A-binding protein	1
1	403266353	laminin subunit gamma-1	1
1	403266374	voltage-dependent R-type calcium channel subunit alpha-1E isoform 1	2
1	403266510	vesicle-associated membrane protein 4 isoform 1	1
1	403266688	probable E3 ubiquitin-protein ligase TRIP12 isoform 1	1
1	403266698	PTB-containing, cubilin and LRP1-interacting protein isoform 2	1
1	403266728	dedicator of cytokinesis protein 10 isoform 1	1
1	403266753	potassium voltage-gated channel subfamily E member 4	1
1	403266755	ubiquitin-conjugating enzyme E2 L3-like	2
1	403266761	ran-specific GTPase-activating protein-like	1
1	403266763	paired box protein Pax-3 isoform 1	1
1	403266833	myosin regulatory light polypeptide 9-like	1
1	403266837	beta-crystallin A2	1
1	403266870	villin-1	1
1	403266929	60S ribosomal protein L37a-like isoform 2	1
1	403266948	bifunctional purine biosynthesis protein PURH isoform 2	4
1	403266966	receptor tyrosine-protein kinase erbB-4 isoform 1	1
1	403266991	protein unc-80 homolog isoform 1	1
1	403266995	microtubule-associated protein 2	1
1	403267050	DBF4-type zinc finger-containing protein 2	1
1	403267163	NIF3-like protein 1	1
1	403267173	aldehyde oxidase-like isoform 1	1
1	403267183	SPATS2-like protein isoform 3	1
1	403267185	SPATS2-like protein isoform 2	1
1	403267187	SPATS2-like protein isoform 3	1
1	403267217	60 kDa heat shock protein, mitochondrial isoform 3	6
1	403267223	10 kDa heat shock protein, mitochondrial	1
1	403267243	dynein heavy chain 7, axonemal	1
1	403267265	sphingosine-1-phosphate phosphatase 2	1
1	403267321	NADH-ubiquinone oxidoreductase 75 kDa subunit, mitochondrial	1
1	403267399	MARVEL domain-containing protein 2 isoform 1	1
1	403267451	small nuclear ribonucleoprotein Sm D2	2
1	403267507	cAMP-specific 3',5'-cyclic phosphodiesterase 4D isoform 1	2
1	403267570	putative sodium-coupled neutral amino acid transporter 9	1
1	403267698	tetratricopeptide repeat protein 33 isoform 1	1
1	403267705	prostaglandin E2 receptor EP4 subtype	1
1	403267742	ran-binding protein 3-like	1
1	403267780	ribosome biogenesis protein BRX1 homolog	1
1	403267863	nuclear pore complex protein Nup155	1
1	403268013	zinc finger protein 532 isoform 1	1
1	403268017	alpha-protein kinase 2	1
1	403268039	WD repeat-containing protein 7 isoform 1	1
1	403268073	RNA-binding protein MEX3C	1
1	403268146	sal-like protein 3	1
1	403268168	PH domain leucine-rich repeat-containing protein phosphatase 1, partial	1
1	403268236	ruvB-like 1 isoform 2	2
1	403268285	rhodopsin	1
1	403268287	methyl-CpG-binding domain protein 4	1
1	403268475	FYVE and coiled-coil domain-containing protein 1	2
1	403268534	neurobeachin-like protein 2	1
1	403268539	kinesin-like protein KIF9 isoform 1	1
1	403268573	putative uncharacterized protein C8orf73 homolog	1
1	403268621	collagen alpha-1(XII) chain isoform 1	2
1	403268649	opioid growth factor receptor-like protein 1	1
1	403268662	protein FAM135A isoform 1	1
1	403268777	proteasome subunit beta type-9	2
1	403268781	proteasome subunit beta type-8 isoform 2	2
1	403268879	protein eyes shut homolog	1
1	403268890	pre-mRNA-splicing factor SYF1-like	1
1	403268939	zinc finger protein GLI1 isoform 2	1
1	403268953	kinesin heavy chain isoform 5A isoform 2	1
1	403269168	branched-chain-amino-acid aminotransferase, cytosolic isoform 1	1
1	403269172	lymphoid-restricted membrane protein	1
1	403269196	inositol 1,4,5-trisphosphate receptor type 2	1
1	403269246	fatty acyl-CoA reductase 2 isoform 1	1
1	403269255	60S ribosomal protein L7a-like isoform 1	1
1	403269337	PDZ domain-containing RING finger protein 4 isoform 1	1
1	403269389	pregnancy zone protein	1
1	403269393	small nuclear ribonucleoprotein F	1
1	403269454	uncharacterized protein LOC101046096	1
1	403269462	interleukin-1 receptor-associated kinase 3	1
1	403269485	coiled-coil domain-containing protein 155-like	1
1	403269487	GTPase Era, mitochondrial-like	1
1	403269506	kinesin-like protein KIF21A	1
1	403269512	mucin-19	1
1	403269568	rho-related GTP-binding protein RhoQ	1
1	403269662	mitogen-activated protein kinase kinase kinase kinase 3 isoform 2	1
1	403269674	serine/arginine-rich splicing factor 7 isoform 2	2
1	403269713	protein midA homolog, mitochondrial isoform 2	1
1	403269773	E3 ubiquitin-protein ligase SHPRH	1
1	403269806	phosphatase and actin regulator 2 isoform 1	1
1	403269816	plasma alpha-L-fucosidase	1
1	403269827	G-protein coupled receptor 126	1
1	403269838	costars family protein ABRACL	1
1	403269893	myosin regulatory light chain 12B-like	2
1	403269910	baculoviral IAP repeat-containing protein 6	1
1	403269914	histone H3-like	6
1	403269936	epithelial cell-transforming sequence 2 oncogene-like	1
1	403270008	multidrug resistance-associated protein 5	1
1	403270128	adiponectin isoform 1	1
1	403270187	probable cation-transporting ATPase 13A5	1
1	403270207	transcription factor HES-1	1
1	403270232	serine/threonine-protein kinase B-raf isoform 2	1
1	403270344	actin-related protein 2/3 complex subunit 4 isoform 3	1
1	403270350	peregrin isoform 2	1
1	403270378	E3 ubiquitin-protein ligase RAD18	1
1	403270385	uncharacterized protein C3orf32 homolog isoform 2	1
1	403270410	inositol 1,4,5-trisphosphate receptor type 1	1
1	403270438	actin-like protein 6A	1
1	403270442	ubiquitin carboxyl-terminal hydrolase 13	1
1	403270466	chordin, partial	1
1	403270470	vacuolar protein sorting-associated protein 8 homolog	1
1	403270485	uncharacterized protein LOC101046302	1
1	403270519	ribonuclease H2 subunit B	1
1	403270527	copper-transporting ATPase 2 isoform 1	1
1	403270539	thrombospondin type-1 domain-containing protein 1 isoform 1	1
1	403270545	suppressor of G2 allele of SKP1 homolog isoform 2	1
1	403270607	protein disulfide-isomerase A6 isoform 2	2
1	403270611	hippocalcin-like protein 1	1
1	403270631	arf-GAP with SH3 domain, ANK repeat and PH domain-containing protein 2 isoform 1	1
1	403270633	arf-GAP with SH3 domain, ANK repeat and PH domain-containing protein 2 isoform 2	1
1	403270641	kinase D-interacting substrate of 220 kDa	1
1	403270649	radical S-adenosyl methionine domain-containing protein 2	1
1	403270691	ribonucleoside-diphosphate reductase subunit M2	1
1	403270713	histone H4-like	4
1	403270725	histone H2A type 1-like	3
1	403270727	histone H2B type 1-J-like isoform 1	4
1	403270777	histone H2A type 1-A-like	2
1	403270810	40S ribosomal protein S10-like isoform 1	1
1	403270859	GMP reductase 1	1
1	403270958	U11/U12 small nuclear ribonucleoprotein 48 kDa protein	1
1	403271015	serpin B6	1
1	403271023	uncharacterized protein C6orf195 homolog	1
1	403271040	uncharacterized protein LOC101028819	5
1	403271042	uncharacterized protein LOC101029452	6
1	403271067	kinesin-like protein KIF13A	1
1	403271130	ATPase WRNIP1	1
1	403271150	ADP-ribosyl cyclase 2	1
1	403271172	cytosol aminopeptidase	2
1	403271180	ligand-dependent nuclear receptor corepressor-like protein	1
1	403271228	anaphase-promoting complex subunit 4	1
1	403271317	peptidyl-prolyl cis-trans isomerase A-like	3
1	403271395	transient receptor potential cation channel subfamily M member 2 isoform 1	2
1	403271401	6-phosphofructokinase, liver type isoform 2	1
1	403271421	homeobox protein PKNOX1	1
1	403271509	ATP-sensitive inward rectifier potassium channel 15 isoform 6	1
1	403271578	trifunctional purine biosynthetic protein adenosine-3 isoform 2	1
1	403271582	quinone oxidoreductase-like protein 1	1
1	403271632	T-lymphoma invasion and metastasis-inducing protein 1	1
1	403271670	T-complex protein 1 subunit theta isoform 2	1
1	403271672	T-complex protein 1 subunit theta isoform 3	2
1	403271689	hemK methyltransferase family member 2-like isoform 1	1
1	403271700	protocadherin-10-like	1
1	403271739	ADP/ATP translocase 4	1
1	403271779	beta-secretase 2	1
1	403271783	immunoglobulin superfamily member 5	1
1	403271793	biotin--protein ligase	3
1	403271868	testis-specific H1 histone-like	1
1	403271886	T-complex protein 1 subunit beta	1
1	403271969	40S ribosomal protein S12-like	1
1	403271986	neuron navigator 3 isoform 1	1
1	403272022	liprin-alpha-4	1
1	403272153	PRKC apoptosis WT1 regulator protein-like	1
1	403272232	folliculin-interacting protein 2	1
1	403272329	F-box/WD repeat-containing protein 7 isoform 1	1
1	403272342	protein FAM160A1	1
1	403272346	SH3 domain-containing protein 19	1
1	403272348	40S ribosomal protein S3a	1
1	403272371	rho GTPase-activating protein 10	1
1	403272408	OTU domain-containing protein 4	1
1	403272477	kinesin-like protein KIF1A	1
1	403272537	probable small nuclear ribonucleoprotein Sm D2-like	1
1	403272543	LIM homeobox transcription factor 1-alpha isoform 2	1
1	403272555	4-trimethylaminobutyraldehyde dehydrogenase isoform 3	1
1	403272563	protein FAM78B	1
1	403272689	DENN domain-containing protein 4C	1
1	403272696	protein FAM154A	1
1	403272702	elongation factor 1-alpha, somatic form-like	1
1	403272704	uncharacterized protein LOC101041645	1
1	403272722	snRNA-activating protein complex subunit 3	1
1	403272731	FRAS1-related extracellular matrix protein 1	2
1	403272835	endoplasmic reticulum metallopeptidase 1	2
1	403272854	zinc finger protein DZIP1	1
1	403272859	UDP-glucose:glycoprotein glucosyltransferase 2	1
1	403272910	sodium leak channel non-selective protein	1
1	403272943	DNA ligase 4 isoform 1	1
1	403273012	60S ribosomal protein L7-like	2
1	403273025	dedicator of cytokinesis protein 9	1
1	403273038	uncharacterized protein LOC101034842	1
1	403273042	ras-related protein Rab-10-like	1
1	403273045	40S ribosomal protein S3a-like	1
1	403273062	gamma-tubulin complex component 3	1
1	403273119	CGG triplet repeat-binding protein 1 isoform 1	1
1	403273130	ADP-ribosylation factor-like protein 13B isoform 2	1
1	403273173	axin-1 isoform 2	1
1	403273180	calpain-15	1
1	403273274	TBC1 domain family member 24	1
1	403273349	uncharacterized protein LOC101037491	1
1	403273525	ubiquitin carboxyl-terminal hydrolase 7 isoform 2	1
1	403273541	vitamin K-dependent protein S	1
1	403273545	ATP synthase subunit O, mitochondrial-like	1
1	403273646	40S ribosomal protein S2	1
1	403273747	calmodulin, putative	2
1	403273843	ATP-dependent RNA helicase SUPV3L1, mitochondrial	1
1	403273919	transmembrane protein 26	1
1	403274056	pyridoxal-dependent decarboxylase domain-containing protein 1 isoform 1	1
1	403274076	muellerian-inhibiting factor	1
1	403274114	receptor expression-enhancing protein 3	1
1	403274147	vitellogenin-like	1
1	403274167	pinin	1
1	403274229	autophagy-related protein 2 homolog B	1
1	403274266	cytochrome P450 19A1-like	1
1	403274456	protein-glutamine gamma-glutamyltransferase 5 isoform 1	1
1	403274478	stAR-related lipid transfer protein 9 isoform 1	1
1	403274496	calpain-3 isoform 1	1
1	403274549	beta-1,3-galactosyl-O-glycosyl-glycoprotein beta-1,6-N-acetylglucosaminyltransferase 3 isoform 1	1
1	403274662	myocardial zonula adherens protein	1
1	403274665	vacuolar protein sorting-associated protein 13C	1
1	403274676	AP-1 complex subunit beta-1 isoform 2	1
1	403274682	AP-1 complex subunit beta-1 isoform 5	1
1	403274732	acetyl-CoA carboxylase 1 isoform 2	1
1	403274785	glycerophosphodiester phosphodiesterase domain-containing protein 1 isoform 1	1
1	403274796	inactive serine/threonine-protein kinase TEX14 isoform 1	1
1	403274876	very long-chain specific acyl-CoA dehydrogenase, mitochondrial isoform 2	3
1	403274914	eukaryotic translation initiation factor 5A-1 isoform 1	1
1	403274932	DNA-directed RNA polymerase II subunit RPB1	1
1	403274946	spermatid maturation protein 1	1
1	403274986	dynein heavy chain 2, axonemal	1
1	403275012	epidermis-type lipoxygenase 3	1
1	403275054	nuclear distribution protein nudE-like 1 isoform 2	1
1	403275066	major facilitator superfamily domain-containing protein 6-like	1
1	403275078	glucagon-like peptide 2 receptor	2
1	403275094	myosin-3	1
1	403275107	dual specificity mitogen-activated protein kinase kinase 4	1
1	403275163	serine hydroxymethyltransferase, cytosolic	1
1	403275242	cytospin-B-like isoform 1	2
1	403275261	vacuolar protein sorting-associated protein 53 homolog	1
1	403275283	pre-mRNA-processing-splicing factor 8	1
1	403275338	protein phosphatase 1D	1
1	403275367	uncharacterized protein LOC101030948	1
1	403275390	myosin-13	1
1	403275394	myosin-1	1
1	403275443	DNA topoisomerase 3-alpha	1
1	403275447	phosphoribosyl pyrophosphate synthase-associated protein 2	1
1	403275456	retinoic acid-induced protein 1	1
1	403275468	ubiquitin carboxyl-terminal hydrolase 22	1
1	403275483	glyoxalase domain-containing protein 4	1
1	403275499	phosphatidylinositol transfer protein alpha isoform	1
1	403275532	alpha-protein kinase 1 isoform 2	1
1	403275546	pituitary homeobox 2 isoform 1	1
1	403275568	complement factor I isoform 2	1
1	403275599	TBC domain-containing protein kinase-like protein isoform 1	1
1	403275707	alcohol dehydrogenase class-3	1
1	403275921	insulin-like growth factor I	2
1	403275927	stabilin-2	1
1	403276038	thrombospondin type-1 domain-containing protein 4	1
1	403276050	transducin-like enhancer protein 3	1
1	403276060	acidic leucine-rich nuclear phosphoprotein 32 family member A	1
1	403276125	apoptotic protease-activating factor 1	1
1	403276213	UPF0606 protein KIAA1549 homolog isoform 1	1
1	403276335	zyxin	1
1	403276389	protein disulfide-isomerase A4	1
1	403276406	zinc finger protein 862	1
1	403276422	GTPase IMAP family member 4 isoform 1	1
1	403276448	anion exchange protein 2 isoform 1	1
1	403276460	ATP-binding cassette sub-family C member 11	1
1	403276514	neurotrypsin	1
1	403276535	sugar phosphate exchanger 3	1
1	403276565	kell blood group glycoprotein	1
1	403276569	chloride channel protein 1	1
1	403276731	poly(ADP-ribose) glycohydrolase isoform 1	1
1	403276779	proto-oncogene tyrosine-protein kinase receptor Ret	1
1	403276826	integrin alpha-M	1
1	403276866	uncharacterized protein LOC101042594	1
1	403276872	F-box/LRR-repeat protein 19	1
1	403276902	zinc finger protein 785 isoform 1	1
1	403276914	dCTP pyrophosphatase 1 isoform 1	1
1	403276973	serine/threonine-protein kinase TAO2 isoform 1	1
1	403277062	uromodulin isoform 1	1
1	403277076	THUMP domain-containing protein 1	1
1	403277184	E3 ubiquitin-protein ligase RBBP6 isoform 1	1
1	403277188	trinucleotide repeat-containing gene 6A protein isoform 1	2
1	403277220	exportin-6 isoform 1	1
1	403277224	exportin-6 isoform 3	1
1	403277295	zinc finger protein 112 homolog	1
1	403277380	histone H3.3 isoform 1	1
1	403277394	epoxide hydrolase 1 isoform 1	1
1	403277401	lamin-B receptor isoform 1	1
1	403277428	calpain-2 catalytic subunit isoform 1	1
1	403277438	toll-like receptor 5 isoform 1	1
1	403277467	MOSC domain-containing protein 1, mitochondrial	1
1	403277518	tyrosine-protein phosphatase non-receptor type 14	1
1	403277530	tropomyosin alpha-3 chain-like	2
1	403277568	serine/threonine-protein kinase Nek2 isoform 1	1
1	403277747	RRP15-like protein	1
1	403277831	kinectin isoform 4	1
1	403277855	protein Smaug homolog 1	1
1	403277859	glia maturation factor gamma	1
1	403277906	mitogen-activated protein kinase kinase kinase kinase 5	1
1	403277985	dapper homolog 1	1
1	403278010	WD repeat and HMG-box DNA-binding protein 1	2
1	403278014	phospholipase DDHD1	1
1	403278151	cubilin	1
1	403278219	sickle tail protein homolog	1
1	403278231	probable G-protein coupled receptor 158	1
1	403278270	neuromedin-U receptor 1	1
1	403278303	60S ribosomal protein L4-like	2
1	403278397	engulfment and cell motility protein 1 isoform 3	1
1	403278444	E3 ubiquitin-protein ligase HECW1	1
1	403278464	adipocyte enhancer-binding protein 1	1
1	403278485	2-oxoglutarate dehydrogenase, mitochondrial isoform 2	1
1	403278550	growth factor receptor-bound protein 10 isoform 2	1
1	403278604	unconventional myosin-Ig	1
1	403278606	receptor activity-modifying protein 3	1
1	403278615	polycystic kidney disease protein 1-like 1	1
1	403278630	60S ribosomal protein L35a	1
1	403278712	xin actin-binding repeat-containing protein 1	1
1	403278734	deleted in lung and esophageal cancer protein 1 isoform 1	1
1	403278766	SH3 and cysteine-rich domain-containing protein	1
1	403278771	cAMP-regulated phosphoprotein 21	1
1	403278798	cytoplasmic dynein 1 light intermediate chain 1 isoform 2	1
1	403278869	interleukin-20 receptor subunit beta	1
1	403278871	cytoplasmic protein NCK1 isoform 2	1
1	403278900	extended synaptotagmin-3	1
1	403278930	NK-tumor recognition protein	1
1	403278956	xylulose kinase	1
1	403278962	golgin subfamily A member 4	1
1	403278982	tyrosine-protein kinase RYK	1
1	403279027	probable E3 ubiquitin-protein ligase MYCBP2	2
1	403279141	septin-6 isoform 1	1
1	403279143	septin-6 isoform 3	2
1	403279151	regulator of nonsense transcripts 3B isoform 2	1
1	403279167	transcriptional regulator Kaiso	1
1	403279210	teneurin-1 isoform 1	1
1	403279217	actin-related protein T1	1
1	403279221	probable global transcription activator SNF2L1	2
1	403279286	glypican-4	1
1	403279307	hypoxanthine-guanine phosphoribosyltransferase	1
1	403279364	cohesin subunit SA-2	1
1	403279394	voltage-dependent L-type calcium channel subunit beta-1 isoform 1	1
1	403279411	polycomb group RING finger protein 2 isoform 1	1
1	403279415	proteasome subunit beta type-3	1
1	403279451	transcription factor Sp2 isoform 2	1
1	403279471	chromobox protein homolog 1 isoform 1	2
1	403279612	voltage-dependent T-type calcium channel subunit alpha-1G isoform 14	1
1	403279708	RNA-binding protein Musashi homolog 2	1
1	403279742	putative ATP-dependent RNA helicase DHX33	1
1	403279793	misshapen-like kinase 1 isoform 1	1
1	403279808	proteasome subunit beta type-6 isoform 2	1
1	403279843	kinase suppressor of Ras 1	1
1	403279857	transmembrane protein 97, partial	1
1	403279861	proton-coupled folate transporter isoform 1	1
1	403279909	60S ribosomal protein L23a	2
1	403279925	40S ribosomal protein S2-like	2
1	403279939	ARF GTPase-activating protein GIT1	1
1	403280043	xylosyltransferase 2	1
1	403280047	epsin-3	1
1	403280049	putative uncharacterized protein encoded by LINC00483-like, partial	1
1	403280098	serine/threonine-protein kinase TAO1	1
1	403280102	neurofibromin	1
1	403280252	vitamin K-dependent protein C	3
1	403280285	nck-associated protein 5	1
1	403280386	Fanconi anemia-associated protein of 100 kDa isoform 1	1
1	403280391	putative sodium-coupled neutral amino acid transporter 10 isoform 1	1
1	403280437	soluble calcium-activated nucleotidase 1	1
1	403280462	septin-9 isoform 2	2
1	403280522	envoplakin isoform 1	1
1	403280524	cyclin-dependent kinase 3	1
1	403280528	39S ribosomal protein L38, mitochondrial	1
1	403280591	cerebellar degeneration-related protein 2-like	1
1	403280593	protein hid-1 homolog	1
1	403280611	Na(+)/H(+) exchange regulatory cofactor NHE-RF1	1
1	403280637	protein sidekick-2	1
1	403280729	forkhead box protein K2	1
1	403280738	secreted and transmembrane protein 1	1
1	403280779	uncharacterized protein LOC101052798	1
1	403280812	glutamine-rich protein 2	1
1	403280830	integrin beta-4, partial	2
1	403280850	glutamate [NMDA] receptor subunit epsilon-3	1
1	403280856	G-protein coupled receptor family C group 5 member C	1
1	403280860	protein tweety homolog 2	1
1	403280985	40S ribosomal protein S2-like isoform 1	2
1	403281048	afamin	2
1	403281125	dolichyl-diphosphooligosaccharide--protein glycosyltransferase subunit 2-like	1
1	403281205	gamma-glutamyltransferase 7	1
1	403281228	adenosylhomocysteinase isoform 2	2
1	403281230	RNA-binding protein Raly isoform 1	2
1	403281232	RNA-binding protein Raly isoform 1	1
1	403281236	charged multivesicular body protein 4b	1
1	403281343	ankyrin repeat domain-containing protein 17	2
1	403281374	RNA-binding protein 39	1
1	403281386	short transient receptor potential channel 4-associated protein	1
1	403281402	uncharacterized protein LOC101031269	1
1	403281447	hydroxycarboxylic acid receptor 1	1
1	403281465	MLX-interacting protein	1
1	403281478	lysine-specific demethylase 2B	1
1	403281529	translational activator GCN1	1
1	403281540	citron Rho-interacting kinase isoform 1	1
1	403281555	serine/threonine-protein kinase TAO3 isoform 1	1
1	403281564	kinase suppressor of Ras 2 isoform 1	1
1	403281727	protein phosphatase Slingshot homolog 1	1
1	403281781	coiled-coil domain-containing protein 62	1
1	403281875	SH2B adapter protein 3, partial	1
1	403281895	acetyl-CoA carboxylase 2	1
1	403281924	serine incorporator 1	1
1	403281972	ribosome production factor 2 homolog	1
1	403281989	60S ribosomal protein L23a-like	1
1	403282132	bcl-2-associated transcription factor 1	1
1	403282163	connective tissue growth factor	1
1	403282167	transcriptional activator Myb	1
1	403282245	exocyst complex component 3	1
1	403282265	E3 ubiquitin-protein ligase MARCH6	1
1	403282335	potassium voltage-gated channel subfamily B member 1	1
1	403282356	protein FAM65C	1
1	403282364	activity-dependent neuroprotector homeobox protein isoform 2	1
1	403282498	tubulin beta-1 chain	2
1	403282630	ubiquitin-conjugating enzyme E2 variant 2	1
1	403282691	collagen alpha-1(XX) chain	1
1	403282707	tumor protein D54	2
1	403282722	EF-hand calcium-binding domain-containing protein 6	1
1	403282730	uncharacterized protein KIAA1644 homolog	1
1	403282784	pannexin-2-like	1
1	403282786	putative helicase Mov10l1 isoform 2	1
1	403282930	histone acetyltransferase p300	1
1	403282937	trinucleotide repeat-containing gene 6B protein isoform 2	1
1	403282962	beta-1,4-mannosyl-glycoprotein 4-beta-N-acetylglucosaminyltransferase isoform 1	1
1	403283086	voltage-dependent calcium channel gamma-2 subunit	1
1	403283142	signal peptide, CUB and EGF-like domain-containing protein 1	1
1	403283166	polycystic kidney disease and receptor for egg jelly-related protein, partial	1
1	403283168	tetratricopeptide repeat protein 38	1
1	403283178	protein monoglycylase TTLL8	1
1	403283182	gamma-tubulin complex component 6	2
1	403283238	DNA dC-_dU-editing enzyme APOBEC-3G-like	1
1	403283252	probable ATP-dependent RNA helicase DDX17	2
1	403283268	2-amino-3-ketobutyrate coenzyme A ligase, mitochondrial-like	1
1	403283270	2-amino-3-ketobutyrate coenzyme A ligase, mitochondrial-like	1
1	403283274	galectin-4-like	1
1	403283276	caspase recruitment domain-containing protein 10	1
1	403283351	T-complex protein 1 subunit zeta-2 isoform 2	1
1	403283369	protein unc-45 homolog B isoform 1	2
1	403283463	ATPase family AAA domain-containing protein 2	2
1	403283527	putative heterogeneous nuclear ribonucleoprotein A1-like 3-like isoform 1	1
1	403283529	putative heterogeneous nuclear ribonucleoprotein A1-like 3-like isoform 2	2
1	403283555	zinc finger ZZ-type and EF-hand domain-containing protein 1	1
1	403283601	centrosomal protein kizuna	1
1	403283608	uncharacterized protein C20orf26 homolog	1
1	403283695	threonine aspartase 1	1
1	403283708	UPF0492 protein C20orf94 homolog	1
1	403283781	transcription factor Ovo-like 2	1
1	403283847	tRNA guanosine-2'-O-methyltransferase TRM13 homolog	1
1	403283911	breast cancer anti-estrogen resistance protein 3 isoform 2	1
1	403283982	histone H3.3-like	4
1	403283991	dihydropyrimidine dehydrogenase [NADP(+)]	1
1	403284090	MAP/microtubule affinity-regulating kinase 3 isoform 5	1
1	403284093	TNF receptor-associated factor 3 isoform 1	1
1	403284323	monocarboxylate transporter 1 isoform 2	1
1	403284400	solute carrier family 22 member 15	1
1	403284402	sodium/potassium-transporting ATPase subunit alpha-1	1
1	403284428	transcription termination factor 2	1
1	403284444	WD repeat-containing protein 3	1
1	403284466	uncharacterized protein C14orf80 homolog	1
1	403284487	uncharacterized protein LOC101031694	1
1	403284508	zinc finger protein 839	1
1	403284510	WD repeat-containing protein 20	1
1	403284598	multifunctional protein ADE2 isoform 1	1
1	403284635	platelet-derived growth factor receptor alpha-like	1
1	403284653	sec1 family domain-containing protein 2 isoform 2	1
1	403284665	mitochondria-eating protein	1
1	403284681	protein furry homolog-like	1
1	403284696	NF-X1-type zinc finger protein NFXL1 isoform 2	2
1	403284778	60S ribosomal protein L4-like isoform 1	1
1	403284792	protein NDRG1 isoform 1	2
1	403284870	putative deoxyribonuclease TATDN1	1
1	403284913	nesprin-1	1
1	403284976	T-cell activation Rho GTPase-activating protein	1
1	403284982	T-complex protein 1 subunit alpha	1
1	403284984	acetyl-CoA acetyltransferase, cytosolic	1
1	403284996	plasminogen	1
1	403285007	cAMP and cAMP-inhibited cGMP 3',5'-cyclic phosphodiesterase 10A-like isoform 1	1
1	403285026	F-box only protein 5	1
1	403285063	putative transcriptional regulator encoded by LINC00473-like	1
1	403285095	sorbin and SH3 domain-containing protein 2	1
1	403285173	endonuclease 8-like 3	1
1	403285178	WD repeat-containing protein 17	1
1	403285199	ADP/ATP translocase 1	1
1	403285219	histidine--tRNA ligase, cytoplasmic isoform 1	1
1	403285331	60S ribosomal protein L31-like	1
1	403285404	uncharacterized protein LOC101051953	1
1	403285476	prenylcysteine oxidase-like	1
1	403285489	rod cGMP-specific 3',5'-cyclic phosphodiesterase subunit alpha	1
1	403285495	platelet-derived growth factor receptor beta	1
1	403285533	dynactin subunit 4	1
1	403285535	pre-mRNA-splicing factor RBM22	1
1	403285555	annexin A6 isoform 2	3
1	403285600	la-related protein 1 isoform 1	1
1	403285609	CCR4-NOT transcription complex subunit 8	1
1	403285626	lysine-specific demethylase 3B	1
1	403285630	40S ribosomal protein S13-like	1
1	403285634	heterogeneous nuclear ribonucleoprotein A0	1
1	403285704	CAP-Gly domain-containing linker protein 2	1
1	403285772	ras GTPase-activating protein 4	1
1	403285853	actin-like protein 6B	1
1	403285869	arf-GAP domain and FG repeat-containing protein 2	1
1	403285969	importin subunit alpha-8	1
1	403285979	serine/threonine-protein kinase LMTK2	1
1	403285988	ubiquitin carboxyl-terminal hydrolase 42	2
1	403286038	LIM domain kinase 1	1
1	403286044	abhydrolase domain-containing protein 11	1
1	403286068	SH2B adapter protein 2-like	1
1	403286130	uncharacterized protein LOC101044421	1
1	403286135	roundabout homolog 2 isoform 1	1
1	403286212	A disintegrin and metalloproteinase with thrombospondin motifs 1	1
1	403286236	uncharacterized protein LOC101041990	1
1	403286355	casein kinase I isoform alpha-like	1
1	403286464	sister chromatid cohesion protein PDS5 homolog B	1
1	403286500	ELKS/Rab6-interacting/CAST family member 1 isoform 2	1
1	403286633	G-protein coupled receptor family C group 5 member D	1
1	403286744	solute carrier organic anion transporter family member 1C1 isoform 1	1
1	403286798	rod cGMP-specific 3',5'-cyclic phosphodiesterase subunit beta isoform 2	1
1	403286845	alpha-adducin isoform 3	3
1	403286996	transforming acidic coiled-coil-containing protein 3	1
1	403287022	uncharacterized protein LOC101028087	1
1	403287030	peroxisomal acyl-coenzyme A oxidase 3	1
1	403287039	MORF4 family-associated protein 1	1
1	403287041	uncharacterized protein LOC101032224	1
1	403287142	clathrin interactor 1 isoform 1	1
1	403287259	cation channel sperm-associated protein 4 isoform 2	1
1	403287394	heterogeneous nuclear ribonucleoprotein R isoform 2	1
1	403287399	leucine zipper protein 1	2
1	403287428	cell division control protein 42 homolog	1
1	403287448	endothelin-converting enzyme 1	1
1	403287451	eukaryotic translation initiation factor 4 gamma 3	1
1	403287524	F-actin-capping protein subunit beta isoform 2	2
1	403287533	paired box protein Pax-7	1
1	403287553	protein-arginine deiminase type-2	1
1	403287582	zinc finger and BTB domain-containing protein 17	1
1	403287599	chymotrypsin-like elastase family member 2A	1
1	403287635	uncharacterized protein LOC101031184	1
1	403287641	uncharacterized protein LOC101032433	1
1	403287645	uncharacterized protein LOC101033089	1
1	403287649	60S ribosomal protein L11	1
1	403287655	lysine-specific histone demethylase 1A	1
1	403287708	msx2-interacting protein	1
1	403287716	pleckstrin homology domain-containing family M member 2	1
1	403287722	forkhead-associated domain-containing protein 1	1
1	403287733	10 kDa heat shock protein, mitochondrial-like	1
1	403287881	putative tripartite motif-containing protein 77	1
1	403287885	polyubiquitin-B-like isoform 1	4
1	403287887	polyubiquitin-B-like isoform 2	1
1	403288062	pituitary adenylate cyclase-activating polypeptide type I receptor isoform 1	1
1	403288256	matrilin-3, partial	1
1	403288265	apolipoprotein B-100	1
1	403288332	histone H2B type 3-B-like	2
1	403288334	histone H2B type 1-F/J/L-like	1
1	403288352	small nuclear ribonucleoprotein Sm D2-like isoform 1	2
1	403288506	ryanodine receptor 2	1
1	403288508	alpha-actinin-2	1
1	403288519	syntaxin-binding protein 5-like	1
1	403288543	nuclear receptor subfamily 1 group I member 2	1
1	403288545	AMY-1-associating protein expressed in testis 1	1
1	403288568	beta-1,4-galactosyltransferase 4 isoform 1	1
1	403288630	V-type proton ATPase catalytic subunit A isoform 2	2
1	403288689	pleckstrin homology-like domain family B member 2 isoform 1	1
1	403288731	oxygen-regulated protein 1	1
1	403288756	short-chain dehydrogenase/reductase family 16C member 6-like	1
1	403288933	SH2 domain-containing protein 4A	1
1	403288955	leucine zipper putative tumor suppressor 1	1
1	403289053	amyloid beta A4 precursor protein-binding family A member 1	1
1	403289055	protein FAM189A2	1
1	403289080	dedicator of cytokinesis protein 8	1
1	403289100	G protein pathway suppressor 2-like	1
1	403289138	doublesex- and mab-3-related transcription factor 1	1
1	403289237	mitotic checkpoint serine/threonine-protein kinase BUB1 beta	1
1	403289267	protein FAM98B	1
1	403289303	rho GTPase-activating protein 11A	1
1	403289309	formin-1-like isoform 1	1
1	403289419	small kinetochore-associated protein	1
1	403289421	protein dispatched homolog 2	1
1	403289423	ankyrin repeat domain-containing protein 63	1
1	403289432	ryanodine receptor 3	1
1	403289461	telomerase protein component 1	1
1	403289470	plastin-3 isoform 3	2
1	403289490	angiomotin	1
1	403289547	collagen alpha-5(IV) chain isoform 1	1
1	403289607	nik-related protein kinase	1
1	403289633	collagen alpha-6(IV) chain	1
1	403289680	prolyl endopeptidase	1
1	403289697	BEN domain-containing protein 3 isoform 1	1
1	403289760	60S ribosomal protein L23a-like	1
1	403289777	DNA polymerase zeta catalytic subunit	1
1	403289790	tubulin epsilon chain	1
1	403289866	vacuolar protein sorting-associated protein 13D isoform 1	1
1	403289868	vacuolar protein sorting-associated protein 13D isoform 2	1
1	403289873	tumor necrosis factor receptor superfamily member 8	1
1	403289904	serine/threonine-protein kinase mTOR	1
1	403289910	TAR DNA-binding protein 43	1
1	403289947	40S ribosomal protein S20-like isoform 2	1
1	403289975	glyceraldehyde-3-phosphate dehydrogenase-like	3
1	403290011	uncharacterized protein LOC101043794	1
1	403290122	sideroflexin-1	1
1	403290197	lymphocyte cytosolic protein 2 isoform 2	2
1	403290207	slit homolog 3 protein	1
1	403290213	arginine--tRNA ligase, cytoplasmic	1
1	403290344	short transient receptor potential channel 3 isoform 1	1
1	403290447	cocaine esterase	1
1	403290465	exocyst complex component 3-like protein	1
1	403290473	F-box/LRR-repeat protein 2-like	1
1	403290496	protein FAM65A isoform 1	1
1	403290555	dipeptidase 3	1
1	403290586	uncharacterized protein LOC101046235	1
1	403290657	rho GTPase-activating protein 40	1
1	403290688	serine/arginine-rich splicing factor 6	1
1	403290736	potassium voltage-gated channel subfamily S member 1	1
1	403290800	WAP four-disulfide core domain protein 8	1
1	403290824	zinc finger SWIM domain-containing protein 1	1
1	403290842	zinc finger protein 335 isoform 1	1
1	403290941	matrilin-4	1
1	403290978	2',5'-phosphodiesterase 12	1
1	403290980	ADP-ribosylation factor 4 isoform 1	1
1	403291039	choline dehydrogenase, mitochondrial	1
1	403291043	voltage-dependent L-type calcium channel subunit alpha-1D isoform 2	1
1	403291056	musculoskeletal embryonic nuclear protein 1	1
1	403291058	inter-alpha-trypsin inhibitor heavy chain H4	1
1	403291065	inter-alpha-trypsin inhibitor heavy chain H1	1
1	403291083	5'-nucleotidase domain-containing protein 2 isoform 1	1
1	403291146	IQ domain-containing protein F3	1
1	403291150	metabotropic glutamate receptor 2	1
1	403291155	protein VPRBP isoform 1	1
1	403291239	inositol hexakisphosphate kinase 1	1
1	403291311	serine/threonine-protein kinase Nek4	1
1	403291315	stabilin-1	1
1	403291319	dynein heavy chain 1, axonemal, partial	1
1	403291334	uncharacterized protein LOC101039836	1
1	403291336	dedicator of cytokinesis protein 3	1
1	403291348	E3 ubiquitin-protein ligase RNF123	1
1	403291360	E3 ubiquitin-protein ligase ARIH2	2
1	403291393	ephexin-1	1
1	403291401	autophagy-related protein 16-1 isoform 1	1
1	403291410	Holliday junction recognition protein	1
1	403291565	ankyrin repeat and MYND domain-containing protein 1	1
1	403291596	ribosomal protein S6 kinase alpha-6 isoform 1	1
1	403291670	transcriptional regulator ATRX isoform 3	1
1	403291774	phosphatidylinositol 3-kinase regulatory subunit gamma isoform 1	1
1	403291805	A/G-specific adenine DNA glycosylase isoform 3	1
1	403291828	kinesin-like protein KIF2C isoform 1	1
1	403291830	kinesin-like protein KIF2C isoform 2	1
1	403291949	prolyl 3-hydroxylase 1	1
1	403291969	N-acetylaspartyl-glutamate synthetase A	1
1	403292044	peptidyl-prolyl cis-trans isomerase E isoform 1	1
1	403292046	peptidyl-prolyl cis-trans isomerase E isoform 2	2
1	403292062	polyadenylate-binding protein 4 isoform 3	1
1	403292161	yrdC domain-containing protein, mitochondrial, partial	1
1	403292256	zinc finger protein 26	1
1	403292291	transmembrane protein 132C	1
1	403292386	ADAM DEC1 isoform 1	1
1	403292390	disintegrin and metalloproteinase domain-containing protein 7	1
1	403292392	glial fibrillary acidic protein	1
1	403292394	neurofilament light polypeptide	1
1	403292414	paraneoplastic antigen Ma2 homolog isoform 1	1
1	403292439	epoxide hydrolase 2	1
1	403292445	coiled-coil domain-containing protein 25 isoform 1	1
1	403292449	elongator complex protein 3	1
1	403292478	mitochondrial peptide methionine sulfoxide reductase-like isoform 1	1
1	403292501	dedicator of cytokinesis protein 5	1
1	403292514	kinesin-like protein KIF13B	1
1	403292516	origin recognition complex subunit 6	3
1	403292555	PAP-associated domain-containing protein 5	1
1	403292560	bromodomain-containing protein 7	1
1	403292582	chromodomain-helicase-DNA-binding protein 9	1
1	403292704	CCAAT/enhancer-binding protein gamma	1
1	403292766	lipolysis-stimulated lipoprotein receptor isoform 1	1
1	403292784	suprabasin	1
1	403292786	glyceraldehyde-3-phosphate dehydrogenase, testis-specific	1
1	403292796	RNA-binding protein 42 isoform 1	1
1	403292818	kin of IRRE-like protein 2 isoform 1	1
1	403292838	probable alpha-ketoglutarate-dependent dioxygenase ABH6	1
1	403292876	zinc finger protein 529 isoform 2	1
1	403292903	zinc finger protein 540 isoform 1	1
1	403292940	signal-induced proliferation-associated 1-like protein 3	1
1	403292972	alpha-actinin-4	1
1	403292998	low-density lipoprotein receptor-related protein 3	1
1	403293033	calpain small subunit 1	2
1	403293057	ryanodine receptor 1	1
1	403293062	glutamate receptor, ionotropic kainate 3	1
1	403293085	uncharacterized protein LOC101045922	1
1	403293117	proteasome subunit beta type-2 isoform 4	1
1	403293321	zinc finger MYM-type protein 6	1
1	403293333	eukaryotic translation initiation factor 3 subunit I	1
1	403293343	receptor-type tyrosine-protein phosphatase U	1
1	403293589	alpha-actinin-3	1
1	403293593	dipeptidyl peptidase 3 isoform 2	1
1	403293669	thrombospondin-3 isoform 1	1
1	403293677	pyruvate kinase isozymes R/L isoform 2	3
1	403293679	pyruvate kinase isozymes R/L isoform 3	2
1	403293713	histone-lysine N-methyltransferase ASH1L	1
1	403293789	NAD(P)H-hydrate epimerase	1
1	403293813	high affinity nerve growth factor receptor isoform 1	1
1	403293842	ETS translocation variant 3-like protein	1
1	403293857	Fc receptor-like protein 3 isoform 1	1
1	403294011	myosin light chain 6B isoform 2	1
1	403294040	junctional adhesion molecule A	1
1	403294113	uncharacterized protein C11orf95 homolog	1
1	403294208	coiled-coil domain-containing protein 19, mitochondrial	1
1	403294251	1-phosphatidylinositol 4,5-bisphosphate phosphodiesterase gamma-2	1
1	403294285	protein CREG2, partial	1
1	403294287	DNA-binding protein RFX8	1
1	403294289	mitogen-activated protein kinase kinase kinase kinase 4-like	1
1	403294317	glutathione reductase, mitochondrial isoform 1	1
1	403294321	glutathione reductase, mitochondrial isoform 3	1
1	403294350	peptidyl-prolyl cis-trans isomerase A-like	2
1	403294368	rab11 family-interacting protein 1	1
1	403294428	U6 snRNA-associated Sm-like protein LSm1	1
1	403294492	fructose-1,6-bisphosphatase isozyme 2	1
1	403294498	uncharacterized protein LOC101030049	1
1	403294606	FYVE, RhoGEF and PH domain-containing protein 3	1
1	403294645	protein FAM22A-like	1
1	403294654	V-type proton ATPase subunit G 3	1
1	403294764	synaptotagmin-2	1
1	403294777	transmembrane protein 183A	1
1	403294846	transmembrane protein 81	1
1	403294874	probable carboxypeptidase PM20D1	1
1	403295024	supervillin	1
1	403295026	BMP and activin membrane-bound inhibitor homolog	1
1	403295033	protein SFI1 homolog isoform 3	1
1	403295091	oxysterol-binding protein 2 isoform 3	2
1	403295102	SEC14-like protein 4 isoform 1	1
1	403295154	protein NipSnap homolog 1 isoform 1	1
1	403295179	phosphatidylinositol transfer protein beta isoform isoform 1	1
1	403295314	eukaryotic translation initiation factor 4E transporter	1
1	403295327	uncharacterized protein LOC101049221	1
1	403295333	neurofilament heavy polypeptide	1
1	403295355	seizure 6-like protein	1
1	403295380	putative POM121-like protein 1-like	1
1	403295411	eukaryotic translation initiation factor 3 subunit E isoform 1	2
1	403295506	importin subunit alpha-6	1
1	403295522	high mobility group protein B3-like	1
1	403295529	collagen alpha-1(X) chain	1
1	403295561	von Willebrand factor D and EGF domain-containing protein	1
1	403295594	tetraspanin-13	1
1	403295609	sorting nexin-13	1
1	403295730	N-acetylgalactosaminyltransferase 7	1
1	403295801	RNA-binding protein 12B	1
1	403295847	translationally-controlled tumor protein-like	1
1	403295915	chromatin assembly factor 1 subunit A	1
1	403295925	dipeptidyl peptidase 9	1
1	403296113	olfactory receptor 7G3-like	2
1	403296125	zinc finger protein 699	1
1	403296133	zinc finger protein 561-like isoform 1	1
1	403296194	kelch-like ECH-associated protein 1	1
1	403296256	semaphorin-6B	1
1	403296305	unconventional myosin-If	1
1	403296313	zinc finger protein 560	1
1	403296347	cysteine protease ATG4D	1
1	403296397	rab GDP dissociation inhibitor beta isoform 2	5
1	403296399	ankyrin repeat and SOCS box protein 13	1
1	403296401	calmodulin-like protein 3 isoform 2	1
1	403296430	nucleolar GTP-binding protein 1 isoform 1	1
1	403296487	SLIT and NTRK-like protein 2 isoform 1	1
1	403296535	peptidyl-prolyl cis-trans isomerase FKBP11	1
1	403296537	ADP-ribosylation factor 3 isoform 1	1
1	403296543	ADP-ribosylation factor 3 isoform 4	3
1	403296551	dendrin	1
1	403296567	tubulin alpha-1A chain	4
1	403296591	microspherule protein 1	1
1	403296595	pre-mRNA-processing factor 40 homolog B isoform 2	1
1	403296693	keratin, type II cuticular Hb1	1
1	403296713	keratin, type II cytoskeletal 72 isoform 1	1
1	403296719	keratin, type II cytoskeletal 74	2
1	403296727	keratin, type II cytoskeletal 73	2
1	403296817	FMRFamide-related peptides	1
1	403296931	diacylglycerol kinase alpha isoform 1	1
1	403296967	myosin light polypeptide 6-like, partial	2
1	403297007	histone-lysine N-methyltransferase MLL2	1
1	403297054	separin	1
1	403297071	dnaJ homolog subfamily C member 14	2
1	403297095	citrate synthase, mitochondrial	1
1	403297121	40S ribosomal protein S3a-like isoform 1	1
1	403297238	pericentrin	1
1	403297308	PRA1 family protein 3	1
1	403297571	A-kinase anchor protein 4	1
1	403297701	peroxisome biogenesis factor 10	1
1	403297770	calmodulin-binding transcription activator 1	1
1	403297780	espin	1
1	403297924	phospholipase A-2-activating protein	1
1	403298079	tetra-peptide repeat homeobox protein 1-like	1
1	403298092	annexin A7	1
1	403298125	putative E3 ubiquitin-protein ligase UBR7	1
1	403298180	tetratricopeptide repeat protein 7B	1
1	403298208	probable E3 ubiquitin-protein ligase HERC1	1
1	403298222	ras-related protein Rab-8B isoform 1	1
1	403298269	talin-2	1
1	403298321	60S ribosomal protein L6-like isoform 1	1
1	403298325	60S ribosomal protein L6-like isoform 3	1
1	403298337	MTSS1-like protein	1
1	403298374	AP-1 complex subunit gamma-1 isoform 1	1
1	403298388	dihydroorotate dehydrogenase (quinone), mitochondrial	1
1	403298390	pre-mRNA-splicing factor ATP-dependent RNA helicase PRP16	1
1	403298394	haptoglobin	1
1	403298406	zinc finger homeobox protein 3 isoform 1	1
1	403298455	Golgi apparatus protein 1	1
1	403298461	hydrocephalus-inducing protein homolog	1
1	403298562	serine/threonine-protein kinase N3	1
1	403298566	protein SET	1
1	403298577	transducin-like enhancer protein 4-like	1
1	403298586	putative uncharacterized protein C9orf106 homolog	1
1	403298624	aldehyde dehydrogenase X, mitochondrial	1
1	403298652	ankyrin repeat and SAM domain-containing protein 6	1
1	403298670	endoplasmic reticulum resident protein 44	1
1	403298697	39S ribosomal protein L50, mitochondrial	1
1	403298713	maternal embryonic leucine zipper kinase	1
1	403298735	nuclear receptor subfamily 4 group A member 3	1
1	403298785	uncharacterized protein LOC101027509	1
1	403298815	armadillo repeat-containing X-linked protein 2 isoform 3	1
1	403298877	phosphoprotein associated with glycosphingolipid-enriched microdomains 1	2
1	403298968	succinyl-CoA ligase [GDP-forming] subunit beta, mitochondrial	1
1	403298976	calcium-dependent secretion activator 1	1
1	403298980	receptor-type tyrosine-protein phosphatase gamma	1
1	403298990	poliovirus receptor-related protein 2	1
1	403299071	serine/threonine-protein phosphatase 5 isoform 2	1
1	403299112	C5a anaphylatoxin chemotactic receptor	1
1	403299124	alpha-soluble NSF attachment protein	1
1	403299147	coiled-coil domain-containing protein 114	1
1	403299181	ribosomal protein L18-like	1
1	403299202	trans-1,2-dihydrobenzene-1,2-diol dehydrogenase	1
1	403299338	myosin-binding protein C, fast-type	1
1	403299386	kallikrein-12	1
1	403299480	pleckstrin homology domain-containing family A member 4	1
1	403299506	AP-2 complex subunit alpha-2	1
1	403299560	cyclic nucleotide-gated cation channel beta-3	1
1	403299568	40S ribosomal protein S10-like	2
1	403299604	leucine-rich repeat and coiled-coil domain-containing protein 1	1
1	403299616	oxidative stress-induced growth inhibitor 2, partial	1
1	403299688	synemin	1
1	403299716	outer dense fiber protein 2 isoform 4	1
1	403299729	golgin subfamily A member 2 isoform 2	1
1	403299912	probable G-protein coupled receptor 144	1
1	403299914	DENN domain-containing protein 1A	1
1	403299959	transcription elongation factor B polypeptide 1	1
1	403299963	transcription elongation factor B polypeptide 1	1
1	403299967	lymphocyte antigen 96	1
1	403299979	zinc finger homeobox protein 4	1
1	403300003	CUB and sushi domain-containing protein 1	1
1	403300112	cerebellar degeneration-related antigen 1	1
1	403300126	RNA binding motif protein, X-linked-like-1-like, partial	1
1	403300193	solute carrier family 35 member F3	1
1	403300205	nuclear pore complex protein Nup133	1
1	403300250	signal transducer and activator of transcription 1-alpha/beta	1
1	403300334	transcription elongation factor A protein 1	1
1	403300347	RB1-inducible coiled-coil protein 1	1
1	403300458	peptidyl-prolyl cis-trans isomerase B	1
1	403300499	immunoglobulin superfamily DCC subclass member 4	1
1	403300525	zinc finger protein 182-like	1
1	403300527	oligophrenin-1-like isoform 2	1
1	403300571	APC membrane recruitment protein 1	1
1	403300596	prothymosin alpha-like	1
1	403300640	amyloid beta A4 precursor protein-binding family B member 2 isoform 1	1
1	403300655	NEDD4-binding protein 2 isoform 1	1
1	403300662	ubiquitin-conjugating enzyme E2 K isoform 2	2
1	403300687	beta-defensin 118	1
1	403300715	casein kinase II subunit alpha	1
1	403300756	NSFL1 cofactor p47 isoform 1	1
1	403300787	transmembrane channel-like protein 2	1
1	403300929	pantothenate kinase 2, mitochondrial	1
1	403301039	glutamine-dependent NAD(+) synthetase	1
1	403301046	liprin-alpha-1	1
1	403301175	uncharacterized protein LOC101040854	1
1	403301178	src substrate cortactin	1
1	403301201	uncharacterized protein LOC101046599	1
1	403301206	NADH dehydrogenase [ubiquinone] flavoprotein 1, mitochondrial, partial	1
1	403301216	lysine-specific demethylase 2A	1
1	403301259	inositol 1,4,5-trisphosphate receptor-interacting protein-like 1 isoform 1	1
1	403301296	ankyrin repeat domain-containing protein 39	1
1	403301298	semaphorin-4C	1
1	403301364	glycerol-3-phosphate acyltransferase 2, mitochondrial	1
1	403301452	rab-like protein 1	1
1	403301454	14 kDa phosphohistidine phosphatase	1
1	403301485	calmodulin-regulated spectrin-associated protein 1 isoform 1	1
1	403301595	ubiquitin-associated domain-containing protein 1	1
1	403301599	epididymal-specific lipocalin-9	1
1	403301603	uncharacterized protein LOC101034921	1
1	403301630	6-phosphofructokinase, muscle type isoform 1	1
1	403301679	sodium-coupled neutral amino acid transporter 4 isoform 1	1
1	403301714	twinfilin-1 isoform 1	1
1	403301735	A disintegrin and metalloproteinase with thrombospondin motifs 20, partial	1
1	403301747	protocadherin Fat 3 isoform 1	1
1	403301784	centrosomal protein KIAA1731 homolog	1
1	403301818	serine/threonine-protein phosphatase PP1-beta catalytic subunit	1
1	403301970	transcription factor 23	1
1	403301980	60S ribosomal protein L30-like	1
1	403301999	tryptophan--tRNA ligase, cytoplasmic isoform 2	1
1	403302022	unconventional myosin-Vc	1
1	403302032	protein FAM214A isoform 1	1
1	403302055	guanine nucleotide-binding protein subunit beta-5	1
1	403302094	importin subunit alpha-1	1
1	403302134	zinc finger protein 148 isoform 1	1
1	403302168	coiled-coil domain-containing protein 14-like	1
1	403302189	serine/threonine-protein kinase N1	1
1	403302254	growth arrest and DNA damage-inducible proteins-interacting protein 1	1
1	403302295	zinc finger protein 490	1
1	403302322	zinc finger protein 441 isoform 2	1
1	403302427	uncharacterized protein C19orf57 homolog	1
1	403302442	uncharacterized protein LOC101048931	1
1	403302444	zinc finger protein 91-like	1
1	403302503	uncharacterized protein LOC101033032	1
1	403302524	ubiquitin-associated protein 2-like	1
1	403302528	uncharacterized protein C1orf43 homolog isoform 2	1
1	403302550	ras-related protein Rab-13	1
1	403302591	protein S100-A4 isoform 1	1
1	403302593	protein S100-A4 isoform 2	1
1	403302690	DNA-binding protein RFX5 isoform 1	1
1	403302795	histone H2B type 2-F-like isoform 1	1
1	403302823	uncharacterized protein LOC101032389	1
1	403302836	uncharacterized protein LOC101036182	2
1	403302840	putative PIP5K1A and PSMD4-like protein-like	1
1	403302851	aryl hydrocarbon receptor nuclear translocator	1
1	403302861	OTU domain-containing protein 7B	1
1	403302917	cleavage and polyadenylation specificity factor subunit 1	1
1	403302924	40S ribosomal protein S18-like isoform 1	4
1	403302952	uncharacterized protein LOC101031333	2
1	403302954	GDP-L-fucose synthase	1
1	403302984	G-protein coupled receptor 20 isoform 1	1
1	403302995	60S ribosomal protein L8	1
1	403303028	5-oxoprolinase	1
1	403303034	epiplakin, partial	1
1	403303050	rhophilin-1	1
1	403303067	brain-specific angiogenesis inhibitor 1-like	1
1	403303118	dynein heavy chain 6, axonemal	1
1	403303134	pulmonary surfactant-associated protein B	1
1	403303186	von Willebrand factor	1
1	403303235	zinc finger protein 384	1
1	403303237	chromodomain-helicase-DNA-binding protein 4	1
1	403303371	epidermal growth factor receptor substrate 15-like 1	1
1	403303373	calcium homeostasis endoplasmic reticulum protein isoform 1	1
1	403303449	ubiquitin-60S ribosomal protein L40	5
1	403303453	cartilage oligomeric matrix protein isoform 1	1
1	403303501	probable cation-transporting ATPase 13A1	1
1	403303542	unconventional myosin-IXb	1
1	403303592	transmembrane protein 59-like	1
1	403303606	hyaluronan and proteoglycan link protein 4	1
1	403303642	voltage-dependent anion-selective channel protein 3 isoform 2	1
1	403303708	signal peptide peptidase-like 2C	1
1	403303756	ATP-dependent RNA helicase DDX42 isoform 1	1
1	403303766	SWI/SNF-related matrix-associated actin-dependent regulator of chromatin subfamily D member 2	1
1	403303804	centrosomal protein of 95 kDa	2
1	403303810	probable ATP-dependent RNA helicase DDX5 isoform 3	2
1	403303819	40S ribosomal protein SA-like	2
[truncated: 146 more rows]

## Sheet: Maxquant
Accession	Protein Description	Avg. Xrep
403253974	ubiquitin-conjugating enzyme E2 L3-like	1
403254127	cytochrome c-like	1
403254176	olfactory receptor 481-like	1
403254227	AMP deaminase 3 isoform 3	1
403254300	coatomer subunit beta isoform 1	1
403254367	L-lactate dehydrogenase A chain+B94	1
403254384	immunoglobulin superfamily member 22	1
403254455	peptidyl-prolyl cis-trans isomerase A-like isoform 1	1
403254548	catalase	1
403254569	CD44 antigen	1
403254687	zinc finger protein 408 isoform 1	1
403254695	prothrombin isoform 1	1
403254832	large neutral amino acids transporter small subunit 3	1
403255088	elongation factor 1-gamma	1
403255280	oral-facial-digital syndrome 1 protein isoform 1	1
403255365	high mobility group protein B1-like, partial	1
403255416	uncharacterized protein LOC101039636	1
403255639	neuroblast differentiation-associated protein AHNAK	1
403255664	ADP/ATP translocase 3	1
403255709	protein SET-like	1
403255848	core histone macro-H2A.1-like	1
403255885	voltage-dependent anion-selective channel protein 1	1
403255891	heat shock 70 kDa protein 4	1
403256025	RNA-binding motif protein, X chromosome-like	1
403256208	calpastatin isoform 2	1
403256221	glutaredoxin-1	1
403256341	40S ribosomal protein S23	1
403256628	isochorismatase domain-containing protein 1	1
403256636	lamin-B1	1
403256754	myotrophin	1
403256779	bisphosphoglycerate mutase	1
403256938	ankyrin repeat domain-containing protein 7	1
403257089	60S ribosomal protein L26-like	1
403257405	14-3-3 protein sigma	1
403257409	nuclear migration protein nudC	1
403257493	filamin-C	1
403257698	far upstream element-binding protein 1 isoform 2	1
403258111	60S ribosomal protein L11-like	1
403258137	UMP-CMP kinase isoform 1	1
403258201	isocitrate dehydrogenase [NADP], mitochondrial isoform 2	1
403258454	low-density lipoprotein receptor-related protein 8	1
403258531	40S ribosomal protein SA-like	1
403258685	heterogeneous nuclear ribonucleoprotein A3	1
403258841	bile salt export pump	1
403259169	low-density lipoprotein receptor-related protein 2	1
403259194	nebulin	1
403259245	leucine-rich repeat-containing protein 27 isoform 1	1
403259291	peptidyl-prolyl cis-trans isomerase A-like	1
403259324	ornithine aminotransferase, mitochondrial	1
403259393	eukaryotic translation initiation factor 3 subunit A	1
403259399	thioredoxin-dependent peroxide reductase, mitochondrial	1
403259540	xaa-Pro aminopeptidase 1	1
403259549	glutathione S-transferase omega-1 isoform 1	1
403259801	phosphoglycerate mutase 1	1
403259807	ferritin heavy chain-like	1
403259929	tropomyosin alpha-3 chain-like	1
403259932	60S ribosomal protein L19-like isoform 1	1
403260168	arsenite methyltransferase	1
403260369	actin, gamma-enteric smooth muscle	1
403260458	V-type proton ATPase subunit B, kidney isoform	1
403260468	beta-adducin isoform 1	1
403260495	poly(rC)-binding protein 1	1
403260551	60S ribosomal protein L6-like	1
403260559	actin-related protein 2	1
403260564	ras-related protein Rab-1A	1
403260589	malate dehydrogenase, cytoplasmic	1
403260609	T-complex protein 1 subunit delta isoform 1	1
403260616	40S ribosomal protein S2-like isoform 1	1
403260666	spectrin beta chain, brain 1-like	1
403260745	GRIP and coiled-coil domain-containing protein 2 isoform 1	1
403260763	60S ribosomal protein L26-like	1
403260765	polyubiquitin-B-like	1
403260784	28S ribosomal protein S9, mitochondrial	1
403260836	coactosin-like protein, partial	1
403261564	tapasin	1
403261570	40S ribosomal protein S18	1
403261583	protein CutA isoform 1	1
403261702	serine/arginine-rich splicing factor 3	1
403261934	heat shock cognate protein HSP 90-beta-like, partial	1
403261968	diphosphoinositol polyphosphate phosphohydrolase 1	1
403262049	ubiquilin-3	1
403262065	hemoglobin subunit epsilon	1
403262067	hemoglobin subunit beta	1
403262069	hemoglobin subunit delta	1
403262289	40S ribosomal protein S3 isoform 1	1
403262505	heat shock cognate 71 kDa protein	1
403262584	porphobilinogen deaminase isoform 1	1
403262701	apolipoprotein A-I isoform 1	1
403262853	radixin	1
403262963	40S ribosomal protein S3a-like isoform 1	1
403263183	40S ribosomal protein S25	1
403263198	T-cell surface glycoprotein CD3 epsilon chain	1
403263208	serine/threonine-protein kinase SIK3	1
403263261	peptidyl-prolyl cis-trans isomerase A-like isoform 1	1
403263301	60S ribosomal protein L7a	1
403263352	heterogeneous nuclear ribonucleoprotein D0 isoform 2	1
403263495	alpha-synuclein isoform 5	1
403263542	probable ubiquitin carboxyl-terminal hydrolase FAF-X isoform 2	1
403263845	uncharacterized protein LOC101053493	1
403263938	proteasome subunit alpha type-6-like isoform 1	1
403264120	proteasome activator complex subunit 1	1
403264198	protein arginine N-methyltransferase 5 isoform 1	1
403264257	heterogeneous nuclear ribonucleoprotein C-like 1-like isoform 3	1
403264400	c-1-tetrahydrofolate synthase, cytoplasmic	1
403264413	spectrin beta chain, erythrocyte	1
403264672	dihydrolipoyllysine-residue succinyltransferase component of 2-oxoglutarate dehydrogenase complex, mitochondrial	1
403264904	uncharacterized protein LOC101041609	1
403265000	ATP synthase subunit alpha, mitochondrial isoform 1	1
403265160	proteasome subunit alpha type-7-like isoform 3	1
403265212	ubiquitin carboxyl-terminal hydrolase 14 isoform 1	1
403265255	myosin regulatory light polypeptide 9-like isoform 3	1
403265302	T-complex protein 1 subunit beta-like	1
403265441	laminin subunit alpha-3	1
403265503	potassium voltage-gated channel subfamily H member 8	1
403265826	ras-related protein Rab-6B isoform 1	1
403265830	serotransferrin isoform 1	1
403266017	ceruloplasmin-like	1
403266081	ras-related protein Rab-14	1
403266091	26S proteasome non-ATPase regulatory subunit 5 isoform 1	1
403266127	V-type proton ATPase subunit G 1	1
403266151	delta-aminolevulinic acid dehydratase	1
403266218	thioredoxin isoform 1	1
403266313	influenza virus NS1A-binding protein	1
403266627	ATP-dependent RNA helicase A	1
403266670	peroxiredoxin-6	1
403266710	arf-GAP domain and FG repeat-containing protein 1	1
403266781	desmin	1
403266892	actin-related protein 2/3 complex subunit 2 isoform 1	1
403266933	X-ray repair cross-complementing protein 5	1
403266946	bifunctional purine biosynthesis protein PURH isoform 1	1
403267187	SPATS2-like protein isoform 3	1
403267213	60 kDa heat shock protein, mitochondrial isoform 1	1
403267274	tubulin alpha-4A chain	1
403267372	transportin-1 isoform 1	1
403267534	beta-actin-like protein 2-like	1
403267688	complement component C7	1
403268090	mitogen-activated protein kinase 4	1
403268100	3-ketoacyl-CoA thiolase, mitochondrial	1
403268105	60S ribosomal protein L17	1
403268234	ruvB-like 1 isoform 1	1
403268248	ras-related protein Rab-7a	1
403268536	histone-lysine N-methyltransferase SETD2	1
403268562	microtubule-associated protein 4	1
403268595	cytochrome b-c1 complex subunit 1, mitochondrial-like	1
403268633	elongation factor 1-alpha 1	1
403268662	protein FAM135A isoform 1	1
403268696	14-3-3 protein theta-like	1
403268767	glutathione S-transferase A4-like	1
403268775	antigen peptide transporter 1	1
403268779	proteasome subunit beta type-8 isoform 1	1
403268805	histone H1x-like, partial	1
403269084	cullin-associated NEDD8-dissociated protein 1-like	1
403269140	L-lactate dehydrogenase B chain	1
403269439	methionine--tRNA ligase, cytoplasmic	1
403269506	kinesin-like protein KIF21A	1
403269554	calmodulin isoform 1	1
403269672	serine/arginine-rich splicing factor 7 isoform 1	1
403269838	costars family protein ABRACL	1
403270344	actin-related protein 2/3 complex subunit 4 isoform 3	1
403270545	suppressor of G2 allele of SKP1 homolog isoform 2	1
403270695	14-3-3 protein beta/alpha-B-like	1
403270715	histone H1.3-like	1
403270730	histone H1.4-like	1
403270744	histone H1.2-like	1
403270752	histone H2B type 1-B-like	1
403271001	tubulin beta-2A chain-like	1
403271017	serpin B9	1
403271047	histone H2A type 1-like	1
403271228	anaphase-promoting complex subunit 4	1
403271458	interferon-induced GTP-binding protein Mx1	1
403271545	carbonyl reductase [NADPH] 1	1
403271576	ATP synthase subunit O, mitochondrial	1
403271624	superoxide dismutase [Cu-Zn]	1
403271668	T-complex protein 1 subunit theta isoform 1	1
403271739	ADP/ATP translocase 4	1
403272179	ubiquitin-conjugating enzyme E2 N-like	1
403272224	alpha-enolase isoform 1	1
403272236	peptidyl-prolyl cis-trans isomerase D	1
403272418	glycophorin-A	1
403272423	SWI/SNF-related matrix-associated actin-dependent regulator of chromatin subfamily A member 5	1
403272475	6-phosphogluconate dehydrogenase, decarboxylating	1
403272691	40S ribosomal protein S6	1
403272869	importin-5	1
403272916	tripeptidyl-peptidase 2	1
403273166	hemoglobin subunit alpha-1-like	1
403273327	60S ribosomal protein L3-like	1
403273808	core histone macro-H2A.2-like	1
403273867	heterogeneous nuclear ribonucleoprotein H3 isoform 1	1
403274088	lamin-B2	1
403274126	ankyrin-3	1
403274464	erythrocyte membrane protein band 4.2 isoform 2	1
403274563	annexin A2 isoform 1	1
403274646	protein disulfide-isomerase A3	1
403274674	AP-1 complex subunit beta-1 isoform 1	1
403274773	clathrin heavy chain 1	1
403274874	very long-chain specific acyl-CoA dehydrogenase, mitochondrial isoform 1	1
403274950	sentrin-specific protease 3	1
403275062	myosin-10 isoform 3	1
403275246	dual specificity mitogen-activated protein kinase kinase 3	1
403275279	14-3-3 protein epsilon	1
403275526	ankyrin-2	1
403275583	60S ribosomal protein L31-like	1
403275850	leukotriene A-4 hydrolase	1
403275929	endoplasmin	1
403276022	pyruvate kinase isozymes M1/M2 isoform 2	1
403276024	pyruvate kinase isozymes M1/M2 isoform 3	1
403276785	heterogeneous nuclear ribonucleoprotein F isoform 1	1
403276810	alpha-hemoglobin-stabilizing protein	1
403276866	uncharacterized protein LOC101042594	1
403276914	dCTP pyrophosphatase 1 isoform 1	1
403277003	fructose-bisphosphate aldolase A isoform 4	1
403277017	coronin-1A isoform 1	1
403277103	cytochrome b-c1 complex subunit 2, mitochondrial-like	1
403277252	elongation factor Tu, mitochondrial	1
403277265	glutamate dehydrogenase 1, mitochondrial, partial	1
403277480	bifunctional glutamate/proline--tRNA ligase isoform 2	1
403277744	rab3 GTPase-activating protein non-catalytic subunit	1
403277797	proteasome subunit alpha type-3 isoform 1	1
403278020	26S protease regulatory subunit 10B	1
403278071	nucleolin-like	1
403278155	vimentin	1
403278437	proteasome subunit alpha type-2	1
403278600	histone H2A.V-like	1
403278922	transferrin receptor protein 1	1
403279141	septin-6 isoform 1	1
403279403	LIM and SH3 domain protein 1	1
403279422	puromycin-sensitive aminopeptidase isoform 1	1
403279429	importin subunit beta-1 isoform 2	1
403279661	nucleoside diphosphate kinase B	1
403279712	serine/arginine-rich splicing factor 1	1
403279715	dynein light chain 2, cytoplasmic	1
403279786	profilin-1	1
403279806	proteasome subunit beta type-6 isoform 1	1
403279865	vitronectin	1
403279997	uncharacterized protein LOC101040688	1
403280067	complement component 1 Q subcomponent-binding protein, mitochondrial	1
403280374	rho GDP-dissociation inhibitor 1 isoform 1	1
403280419	eukaryotic initiation factor 4A-III	1
403280504	ubiquitin-conjugating enzyme E2 O	1
403280528	39S ribosomal protein L38, mitochondrial	1
403280585	ATP synthase subunit d, mitochondrial isoform 1	1
403280729	forkhead box protein K2	1
403281161	RNA-binding protein 12	1
403281186	eukaryotic translation initiation factor 6 isoform 1	1
403281226	adenosylhomocysteinase isoform 1	1
403281345	serum albumin	1
403281529	translational activator GCN1	1
403281645	aldehyde dehydrogenase, mitochondrial isoform 1	1
403281827	60S acidic ribosomal protein P0	1
403281834	phosphatidylethanolamine-binding protein 1	1
403281895	acetyl-CoA carboxylase 2	1
403282009	60S acidic ribosomal protein P0-like	1
403282075	syntaxin-7	1
403282096	40S ribosomal protein S12	1
403282203	T-complex protein 1 subunit epsilon	1
403282321	exportin-2 isoform 1	1
403282533	proteasome subunit alpha type-7	1
403282697	elongation factor 1-alpha 2	1
403282935	trinucleotide repeat-containing gene 6B protein isoform 1	1
403282980	SUN domain-containing protein 2	1
403283024	histone H1.0-like	1
403283045	ras-related C3 botulinum toxin substrate 2	1
403283098	myosin-9	1
403283210	X-ray repair cross-complementing protein 6	1
403283212	aconitate hydratase, mitochondrial	1
403283220	probable Xaa-Pro aminopeptidase 3	1
403283222	hsc70-interacting protein	1
403283238	DNA dC-_dU-editing enzyme APOBEC-3G-like	1
403283316	26S proteasome non-ATPase regulatory subunit 11	1
403283349	T-complex protein 1 subunit zeta-2 isoform 1	1
403284006	glutamate--cysteine ligase regulatory subunit	1
403284030	cysteine-rich protein 1	1
403284158	serine--tRNA ligase, cytoplasmic	1
403284168	proteasome subunit alpha type-5	1
403284310	F-actin-capping protein subunit alpha-1	1
403284598	multifunctional protein ADE2 isoform 1	1
403284823	protein FAM49B isoform 1	1
403284970	ezrin	1
403285199	ADP/ATP translocase 1	1
403285306	matrin-3 isoform 1	1
403285333	stress-70 protein, mitochondrial	1
403285553	annexin A6 isoform 1	1
403285600	la-related protein 1 isoform 1	1
403285754	malate dehydrogenase, mitochondrial	1
403285760	14-3-3 protein gamma	1
403286230	plastin-2 isoform 1	1
403286372	heat shock protein HSP 90-beta-like isoform 1	1
403286483	poly(rC)-binding protein 1-like isoform 1	1
403286685	rho GDP-dissociation inhibitor 2 isoform 1	1
403286843	alpha-adducin isoform 2	1
403286956	WD repeat-containing protein 1	1
403287000	LETM1 and EF-hand domain-containing protein 1, mitochondrial	1
403287204	actin, cytoplasmic 1	1
403287428	cell division control protein 42 homolog	1
403287522	F-actin-capping protein subunit beta isoform 1	1
403287667	heterochromatin protein 1-binding protein 3	1
403287718	protein DDI1 homolog 2	1
403287831	dipeptidyl peptidase 1	1
403287971	heterogeneous nuclear ribonucleoproteins A2/B1 isoform 2	1
403288056	protein FAM188B	1
403288083	dynein heavy chain 11, axonemal	1
403288124	ATP-dependent RNA helicase DDX1	1
403288246	trifunctional enzyme subunit alpha, mitochondrial	1
403288344	heterogeneous nuclear ribonucleoprotein U	1
403288386	fumarate hydratase, mitochondrial	1
403288506	ryanodine receptor 2	1
403288508	alpha-actinin-2	1
403288628	V-type proton ATPase catalytic subunit A isoform 1	1
403288679	transgelin-3 isoform 1	1
403288713	casein kinase II subunit alpha-like	1
403288953	V-type proton ATPase subunit B, brain isoform	1
403289010	annexin A1	1
403289299	actin, alpha cardiac muscle 1	1
403289391	purine nucleoside phosphorylase	1
403289466	plastin-3 isoform 1	1
403289917	60S ribosomal protein L15-like	1
403290028	heterogeneous nuclear ribonucleoprotein A/B	1
403290170	nucleophosmin isoform 1	1
403290297	activated RNA polymerase II transcriptional coactivator p15	1
403290732	14-3-3 protein beta/alpha	1
403291047	transketolase	1
403291199	guanine nucleotide-binding protein G(i) subunit alpha-2 isoform 1	1
403291258	glutathione peroxidase 1	1
403291397	phosphatidylinositol 3,4,5-trisphosphate 5-phosphatase 1 isoform 1	1
403291609	SH3 domain-binding glutamic acid-rich-like protein isoform 1	1
403291654	phosphoglycerate kinase 1	1
403291932	solute carrier family 2, facilitated glucose transporter member 1	1
403292029	adenylyl cyclase-associated protein 1	1
403292111	40S ribosomal protein S8	1
403292200	GTP-binding nuclear protein Ran	1
403292317	exportin-7	1
403292351	DBIRD complex subunit KIAA1967 homolog isoform 1	1
403292390	disintegrin and metalloproteinase domain-containing protein 7	1
403292394	neurofilament light polypeptide	1
403292441	clusterin	1
403292443	coiled-coil domain-containing protein 25 isoform 1	1
403292482	dematin	1
403292616	vacuolar protein sorting-associated protein 35	1
403292722	glucose-6-phosphate isomerase	1
403292972	alpha-actinin-4	1
403293111	proteasome subunit beta type-2 isoform 1	1
403293293	protein 4.1 isoform 1	1
403293319	splicing factor, proline- and glutamine-rich-like	1
403293515	EGF-containing fibulin-like extracellular matrix protein 2	1
403293589	alpha-actinin-3	1
403293591	dipeptidyl peptidase 3 isoform 1	1
403293675	pyruvate kinase isozymes R/L isoform 1	1
403293940	transgelin-2 isoform 1	1
403294115	stress-induced-phosphoprotein 1	1
403294125	peroxiredoxin-5, mitochondrial	1
403294184	T-complex protein 1 subunit gamma	1
403294193	spectrin alpha chain, erythrocyte	1
403294199	uncharacterized protein LOC101044662	1
403294317	glutathione reductase, mitochondrial isoform 1	1
403294656	receptor-type tyrosine-protein phosphatase C isoform 1	1
403294777	transmembrane protein 183A	1
403295087	oxysterol-binding protein 2 isoform 1	1
403295208	elongation factor 1-alpha 1-like isoform 1	1
403295268	macrophage migration inhibitory factor	1
403295709	high mobility group protein B2	1
403295847	translationally-controlled tumor protein-like	1
403295889	elongation factor 2	1
403296075	ELAV-like protein 1	1
403296087	heterogeneous nuclear ribonucleoprotein M	1
403296279	complement C3	1
403296341	hsp90 co-chaperone Cdc37	1
403296395	rab GDP dissociation inhibitor beta isoform 1	1
403296423	aldo-keto reductase family 1 member C1 homolog	1
403296537	ADP-ribosylation factor 3 isoform 1	1
403296559	peripherin	1
403296565	tubulin alpha-1C chain	1
403296711	keratin, type II cytoskeletal 71	1
403296725	keratin, type II cytoskeletal 1	1
403296804	poly(rC)-binding protein 2	1
403296937	diacylglycerol kinase alpha isoform 4	1
403296959	proliferation-associated protein 2G4	1
403296965	myosin light polypeptide 6 isoform 1	1
403297087	extended synaptotagmin-1	1
403297103	ATP synthase subunit beta, mitochondrial	1
403297233	low molecular weight phosphotyrosine protein phosphatase isoform 1	1
403297235	low molecular weight phosphotyrosine protein phosphatase isoform 2	1
403297256	40S ribosomal protein S7	1
403297375	ubiquitin-like modifier-activating enzyme 1 isoform 1	1
403297615	protein DJ-1 isoform 1	1
403297989	voltage-dependent anion-selective channel protein 2 isoform 1	1
403297991	voltage-dependent anion-selective channel protein 2 isoform 2	1
403298180	tetratricopeptide repeat protein 7B	1
403298226	tropomyosin alpha-4 chain isoform 1	1
403298315	alanine--tRNA ligase, cytoplasmic	1
403298335	protein VAC14 homolog	1
403298566	protein SET	1
403298630	tropomodulin-1	1
403298632	thiosulfate sulfurtransferase/rhodanese-like domain-containing protein 2	1
403298785	uncharacterized protein LOC101027509	1
403298789	heterogeneous nuclear ribonucleoprotein H2 isoform 1	1
403298954	26S proteasome non-ATPase regulatory subunit 6	1
403299204	ferritin light chain	1
403299206	apoptosis regulator BAX	1
403299394	apolipoprotein E	1
403299538	carbonic anhydrase 1 isoform 1	1
403299544	carbonic anhydrase 2	1
403299826	78 kDa glucose-regulated protein	1
403299948	14-3-3 protein zeta/delta-like isoform 1	1
403300203	actin, alpha skeletal muscle	1
403300207	ATP-binding cassette sub-family B member 10, mitochondrial	1
403300479	high mobility group protein B1-like	1
403300499	immunoglobulin superfamily DCC subclass member 4	1
403300546	moesin	1
403300596	prothymosin alpha-like	1
403300655	NEDD4-binding protein 2 isoform 1	1
403300660	ubiquitin-conjugating enzyme E2 K isoform 1	1
403300735	proteasome inhibitor PI31 subunit isoform 1	1
403300789	nucleolar protein 56	1
403300830	40S ribosomal protein SA-like isoform 1	1
403300845	UPF0687 protein C20orf27 homolog isoform 1	1
403300938	heterogeneous nuclear ribonucleoprotein K isoform 1	1
403301105	glutathione S-transferase P	1
403301300	cytochrome c oxidase subunit 5B, mitochondrial-like	1
403301454	14 kDa phosphohistidine phosphatase	1
403301550	tubulin beta-4B chain	1
403301570	endothelial differentiation-related factor 1	1
403301997	tryptophan--tRNA ligase, cytoplasmic isoform 1	1
403302051	tropomodulin-3	1
403302074	hematopoietic lineage cell-specific protein	1
403302244	UV excision repair protein RAD23 homolog A isoform 1	1
403302262	peroxiredoxin-2	1
403302565	interleukin enhancer-binding factor 2	1
403302644	40S ribosomal protein S4, X isoform-like isoform 1	1
403302671	40S ribosomal protein S16-like isoform 1	1
403302781	histone H2A type 2-B-like	1
403302795	histone H2B type 2-F-like isoform 1	1
403302934	cytochrome c1, heme protein, mitochondrial-like	1
403303083	succinyl-CoA ligase [ADP/GDP-forming] subunit alpha, mitochondrial	1
403303160	glyceraldehyde-3-phosphate dehydrogenase	1
403303596	regulator of nonsense transcripts 1	1
403303658	ankyrin-1	1
403303806	probable ATP-dependent RNA helicase DDX5 isoform 1	1
403304094	coatomer subunit beta' isoform 1	1
403304219	clathrin heavy chain 2	1
403304272	catechol O-methyltransferase	1
403304488	cytosolic 5'-nucleotidase III-like protein	1
403304547	keratin, type I cytoskeletal 28	1
403304602	26S proteasome non-ATPase regulatory subunit 3	1
403304663	ATP-citrate synthase	1
403304913	proteasome subunit alpha type-4	1
403305068	polyadenylate-binding protein 1	1
403305174	non-POU domain-containing octamer-binding protein isoform 1	1
403305233	heterogeneous nuclear ribonucleoprotein L	1
403305253	glia maturation factor gamma	1
403305292	26S protease regulatory subunit 6B isoform 1	1
403305326	flavin reductase (NADPH)	1
403305546	leucine-rich repeat-containing protein 8B	1
403305602	nucleosome assembly protein 1-like 4 isoform 1	1
403305628	60S acidic ribosomal protein P2	1
403305721	transaldolase	1
403306181	coiled-coil domain-containing protein 170	1
403306195	protein-L-isoaspartate(D-aspartate) O-methyltransferase	1
403306203	116 kDa U5 small nuclear ribonucleoprotein component isoform 1	1
403306300	band 3 anion transport protein	1
403306660	talin-1	1
403306707	transitional endoplasmic reticulum ATPase	1
403306853	isocitrate dehydrogenase [NAD] subunit gamma, mitochondrial	1
403306887	methyl-CpG-binding protein 2	1
403306894	filamin-A isoform 1	1
403306920	glucose-6-phosphate 1-dehydrogenase isoform 1	1
403306978	55 kDa erythrocyte membrane protein	1
403306997	calnexin isoform 1	1
403307565	fibrous sheath-interacting protein 2	1
403307567	serine/threonine-protein phosphatase 2A 65 kDa regulatory subunit A alpha isoform isoform 1	1
403307631	zinc finger protein 350	1
403307790	complement C4-A isoform 1	1
403307812	heat shock 70 kDa protein 1-like	1
403307819	valine--tRNA ligase	1
403307827	chloride intracellular channel protein 1 isoform 1	1
403307907	spliceosome RNA helicase DDX39B	1
403308155	uncharacterized protein LOC101029560	1
403308360	ATPase inhibitor, mitochondrial	1
403308453	myosin-11	1
403308488	tubulin beta chain	1
403308670	histone H1.5-like	1
403308699	uncharacterized protein LOC101044508	1
403308988	triosephosphate isomerase	1
403309049	14-3-3 protein eta isoform 1	1
403309092	basigin	1
403309186	glyceraldehyde-3-phosphate dehydrogenase-like	1
403309192	alpha-2-macroglobulin-like, partial	1
403309242	patr class I histocompatibility antigen, A-2 alpha chain-like	1
403309405	prostaglandin E synthase 3-like isoform 1	1
403309466	myosin light polypeptide 6-like, partial	1
403309549	hemoglobin subunit gamma-like, partial	1
PVP01_0000130.1-p1	tryptophan-rich antigen | transcript_product=tryptophan-rich antigen | location=Transfer.PvP01_00_1.final:51962-53190(-) | protein_length=339 | sequence_SO=random_sequence | SO=protein_coding	1
PVP01_0000170.1-p1	tryptophan-rich protein | transcript_product=tryptophan-rich protein | location=Transfer.PvP01_00_1.final:73514-74618(-) | protein_length=313 | sequence_SO=random_sequence | SO=protein_coding;PVP01_0000140.1-p1 | transcript=PVP01_0000140.1 | gene=PVP01_000	1
PVP01_0001440.1-p1	plasmodium exported protein (PHIST), unknown function | transcript_product=Plasmodium exported protein (PHIST), unknown function | location=Transfer.PvP01_00_2.final:263634-265826(+) | protein_length=675 | sequence_SO=random_sequence | SO=protein_coding	1
>PVP01_0003350.1-p1	PIR protein | transcript_product=PIR protein | location=Transfer.PvP01_00_8.final:4631-6614(-) | protein_length=573 | sequence_SO=random_sequence | SO=protein_coding;>PVP01_0010240.1-p1 | transcript=PVP01_0010240.1 | gene=PVP01_0010240 | organism=Plasmodi	1
PVP01_0004210.1-p1	Early transcribed membrane protein | transcript_product=early transcribed membrane protein | location=Transfer.PvP01_00_11.final:9600-10226(+) | protein_length=208 | sequence_SO=random_sequence | SO=protein_coding	1
PVP01_0004250.1-p1	hypothetical protein | transcript_product=hypothetical protein | location=Transfer.PvP01_00_11.final:28583-29023(+) | protein_length=146 | sequence_SO=random_sequence | SO=protein_coding	1
>PVP01_0007720.1-p1	PIR protein | transcript_product=PIR protein | location=Transfer.PvP01_00_30.final:8926-10875(-) | protein_length=522 | sequence_SO=random_sequence | SO=protein_coding;>PVP01_0004920.1-p1 | transcript=PVP01_0004920.1 | gene=PVP01_0004920 | organism=Plasmo	1
>PVP01_0102700.1-p1	conserved Plasmodium protein, unknown function | transcript_product=conserved Plasmodium protein, unknown function | location=PvP01_01_v1:125138-125648(-) | protein_length=110 | sequence_SO=chromosome | SO=protein_coding	1
>PVP01_0103700.1-p1	erythrocyte membrane-associated antigen | transcript_product=erythrocyte membrane-associated antigen | location=PvP01_01_v1:168176-175162(+) | protein_length=2328 | sequence_SO=chromosome | SO=protein_coding	1
>PVP01_0104800.1-p1	E3 ubiquitin-protein ligase | transcript_product=E3 ubiquitin-protein ligase | location=PvP01_01_v1:248713-261673(-) | protein_length=3833 | sequence_SO=chromosome | SO=protein_coding	1
>PVP01_0105900.1-p1	40S ribosomal protein S29 | transcript_product=40S ribosomal protein S29 | location=PvP01_01_v1:317975-318813(-) | protein_length=54 | sequence_SO=chromosome | SO=protein_coding	1
>PVP01_0106200.1-p1	importin-7 | transcript_product=importin-7 | location=PvP01_01_v1:325829-329578(+) | protein_length=1249 | sequence_SO=chromosome | SO=protein_coding	1
>PVP01_0106700.1-p1	conserved Plasmodium protein, unknown function | transcript_product=conserved Plasmodium protein, unknown function | location=PvP01_01_v1:343060-348864(-) | protein_length=1934 | sequence_SO=chromosome | SO=protein_coding	1
>PVP01_0107900.1-p1	E3 ubiquitin-protein ligase | transcript_product=E3 ubiquitin-protein ligase | location=PvP01_01_v1:394691-397972(+) | protein_length=1093 | sequence_SO=chromosome | SO=protein_coding	1
>PVP01_0108700.1-p1	heat shock protein 90 | transcript_product=heat shock protein 90 | location=PvP01_01_v1:420718-423613(+) | protein_length=748 | sequence_SO=chromosome | SO=protein_coding	1
>PVP01_0109100.1-p1	heat shock protein 110 | transcript_product=heat shock protein 110 | location=PvP01_01_v1:435685-438348(+) | protein_length=887 | sequence_SO=chromosome | SO=protein_coding	1
>PVP01_0110100.1-p1	lysophospholipase | transcript_product=lysophospholipase | location=PvP01_01_v1:477837-478991(-) | protein_length=384 | sequence_SO=chromosome | SO=protein_coding	1
>PVP01_0111000.1-p1	60S ribosomal protein L34 | transcript_product=60S ribosomal protein L34 | location=PvP01_01_v1:519629-520629(-) | protein_length=150 | sequence_SO=chromosome | SO=protein_coding	1
>PVP01_0112000.1-p1	coatomer subunit epsilon | transcript_product=coatomer subunit epsilon | location=PvP01_01_v1:550997-552047(-) | protein_length=290 | sequence_SO=chromosome | SO=protein_coding	1
>PVP01_0112100.1-p1	ubiquitin regulatory protein | transcript_product=ubiquitin regulatory protein | location=PvP01_01_v1:553010-554065(-) | protein_length=240 | sequence_SO=chromosome | SO=protein_coding	1
>PVP01_0112200.1-p1	plasmepsin X | transcript_product=plasmepsin X | location=PvP01_01_v1:557180-558817(+) | protein_length=545 | sequence_SO=chromosome | SO=protein_coding	1
>PVP01_0112500.1-p1	tyrosine--tRNA ligase | transcript_product=tyrosine--tRNA ligase | location=PvP01_01_v1:569778-571260(-) | protein_length=385 | sequence_SO=chromosome | SO=protein_coding;REV__>gi|403278542|ref|XP_003930860.1| fidgetin-like protein 1 i	1
>PVP01_0112600.1-p1	26S proteasome regulatory subunit RPN10 | transcript_product=26S proteasome regulatory subunit RPN10 | location=PvP01_01_v1:572569-574248(+) | protein_length=487 | sequence_SO=chromosome | SO=protein_coding	1
>PVP01_0113600.1-p1	vacuolar proton translocating ATPase subunit A | transcript_product=vacuolar proton translocating ATPase subunit A | location=PvP01_01_v1:607892-610837(+) | protein_length=981 | sequence_SO=chromosome | SO=protein_coding	1
>PVP01_0116400.1-p1	proteasome subunit beta type-4 | transcript_product=proteasome subunit beta type-4 | location=PvP01_01_v1:743975-744899(+) | protein_length=256 | sequence_SO=chromosome | SO=protein_coding	1
>PVP01_0116600.1-p1	conserved Plasmodium protein, unknown function | transcript_product=conserved Plasmodium protein, unknown function | location=PvP01_01_v1:748606-756925(-) | protein_length=1668 | sequence_SO=chromosome | SO=protein_coding	1
>PVP01_0118200.1-p1	glutamate dehydrogenase | transcript_product=glutamate dehydrogenase | location=PvP01_01_v1:821394-825137(-) | protein_length=1247 | sequence_SO=chromosome | SO=protein_coding	1
>PVP01_0119200.1-p1	Plasmodium exported protein (PHIST), unknown function | transcript_product=Plasmodium exported protein (PHIST), unknown function | location=PvP01_01_v1:882453-884809(+) | protein_length=710 | sequence_SO=chromosome | SO=protein_coding	1
>PVP01_0119400.1-p1	Plasmodium exported protein, unknown function | transcript_product=Plasmodium exported protein, unknown function | location=PvP01_01_v1:892656-893700(+) | protein_length=298 | sequence_SO=chromosome | SO=protein_coding	1
>PVP01_0201100.1-p1	tryptophan-rich protein | transcript_product=tryptophan-rich protein | location=PvP01_02_v1:52406-53573(+) | protein_length=327 | sequence_SO=chromosome | SO=protein_coding	1
>PVP01_0201200.1-p1	Plasmodium exported protein, unknown function | transcript_product=Plasmodium exported protein, unknown function | location=PvP01_02_v1:58105-59673(+) | protein_length=423 | sequence_SO=chromosome | SO=protein_coding	1
>PVP01_0201500.1-p1	PIR protein | transcript_product=PIR protein | location=PvP01_02_v1:71471-73320(-) | protein_length=491 | sequence_SO=chromosome | SO=protein_coding	1
>PVP01_0201600.1-p1	PIR protein | transcript_product=PIR protein | location=PvP01_02_v1:76202-78180(-) | protein_length=547 | sequence_SO=chromosome | SO=protein_coding	1
>PVP01_0201700.1-p1	PIR protein | transcript_product=PIR protein | location=PvP01_02_v1:82597-84232(-) | protein_length=407 | sequence_SO=chromosome | SO=protein_coding	1
>PVP01_0201800.1-p1	PIR protein | transcript_product=PIR protein | location=PvP01_02_v1:88922-90224(-) | protein_length=379 | sequence_SO=chromosome | SO=protein_coding	1
>PVP01_0201900.1-p1	PIR protein | transcript_product=PIR protein | location=PvP01_02_v1:94373-95363(-) | protein_length=263 | sequence_SO=chromosome | SO=protein_coding	1
>PVP01_0202200.1-p1	tryptophan-rich protein | transcript_product=tryptophan-rich protein | location=PvP01_02_v1:111022-112608(+) | protein_length=480 | sequence_SO=chromosome | SO=protein_coding	1
>PVP01_0203200.1-p1	TatD-like deoxyribonuclease | transcript_product=TatD-like deoxyribonuclease | location=PvP01_02_v1:169122-171605(+) | protein_length=454 | sequence_SO=chromosome | SO=protein_coding	1
>PVP01_0204400.1-p1	chromatin assembly factor 1 protein WD40 domain | transcript_product=chromatin assembly factor 1 protein WD40 domain | location=PvP01_02_v1:208734-210077(+) | protein_length=447 | sequence_SO=chromosome | SO=protein_coding	1
>PVP01_0206700.1-p1	conserved Plasmodium protein, unknown function | transcript_product=conserved Plasmodium protein, unknown function | location=PvP01_02_v1:273829-280107(-) | protein_length=2092 | sequence_SO=chromosome | SO=protein_coding	1
>PVP01_0206900.1-p1	proteasome subunit beta type-3 | transcript_product=proteasome subunit beta type-3 | location=PvP01_02_v1:287397-288625(+) | protein_length=218 | sequence_SO=chromosome | SO=protein_coding	1
>PVP01_0208500.1-p1	calcium-transporting ATPase | transcript_product=calcium-transporting ATPase | location=PvP01_02_v1:352862-356879(+) | protein_length=1189 | sequence_SO=chromosome | SO=protein_coding	1
>PVP01_0211800.1-p1	aspartate--tRNA ligase | transcript_product=aspartate--tRNA ligase | location=PvP01_02_v1:485309-487204(+) | protein_length=631 | sequence_SO=chromosome | SO=protein_coding	1
>PVP01_0213100.1-p1	proteasome subunit alpha type-5 | transcript_product=proteasome subunit alpha type-5 | location=PvP01_02_v1:548876-550047(+) | protein_length=256 | sequence_SO=chromosome | SO=protein_coding	1
>PVP01_0213700.1-p1	eukaryotic translation initiation factor 2 subunit alpha | transcript_product=eukaryotic translation initiation factor 2 subunit alpha | location=PvP01_02_v1:577921-579161(-) | protein_length=329 | sequence_SO=chromosome | SO=protein_c	1
>PVP01_0214900.1-p1	1-cys peroxiredoxin | transcript_product=1-cys peroxiredoxin | location=PvP01_02_v1:633742-634571(+) | protein_length=237 | sequence_SO=chromosome | SO=protein_coding	1
>PVP01_0215600.1-p1	dynein heavy chain | transcript_product=dynein heavy chain | location=PvP01_02_v1:653472-668753(+) | protein_length=5023 | sequence_SO=chromosome | SO=protein_coding	1
>PVP01_0216700.1-p1	Plasmodium exported protein, unknown function | transcript_product=Plasmodium exported protein, unknown function | location=PvP01_02_v1:716489-718256(+) | protein_length=495 | sequence_SO=chromosome | SO=protein_coding	1
>PVP01_0300700.1-p1	Plasmodium exported protein, unknown function | transcript_product=Plasmodium exported protein, unknown function | location=PvP01_03_v1:44811-46092(+) | protein_length=380 | sequence_SO=chromosome | SO=protein_coding	1
>PVP01_0301500.1-p1	Plasmodium exported protein, unknown function | transcript_product=Plasmodium exported protein, unknown function | location=PvP01_03_v1:84678-85456(+) | protein_length=220 | sequence_SO=chromosome | SO=protein_coding	1
>PVP01_0305500.1-p1	V-type proton ATPase subunit B | transcript_product=V-type proton ATPase subunit B | location=PvP01_03_v1:290919-292647(-) | protein_length=494 | sequence_SO=chromosome | SO=protein_coding	1
>PVP01_0305600.1-p1	sexual stage antigen s16 | transcript_product=sexual stage antigen s16 | location=PvP01_03_v1:295918-296340(+) | protein_length=140 | sequence_SO=chromosome | SO=protein_coding	1
>PVP01_0305700.1-p1	cytosolic glyoxalase II | transcript_product=cytosolic glyoxalase II | location=PvP01_03_v1:297922-300043(+) | protein_length=263 | sequence_SO=chromosome | SO=protein_coding	1
>PVP01_0311300.1-p1	DNA polymerase alpha catalytic subunit A | transcript_product=DNA polymerase alpha catalytic subunit A | location=PvP01_03_v1:504014-509809(-) | protein_length=1740 | sequence_SO=chromosome | SO=protein_coding	1
>PVP01_0312100.1-p1	conserved Plasmodium protein, unknown function | transcript_product=conserved Plasmodium protein, unknown function | location=PvP01_03_v1:533913-535343(+) | protein_length=477 | sequence_SO=chromosome | SO=protein_coding	1
>PVP01_0312600.1-p1	eukaryotic translation initiation factor 3 subunit I | transcript_product=eukaryotic translation initiation factor 3 subunit I | location=PvP01_03_v1:546721-548166(-) | protein_length=327 | sequence_SO=chromosome | SO=protein_coding	1
>PVP01_0313500.1-p1	serine--tRNA ligase | transcript_product=serine--tRNA ligase | location=PvP01_03_v1:582157-584055(-) | protein_length=632 | sequence_SO=chromosome | SO=protein_coding	1
>PVP01_0315300.1-p1	60S ribosomal protein L11a | transcript_product=60S ribosomal protein L11a | location=PvP01_03_v1:682398-683092(-) | protein_length=173 | sequence_SO=chromosome | SO=protein_coding	1
>PVP01_0315400.1-p1	40S ribosomal protein S10 | transcript_product=40S ribosomal protein S10 | location=PvP01_03_v1:685134-685867(+) | protein_length=136 | sequence_SO=chromosome | SO=protein_coding	1
>PVP01_0316800.1-p1	conserved Plasmodium protein, unknown function | transcript_product=conserved Plasmodium protein, unknown function | location=PvP01_03_v1:733823-734539(+) | protein_length=238 | sequence_SO=chromosome | SO=protein_coding	1
>PVP01_0317100.1-p1	conserved Plasmodium protein, unknown function | transcript_product=conserved Plasmodium protein, unknown function | location=PvP01_03_v1:743033-744531(+) | protein_length=220 | sequence_SO=chromosome | SO=protein_coding	1
>PVP01_0317300.1-p1	40S ribosomal protein S5 | transcript_product=40S ribosomal protein S5 | location=PvP01_03_v1:747384-748174(-) | protein_length=195 | sequence_SO=chromosome | SO=protein_coding	1
>PVP01_0317400.1-p1	secreted ookinete protein | transcript_product=secreted ookinete protein | location=PvP01_03_v1:751249-752679(+) | protein_length=476 | sequence_SO=chromosome | SO=protein_coding	1
>PVP01_0318900.1-p1	conserved Plasmodium protein, unknown function | transcript_product=conserved Plasmodium protein, unknown function | location=PvP01_03_v1:786334-788033(+) | protein_length=402 | sequence_SO=chromosome | SO=protein_coding	1
>PVP01_0405000.1-p1	liver stage antigen 3 | transcript_product=liver stage antigen 3 | location=PvP01_04_v1:223882-232279(-) | protein_length=2731 | sequence_SO=chromosome | SO=protein_coding	1
>PVP01_0407200.1-p1	40S ribosomal protein S26 | transcript_product=40S ribosomal protein S26 | location=PvP01_04_v1:295790-296113(-) | protein_length=107 | sequence_SO=chromosome | SO=protein_coding	1
>PVP01_0407900.1-p1	ATP synthase F1, alpha subunit | transcript_product=ATP synthase F1, alpha subunit | location=PvP01_04_v1:320722-322416(-) | protein_length=564 | sequence_SO=chromosome | SO=protein_coding	1
>PVP01_0409300.1-p1	DNA-directed RNA polymerase II subunit RPB2 | transcript_product=DNA-directed RNA polymerase II subunit RPB2 | location=PvP01_04_v1:376027-380175(-) | protein_length=1346 | sequence_SO=chromosome | SO=protein_coding	1
>PVP01_0409900.1-p1	acyl-CoA synthetase | transcript_product=acyl-CoA synthetase | location=PvP01_04_v1:399586-401784(+) | protein_length=732 | sequence_SO=chromosome | SO=protein_coding	1
>PVP01_0410900.1-p1	T-complex protein 1 subunit theta | transcript_product=T-complex protein 1 subunit theta | location=PvP01_04_v1:447288-449168(-) | protein_length=544 | sequence_SO=chromosome | SO=protein_coding	1
>PVP01_0411800.1-p1	protein SIS1 | transcript_product=protein SIS1 | location=PvP01_04_v1:474978-476353(-) | protein_length=328 | sequence_SO=chromosome | SO=protein_coding	1
>PVP01_0413100.1-p1	asparagine--tRNA ligase | transcript_product=asparagine--tRNA ligase | location=PvP01_04_v1:534169-535911(-) | protein_length=580 | sequence_SO=chromosome | SO=protein_coding	1
>PVP01_0414700.1-p1	conserved Plasmodium protein, unknown function | transcript_product=conserved Plasmodium protein, unknown function | location=PvP01_04_v1:595657-602627(+) | protein_length=2249 | sequence_SO=chromosome | SO=protein_coding	1
>PVP01_0414800.1-p1	60S ribosomal protein L37ae | transcript_product=60S ribosomal protein L37ae | location=PvP01_04_v1:603071-603933(-) | protein_length=96 | sequence_SO=chromosome | SO=protein_coding	1
>PVP01_0415000.1-p1	ATP-dependent RNA helicase UAP56 | transcript_product=ATP-dependent RNA helicase UAP56 | location=PvP01_04_v1:609730-611288(+) | protein_length=473 | sequence_SO=chromosome | SO=protein_coding	1
>PVP01_0415400.1-p1	conserved protein, unknown function | transcript_product=conserved protein, unknown function | location=PvP01_04_v1:624235-626468(+) | protein_length=455 | sequence_SO=chromosome | SO=protein_coding	1
>PVP01_0417000.1-p1	serine-repeat antigen 3 (SERA) | transcript_product=serine-repeat antigen 3 (SERA) | location=PvP01_04_v1:696338-700113(+) | protein_length=1105 | sequence_SO=chromosome | SO=protein_coding	1
>PVP01_0417100.1-p1	serine-repeat antigen 1 (SERA) | transcript_product=serine-repeat antigen 1 (SERA) | location=PvP01_04_v1:701056-704768(+) | protein_length=1067 | sequence_SO=chromosome | SO=protein_coding	1
>PVP01_0417200.1-p1	serine-repeat antigen 5 (SERA) | transcript_product=serine-repeat antigen 5 (SERA) | location=PvP01_04_v1:705835-709431(+) | protein_length=1059 | sequence_SO=chromosome | SO=protein_coding;>PVP01_0416900.1-p1 | transcript=PVP01_0416900.1 | gene=PVP01_041	1
>PVP01_0417300.1-p1	serine-repeat antigen 4 (SERA) | transcript_product=serine-repeat antigen 4 (SERA) | location=PvP01_04_v1:711606-715603(+) | protein_length=1133 | sequence_SO=chromosome | SO=protein_coding	1
>PVP01_0417600.1-p1	serine-repeat antigen 5 (SERA) | transcript_product=serine-repeat antigen 5 (SERA) | location=PvP01_04_v1:724965-728614(+) | protein_length=995 | sequence_SO=chromosome | SO=protein_coding	1
>PVP01_0417700.1-p1	serine-repeat antigen (SERA) | transcript_product=serine-repeat antigen (SERA) | location=PvP01_04_v1:729808-733689(+) | protein_length=1127 | sequence_SO=chromosome | SO=protein_coding	1
>PVP01_0417800.1-p1	serine-repeat antigen (SERA) | transcript_product=serine-repeat antigen (SERA) | location=PvP01_04_v1:735198-738811(+) | protein_length=1017 | sequence_SO=chromosome | SO=protein_coding	1
>PVP01_0419200.1-p1	26S proteasome regulatory subunit RPN1 | transcript_product=26S proteasome regulatory subunit RPN1 | location=PvP01_04_v1:795223-798861(-) | protein_length=1039 | sequence_SO=chromosome | SO=protein_coding	1
>PVP01_0420400.1-p1	hexose transporter | transcript_product=hexose transporter | location=PvP01_04_v1:829177-830685(+) | protein_length=502 | sequence_SO=chromosome | SO=protein_coding	1
>PVP01_0422100.1-p1	repetitive organellar protein | transcript_product=repetitive organellar protein | location=PvP01_04_v1:892242-897866(+) | protein_length=1874 | sequence_SO=chromosome | SO=protein_coding	1
>PVP01_0422600.1-p1	early transcribed membrane protein | transcript_product=early transcribed membrane protein | location=PvP01_04_v1:912914-913246(-) | protein_length=110 | sequence_SO=chromosome | SO=protein_coding	1
>PVP01_0422800.1-p1	Plasmodium exported protein (PHIST), unknown function | transcript_product=Plasmodium exported protein (PHIST), unknown function | location=PvP01_04_v1:925295-928713(+) | protein_length=1025 | sequence_SO=chromosome | SO=protein_coding	1
>PVP01_0423000.1-p1	Plasmodium exported protein, unknown function | transcript_product=Plasmodium exported protein, unknown function | location=PvP01_04_v1:936736-937920(+) | protein_length=304 | sequence_SO=chromosome | SO=protein_coding	1
>PVP01_0423300.1-p1	hypothetical protein | transcript_product=hypothetical protein | location=PvP01_04_v1:950413-951012(+) | protein_length=142 | sequence_SO=chromosome | SO=protein_coding	1
>PVP01_0503800.1-p1	Plasmodium exported protein (PHIST), unknown function | transcript_product=Plasmodium exported protein (PHIST), unknown function | location=PvP01_05_v1:159460-161131(+) | protein_length=483 | sequence_SO=chromosome | SO=protein_coding	1
>PVP01_0506500.1-p1	protein disulfide isomerase | transcript_product=protein disulfide isomerase | location=PvP01_05_v1:285877-287443(+) | protein_length=482 | sequence_SO=chromosome | SO=protein_coding	1
>PVP01_0507600.1-p1	receptor for activated c kinase | transcript_product=receptor for activated c kinase | location=PvP01_05_v1:335035-336445(+) | protein_length=322 | sequence_SO=chromosome | SO=protein_coding	1
>PVP01_0508200.1-p1	E3 ubiquitin-protein ligase | transcript_product=E3 ubiquitin-protein ligase | location=PvP01_05_v1:359975-385651(+) | protein_length=8558 | sequence_SO=chromosome | SO=protein_coding	1
>PVP01_0510100.1-p1	conserved Plasmodium protein, unknown function | transcript_product=conserved Plasmodium protein, unknown function | location=PvP01_05_v1:444902-448657(-) | protein_length=1109 | sequence_SO=chromosome | SO=protein_coding	1
>PVP01_0510500.1-p1	DnaJ protein | transcript_product=DnaJ protein | location=PvP01_05_v1:458994-461069(-) | protein_length=691 | sequence_SO=chromosome | SO=protein_coding	1
>PVP01_0511700.1-p1	protein transport protein SEC23 | transcript_product=protein transport protein SEC23 | location=PvP01_05_v1:503388-505806(-) | protein_length=759 | sequence_SO=chromosome | SO=protein_coding	1
>PVP01_0512500.1-p1	protein transport protein SEC61 subunit beta | transcript_product=protein transport protein SEC61 subunit beta | location=PvP01_05_v1:526186-526949(-) | protein_length=121 | sequence_SO=chromosome | SO=protein_coding	1
>PVP01_0513600.1-p1	2-oxoglutarate dehydrogenase E1 component, mitochondrial precursor | transcript_product=2-oxoglutarate dehydrogenase E1 component, mitochondrial precursor | location=PvP01_05_v1:568192-571513(-) | protein_length=1059 | sequence_SO=chro	1
>PVP01_0514400.1-p1	U6 snRNA-associated Sm-like protein LSm3 | transcript_product=U6 snRNA-associated Sm-like protein LSm3 | location=PvP01_05_v1:604006-604844(+) | protein_length=91 | sequence_SO=chromosome | SO=protein_coding	1
>PVP01_0515400.1-p1	heat shock protein 70 | transcript_product=heat shock protein 70 | location=PvP01_05_v1:641615-643687(-) | protein_length=690 | sequence_SO=chromosome | SO=protein_coding	1
>PVP01_0517100.1-p1	14-3-3 protein | transcript_product=14-3-3 protein | location=PvP01_05_v1:716149-717633(-) | protein_length=262 | sequence_SO=chromosome | SO=protein_coding	1
>PVP01_0517600.1-p1	rhoptry neck protein 5 | transcript_product=rhoptry neck protein 5 | location=PvP01_05_v1:735100-743082(+) | protein_length=1158 | sequence_SO=chromosome | SO=protein_coding	1
>PVP01_0517800.1-p1	protein kinase c inhibitor-like protein | transcript_product=protein kinase c inhibitor-like protein | location=PvP01_05_v1:747955-749252(-) | protein_length=185 | sequence_SO=chromosome | SO=protein_coding	1
>PVP01_0518700.1-p1	chaperone protein ClpB1 | transcript_product=chaperone protein ClpB1 | location=PvP01_05_v1:775393-778665(+) | protein_length=1090 | sequence_SO=chromosome | SO=protein_coding	1
>PVP01_0519700.1-p1	eukaryotic translation initiation factor 3 subunit G | transcript_product=eukaryotic translation initiation factor 3 subunit G | location=PvP01_05_v1:808160-810266(+) | protein_length=269 | sequence_SO=chromosome | SO=protein_coding	1
>PVP01_0520100.1-p1	26S protease regulatory subunit 6B | transcript_product=26S protease regulatory subunit 6B | location=PvP01_05_v1:816808-818171(-) | protein_length=392 | sequence_SO=chromosome | SO=protein_coding	1
>PVP01_0521500.1-p1	arsenical pump-driving ATPase | transcript_product=arsenical pump-driving ATPase | location=PvP01_05_v1:872510-873634(-) | protein_length=374 | sequence_SO=chromosome | SO=protein_coding	1
>PVP01_0522400.1-p1	60S ribosomal protein L15 | transcript_product=60S ribosomal protein L15 | location=PvP01_05_v1:900524-901352(-) | protein_length=205 | sequence_SO=chromosome | SO=protein_coding	1
>PVP01_0526200.1-p1	small GTP-binding protein sar1 | transcript_product=small GTP-binding protein sar1 | location=PvP01_05_v1:1058972-1059963(+) | protein_length=191 | sequence_SO=chromosome | SO=protein_coding	1
>PVP01_0526400.1-p1	conserved Plasmodium protein, unknown function | transcript_product=conserved Plasmodium protein, unknown function | location=PvP01_05_v1:1070413-1071498(+) | protein_length=319 | sequence_SO=chromosome | SO=protein_coding	1
>PVP01_0527600.1-p1	eukaryotic translation initiation factor 3 subunit M | transcript_product=eukaryotic translation initiation factor 3 subunit M | location=PvP01_05_v1:1141803-1143107(+) | protein_length=434 | sequence_SO=chromosome | SO=protein_coding	1
>PVP01_0529000.1-p1	ran-specific GTPase-activating protein 1 | transcript_product=ran-specific GTPase-activating protein 1 | location=PvP01_05_v1:1197705-1198913(+) | protein_length=278 | sequence_SO=chromosome | SO=protein_coding	1
>PVP01_0530800.1-p1	alpha tubulin 2 | transcript_product=alpha tubulin 2 | location=PvP01_05_v1:1309600-1311349(+) | protein_length=450 | sequence_SO=chromosome | SO=protein_coding|403281173|ref|XP_003932072.1| tubulin alpha-1B chain-like [Saimiri bol	1
>PVP01_0530900.1-p1	40S ribosomal protein S19 | transcript_product=40S ribosomal protein S19 | location=PvP01_05_v1:1314022-1314876(+) | protein_length=172 | sequence_SO=chromosome | SO=protein_coding	1
>PVP01_0532300.1-p1	early transcribed membrane protein | transcript_product=early transcribed membrane protein | location=PvP01_05_v1:1361360-1362476(-) | protein_length=145 | sequence_SO=chromosome | SO=protein_coding	1
>PVP01_0532900.1-p1	tryptophan-rich antigen | transcript_product=tryptophan-rich antigen | location=PvP01_05_v1:1391060-1392263(-) | protein_length=326 | sequence_SO=chromosome | SO=protein_coding	1
>PVP01_0600400.1-p1	PIR protein | transcript_product=PIR protein | location=PvP01_06_v1:15185-16835(-) | protein_length=462 | sequence_SO=chromosome | SO=protein_coding	1
>PVP01_0600900.1-p1	Plasmodium exported protein, unknown function | transcript_product=Plasmodium exported protein, unknown function | location=PvP01_06_v1:39348-41312(+) | protein_length=601 | sequence_SO=chromosome | SO=protein_coding	1
>PVP01_0601200.1-p1	Plasmodium exported protein, unknown function | transcript_product=Plasmodium exported protein, unknown function | location=PvP01_06_v1:54978-56962(+) | protein_length=559 | sequence_SO=chromosome | SO=protein_coding	1
>PVP01_0601500.1-p1	Plasmodium exported protein (PHIST), unknown function | transcript_product=Plasmodium exported protein (PHIST), unknown function | location=PvP01_06_v1:66153-68070(-) | protein_length=551 | sequence_SO=chromosome | SO=protein_coding	1
>PVP01_0603100.1-p1	26S proteasome regulatory subunit p55 | transcript_product=26S proteasome regulatory subunit p55 | location=PvP01_06_v1:121159-122804(+) | protein_length=467 | sequence_SO=chromosome | SO=protein_coding	1
>PVP01_0604600.1-p1	60S ribosomal protein L30e | transcript_product=60S ribosomal protein L30e | location=PvP01_06_v1:188869-189323(+) | protein_length=108 | sequence_SO=chromosome | SO=protein_coding	1
>PVP01_0606100.1-p1	ADP-ribosylation factor | transcript_product=ADP-ribosylation factor | location=PvP01_06_v1:245359-246687(-) | protein_length=181 | sequence_SO=chromosome | SO=protein_coding	1
>PVP01_0606800.1-p1	deoxyribose-phosphate aldolase | transcript_product=deoxyribose-phosphate aldolase | location=PvP01_06_v1:272127-272918(+) | protein_length=263 | sequence_SO=chromosome | SO=protein_coding	1
>PVP01_0607300.1-p1	conserved Plasmodium protein, unknown function | transcript_product=conserved Plasmodium protein, unknown function | location=PvP01_06_v1:322460-323519(-) | protein_length=272 | sequence_SO=chromosome | SO=protein_coding	1
>PVP01_0607700.1-p1	citrate synthase, mitochondrial | transcript_product=citrate synthase, mitochondrial | location=PvP01_06_v1:346932-348575(-) | protein_length=547 | sequence_SO=chromosome | SO=protein_coding	1
>PVP01_0610000.1-p1	conserved Plasmodium protein, unknown function | transcript_product=conserved Plasmodium protein, unknown function | location=PvP01_06_v1:439118-442513(+) | protein_length=1131 | sequence_SO=chromosome | SO=protein_coding	1
>PVP01_0610500.1-p1	conserved Plasmodium protein, unknown function | transcript_product=conserved Plasmodium protein, unknown function | location=PvP01_06_v1:460572-463313(-) | protein_length=913 | sequence_SO=chromosome | SO=protein_coding	1
>PVP01_0611900.1-p1	40S ribosomal protein S2 | transcript_product=40S ribosomal protein S2 | location=PvP01_06_v1:525202-526224(+) | protein_length=263 | sequence_SO=chromosome | SO=protein_coding	1
>PVP01_0612400.1-p1	merozoite capping protein 1 | transcript_product=merozoite capping protein 1 | location=PvP01_06_v1:542970-545119(-) | protein_length=485 | sequence_SO=chromosome | SO=protein_coding	1
>PVP01_0612900.1-p1	60S ribosomal protein L3 | transcript_product=60S ribosomal protein L3 | location=PvP01_06_v1:556916-558076(-) | protein_length=386 | sequence_SO=chromosome | SO=protein_coding|403282966|ref|XP_003932901.1| 60S ribosomal protein L3	1
>PVP01_0614700.1-p1	adenosine deaminase | transcript_product=adenosine deaminase | location=PvP01_06_v1:620120-621211(+) | protein_length=363 | sequence_SO=chromosome | SO=protein_coding	1
>PVP01_0615600.1-p1	26S proteasome regulatory subunit RPN9 | transcript_product=26S proteasome regulatory subunit RPN9 | location=PvP01_06_v1:660710-661885(+) | protein_length=391 | sequence_SO=chromosome | SO=protein_coding	1
>PVP01_0618300.1-p1	early transcribed membrane protein | transcript_product=early transcribed membrane protein | location=PvP01_06_v1:755775-757937(+) | protein_length=720 | sequence_SO=chromosome | SO=protein_coding	1
>PVP01_0618500.1-p1	haloacid dehalogenase-like hydrolase | transcript_product=haloacid dehalogenase-like hydrolase | location=PvP01_06_v1:761897-762775(+) | protein_length=292 | sequence_SO=chromosome | SO=protein_coding	1
>PVP01_0619000.1-p1	ubiquitin-conjugating enzyme | transcript_product=ubiquitin-conjugating enzyme | location=PvP01_06_v1:779067-780509(-) | protein_length=191 | sequence_SO=chromosome | SO=protein_coding	1
>PVP01_0620000.1-p1	methionine--tRNA ligase | transcript_product=methionine--tRNA ligase | location=PvP01_06_v1:812696-815356(+) | protein_length=886 | sequence_SO=chromosome | SO=protein_coding	1
>PVP01_0620400.1-p1	hypothetical protein | transcript_product=hypothetical protein | location=PvP01_06_v1:828653-830320(+) | protein_length=555 | sequence_SO=chromosome | SO=protein_coding	1
>PVP01_0620800.1-p1	conserved Plasmodium protein, unknown function | transcript_product=conserved Plasmodium protein, unknown function | location=PvP01_06_v1:842460-844625(+) | protein_length=721 | sequence_SO=chromosome | SO=protein_coding	1
>PVP01_0620900.1-p1	hypothetical protein | transcript_product=hypothetical protein | location=PvP01_06_v1:846474-847616(+) | protein_length=380 | sequence_SO=chromosome | SO=protein_coding	1
>PVP01_0621700.1-p1	ADP/ATP transporter on adenylate translocase | transcript_product=ADP/ATP transporter on adenylate translocase | location=PvP01_06_v1:884744-885649(-) | protein_length=301 | sequence_SO=chromosome | SO=protein_coding	1
>PVP01_0622100.1-p1	enhancer of rudimentary homolog | transcript_product=enhancer of rudimentary homolog | location=PvP01_06_v1:903461-904282(+) | protein_length=105 | sequence_SO=chromosome | SO=protein_coding	1
>PVP01_0623100.1-p1	Plasmodium exported protein, unknown function | transcript_product=Plasmodium exported protein, unknown function | location=PvP01_06_v1:940033-943891(+) | protein_length=1220 | sequence_SO=chromosome | SO=protein_coding	1
>PVP01_0623800.1-p1	duffy binding protein | transcript_product=duffy binding protein | location=PvP01_06_v1:982025-985813(+) | protein_length=1079 | sequence_SO=chromosome | SO=protein_coding	1
>PVP01_0701100.1-p1	reticulocyte binding protein 1b | transcript_product=reticulocyte binding protein 1b | location=PvP01_07_v1:60453-69211(-) | protein_length=2872 | sequence_SO=chromosome | SO=protein_coding	1
>PVP01_0701600.1-p1	ras-related protein RAB7 | transcript_product=ras-related protein RAB7 | location=PvP01_07_v1:90611-93019(-) | protein_length=206 | sequence_SO=chromosome | SO=protein_coding	1
>PVP01_0702100.1-p1	alpha tubulin 1 | transcript_product=alpha tubulin 1 | location=PvP01_07_v1:135347-137437(+) | protein_length=453 | sequence_SO=chromosome | SO=protein_coding	1
>PVP01_0702300.1-p1	60S ribosomal protein L32 | transcript_product=60S ribosomal protein L32 | location=PvP01_07_v1:145022-145939(+) | protein_length=131 | sequence_SO=chromosome | SO=protein_coding	1
>PVP01_0702800.1-p1	signal peptidase complex subunit 3 | transcript_product=signal peptidase complex subunit 3 | location=PvP01_07_v1:168770-169327(-) | protein_length=185 | sequence_SO=chromosome | SO=protein_coding	1
>PVP01_0703000.1-p1	ubiquitin specific protease | transcript_product=ubiquitin specific protease | location=PvP01_07_v1:174879-179837(+) | protein_length=1595 | sequence_SO=chromosome | SO=protein_coding	1
>PVP01_0703200.1-p1	replication protein A1, small fragment | transcript_product=replication protein A1, small fragment | location=PvP01_07_v1:184756-186593(+) | protein_length=485 | sequence_SO=chromosome | SO=protein_coding	1
>PVP01_0703300.1-p1	copper-transporting ATPase | transcript_product=copper-transporting ATPase | location=PvP01_07_v1:187292-193820(-) | protein_length=2064 | sequence_SO=chromosome | SO=protein_coding	1
>PVP01_0703800.1-p1	high molecular weight rhoptry protein 3 | transcript_product=high molecular weight rhoptry protein 3 | location=PvP01_07_v1:233006-237163(-) | protein_length=890 | sequence_SO=chromosome | SO=protein_coding	1
>PVP01_0705800.1-p1	conserved Plasmodium protein, unknown function | transcript_product=conserved Plasmodium protein, unknown function | location=PvP01_07_v1:327491-328399(-) | protein_length=302 | sequence_SO=chromosome | SO=protein_coding	1
>PVP01_0706200.1-p1	subunit of proteaseome activator complex | transcript_product=subunit of proteaseome activator complex | location=PvP01_07_v1:342047-342877(-) | protein_length=276 | sequence_SO=chromosome | SO=protein_coding	1
>PVP01_0708300.1-p1	small nuclear ribonucleoprotein Sm D3 | transcript_product=small nuclear ribonucleoprotein Sm D3 | location=PvP01_07_v1:425667-426317(+) | protein_length=116 | sequence_SO=chromosome | SO=protein_coding	1
>PVP01_0710400.1-p1	inhibitor of cysteine proteases | transcript_product=inhibitor of cysteine proteases | location=PvP01_07_v1:521761-523500(-) | protein_length=364 | sequence_SO=chromosome | SO=protein_coding	1
>PVP01_0710800.1-p1	alkaline phosphatase | transcript_product=alkaline phosphatase | location=PvP01_07_v1:536436-537997(-) | protein_length=445 | sequence_SO=chromosome | SO=protein_coding	1
>PVP01_0710900.1-p1	SAP domain-containing protein | transcript_product=SAP domain-containing protein | location=PvP01_07_v1:541510-544123(+) | protein_length=335 | sequence_SO=chromosome | SO=protein_coding	1
>PVP01_0711600.1-p1	elongation factor 1B | transcript_product=elongation factor 1B | location=PvP01_07_v1:561103-561945(+) | protein_length=280 | sequence_SO=chromosome | SO=protein_coding	1
>PVP01_0711800.1-p1	conserved Plasmodium protein, unknown function | transcript_product=conserved Plasmodium protein, unknown function | location=PvP01_07_v1:566548-567284(-) | protein_length=151 | sequence_SO=chromosome | SO=protein_coding	1
>PVP01_0712600.1-p1	phospholipid or glycerol acyltransferase | transcript_product=phospholipid or glycerol acyltransferase | location=PvP01_07_v1:593112-594800(-) | protein_length=419 | sequence_SO=chromosome | SO=protein_coding	1
>PVP01_0713500.1-p1	SUMO-conjugating enzyme UBC9 | transcript_product=SUMO-conjugating enzyme UBC9 | location=PvP01_07_v1:630597-631487(-) | protein_length=159 | sequence_SO=chromosome | SO=protein_coding	1
>PVP01_0713800.1-p1	6-phosphofructokinase | transcript_product=6-phosphofructokinase | location=PvP01_07_v1:638599-642864(-) | protein_length=1421 | sequence_SO=chromosome | SO=protein_coding	1
>PVP01_0716300.1-p1	heat shock protein 70 | transcript_product=heat shock protein 70 | location=PvP01_07_v1:727938-730337(+) | protein_length=652 | sequence_SO=chromosome | SO=protein_coding	1
>PVP01_0716400.1-p1	glideosome-associated protein 50 | transcript_product=glideosome-associated protein 50 | location=PvP01_07_v1:732339-733526(-) | protein_length=395 | sequence_SO=chromosome | SO=protein_coding	1
>PVP01_0716700.1-p1	eukaryotic translation initiation factor 3 subunit F | transcript_product=eukaryotic translation initiation factor 3 subunit F | location=PvP01_07_v1:743182-744336(-) | protein_length=320 | sequence_SO=chromosome | SO=protein_coding	1
>PVP01_0717400.1-p1	nucleosome assembly protein 1 | transcript_product=nucleosome assembly protein 1 | location=PvP01_07_v1:774154-775434(-) | protein_length=287 | sequence_SO=chromosome | SO=protein_coding	1
>PVP01_0718200.1-p1	TLD domain-containing protein | transcript_product=TLD domain-containing protein | location=PvP01_07_v1:799853-803041(-) | protein_length=960 | sequence_SO=chromosome | SO=protein_coding	1
>PVP01_0719200.1-p1	inosine-5'-monophosphate dehydrogenase | transcript_product=inosine-5'-monophosphate dehydrogenase | location=PvP01_07_v1:845417-846949(-) | protein_length=510 | sequence_SO=chromosome | SO=protein_coding	1
>PVP01_0720400.1-p1	conserved Plasmodium protein, unknown function | transcript_product=conserved Plasmodium protein, unknown function | location=PvP01_07_v1:884684-885526(+) | protein_length=280 | sequence_SO=chromosome | SO=protein_coding	1
>PVP01_0720600.1-p1	ubiquitin-like protein | transcript_product=ubiquitin-like protein | location=PvP01_07_v1:892137-897609(+) | protein_length=1441 | sequence_SO=chromosome | SO=protein_coding	1
>PVP01_0720700.1-p1	S-adenosylmethionine synthetase | transcript_product=S-adenosylmethionine synthetase | location=PvP01_07_v1:900508-901716(+) | protein_length=402 | sequence_SO=chromosome | SO=protein_coding	1
>PVP01_0721000.1-p1	phosphoglycerate kinase | transcript_product=phosphoglycerate kinase | location=PvP01_07_v1:911180-912430(+) | protein_length=416 | sequence_SO=chromosome | SO=protein_coding	1
>PVP01_0722300.1-p1	thioredoxin reductase | transcript_product=thioredoxin reductase | location=PvP01_07_v1:961091-962731(-) | protein_length=546 | sequence_SO=chromosome | SO=protein_coding	1
>PVP01_0724400.1-p1	conserved Plasmodium protein, unknown function | transcript_product=conserved Plasmodium protein, unknown function | location=PvP01_07_v1:1042098-1042910(+) | protein_length=211 | sequence_SO=chromosome | SO=protein_coding	1
>PVP01_0725200.1-p1	glutamine-dependent NAD(+) synthetase | transcript_product=glutamine-dependent NAD(+) synthetase | location=PvP01_07_v1:1089995-1092577(+) | protein_length=860 | sequence_SO=chromosome | SO=protein_coding	1
>PVP01_0727900.1-p1	high molecular weight rhoptry protein 2 | transcript_product=high molecular weight rhoptry protein 2 | location=PvP01_07_v1:1179506-1185578(+) | protein_length=1369 | sequence_SO=chromosome | SO=protein_coding	1
>PVP01_0728900.1-p1	merozoite surface protein 1 | transcript_product=merozoite surface protein 1 | location=PvP01_07_v1:1215432-1220636(+) | protein_length=1734 | sequence_SO=chromosome | SO=protein_coding	1
>PVP01_0730900.1-p1	profilin | transcript_product=profilin | location=PvP01_07_v1:1306278-1307481(+) | protein_length=173 | sequence_SO=chromosome | SO=protein_coding	1
>PVP01_0731500.1-p1	importin alpha re-exporter | transcript_product=importin alpha re-exporter | location=PvP01_07_v1:1320665-1325288(-) | protein_length=1392 | sequence_SO=chromosome | SO=protein_coding	1
>PVP01_0732300.1-p1	mitochondrial-processing peptidase subunit beta | transcript_product=mitochondrial-processing peptidase subunit beta | location=PvP01_07_v1:1347165-1348568(-) | protein_length=467 | sequence_SO=chromosome | SO=protein_coding	1
>PVP01_0733200.1-p1	V-type proton ATPase subunit E | transcript_product=V-type proton ATPase subunit E | location=PvP01_07_v1:1366622-1367528(-) | protein_length=235 | sequence_SO=chromosome | SO=protein_coding	1
>PVP01_0733400.1-p1	UBX domain | transcript_product=UBX domain | location=PvP01_07_v1:1372584-1374229(+) | protein_length=455 | sequence_SO=chromosome | SO=protein_coding	1
>PVP01_0734300.1-p1	conserved Plasmodium protein, unknown function | transcript_product=conserved Plasmodium protein, unknown function | location=PvP01_07_v1:1415686-1419343(+) | protein_length=990 | sequence_SO=chromosome | SO=protein_coding	1
>PVP01_0735000.1-p1	Plasmodium exported protein, unknown function | transcript_product=Plasmodium exported protein, unknown function | location=PvP01_07_v1:1450317-1452074(-) | protein_length=502 | sequence_SO=chromosome | SO=protein_coding	1
>PVP01_0800700.1-p1	reticulocyte binding protein 2b | transcript_product=reticulocyte binding protein 2b | location=PvP01_08_v1:34100-42808(+) | protein_length=2806 | sequence_SO=chromosome | SO=protein_coding	1
>PVP01_0801100.1-p1	Plasmodium exported protein, unknown function | transcript_product=Plasmodium exported protein, unknown function | location=PvP01_08_v1:57869-61364(-) | protein_length=1114 | sequence_SO=chromosome | SO=protein_coding	1
>PVP01_0801600.1-p1	Plasmodium exported protein, unknown function | transcript_product=Plasmodium exported protein, unknown function | location=PvP01_08_v1:83076-85373(-) | protein_length=707 | sequence_SO=chromosome | SO=protein_coding	1
>PVP01_0801700.1-p1	STP1 protein | transcript_product=STP1 protein | location=PvP01_08_v1:90326-91903(+) | protein_length=448 | sequence_SO=chromosome | SO=protein_coding	1
>PVP01_0802700.1-p1	conserved Plasmodium protein, unknown function | transcript_product=conserved Plasmodium protein, unknown function | location=PvP01_08_v1:137976-139326(+) | protein_length=126 | sequence_SO=chromosome | SO=protein_coding	1
>PVP01_0803300.1-p1	40S ribosomal protein S20e | transcript_product=40S ribosomal protein S20e | location=PvP01_08_v1:160645-161634(-) | protein_length=118 | sequence_SO=chromosome | SO=protein_coding	1
>PVP01_0803500.1-p1	conserved Plasmodium protein, unknown function | transcript_product=conserved Plasmodium protein, unknown function | location=PvP01_08_v1:167177-171034(-) | protein_length=1285 | sequence_SO=chromosome | SO=protein_coding	1
>PVP01_0803800.1-p1	60S ribosomal protein L13 | transcript_product=60S ribosomal protein L13 | location=PvP01_08_v1:181914-183099(-) | protein_length=202 | sequence_SO=chromosome | SO=protein_coding	1
>PVP01_0805200.1-p1	regulator of nonsense transcripts 1 | transcript_product=regulator of nonsense transcripts 1 | location=PvP01_08_v1:236900-241564(-) | protein_length=1554 | sequence_SO=chromosome | SO=protein_coding	1
>PVP01_0805900.1-p1	DNA/RNA-binding protein Alba 3 | transcript_product=DNA/RNA-binding protein Alba 3 | location=PvP01_08_v1:266131-267209(-) | protein_length=107 | sequence_SO=chromosome | SO=protein_coding	1
>PVP01_0806500.1-p1	single-strand telomeric DNA-binding protein GBP2 | transcript_product=single-strand telomeric DNA-binding protein GBP2 | location=PvP01_08_v1:283268-284886(+) | protein_length=250 | sequence_SO=chromosome | SO=protein_coding	1
>PVP01_0807600.1-p1	eukaryotic translation initiation factor 3 subunit D | transcript_product=eukaryotic translation initiation factor 3 subunit D | location=PvP01_08_v1:328257-329894(+) | protein_length=545 | sequence_SO=chromosome | SO=protein_coding	1
>PVP01_0808100.1-p1	26S protease regulatory subunit 4 | transcript_product=26S protease regulatory subunit 4 | location=PvP01_08_v1:362144-363776(-) | protein_length=447 | sequence_SO=chromosome | SO=protein_coding	1
>PVP01_0808400.1-p1	tubulin beta chain | transcript_product=tubulin beta chain | location=PvP01_08_v1:376354-378565(-) | protein_length=445 | sequence_SO=chromosome | SO=protein_coding	1
>PVP01_0808600.1-p1	Plasmodium exported protein (PHIST), unknown function | transcript_product=Plasmodium exported protein (PHIST), unknown function | location=PvP01_08_v1:393884-394989(-) | protein_length=285 | sequence_SO=chromosome | SO=protein_coding	1
>PVP01_0808900.1-p1	adenylate kinase | transcript_product=adenylate kinase | location=PvP01_08_v1:406219-407218(-) | protein_length=242 | sequence_SO=chromosome | SO=protein_coding	1
>PVP01_0809900.1-p1	kinesin-4 | transcript_product=kinesin-4 | location=PvP01_08_v1:436213-446296(-) | protein_length=3269 | sequence_SO=chromosome | SO=protein_coding	1
>PVP01_0810700.1-p1	eukaryotic translation initiation factor 2 subunit beta | transcript_product=eukaryotic translation initiation factor 2 subunit beta | location=PvP01_08_v1:470509-471354(-) | protein_length=222 | sequence_SO=chromosome | SO=protein_cod	1
>PVP01_0810800.1-p1	dolichyl-phosphate-mannose protein mannosyltransferase | transcript_product=dolichyl-phosphate-mannose protein mannosyltransferase | location=PvP01_08_v1:473747-475586(+) | protein_length=224 | sequence_SO=chromosome | SO=protein_codin	1
>PVP01_0811500.1-p1	proteasome subunit beta type-5 | transcript_product=proteasome subunit beta type-5 | location=PvP01_08_v1:492259-493080(-) | protein_length=273 | sequence_SO=chromosome | SO=protein_coding	1
>PVP01_0811900.1-p1	PRE-binding protein | transcript_product=PRE-binding protein | location=PvP01_08_v1:507941-510898(+) | protein_length=985 | sequence_SO=chromosome | SO=protein_coding	1
>PVP01_0812500.1-p1	hypoxanthine-guanine phosphoribosyltransferase | transcript_product=hypoxanthine-guanine phosphoribosyltransferase | location=PvP01_08_v1:530548-531731(-) | protein_length=233 | sequence_SO=chromosome | SO=protein_coding	1
>PVP01_0812700.1-p1	GMP synthase [glutamine-hydrolyzing] | transcript_product=GMP synthase [glutamine-hydrolyzing] | location=PvP01_08_v1:537639-539282(-) | protein_length=547 | sequence_SO=chromosome | SO=protein_coding	1
>PVP01_0814200.1-p1	conserved Plasmodium protein, unknown function | transcript_product=conserved Plasmodium protein, unknown function | location=PvP01_08_v1:613890-618680(+) | protein_length=1596 | sequence_SO=chromosome | SO=protein_coding	1
>PVP01_0815300.1-p1	cysteine--tRNA ligase | transcript_product=cysteine--tRNA ligase | location=PvP01_08_v1:680179-683044(-) | protein_length=686 | sequence_SO=chromosome | SO=protein_coding	1
>PVP01_0815700.1-p1	heat shock protein 60 | transcript_product=heat shock protein 60 | location=PvP01_08_v1:692390-694405(-) | protein_length=580 | sequence_SO=chromosome | SO=protein_coding	1
>PVP01_0816000.1-p1	enolase | transcript_product=enolase | location=PvP01_08_v1:703699-705643(+) | protein_length=446 | sequence_SO=chromosome | SO=protein_coding|403279766|ref|XP_003931416.1| beta-enolase isoform 1 ;>	1
>PVP01_0816400.1-p1	conserved Plasmodium protein, unknown function | transcript_product=conserved Plasmodium protein, unknown function | location=PvP01_08_v1:715852-719129(-) | protein_length=1030 | sequence_SO=chromosome | SO=protein_coding	1
>PVP01_0816600.1-p1	conserved Plasmodium protein, unknown function | transcript_product=conserved Plasmodium protein, unknown function | location=PvP01_08_v1:727599-730157(-) | protein_length=709 | sequence_SO=chromosome | SO=protein_coding	1
>PVP01_0816900.1-p1	conserved protein, unknown function | transcript_product=conserved protein, unknown function | location=PvP01_08_v1:738373-739527(-) | protein_length=384 | sequence_SO=chromosome | SO=protein_coding	1
>PVP01_0817300.1-p1	40S ribosomal protein S3A | transcript_product=40S ribosomal protein S3A | location=PvP01_08_v1:751925-753161(+) | protein_length=262 | sequence_SO=chromosome | SO=protein_coding	1
>PVP01_0818200.1-p1	peptidyl-prolyl cis-trans isomerase | transcript_product=peptidyl-prolyl cis-trans isomerase | location=PvP01_08_v1:789722-790234(+) | protein_length=170 | sequence_SO=chromosome | SO=protein_coding;REV__>PVP01_0320000.1-p1 | transcrip	1
>PVP01_0819300.1-p1	histone H2A variant | transcript_product=histone H2A variant | location=PvP01_08_v1:844552-845548(-) | protein_length=158 | sequence_SO=chromosome | SO=protein_coding	1
>PVP01_0819400.1-p1	ATP-dependent RNA helicase DDX6 | transcript_product=ATP-dependent RNA helicase DDX6 | location=PvP01_08_v1:848920-850632(-) | protein_length=433 | sequence_SO=chromosome | SO=protein_coding	1
>PVP01_0819900.1-p1	T-complex protein 1 subunit epsilon | transcript_product=T-complex protein 1 subunit epsilon | location=PvP01_08_v1:879599-881206(-) | protein_length=535 | sequence_SO=chromosome | SO=protein_coding	1
>PVP01_0820100.1-p1	protein transport protein SEC22 | transcript_product=protein transport protein SEC22 | location=PvP01_08_v1:885075-886733(-) | protein_length=221 | sequence_SO=chromosome | SO=protein_coding	1
>PVP01_0820600.1-p1	elongation factor 1 (EF-1) | transcript_product=elongation factor 1 (EF-1) | location=PvP01_08_v1:907081-907974(-) | protein_length=156 | sequence_SO=chromosome | SO=protein_coding	1
>PVP01_0822500.1-p1	40S ribosomal protein S11 | transcript_product=40S ribosomal protein S11 | location=PvP01_08_v1:998856-1000067(-) | protein_length=161 | sequence_SO=chromosome | SO=protein_coding	1
>PVP01_0823100.1-p1	proteasome subunit alpha type-3 | transcript_product=proteasome subunit alpha type-3 | location=PvP01_08_v1:1038808-1039667(+) | protein_length=253 | sequence_SO=chromosome | SO=protein_coding	1
>PVP01_0823300.1-p1	40S ribosomal protein S15A | transcript_product=40S ribosomal protein S15A | location=PvP01_08_v1:1043932-1044453(-) | protein_length=130 | sequence_SO=chromosome | SO=protein_coding	1
>PVP01_0823400.1-p1	protein YOP1 | transcript_product=protein YOP1 | location=PvP01_08_v1:1046587-1047398(-) | protein_length=227 | sequence_SO=chromosome | SO=protein_coding	1
>PVP01_0823500.1-p1	formate-nitrite transporter | transcript_product=formate-nitrite transporter | location=PvP01_08_v1:1050763-1052193(+) | protein_length=313 | sequence_SO=chromosome | SO=protein_coding	1
>PVP01_0825000.1-p1	eukaryotic translation initiation factor 4E | transcript_product=eukaryotic translation initiation factor 4E | location=PvP01_08_v1:1116971-1117654(+) | protein_length=227 | sequence_SO=chromosome | SO=protein_coding	1
>PVP01_0827400.1-p1	60S ribosomal protein L26 | transcript_product=60S ribosomal protein L26 | location=PvP01_08_v1:1198407-1199341(-) | protein_length=127 | sequence_SO=chromosome | SO=protein_coding	1
>PVP01_0827900.1-p1	26S proteasome regulatory subunit RPN12 | transcript_product=26S proteasome regulatory subunit RPN12 | location=PvP01_08_v1:1210379-1211290(-) | protein_length=303 | sequence_SO=chromosome | SO=protein_coding	1
>PVP01_0829900.1-p1	phosphoglycerate mutase | transcript_product=phosphoglycerate mutase | location=PvP01_08_v1:1289044-1293222(-) | protein_length=1318 | sequence_SO=chromosome | SO=protein_coding	1
>PVP01_0830600.1-p1	60S acidic ribosomal protein P2 | transcript_product=60S acidic ribosomal protein P2 | location=PvP01_08_v1:1327521-1327856(-) | protein_length=111 | sequence_SO=chromosome | SO=protein_coding	1
>PVP01_0830700.1-p1	asparagine synthetase [glutamine-hydrolyzing] | transcript_product=asparagine synthetase [glutamine-hydrolyzing] | location=PvP01_08_v1:1329996-1332389(-) | protein_length=613 | sequence_SO=chromosome | SO=protein_coding	1
>PVP01_0831100.1-p1	conserved Plasmodium protein, unknown function | transcript_product=conserved Plasmodium protein, unknown function | location=PvP01_08_v1:1345408-1346864(+) | protein_length=171 | sequence_SO=chromosome | SO=protein_coding	1
>PVP01_0832000.1-p1	T-complex protein 1, eta subunit | transcript_product=T-complex protein 1, eta subunit | location=PvP01_08_v1:1369899-1371678(+) | protein_length=540 | sequence_SO=chromosome | SO=protein_coding	1
>PVP01_0833000.1-p1	60S ribosomal protein L7 | transcript_product=60S ribosomal protein L7 | location=PvP01_08_v1:1416599-1417775(+) | protein_length=256 | sequence_SO=chromosome | SO=protein_coding	1
>PVP01_0833100.1-p1	40S ribosomal protein S12 | transcript_product=40S ribosomal protein S12 | location=PvP01_08_v1:1419315-1419938(+) | protein_length=143 | sequence_SO=chromosome | SO=protein_coding	1
>PVP01_0833200.1-p1	40S ribosomal protein S23 | transcript_product=40S ribosomal protein S23 | location=PvP01_08_v1:1420874-1422074(-) | protein_length=138 | sequence_SO=chromosome | SO=protein_coding	1
>PVP01_0833400.1-p1	T-complex protein 1 subunit beta | transcript_product=T-complex protein 1 subunit beta | location=PvP01_08_v1:1424407-1426005(+) | protein_length=532 | sequence_SO=chromosome | SO=protein_coding	1
>PVP01_0833800.1-p1	FAD-dependent glycerol-3-phosphate dehydrogenase | transcript_product=FAD-dependent glycerol-3-phosphate dehydrogenase | location=PvP01_08_v1:1430965-1432932(-) | protein_length=655 | sequence_SO=chromosome | SO=protein_coding	1
>PVP01_0833900.1-p1	glutaredoxin 1 | transcript_product=glutaredoxin 1 | location=PvP01_08_v1:1434791-1435713(+) | protein_length=110 | sequence_SO=chromosome | SO=protein_coding	1
>PVP01_0834000.1-p1	activator of Hsp90 ATPase | transcript_product=activator of Hsp90 ATPase | location=PvP01_08_v1:1436167-1438096(-) | protein_length=367 | sequence_SO=chromosome | SO=protein_coding	1
>PVP01_0834500.1-p1	ubiquitin-conjugating enzyme E2 | transcript_product=ubiquitin-conjugating enzyme E2 | location=PvP01_08_v1:1453070-1453923(+) | protein_length=139 | sequence_SO=chromosome | SO=protein_coding	1
>PVP01_0836500.1-p1	lipoamide acyltransferase component of branched- chain alpha-keto acid dehydrogenase complex | transcript_product=lipoamide acyltransferase component of branched- chain alpha-keto acid dehydrogenase complex | location=PvP01_08_v1:15389	1
>PVP01_0837200.1-p1	N-ethylmaleimide-sensitive fusion protein | transcript_product=N-ethylmaleimide-sensitive fusion protein | location=PvP01_08_v1:1569150-1571507(+) | protein_length=785 | sequence_SO=chromosome | SO=protein_coding	1
>PVP01_0837300.1-p1	exportin-1 | transcript_product=exportin-1 | location=PvP01_08_v1:1574873-1578925(+) | protein_length=1250 | sequence_SO=chromosome | SO=protein_coding	1
>PVP01_0838100.1-p1	Plasmodium exported protein, unknown function | transcript_product=Plasmodium exported protein, unknown function | location=PvP01_08_v1:1616271-1617247(+) | protein_length=261 | sequence_SO=chromosome | SO=protein_coding	1
>PVP01_0903900.1-p1	60S acidic ribosomal protein P1 | transcript_product=60S acidic ribosomal protein P1 | location=PvP01_09_v1:255761-256514(-) | protein_length=119 | sequence_SO=chromosome | SO=protein_coding	1
>PVP01_0904500.1-p1	casein kinase II beta chain | transcript_product=casein kinase II beta chain | location=PvP01_09_v1:277334-278068(+) | protein_length=244 | sequence_SO=chromosome | SO=protein_coding	1
>PVP01_0904600.1-p1	CCR4-NOT transcription complex subunit 1 | transcript_product=CCR4-NOT transcription complex subunit 1 | location=PvP01_09_v1:281582-291853(+) | protein_length=3423 | sequence_SO=chromosome | SO=protein_coding	1
>PVP01_0905200.1-p1	thioredoxin | transcript_product=thioredoxin | location=PvP01_09_v1:315269-316690(+) | protein_length=430 | sequence_SO=chromosome | SO=protein_coding	1
>PVP01_0905800.1-p1	histone H4 | transcript_product=histone H4 | location=PvP01_09_v1:342360-342671(-) | protein_length=103 | sequence_SO=chromosome | SO=protein_coding	1
>PVP01_0905900.1-p1	histone 2B | transcript_product=histone 2B | location=PvP01_09_v1:346622-346978(+) | protein_length=118 | sequence_SO=chromosome | SO=protein_coding	1
>PVP01_0906200.1-p1	40S ribosomal protein S4 | transcript_product=40S ribosomal protein S4 | location=PvP01_09_v1:356278-357710(-) | protein_length=261 | sequence_SO=chromosome | SO=protein_coding;REV__>PVP01_1147700.1-p1 | transcript=PVP01_1147700.1 | ge	1
>PVP01_0906400.1-p1	translocon component PTEX88 | transcript_product=translocon component PTEX88 | location=PvP01_09_v1:361407-363659(-) | protein_length=750 | sequence_SO=chromosome | SO=protein_coding	1
>PVP01_0906600.1-p1	conserved Apicomplexan protein, unknown function | transcript_product=conserved Apicomplexan protein, unknown function | location=PvP01_09_v1:371028-373160(+) | protein_length=266 | sequence_SO=chromosome | SO=protein_coding	1
>PVP01_0908100.1-p1	polyadenylate-binding protein-interacting protein 1 | transcript_product=polyadenylate-binding protein-interacting protein 1 | location=PvP01_09_v1:424405-435999(-) | protein_length=3864 | sequence_SO=chromosome | SO=protein_coding	1
>PVP01_0909200.1-p1	casein kinase 2, alpha subunit | transcript_product=casein kinase 2, alpha subunit | location=PvP01_09_v1:493076-494083(+) | protein_length=335 | sequence_SO=chromosome | SO=protein_coding	1
>PVP01_0909400.1-p1	endoplasmic reticulum-resident calcium binding protein | transcript_product=endoplasmic reticulum-resident calcium binding protein | location=PvP01_09_v1:498657-499691(-) | protein_length=344 | sequence_SO=chromosome | SO=protein_codin	1
>PVP01_0909500.1-p1	DnaJ domain containing protein | transcript_product=DnaJ domain containing protein | location=PvP01_09_v1:501995-503644(-) | protein_length=549 | sequence_SO=chromosome | SO=protein_coding	1
>PVP01_0910700.1-p1	60S ribosomal protein L36 | transcript_product=60S ribosomal protein L36 | location=PvP01_09_v1:526228-526917(+) | protein_length=113 | sequence_SO=chromosome | SO=protein_coding	1
>PVP01_0911200.1-p1	asparagine-rich antigen | transcript_product=asparagine-rich antigen | location=PvP01_09_v1:545287-550606(+) | protein_length=1572 | sequence_SO=chromosome | SO=protein_coding	1
>PVP01_0914200.1-p1	ubiquitin domain-containing protein DSK2 | transcript_product=ubiquitin domain-containing protein DSK2 | location=PvP01_09_v1:656494-658175(-) | protein_length=394 | sequence_SO=chromosome | SO=protein_coding	1
>PVP01_0914500.1-p1	glyoxalase I | transcript_product=glyoxalase I | location=PvP01_09_v1:665184-666269(+) | protein_length=361 | sequence_SO=chromosome | SO=protein_coding	1
>PVP01_0916400.1-p1	peptidyl-prolyl cis-trans isomerase 11 | transcript_product=peptidyl-prolyl cis-trans isomerase 11 | location=PvP01_09_v1:736280-737370(-) | protein_length=193 | sequence_SO=chromosome | SO=protein_coding	1
>PVP01_0917000.1-p1	guanine nucleotide-exchange factor SEC12 | transcript_product=guanine nucleotide-exchange factor SEC12 | location=PvP01_09_v1:759296-760693(-) | protein_length=465 | sequence_SO=chromosome | SO=protein_coding	1
>PVP01_0917400.1-p1	heat shock protein 101 | transcript_product=heat shock protein 101 | location=PvP01_09_v1:775516-778707(-) | protein_length=905 | sequence_SO=chromosome | SO=protein_coding	1
>PVP01_0917900.1-p1	conserved Plasmodium protein, unknown function | transcript_product=conserved Plasmodium protein, unknown function | location=PvP01_09_v1:800955-801341(+) | protein_length=128 | sequence_SO=chromosome | SO=protein_coding	1
>PVP01_0918300.1-p1	GTP-binding nuclear protein RAN/TC4 | transcript_product=GTP-binding nuclear protein RAN/TC4 | location=PvP01_09_v1:809758-810578(-) | protein_length=214 | sequence_SO=chromosome | SO=protein_coding	1
>PVP01_0918800.1-p1	heat shock protein 90 | transcript_product=heat shock protein 90 | location=PvP01_09_v1:828347-830908(-) | protein_length=853 | sequence_SO=chromosome | SO=protein_coding	1
>PVP01_0918900.1-p1	insulinase | transcript_product=insulinase | location=PvP01_09_v1:833833-837780(+) | protein_length=1315 | sequence_SO=chromosome | SO=protein_coding	1
>PVP01_0920500.1-p1	conserved Plasmodium protein, unknown function | transcript_product=conserved Plasmodium protein, unknown function | location=PvP01_09_v1:889697-894409(+) | protein_length=1570 | sequence_SO=chromosome | SO=protein_coding	1
>PVP01_0920700.1-p1	phosphoglycerate mutase | transcript_product=phosphoglycerate mutase | location=PvP01_09_v1:901992-903179(+) | protein_length=250 | sequence_SO=chromosome | SO=protein_coding	1
>PVP01_0922200.1-p1	exported protein 1 | transcript_product=exported protein 1 | location=PvP01_09_v1:959772-960798(-) | protein_length=148 | sequence_SO=chromosome | SO=protein_coding	1
>PVP01_0922800.1-p1	cupin-like protein | transcript_product=cupin-like protein | location=PvP01_09_v1:989462-992321(-) | protein_length=447 | sequence_SO=chromosome | SO=protein_coding	1
>PVP01_0924000.1-p1	translation elongation factor EF-1, subunit alpha | transcript_product=translation elongation factor EF-1, subunit alpha | location=PvP01_09_v1:1074814-1076720(+) | protein_length=547 | sequence_SO=chromosome | SO=protein_coding	1
>PVP01_0924100.1-p1	conserved Plasmodium protein, unknown function | transcript_product=conserved Plasmodium protein, unknown function | location=PvP01_09_v1:1078029-1081664(-) | protein_length=1211 | sequence_SO=chromosome | SO=protein_coding	1
>PVP01_0925200.1-p1	ethanolamine kinase | transcript_product=ethanolamine kinase | location=PvP01_09_v1:1122463-1123866(-) | protein_length=467 | sequence_SO=chromosome | SO=protein_coding	1
>PVP01_0925600.1-p1	60S ribosomal protein L35 | transcript_product=60S ribosomal protein L35 | location=PvP01_09_v1:1142990-1143988(+) | protein_length=124 | sequence_SO=chromosome | SO=protein_coding;REV__>gi|403290663|ref|XP_003936429.1| PREDICTED: prot	1
>PVP01_0925800.1-p1	conserved Apicomplexan protein, unknown function | transcript_product=conserved Apicomplexan protein, unknown function | location=PvP01_09_v1:1147119-1148600(+) | protein_length=493 | sequence_SO=chromosome | SO=protein_coding	1
>PVP01_0926700.1-p1	threonine--tRNA ligase | transcript_product=threonine--tRNA ligase | location=PvP01_09_v1:1174659-1177421(-) | protein_length=920 | sequence_SO=chromosome | SO=protein_coding|403290305|ref|XP_003936261.1| PREDICTED: threonine--tRNA	1
>PVP01_0926900.1-p1	40S ribosomal protein S18 | transcript_product=40S ribosomal protein S18 | location=PvP01_09_v1:1183674-1184428(-) | protein_length=156 | sequence_SO=chromosome | SO=protein_coding	1
>PVP01_0927800.1-p1	deoxyuridine 5'-triphosphate nucleotidohydrolase | transcript_product=deoxyuridine 5'-triphosphate nucleotidohydrolase | location=PvP01_09_v1:1224103-1224684(-) | protein_length=193 | sequence_SO=chromosome | SO=protein_coding	1
>PVP01_0928300.1-p1	CRAL/TRIO domain-containing protein | transcript_product=CRAL/TRIO domain-containing protein | location=PvP01_09_v1:1237460-1239749(+) | protein_length=293 | sequence_SO=chromosome | SO=protein_coding	1
>PVP01_0928900.1-p1	prefoldin subunit 5 | transcript_product=prefoldin subunit 5 | location=PvP01_09_v1:1266502-1267587(-) | protein_length=247 | sequence_SO=chromosome | SO=protein_coding	1
>PVP01_0929100.1-p1	ATP-dependent 6-phosphofructokinase | transcript_product=ATP-dependent 6-phosphofructokinase | location=PvP01_09_v1:1269955-1275152(-) | protein_length=1441 | sequence_SO=chromosome | SO=protein_coding	1
>PVP01_0929700.1-p1	spermidine synthase | transcript_product=spermidine synthase | location=PvP01_09_v1:1293398-1294830(+) | protein_length=321 | sequence_SO=chromosome | SO=protein_coding	1
>PVP01_0929800.1-p1	parasitophorous vacuolar protein 1 | transcript_product=parasitophorous vacuolar protein 1 | location=PvP01_09_v1:1297607-1298896(+) | protein_length=429 | sequence_SO=chromosome | SO=protein_coding	1
>PVP01_0930700.1-p1	60S ribosomal protein L38 | transcript_product=60S ribosomal protein L38 | location=PvP01_09_v1:1332289-1332570(-) | protein_length=93 | sequence_SO=chromosome | SO=protein_coding	1
>PVP01_0930800.1-p1	60S ribosomal protein P0 | transcript_product=60S ribosomal protein P0 | location=PvP01_09_v1:1335060-1336007(+) | protein_length=315 | sequence_SO=chromosome | SO=protein_coding	1
>PVP01_0931200.1-p1	26S protease regulatory subunit 6A | transcript_product=26S protease regulatory subunit 6A | location=PvP01_09_v1:1338910-1340235(+) | protein_length=441 | sequence_SO=chromosome | SO=protein_coding|403254737|ref|XP_003920115.1| PR	1
>PVP01_0933000.1-p1	T-complex protein 1, alpha subunit | transcript_product=T-complex protein 1, alpha subunit | location=PvP01_09_v1:1413429-1415302(-) | protein_length=543 | sequence_SO=chromosome | SO=protein_coding	1
>PVP01_0933600.1-p1	aquaglyceroporin | transcript_product=aquaglyceroporin | location=PvP01_09_v1:1435985-1436761(+) | protein_length=258 | sequence_SO=chromosome | SO=protein_coding	1
>PVP01_0934200.1-p1	apical membrane antigen 1 | transcript_product=apical membrane antigen 1 | location=PvP01_09_v1:1459296-1460984(+) | protein_length=562 | sequence_SO=chromosome | SO=protein_coding	1
>PVP01_0934800.1-p1	heat shock protein 70 | transcript_product=heat shock protein 70 | location=PvP01_09_v1:1483505-1485496(+) | protein_length=663 | sequence_SO=chromosome | SO=protein_coding	1
>PVP01_0934900.1-p1	protein disulfide isomerase | transcript_product=protein disulfide isomerase | location=PvP01_09_v1:1486738-1488012(-) | protein_length=424 | sequence_SO=chromosome | SO=protein_coding	1
>PVP01_0935900.1-p1	protein phosphatase PPM8 | transcript_product=protein phosphatase PPM8 | location=PvP01_09_v1:1541539-1544097(-) | protein_length=852 | sequence_SO=chromosome | SO=protein_coding	1
>PVP01_0936800.1-p1	3-oxo-5-alpha-steroid 4-dehydrogenase | transcript_product=3-oxo-5-alpha-steroid 4-dehydrogenase | location=PvP01_09_v1:1570800-1573210(-) | protein_length=296 | sequence_SO=chromosome | SO=protein_coding	1
>PVP01_0937200.1-p1	tudor staphylococcal nuclease | transcript_product=tudor staphylococcal nuclease | location=PvP01_09_v1:1596528-1599960(+) | protein_length=1064 | sequence_SO=chromosome | SO=protein_coding	1
>PVP01_0937400.1-p1	casein kinase 1 | transcript_product=casein kinase 1 | location=PvP01_09_v1:1606184-1608602(-) | protein_length=323 | sequence_SO=chromosome | SO=protein_coding|403256023|ref|XP_003920701.1| PREDICTED: casein kinase I isoform gamma	1
>PVP01_0938300.1-p1	CLPTM1 domain-containing protein | transcript_product=CLPTM1 domain-containing protein | location=PvP01_09_v1:1648973-1650925(-) | protein_length=650 | sequence_SO=chromosome | SO=protein_coding	1
>PVP01_0939100.1-p1	ubiquitin-related modifier 1 | transcript_product=ubiquitin-related modifier 1 | location=PvP01_09_v1:1680426-1680803(+) | protein_length=125 | sequence_SO=chromosome | SO=protein_coding	1
>PVP01_0939500.1-p1	protein phosphatase PPM2 | transcript_product=protein phosphatase PPM2 | location=PvP01_09_v1:1702099-1704717(+) | protein_length=872 | sequence_SO=chromosome | SO=protein_coding	1
>PVP01_0941700.1-p1	conserved Plasmodium protein, unknown function | transcript_product=conserved Plasmodium protein, unknown function | location=PvP01_09_v1:1842788-1851925(+) | protein_length=3045 | sequence_SO=chromosome | SO=protein_coding	1
>PVP01_0943200.1-p1	60S ribosomal protein L28 | transcript_product=60S ribosomal protein L28 | location=PvP01_09_v1:1912329-1913055(-) | protein_length=127 | sequence_SO=chromosome | SO=protein_coding	1
>PVP01_0943300.1-p1	60S ribosomal protein L35ae | transcript_product=60S ribosomal protein L35ae | location=PvP01_09_v1:1914562-1915692(-) | protein_length=146 | sequence_SO=chromosome | SO=protein_coding	1
>PVP01_0943500.1-p1	conserved Plasmodium protein, unknown function | transcript_product=conserved Plasmodium protein, unknown function | location=PvP01_09_v1:1920184-1921086(+) | protein_length=300 | sequence_SO=chromosome | SO=protein_coding	1
>PVP01_0944700.1-p1	40S ribosomal protein S21 | transcript_product=40S ribosomal protein S21 | location=PvP01_09_v1:1964566-1965229(+) | protein_length=82 | sequence_SO=chromosome | SO=protein_coding	1
>PVP01_0945600.1-p1	ras-related protein Rab-6 | transcript_product=ras-related protein Rab-6 | location=PvP01_09_v1:1987820-1989251(-) | protein_length=207 | sequence_SO=chromosome | SO=protein_coding	1
>PVP01_0945800.1-p1	coatomer subunit gamma | transcript_product=coatomer subunit gamma | location=PvP01_09_v1:1995740-1998772(-) | protein_length=1010 | sequence_SO=chromosome | SO=protein_coding	1
>PVP01_0946100.1-p1	dynamin-like protein | transcript_product=dynamin-like protein | location=PvP01_09_v1:2014300-2017158(-) | protein_length=814 | sequence_SO=chromosome | SO=protein_coding	1
>PVP01_0948700.1-p1	tryptophan-rich antigen | transcript_product=tryptophan-rich antigen | location=PvP01_09_v1:2140827-2145125(-) | protein_length=1386 | sequence_SO=chromosome | SO=protein_coding	1
>PVP01_0949000.1-p1	tryptophan-rich protein | transcript_product=tryptophan-rich protein | location=PvP01_09_v1:2164115-2165233(-) | protein_length=334 | sequence_SO=chromosome | SO=protein_coding;>PVP01_0948900.1-p1 | transcript=PVP01_0948900.1 | gene=PVP01_0948900 | organi	1
>PVP01_1003700.1-p1	phosphoenolpyruvate/phosphate translocator | transcript_product=phosphoenolpyruvate/phosphate translocator | location=PvP01_10_v1:188715-190337(+) | protein_length=540 | sequence_SO=chromosome | SO=protein_coding	1
>PVP01_1005600.1-p1	eukaryotic translation initiation factor 3 subunit E | transcript_product=eukaryotic translation initiation factor 3 subunit E | location=PvP01_10_v1:257369-259201(+) | protein_length=524 | sequence_SO=chromosome | SO=protein_coding	1
>PVP01_1006300.1-p1	Hsc70-interacting protein | transcript_product=Hsc70-interacting protein | location=PvP01_10_v1:279693-281543(-) | protein_length=467 | sequence_SO=chromosome | SO=protein_coding	1
>PVP01_1006600.1-p1	ubiquitin carboxyl-terminal hydrolase 14 | transcript_product=ubiquitin carboxyl-terminal hydrolase 14 | location=PvP01_10_v1:291412-293684(+) | protein_length=590 | sequence_SO=chromosome | SO=protein_coding	1
>PVP01_1006700.1-p1	ubiquitin-conjugating enzyme E2 N | transcript_product=ubiquitin-conjugating enzyme E2 N | location=PvP01_10_v1:295548-296628(+) | protein_length=152 | sequence_SO=chromosome | SO=protein_coding	1
>PVP01_1006800.1-p1	DNA replication licensing factor MCM3 | transcript_product=DNA replication licensing factor MCM3 | location=PvP01_10_v1:298381-301416(+) | protein_length=971 | sequence_SO=chromosome | SO=protein_coding	1
>PVP01_1008700.1-p1	acyl-CoA synthetase | transcript_product=acyl-CoA synthetase | location=PvP01_10_v1:385600-387624(-) | protein_length=674 | sequence_SO=chromosome | SO=protein_coding	1
>PVP01_1009900.1-p1	karyopherin beta | transcript_product=karyopherin beta | location=PvP01_10_v1:436072-439446(-) | protein_length=1124 | sequence_SO=chromosome | SO=protein_coding	1
>PVP01_1010900.1-p1	multidrug resistance protein 1 | transcript_product=multidrug resistance protein 1 | location=PvP01_10_v1:478739-483133(-) | protein_length=1464 | sequence_SO=chromosome | SO=protein_coding	1
>PVP01_1012200.1-p1	ATP-dependent RNA helicase DDX1 | transcript_product=ATP-dependent RNA helicase DDX1 | location=PvP01_10_v1:558667-561117(-) | protein_length=816 | sequence_SO=chromosome | SO=protein_coding	1
>PVP01_1013000.1-p1	adenosylhomocysteinase | transcript_product=adenosylhomocysteinase | location=PvP01_10_v1:586966-588399(-) | protein_length=477 | sequence_SO=chromosome | SO=protein_coding	1
>PVP01_1013900.1-p1	40S ribosomal protein S9 | transcript_product=40S ribosomal protein S9 | location=PvP01_10_v1:619483-620570(-) | protein_length=189 | sequence_SO=chromosome | SO=protein_coding	1
>PVP01_1014500.1-p1	40S ribosomal protein S24 | transcript_product=40S ribosomal protein S24 | location=PvP01_10_v1:660552-661177(+) | protein_length=133 | sequence_SO=chromosome | SO=protein_coding	1
>PVP01_1015600.1-p1	proteasome subunit beta type-1 | transcript_product=proteasome subunit beta type-1 | location=PvP01_10_v1:702214-703680(+) | protein_length=241 | sequence_SO=chromosome | SO=protein_coding	1
>PVP01_1016300.1-p1	eukaryotic translation initiation factor 3 subunit B | transcript_product=eukaryotic translation initiation factor 3 subunit B | location=PvP01_10_v1:724314-726464(-) | protein_length=716 | sequence_SO=chromosome | SO=protein_coding	1
>PVP01_1016700.1-p1	serine/arginine-rich splicing factor 1 | transcript_product=serine/arginine-rich splicing factor 1 | location=PvP01_10_v1:743534-744685(+) | protein_length=314 | sequence_SO=chromosome | SO=protein_coding	1
>PVP01_1017000.1-p1	60S ribosomal protein L12 | transcript_product=60S ribosomal protein L12 | location=PvP01_10_v1:751856-752847(+) | protein_length=165 | sequence_SO=chromosome | SO=protein_coding	1
>PVP01_1017100.1-p1	60S ribosomal protein L2 | transcript_product=60S ribosomal protein L2 | location=PvP01_10_v1:754842-755850(+) | protein_length=260 | sequence_SO=chromosome | SO=protein_coding|403302995|ref|XP_003942133.1| PREDICTED: 60S ribosomal	1
>PVP01_1017800.1-p1	40S ribosomal protein S11 | transcript_product=40S ribosomal protein S11 | location=PvP01_10_v1:793360-794326(+) | protein_length=151 | sequence_SO=chromosome | SO=protein_coding|403285515|ref|XP_003934068.1| PREDICTED: 40S ribosom	1
>PVP01_1018100.1-p1	BolA-like protein | transcript_product=BolA-like protein | location=PvP01_10_v1:803271-803531(+) | protein_length=86 | sequence_SO=chromosome | SO=protein_coding	1
>PVP01_1018300.1-p1	conserved Plasmodium protein, unknown function | transcript_product=conserved Plasmodium protein, unknown function | location=PvP01_10_v1:809517-814989(-) | protein_length=1371 | sequence_SO=chromosome | SO=protein_coding	1
>PVP01_1020200.1-p1	6-cysteine protein | transcript_product=6-cysteine protein | location=PvP01_10_v1:876065-878529(-) | protein_length=731 | sequence_SO=chromosome | SO=protein_coding	1
>PVP01_1020600.1-p1	purine nucleoside phosphorylase | transcript_product=purine nucleoside phosphorylase | location=PvP01_10_v1:890071-890808(+) | protein_length=245 | sequence_SO=chromosome | SO=protein_coding	1
>PVP01_1021300.1-p1	ras-related protein Rab-1B | transcript_product=ras-related protein Rab-1B | location=PvP01_10_v1:912112-913699(-) | protein_length=200 | sequence_SO=chromosome | SO=protein_coding	1
>PVP01_1022200.1-p1	inositol-3-phosphate synthase | transcript_product=inositol-3-phosphate synthase | location=PvP01_10_v1:938702-940763(+) | protein_length=622 | sequence_SO=chromosome | SO=protein_coding	1
>PVP01_1022500.1-p1	RNA pseudouridylate synthase | transcript_product=RNA pseudouridylate synthase | location=PvP01_10_v1:945202-979587(-) | protein_length=11461 | sequence_SO=chromosome | SO=protein_coding	1
>PVP01_1023000.1-p1	translationally-controlled tumor protein homolog | transcript_product=translationally-controlled tumor protein homolog | location=PvP01_10_v1:1000777-1001292(+) | protein_length=171 | sequence_SO=chromosome | SO=protein_coding	1
>PVP01_1026200.1-p1	conserved Plasmodium protein, unknown function | transcript_product=conserved Plasmodium protein, unknown function | location=PvP01_10_v1:1139125-1142808(-) | protein_length=1227 | sequence_SO=chromosome | SO=protein_coding	1
>PVP01_1026400.1-p1	cell differentiation protein | transcript_product=cell differentiation protein | location=PvP01_10_v1:1149163-1151568(-) | protein_length=801 | sequence_SO=chromosome | SO=protein_coding	1
>PVP01_1026900.1-p1	60S ribosomal protein L4 | transcript_product=60S ribosomal protein L4 | location=PvP01_10_v1:1166862-1168097(+) | protein_length=411 | sequence_SO=chromosome | SO=protein_coding	1
>PVP01_1028200.1-p1	small ubiquitin-related modifier | transcript_product=small ubiquitin-related modifier | location=PvP01_10_v1:1208043-1208494(+) | protein_length=101 | sequence_SO=chromosome | SO=protein_coding	1
>PVP01_1028300.1-p1	conserved Plasmodium protein, unknown function | transcript_product=conserved Plasmodium protein, unknown function | location=PvP01_10_v1:1210925-1212589(+) | protein_length=554 | sequence_SO=chromosome | SO=protein_coding	1
>PVP01_1030500.1-p1	actin-depolymerizing factor 1 | transcript_product=actin-depolymerizing factor 1 | location=PvP01_10_v1:1314308-1314847(-) | protein_length=122 | sequence_SO=chromosome | SO=protein_coding	1
>PVP01_1031100.1-p1	merozoite surface protein 3 | transcript_product=merozoite surface protein 3 | location=PvP01_10_v1:1337125-1338381(-) | protein_length=418 | sequence_SO=chromosome | SO=protein_coding	1
>PVP01_1031600.1-p1	merozoite surface protein 3 | transcript_product=merozoite surface protein 3 | location=PvP01_10_v1:1358155-1360860(-) | protein_length=901 | sequence_SO=chromosome | SO=protein_coding	1
>PVP01_1032600.1-p1	merozoite surface protein 8 | transcript_product=merozoite surface protein 8 | location=PvP01_10_v1:1390957-1392420(+) | protein_length=487 | sequence_SO=chromosome | SO=protein_coding	1
>PVP01_1033400.1-p1	rhoptry-associated protein 2 | transcript_product=rhoptry-associated protein 2 | location=PvP01_10_v1:1419394-1420596(+) | protein_length=400 | sequence_SO=chromosome | SO=protein_coding	1
>PVP01_1033600.1-p1	skeleton-binding protein 1 | transcript_product=skeleton-binding protein 1 | location=PvP01_10_v1:1427209-1427919(-) | protein_length=236 | sequence_SO=chromosome | SO=protein_coding	1
>PVP01_1033900.1-p1	tryptophan-rich antigen | transcript_product=tryptophan-rich antigen | location=PvP01_10_v1:1439806-1446842(-) | protein_length=2275 | sequence_SO=chromosome | SO=protein_coding	1
>PVP01_1101300.1-p1	Plasmodium exported protein, unknown function | transcript_product=Plasmodium exported protein, unknown function | location=PvP01_11_v1:62171-64808(+) | protein_length=822 | sequence_SO=chromosome | SO=protein_coding	1
>PVP01_1101700.1-p1	conserved Plasmodium protein, unknown function | transcript_product=conserved Plasmodium protein, unknown function | location=PvP01_11_v1:85325-86134(-) | protein_length=196 | sequence_SO=chromosome | SO=protein_coding	1
>PVP01_1103800.1-p1	ABC transporter E family member 1 | transcript_product=ABC transporter E family member 1 | location=PvP01_11_v1:160047-162035(+) | protein_length=619 | sequence_SO=chromosome | SO=protein_coding	1
>PVP01_1103900.1-p1	26S proteasome regulatory subunit RPN11 | transcript_product=26S proteasome regulatory subunit RPN11 | location=PvP01_11_v1:163813-165014(+) | protein_length=311 | sequence_SO=chromosome | SO=protein_coding	1
>PVP01_1104300.1-p1	alanine--tRNA ligase | transcript_product=alanine--tRNA ligase | location=PvP01_11_v1:174742-178335(-) | protein_length=1197 | sequence_SO=chromosome | SO=protein_coding	1
>PVP01_1105500.1-p1	nucleoside diphosphate kinase | transcript_product=nucleoside diphosphate kinase | location=PvP01_11_v1:217615-218064(-) | protein_length=149 | sequence_SO=chromosome | SO=protein_coding	1
>PVP01_1108100.1-p1	reticulon-like protein | transcript_product=reticulon-like protein | location=PvP01_11_v1:321602-322144(-) | protein_length=180 | sequence_SO=chromosome | SO=protein_coding	1
>PVP01_1110100.1-p1	proliferating cell nuclear antigen 1 | transcript_product=proliferating cell nuclear antigen 1 | location=PvP01_11_v1:402105-402929(+) | protein_length=274 | sequence_SO=chromosome | SO=protein_coding	1
>PVP01_1110200.1-p1	conserved Plasmodium protein, unknown function | transcript_product=conserved Plasmodium protein, unknown function | location=PvP01_11_v1:404011-412158(-) | protein_length=2606 | sequence_SO=chromosome | SO=protein_coding	1
>PVP01_1110900.1-p1	protein transport protein Sec24A | transcript_product=protein transport protein Sec24A | location=PvP01_11_v1:434668-438328(-) | protein_length=935 | sequence_SO=chromosome | SO=protein_coding	1
>PVP01_1111200.1-p1	falcilysin | transcript_product=falcilysin | location=PvP01_11_v1:452996-456457(-) | protein_length=1153 | sequence_SO=chromosome | SO=protein_coding	1
>PVP01_1112500.1-p1	CUGBP Elav-like family member 1 | transcript_product=CUGBP Elav-like family member 1 | location=PvP01_11_v1:536358-538080(+) | protein_length=513 | sequence_SO=chromosome | SO=protein_coding	1
>PVP01_1113100.1-p1	40S ribosomal protein S15 | transcript_product=40S ribosomal protein S15 | location=PvP01_11_v1:566983-567438(-) | protein_length=151 | sequence_SO=chromosome | SO=protein_coding	1
>PVP01_1113200.1-p1	YOP1-like protein | transcript_product=YOP1-like protein | location=PvP01_11_v1:573583-574044(+) | protein_length=153 | sequence_SO=chromosome | SO=protein_coding	1
>PVP01_1114000.1-p1	pyrroline carboxylate reductase | transcript_product=pyrroline carboxylate reductase | location=PvP01_11_v1:604024-605729(-) | protein_length=260 | sequence_SO=chromosome | SO=protein_coding	1
>PVP01_1114100.1-p1	T-complex protein 1, delta subunit | transcript_product=T-complex protein 1, delta subunit | location=PvP01_11_v1:606928-609269(-) | protein_length=529 | sequence_SO=chromosome | SO=protein_coding	1
>PVP01_1114800.1-p1	elongation factor 1-alpha | transcript_product=elongation factor 1-alpha | location=PvP01_11_v1:631642-632973(-) | protein_length=443 | sequence_SO=chromosome | SO=protein_coding;>PVP01_1114900.1-p1 | transcript=PVP01_1114900.1 | gene=	1
>PVP01_1116400.1-p1	serine/threonine protein phosphatase 5 | transcript_product=serine/threonine protein phosphatase 5 | location=PvP01_11_v1:707209-709257(-) | protein_length=682 | sequence_SO=chromosome | SO=protein_coding	1
>PVP01_1116700.1-p1	RAP protein | transcript_product=RAP protein | location=PvP01_11_v1:717063-719975(+) | protein_length=970 | sequence_SO=chromosome | SO=protein_coding	1
>PVP01_1117800.1-p1	proteasome subunit alpha type-7 | transcript_product=proteasome subunit alpha type-7 | location=PvP01_11_v1:755452-756744(-) | protein_length=241 | sequence_SO=chromosome | SO=protein_coding	1
>PVP01_1120400.1-p1	nicotinate phosphoribosyltransferase | transcript_product=nicotinate phosphoribosyltransferase | location=PvP01_11_v1:884955-886973(+) | protein_length=672 | sequence_SO=chromosome | SO=protein_coding	1
>PVP01_1121200.1-p1	choline/ethanolaminephosphotransferase | transcript_product=choline/ethanolaminephosphotransferase | location=PvP01_11_v1:908604-911363(+) | protein_length=390 | sequence_SO=chromosome | SO=protein_coding	1
>PVP01_1122000.1-p1	protein DJ-1 | transcript_product=protein DJ-1 | location=PvP01_11_v1:978176-979083(+) | protein_length=189 | sequence_SO=chromosome | SO=protein_coding	1
>PVP01_1122700.1-p1	pyruvate kinase | transcript_product=pyruvate kinase | location=PvP01_11_v1:1002220-1004510(-) | protein_length=511 | sequence_SO=chromosome | SO=protein_coding	1
>PVP01_1122800.1-p1	conserved protein, unknown function | transcript_product=conserved protein, unknown function | location=PvP01_11_v1:1007810-1008919(-) | protein_length=369 | sequence_SO=chromosome | SO=protein_coding	1
>PVP01_1123500.1-p1	conserved Plasmodium protein, unknown function | transcript_product=conserved Plasmodium protein, unknown function | location=PvP01_11_v1:1030329-1034924(+) | protein_length=1531 | sequence_SO=chromosome | SO=protein_coding	1
>PVP01_1125500.1-p1	hexokinase | transcript_product=hexokinase | location=PvP01_11_v1:1109511-1110992(-) | protein_length=493 | sequence_SO=chromosome | SO=protein_coding	1
>PVP01_1126700.1-p1	leucine--tRNA ligase | transcript_product=leucine--tRNA ligase | location=PvP01_11_v1:1181608-1185678(-) | protein_length=1356 | sequence_SO=chromosome | SO=protein_coding	1
>PVP01_1127700.1-p1	nascent polypeptide-associated complex subunit alpha | transcript_product=nascent polypeptide-associated complex subunit alpha | location=PvP01_11_v1:1213876-1214902(-) | protein_length=184 | sequence_SO=chromosome | SO=protein_coding	1
>PVP01_1128300.1-p1	pyridoxine biosynthesis protein PDX1 | transcript_product=pyridoxine biosynthesis protein PDX1 | location=PvP01_11_v1:1235081-1235989(+) | protein_length=302 | sequence_SO=chromosome | SO=protein_coding	1
>PVP01_1128400.1-p1	conserved Plasmodium protein, unknown function | transcript_product=conserved Plasmodium protein, unknown function | location=PvP01_11_v1:1237970-1242169(+) | protein_length=1399 | sequence_SO=chromosome | SO=protein_coding	1
>PVP01_1130000.1-p1	acyl-CoA synthetase | transcript_product=acyl-CoA synthetase | location=PvP01_11_v1:1283252-1287196(+) | protein_length=1314 | sequence_SO=chromosome | SO=protein_coding	1
>PVP01_1130100.1-p1	cell division cycle protein 48 homologue | transcript_product=cell division cycle protein 48 homologue | location=PvP01_11_v1:1289155-1291792(+) | protein_length=822 | sequence_SO=chromosome | SO=protein_coding	1
>PVP01_1131000.1-p1	malate dehydrogenase | transcript_product=malate dehydrogenase | location=PvP01_11_v1:1330921-1331862(-) | protein_length=313 | sequence_SO=chromosome | SO=protein_coding	1
>PVP01_1131200.1-p1	60S ribosomal protein L27a | transcript_product=60S ribosomal protein L27a | location=PvP01_11_v1:1337980-1338588(-) | protein_length=148 | sequence_SO=chromosome | SO=protein_coding	1
>PVP01_1131900.1-p1	conserved Plasmodium protein, unknown function | transcript_product=conserved Plasmodium protein, unknown function | location=PvP01_11_v1:1363723-1365401(-) | protein_length=455 | sequence_SO=chromosome | SO=protein_coding	1
>PVP01_1132300.1-p1	malate:quinone oxidoreductase | transcript_product=malate:quinone oxidoreductase | location=PvP01_11_v1:1385141-1386778(-) | protein_length=545 | sequence_SO=chromosome | SO=protein_coding	1
>PVP01_1133100.1-p1	pyridoxal kinase | transcript_product=pyridoxal kinase | location=PvP01_11_v1:1413256-1414671(-) | protein_length=364 | sequence_SO=chromosome | SO=protein_coding	1
>PVP01_1133500.1-p1	conserved Plasmodium protein, unknown function | transcript_product=conserved Plasmodium protein, unknown function | location=PvP01_11_v1:1428202-1436468(+) | protein_length=2354 | sequence_SO=chromosome | SO=protein_coding	1
>PVP01_1135200.1-p1	myosin E | transcript_product=myosin E | location=PvP01_11_v1:1496584-1502544(+) | protein_length=1986 | sequence_SO=chromosome | SO=protein_coding	1
>PVP01_1137000.1-p1	eukaryotic translation initiation factor 3 subunit L | transcript_product=eukaryotic translation initiation factor 3 subunit L | location=PvP01_11_v1:1571146-1573008(+) | protein_length=620 | sequence_SO=chromosome | SO=protein_coding	1
>PVP01_1138400.1-p1	transketolase | transcript_product=transketolase | location=PvP01_11_v1:1629145-1631157(-) | protein_length=670 | sequence_SO=chromosome | SO=protein_coding	1
>PVP01_1138700.1-p1	histone H3 | transcript_product=histone H3 | location=PvP01_11_v1:1636750-1637160(-) | protein_length=136 | sequence_SO=chromosome | SO=protein_coding;>PVP01_1131600.1-p1 | transcript=PVP01_1131600.1 | gene=PVP01_1131600 | organism=Pla	1
>PVP01_1140100.1-p1	ornithine aminotransferase | transcript_product=ornithine aminotransferase | location=PvP01_11_v1:1711685-1712929(-) | protein_length=414 | sequence_SO=chromosome | SO=protein_coding	1
>PVP01_1140200.1-p1	T-complex protein 1 subunit zeta | transcript_product=T-complex protein 1 subunit zeta | location=PvP01_11_v1:1716013-1717840(-) | protein_length=529 | sequence_SO=chromosome | SO=protein_coding	1
>PVP01_1142000.1-p1	translation initiation factor IF-2 | transcript_product=translation initiation factor IF-2 | location=PvP01_11_v1:1779289-1782309(-) | protein_length=1006 | sequence_SO=chromosome | SO=protein_coding	1
>PVP01_1142100.1-p1	glutaredoxin-like protein | transcript_product=glutaredoxin-like protein | location=PvP01_11_v1:1785212-1785874(+) | protein_length=220 | sequence_SO=chromosome | SO=protein_coding	1
>PVP01_1142200.1-p1	coatomer alpha subunit | transcript_product=coatomer alpha subunit | location=PvP01_11_v1:1787120-1791935(-) | protein_length=1399 | sequence_SO=chromosome | SO=protein_coding	1
>PVP01_1142400.1-p1	polypyrimidine tract-binding protein | transcript_product=polypyrimidine tract-binding protein | location=PvP01_11_v1:1805221-1808242(+) | protein_length=757 | sequence_SO=chromosome | SO=protein_coding	1
>PVP01_1143000.1-p1	long chain polyunsaturated fatty acid elongation enzyme | transcript_product=long chain polyunsaturated fatty acid elongation enzyme | location=PvP01_11_v1:1827081-1828631(-) | protein_length=291 | sequence_SO=chromosome | SO=protein_c	1
>PVP01_1147400.1-p1	Plasmodium exported protein, unknown function | transcript_product=Plasmodium exported protein, unknown function | location=PvP01_11_v1:2023910-2024682(+) | protein_length=182 | sequence_SO=chromosome | SO=protein_coding	1
>PVP01_1147500.1-p1	Plasmodium exported protein, unknown function | transcript_product=Plasmodium exported protein, unknown function | location=PvP01_11_v1:2029337-2030483(+) | protein_length=268 | sequence_SO=chromosome | SO=protein_coding	1
>PVP01_1148700.1-p1	PIR protein | transcript_product=PIR protein | location=PvP01_11_v1:2101327-2102980(+) | protein_length=461 | sequence_SO=chromosome | SO=protein_coding	1
>PVP01_1201400.1-p1	Plasmodium exported protein (PHIST), unknown function | transcript_product=Plasmodium exported protein (PHIST), unknown function | location=PvP01_12_v1:54908-56006(-) | protein_length=300 | sequence_SO=chromosome | SO=protein_coding	1
>PVP01_1201600.1-p1	Plasmodium exported protein, unknown function | transcript_product=Plasmodium exported protein, unknown function | location=PvP01_12_v1:60968-62073(-) | protein_length=298 | sequence_SO=chromosome | SO=protein_coding	1
>PVP01_1201700.1-p1	hypothetical protein | transcript_product=hypothetical protein | location=PvP01_12_v1:67053-67652(+) | protein_length=142 | sequence_SO=chromosome | SO=protein_coding	1
>PVP01_1202300.1-p1	thioredoxin-related protein | transcript_product=thioredoxin-related protein | location=PvP01_12_v1:97200-98220(+) | protein_length=209 | sequence_SO=chromosome | SO=protein_coding	1
>PVP01_1203000.1-p1	conserved Plasmodium protein, unknown function | transcript_product=conserved Plasmodium protein, unknown function | location=PvP01_12_v1:125291-126796(-) | protein_length=190 | sequence_SO=chromosome | SO=protein_coding	1
>PVP01_1203200.1-p1	glycerol kinase | transcript_product=glycerol kinase | location=PvP01_12_v1:135406-136911(-) | protein_length=501 | sequence_SO=chromosome | SO=protein_coding	1
>PVP01_1203300.1-p1	60S ribosomal protein L17 | transcript_product=60S ribosomal protein L17 | location=PvP01_12_v1:138927-140517(-) | protein_length=199 | sequence_SO=chromosome | SO=protein_coding	1
>PVP01_1203800.1-p1	phosphatidylinositol transfer protein | transcript_product=phosphatidylinositol transfer protein | location=PvP01_12_v1:155262-158072(-) | protein_length=936 | sequence_SO=chromosome | SO=protein_coding	1
>PVP01_1204700.1-p1	lysine--tRNA ligase | transcript_product=lysine--tRNA ligase | location=PvP01_12_v1:187450-189480(+) | protein_length=585 | sequence_SO=chromosome | SO=protein_coding	1
>PVP01_1205600.1-p1	glutamate--tRNA ligase | transcript_product=glutamate--tRNA ligase | location=PvP01_12_v1:220321-222684(+) | protein_length=787 | sequence_SO=chromosome | SO=protein_coding	1
>PVP01_1205700.1-p1	nucleoside diphosphate hydrolase | transcript_product=nucleoside diphosphate hydrolase | location=PvP01_12_v1:224159-225190(+) | protein_length=203 | sequence_SO=chromosome | SO=protein_coding	1
>PVP01_1207100.1-p1	ethanolamine-phosphate cytidylyltransferase | transcript_product=ethanolamine-phosphate cytidylyltransferase | location=PvP01_12_v1:287429-289556(-) | protein_length=606 | sequence_SO=chromosome | SO=protein_coding	1
>PVP01_1207300.1-p1	DNA/RNA-binding protein Alba 4 | transcript_product=DNA/RNA-binding protein Alba 4 | location=PvP01_12_v1:301820-303103(+) | protein_length=373 | sequence_SO=chromosome | SO=protein_coding	1
>PVP01_1208000.1-p1	6-cysteine protein | transcript_product=6-cysteine protein | location=PvP01_12_v1:323534-324835(+) | protein_length=433 | sequence_SO=chromosome | SO=protein_coding	1
>PVP01_1208400.1-p1	conserved Plasmodium protein, unknown function | transcript_product=conserved Plasmodium protein, unknown function | location=PvP01_12_v1:333150-349801(-) | protein_length=5549 | sequence_SO=chromosome | SO=protein_coding	1
>PVP01_1208500.1-p1	DNA/RNA-binding protein Alba 2 | transcript_product=DNA/RNA-binding protein Alba 2 | location=PvP01_12_v1:352993-354003(-) | protein_length=207 | sequence_SO=chromosome | SO=protein_coding	1
>PVP01_1208700.1-p1	protein transport protein SEC61 subunit alpha | transcript_product=protein transport protein SEC61 subunit alpha | location=PvP01_12_v1:359590-361313(-) | protein_length=472 | sequence_SO=chromosome | SO=protein_coding	1
>PVP01_1209000.1-p1	conserved Plasmodium protein, unknown function | transcript_product=conserved Plasmodium protein, unknown function | location=PvP01_12_v1:370679-374059(-) | protein_length=1080 | sequence_SO=chromosome | SO=protein_coding	1
>PVP01_1209100.1-p1	isocitrate dehydrogenase [NADP], mitochondrial | transcript_product=isocitrate dehydrogenase [NADP], mitochondrial | location=PvP01_12_v1:376609-378018(+) | protein_length=469 | sequence_SO=chromosome | SO=protein_coding	1
>PVP01_1209700.1-p1	thioredoxin 2 | transcript_product=thioredoxin 2 | location=PvP01_12_v1:398246-399338(+) | protein_length=157 | sequence_SO=chromosome | SO=protein_coding	1
>PVP01_1210600.1-p1	heat shock protein 110 | transcript_product=heat shock protein 110 | location=PvP01_12_v1:440718-443504(-) | protein_length=928 | sequence_SO=chromosome | SO=protein_coding	1
>PVP01_1211800.1-p1	phosphoethanolamine N-methyltransferase | transcript_product=phosphoethanolamine N-methyltransferase | location=PvP01_12_v1:516943-518252(-) | protein_length=264 | sequence_SO=chromosome | SO=protein_coding	1
>PVP01_1212000.1-p1	phosphoenolpyruvate carboxykinase | transcript_product=phosphoenolpyruvate carboxykinase | location=PvP01_12_v1:534264-536063(-) | protein_length=599 | sequence_SO=chromosome | SO=protein_coding	1
>PVP01_1212200.1-p1	myosin A | transcript_product=myosin A | location=PvP01_12_v1:539112-541853(-) | protein_length=817 | sequence_SO=chromosome | SO=protein_coding	1
>PVP01_1212700.1-p1	aconitate hydratase | transcript_product=aconitate hydratase | location=PvP01_12_v1:557005-559728(-) | protein_length=907 | sequence_SO=chromosome | SO=protein_coding	1
>PVP01_1212800.1-p1	40S ribosomal protein S6 | transcript_product=40S ribosomal protein S6 | location=PvP01_12_v1:563698-564750(+) | protein_length=350 | sequence_SO=chromosome | SO=protein_coding	1
>PVP01_1213600.1-p1	60S ribosomal protein L18a | transcript_product=60S ribosomal protein L18a | location=PvP01_12_v1:585481-586283(+) | protein_length=184 | sequence_SO=chromosome | SO=protein_coding	1
>PVP01_1216400.1-p1	elongation factor 1-gamma | transcript_product=elongation factor 1-gamma | location=PvP01_12_v1:683436-685023(-) | protein_length=411 | sequence_SO=chromosome | SO=protein_coding	1
>PVP01_1216500.1-p1	60S ribosomal protein L6-2 | transcript_product=60S ribosomal protein L6-2 | location=PvP01_12_v1:688276-688971(+) | protein_length=231 | sequence_SO=chromosome | SO=protein_coding	1
>PVP01_1216600.1-p1	26S proteasome regulatory subunit RPN3 | transcript_product=26S proteasome regulatory subunit RPN3 | location=PvP01_12_v1:689980-691802(-) | protein_length=513 | sequence_SO=chromosome | SO=protein_coding	1
>PVP01_1217900.1-p1	nuclear movement protein | transcript_product=nuclear movement protein | location=PvP01_12_v1:745244-746380(-) | protein_length=378 | sequence_SO=chromosome | SO=protein_coding	1
>PVP01_1219300.1-p1	MSP7-like protein | transcript_product=MSP7-like protein | location=PvP01_12_v1:792292-793554(+) | protein_length=420 | sequence_SO=chromosome | SO=protein_coding	1
>PVP01_1219600.1-p1	MSP7-like protein | transcript_product=MSP7-like protein | location=PvP01_12_v1:799393-800544(+) | protein_length=383 | sequence_SO=chromosome | SO=protein_coding	1
>PVP01_1219700.1-p1	MSP7-like protein | transcript_product=MSP7-like protein | location=PvP01_12_v1:801648-802814(+) | protein_length=388 | sequence_SO=chromosome | SO=protein_coding;>PVP01_1220000.1-p1 | transcript=PVP01_1220000.1 | gene=PVP01_1220000 | organism=Plasmodium_	1
>PVP01_1220400.1-p1	MSP7-like protein | transcript_product=MSP7-like protein | location=PvP01_12_v1:817363-818496(+) | protein_length=377 | sequence_SO=chromosome | SO=protein_coding	1
>PVP01_1221300.1-p1	conserved Plasmodium protein, unknown function | transcript_product=conserved Plasmodium protein, unknown function | location=PvP01_12_v1:847439-848149(-) | protein_length=236 | sequence_SO=chromosome | SO=protein_coding	1
>PVP01_1221700.1-p1	20 kDa chaperonin | transcript_product=20 kDa chaperonin | location=PvP01_12_v1:861353-863185(-) | protein_length=259 | sequence_SO=chromosome | SO=protein_coding	1
>PVP01_1221800.1-p1	isoleucine--tRNA ligase | transcript_product=isoleucine--tRNA ligase | location=PvP01_12_v1:864226-867846(+) | protein_length=1206 | sequence_SO=chromosome | SO=protein_coding	1
>PVP01_1222800.1-p1	60S ribosomal protein L23 | transcript_product=60S ribosomal protein L23 | location=PvP01_12_v1:891314-892118(-) | protein_length=139 | sequence_SO=chromosome | SO=protein_coding	1
>PVP01_1222900.1-p1	glutamine--tRNA ligase | transcript_product=glutamine--tRNA ligase | location=PvP01_12_v1:893887-896487(+) | protein_length=866 | sequence_SO=chromosome | SO=protein_coding	1
[truncated: 213 more rows]

## Sheet: Mascot
Accession	Protein Description	Avg. Xrep
393281674	ATP synthase F0 subunit 6 (mitochondrion)	1
403253959	60S ribosomal protein L13a-like	1
[truncated: 2,183 more rows]

## Sheet: MSGF
Accession	Protein Description	Avg. Xrep
[truncated: 2,035 more rows]

[truncated: 7 more sheets: Sequest, Crux, 5x of 5x, 4x of 5x, 3x of 5x, 2x of 5x, 1x of 5x]
