# Supplementary material for: A large scale Plasmodium vivax- Saimiri boliviensis trophozoite-schizont transition proteome
Source: PLoS One. 2017 Aug 22;12(8):e0182561. doi: 10.1371/journal.pone.0182561 (PMC5567661; doi:10.1371/journal.pone.0182561)
Supplement: S10 Table — This table lists P. vivax and S. boliviensis proteins identified in trophozoite-schizont transition Proteomes 1 and/or 2 at least twice by a search engine, that are either annotated as involved in cell adhesion, or predicted to be adhesins [78]. We also included 45 VIR proteins, which mainly have no known function but have been hypothesized to be involved in adhesion, and/or trafficking, signaling, or antigenic variation/immune evasion. (XLS) [file pone.0182561.s010.xls]

## Sheet: S10_Table
Supplemental Table S10. Host and parasite transition proteome cytoadhesion-related proteins.
P. vivax proteins.
Accession	Protein	Functional annotation
annotated proteins
PVP01_0812300.1	rhoptry associated adhesin
PVP01_0107500.1	rhoptry-associated membrane antigen	[67] P. falciparum homolog: GO - Biological process single organismal cell-cell adhesion Source: GeneDB
PVP01_0623800.1	duffy binding protein	Plasmodium vivax Duffy binding protein peptides specifically bind to reticulocytes.
PVP01_0216900.1	knob-associated histidine-rich protein	[67] P falciparum homolog: KAHRP might mimick human histidine-rich glycoproteins to anchor host thrombospondin or a parasite analog in a binding complex with the endothelial cell receptor.
PVP01_0423500.1	knob-associated histidine-rich protein
PVP01_0517600.1	rhoptry neck protein 5 (RON5)	binds reticulocytes as part of merozoite invasion of host cells [78]
PVP01_0703800	RhopH3	P. falciparum homolog binds erythrocytes, is important for RBC invasion 79]
PVP01_1255000.1	hypothetical protein, conserved	RON-2 rhoptry protein, required for host cell attachment [45]
PVP01_0623100	erythrocyte binding protein; Plasmodium exported protein	predicted adhesin [80]; erythrocyte binding protein [62]
PVP01_0623800	Duffy receptor precursor	predicted adhesin [80]; binds to the human erythrocyte Duffy blood group determinant [69]
predicted adhesins [80]
PVP01_1219600.1	merozoite surface protein 7-like
PVP01_1031600.1	merozoite surface protein 3 gamma
PVP01_1032600.1	merozoite surface protein 3 gamma
PVP01_1031500.1	merozoite surface protein 3b
PVP01_0601500.1	Phist protein (Pf-fam-b)	blasts to Fap1 adhesin, fibrinogen receptor A; has signal peptide, protein export domains, PRESAN domain; cytoskeleton; trafficking; surface annotation [159]
PVP01_1147600.1	Pv-fam-d protein	blasts to Staphylococcus uro-adherence factor A, platelet binding protein GspB (serine rich adhesin for platelets)
PVP01_0911200.1	asparagine-rich antigen	[67] P. falciparum: deadenylation-dependent decapping of nuclear-transcribed mRNA
PVP01_0934200.1	apical merozoite antigen 1	GO:0009405: pathogenesis
PVP01_0720400.1	50S ribosomal protein L29, putative
PVP01_0728900.1	major blood-stage surface antigen
PVP01_1201600.1	Plasmodium exported protein, unknown function	protein export domains [66]
PVP01_1470200.1	Plasmodium exported protein, unknown function	orthologs: Na/K/Ca exchanger; probable S/T protein kinase kinX; neurofilament medium polypeptide [66]
PVP01_0000130.1	tryptophan-rich antigen (Pv-fam-a)
PVP01_1440900.1	glideosome-associated protein 45
PVP01_0107900.1	E3 ubiquitin-protein ligase
PVP01_0422800.1	Plasmodium exported protein (PHIST), unknown function
PVP01_0613800.1	merozoite TRAP-like protein	A conserved molecular motor drives cell invasion and gliding motility across malaria life cycle stages and other apicomplexan parasites; Semaphorin-7A is an erythrocyte receptor for P. falciparum merozoite-specific TRAP homolog, MTRAP. GO:0020009 microneme. Of the specialized secretory compartments identified in apicomplexans, micronemes discharge their contents first, during initial contact of t…
PVP01_0312100.1	conserved Plasmodium protein, unknown function
PVP01_0206500.1	conserved Plasmodium protein, unknown function
PVP01_1333500.1	conserved Plasmodium protein, unknown function
PVP01_0106700.1	conserved Plasmodium protein, unknown function
PVP01_0903800.1	hypothetical protein
PVP01_0801000.1	hypothetical protein
PVP01_1026200.1	conserved Plasmodium protein, unknown function
PVP01_1450000.1	conserved Plasmodium protein, unknown function
PVP01_0620400.1	hypothetical protein
PVP01_1109300.1	conserved Plasmodium protein, unknown function
PVP01_1238700.1	conserved Plasmodium protein, unknown function
PVP01_1418300.1	hypothetical protein
PIR proteins
PVP01_0007000.1	PIR protein
PVP01_0119800.1	PIR protein
PVP01_0121700.1	PIR protein
PVP01_0201500.1	PIR protein
PVP01_0201600.1	PIR protein
PVP01_0201700.1	PIR protein
PVP01_0201800.1	PIR protein
PVP01_0201900.1	PIR protein
PVP01_0403500.1	PIR protein
PVP01_0403900.1	PIR protein
PVP01_0625000.1	PIR protein
PVP01_0624000.1	PIR protein
PVP01_0736900.1	PIR protein
PVP01_0839600.1	PIR protein
PVP01_0841000.1	PIR protein
PVP01_0949700.1	PIR protein
PVP01_0950000.1	PIR protein
PVP01_1148700.1	PIR protein
PVP01_1149100.1	PIR protein
PVP01_1100200.1	PIR protein
PVP01_1272300.1	PIR protein
PVP01_1272400.1	PIR protein
PVP01_1201300.1	PIR protein
PVP01_1471200.1	PIR protein
PVP01_1472500.1	PIR protein
PVP01_0000820.1	PIR protein
PVP01_0004010.1	PIR protein
PVP01_0004240.1	PIR protein
PVP01_0010640.1	PIR protein
PVP01_0005930.1	PIR protein
PVP01_0001500.1	PIR protein
PVP01_0007290.1	PIR protein
PVP01_0001710.1	PIR protein
PVP01_0007720.1	PIR protein
PVP01_0011150.1	PIR protein
PVP01_0004920.1	PIR protein
PVP01_0002330.1	PIR protein
PVP01_0002400.1	PIR protein
PVP01_0002130.1	PIR protein
PVP01_0008930.1	PIR protein
PVP01_0009220.1	PIR protein
PVP01_0003290.1	PIR protein
PVP01_0003360.1	PIR protein
PVP01_0003350.1	PIR protein
PVP01_0010240.1	PIR protein
S. boliviensis proteins
403278922	transferrin receptor protein 1	Transferrin receptor (CD71 antigen) is involved in cellular uptake of iron to endosomes; also important for P. vivax [15] and P. yoelli [16] invasion of reticulocytes
403293669	thrombospondin-3 isoform 1	Adhesive glycoprotein that mediates cell-to-cell and cell-to-matrix interactions. Can bind to fibrinogen, fibronectin, laminin and type V collagen
403280830	integrin beta-4, partial	Integrin alpha-6/beta-4 is a receptor for laminin. Plays a critical structural role in the hemidesmosome of epithelial cells. GO - Biological process cell adhesion, cell junction assembly, autophagy
403293368	fermitin family homolog 3	Plays a central role in cell adhesion in hematopoietic cells. Acts by activating the integrin beta-1-3 (ITGB1, ITGB2 and ITGB3). Required for integrin-mediated platelet adhesion and leukocyte adhesion to endothelial cells
403307638	carcinoembryonic antigen-related cell adhesion molecule 18 (CECAM 18)	CECAMs are accessory adhesion molecules]; potential transmembrane glycoprotein; immunoglobulin superfamily
403271700	protocadherin-10-like	Potential calcium-dependent cell-adhesion protein
403274126	ankyrin-3	May participate in the maintenance/targeting of ion channels and cell adhesion molecules at the nodes of Ranvier and axonal initial segments
403275242	cytospin-B-like isoform 1	Involved in cytokinesis and spindle organization. May play a role in actin cytoskeleton organization and microtubule stabilization and hence required for proper cell adhesion and migration
403279865	vitronectin	cell adhesion and spreading factor found in serum and tissues. Vitronectin interacts with glycosaminoglycans and proteoglycans. Is recognized by certain members of the integrin family and serves as a cell-to-substrate adhesion molecule
403284419	T-cell surface antigen CD2	CD2 interacts with lymphocyte function-associated antigen (LFA-3) and CD48/BCM1 to mediate adhesion between T-cells and other cell types.
403298269	talin-2	[67] As a major component of focal adhesion plaques that links integrin to the actin cytoskeleton, may play an important role in cell adhesion. Recruits PIP5K1C to focal adhesion plaques and strongly activates its kinase activity (By similarity)
403295024	supervillin	Forms a high-affinity link between the actin cytoskeleton and the membrane. Appears to be involved in myosin II assembly. May modulate myosin II regulation through MLCK during cell spreading, an initial step in cell migration. May play a role in invadopodial function. Isoform 2 may be involved in modulation of focal adhesions
403307431	neuroplastin	Probable homophilic and heterophilic cell adhesion molecule involved in long term potentiation at hippocampal excitatory synapses
403291260	transforming protein RhoA	[67] Regulates a signal transduction pathway linking plasma membrane receptors to the assembly of focal adhesions and actin stress fibers. Involved in a microtubule-dependent signal that is required for the myosin contractile ring formation during cell cycle cytokinesis.
403263754	retinoschisin	[67] May be active in cell adhesion processes during retinal development. GO - Biological process adaptation of rhodopsin mediated signaling
403290290	PDZ domain-containing protein 2	[67] GO - Biological process: cell adhesion
